# Supplementary material
Source: HighWire-hosted journal article supplement (https://ard.bmj.com/content/77/10/1454)
Supplement: inline-supplementary-material-1 [file inline-supplementary-material-1.xlsx]

## Sheet: Table S1
Table S1. The Kolmogorov-Smirnov (KS) test for AP p-values distributions of the interaction analysis with the rs4507692 SNPa,b in EIRA and NARAC imputed data.
Case-Control Group	SNPs group	Number of initial input SNPs	Number of SNPs after cut off c	% of SNPs analyzed	Number of SNPs with AP p-value <0.05	% of analyzed SNPs with AP p-value < 0.05	D^+ value from KS test d	Group of SNPs with enrichment of significant interactions
EIRAa	Risk	241759	160614	66.44	4473	2.78	0.018	Na
	No-risk	4515110	3031267	67.14	91223	3.01
NARACb	Risk	787499	457899	58.15	11931	2.61	0.001	Na
	No-risk	8244955	4412616	53.52	132993	3.01
a SNP with MAF = 0.452 (the same as MAF of SE in EIRA). P-value association = 0.567 in EIRA
b SNP with MAF = 0.432 (the same as MAF of SE in NARAC). P-value association = 0.666 in NARAC
c Interaction was done using sex and the 10 first eigenvectors as co-variables. A minimum of five individuals in each of the four combinations that formed the basis for the OR calculations was required.
d KS test was applied using the alternative hypothesis were the cumulative distribution function of x (risk SNPs) lies above that of y (no-risk SNPs). The KS test p-value in EIRA was 1.254622e-43, that is in fact a higher value than the observed when the distributions for AP p-values in the HLA-DRB1 SE allele analysis were tested. The KS-test p-value is 0.4583 in NARAC.

## Sheet: Table S2
Table S2. The Kolmogorov-Smirnov test for AP p-values distributions of the interaction analysis in EIRA and NARAC GWAS (non-imputed data).
Case-Control Group. region excluded and SNPs left after exclusion	Target marker for interaction	SNPs group	Number of initial input SNPs	Number of SNPs after cut off c	% of SNPs analyzed	Number of SNPs with AP p-value <0.05	% of analyzed SNPs with AP p-value < 0.05	D^+ value from KS test d	KS test P value	Group of SNPs with enrichment of significant interactions
EIRA	SE	Risk	14411	11875	82.4	2651	22.32	0.328	<2.2e-16	Risk
without PTPN22 and MHC loci 281,196 SNPs		No-risk	266778	222299	83.33	6519	2.93
	rs4507692a	Risk	14411	12185	84.55	328	2.69	0.006	0.3965	Na
		No-risk	266778	226112	84.76	7040	3.11
Pruned data	SE	Risk	14411	10073	69.89	2362	23.45	0.3407	<2.2e-16	Risk
		No-risk	266778	187318	70.21	5739	3.06
EIRA	SE	Risk	13508	11122	82.34	2511	22.58	0.33	<2.2e-16	Risk
without chr6 263,530 SNPs		No-risk	250022	208455	83.37	6080	2.92
	rs4507692a	Risk	13508	11422	84.56	305	2.67	0.007	0.3202	Na
		No-risk	250022	212029	84.8	6537	3.08
NARAC	SE	Risk	38815	15218	39.21	2355	15.48	0.26	<2.2e-16	Risk
without PTPN22 and MHC loci 396,968 SNPs		No-risk	358153	143574	40.09	4761	3.32
	rs4507692b	Risk	38815	29775	76.71	749	2.52	0.002	0.8456	Na
		No-risk	358153	282915	78.99	8314	2.94
Pruned data	SE	Risk	38815	11669	30.06	1931	16.54	0.274	<2.2e-16	Risk
		No-risk	358153	110998	30.99	3902	3.51
NARAC	SE	Risk	36231	14206	39.21	2210	15.56	0.262	<2.2e-16	Risk
without chr6 372,067 SNPs		No-risk	335836	134779	40.13	4439	3.29
	rs4507692b	Risk	36231	27816	76.77	691	2.48	0.002	0.8332	Na
		No-risk	335836	265360	79.01	7778	2.93
a rs4507692 SNP exhbited the same minor allele frequency (MAF) as HLA-DRB1 SE alleles in EIRA and NARAC, but is not associated with ACPA-positive RA.
b SNP with MAF = 0.432 (the same as MAF of SE in NARAC). P-value association =0.666 in NARAC
c Interaction was done using sex and the 10 first eigenvectors as co-variables. A minimum of five individuals in each of the four combinations that formed the basis for the OR calculations was required. For the Prune data the cut off included the removal of varaints in high LD (r2>0.8) among them
d Kolmogorov-Smirnov test was applied using the alternative hypothesis were the cumulative distribution function of x (risk SNPs) lies above that of y (no-risk SNPs)

## Sheet: Table S3
Table S3. Selected SNPs in interaction with the HLA-DRB1 SE alleles from EIRA and NARAC. The SNPs were selected whether they exhibited AP p-value < 0.05 and the same direction of AP in both studies. (a) The interaction tests were done using the risk allele from the tested SNP. (b) 1 refers to the risk factor or allele. Complementary 0 refers to the opposite no-risk factor or allele.
Chromosome	BP	SNP	Cohort	SNPs Group	Minor allele	Major allele	Test allelea	No controls test allele 0 risk factor 0b	No cases test allele 0 risk factor 0b	No cases test allele 1 risk factor 0b	No controls test allele 1 risk factor 0b	No cases test allele 0 risk factor 1b	No controls test allele 0 risk factor 1b	No cases test allele 1 risk factor 1b	No controls test allele 1 risk factor 1b	OR double exposure[Low - High CI]	OR test SNP [Low - High CI]	OR risk factor [Low - High CI]	AP direction	AP [Low - High CI]	AP p-value	FDR AP q-value	Chromosome	BP	SNP	Cohort	SNPs Group	Minor allele	Major allele	Test allelea	No controls test allele 0 risk factor 0b	No cases test allele 0 risk factor 0b	No cases test allele 1 risk factor 0b	No controls test allele 1 risk factor 0b	No cases test allele 0 risk factor 1b	No controls test allele 0 risk factor 1b	No cases test allele 1 risk factor 1b	No controls test allele 1 risk factor 1b	OR double exposure[Low - High CI]	OR test SNP [Low - High CI]	OR risk factor [Low - High CI]	AP direction	AP [Low - High CI]	AP p-value	FDR AP p-value
1	114377568	rs2476601	EIRA	risk	A	G	A	398	116	55	135	670	443	309	101	10.4[7.69-14.2]	1.37[0.94-2.01]	5.28[4.15-6.72]	Positive	0.45[0.31467-0.60263]	4.27e-10	5.24377e-05	1	114377568	rs2476601	NARAC	risk	A	j	A	553	17	7	95	555	446	219	92	57.5[32.6-101.]	1.96[0.76-5.05]	32.7[19.5-54.8]	Positive	0.41[0.22913-0.59892]	1.14e-05	0.0397731
1	114303808	rs6679677	EIRA	risk	A	C	A	393	116	55	130	669	441	284	96	9.97[7.30-13.6]	1.41[0.96-2.06]	5.22[4.10-6.65]	Positive	0.43[0.28056-0.58852]	3.18e-08	0.0019526	1	114303808	rs6679677	NARAC	risk	A	C	A	553	17	7	95	555	446	219	92	57.5[32.6-101.]	1.96[0.76-5.05]	32.7[19.5-54.8]	Positive	0.41[0.22913-0.59892]	1.14e-05	0.0397731
9	123696871	rs10739581	EIRA	risk	C	T	T	416	132	36	111	700	439	258	96	8.64[6.34-11.7]	1.02[0.66-1.56]	5.11[4.05-6.43]	Positive	0.40[0.24123-0.57080]	1.36983e-06	0.045087	9	123696871	rs10739581	NARAC	risk	C	T	C	235	6	18	413	213	218	561	320	52.1[22.4-120.]	1.50[0.57-3.92]	28.8[12.2-67.7]	Positive	0.43[0.28440-0.59007]	2.05548e-08	0.00024721
9	123696325	rs10760128	EIRA	risk	C	T	T	415	132	36	111	696	437	261	98	8.53[6.28-11.6]	1.02[0.66-1.56]	5.09[4.04-6.41]	Positive	0.40[0.23609-0.56638]	1.91625e-06	0.045087	9	123696325	rs10760128	NARAC	risk	C	T	C	230	6	18	418	210	210	564	328	50.2[21.6-116.]	1.45[0.55-3.81]	28.9[12.3-68.0]	Positive	0.41[0.25482-0.57479]	3.73638e-07	0.0024065
9	123707497	rs10985102	EIRA	risk	G	A	G	405	128	37	111	680	430	260	99	8.48[6.23-11.5]	1.04[0.68-1.59]	5.08[4.02-6.43]	Positive	0.39[0.22842-0.56214]	3.43002e-06	0.045087	9	123707497	rs10985102	NARAC	risk	G	A	G	231	6	18	417	210	210	564	328	50.3[21.7-116.]	1.46[0.56-3.82]	29.0[12.3-68.1]	Positive	0.41[0.25474-0.57471]	3.75863e-07	0.0024065
1	114096460	rs4274063	EIRA	risk	G	A	G	235	70	98	294	389	274	581	262	7.50[5.52-10.2]	1.10[0.77-1.57]	4.81[3.53-6.56]	Positive	0.34[0.19768-0.49108]	4.2e-06	0.045087	1	114096460	rs4274063	NARAC	risk	G	A	G	307	11	13	341	338	268	436	270	38.5[20.2-73.3]	1.06[0.45-2.46]	27.8[14.6-53.0]	Positive	0.27[0.08556-0.46590]	0.00448541	1
9	123706283	rs2416808	EIRA	risk	G	A	G	410	128	37	112	687	432	262	100	8.58[6.31-11.6]	1.04[0.68-1.59]	5.18[4.10-6.55]	Positive	0.39[0.22372-0.55796]	4.566e-06	0.045087	9	123706283	rs2416808	NARAC	risk	G	A	G	231	6	18	417	210	210	564	328	50.3[21.7-116.]	1.46[0.56-3.82]	29.0[12.3-68.1]	Positive	0.41[0.25474-0.57471]	3.75863e-07	0.0024065
9	123692940	rs10760127	EIRA	risk	G	C	G	420	133	37	111	716	444	260	98	8.54[6.29-11.6]	1.04[0.68-1.59]	5.17[4.11-6.50]	Positive	0.38[0.22239-0.55754]	5.0841e-06	0.045087	9	123692940	rs10760127	NARAC	risk	G	C	G	237	6	18	411	215	219	559	319	52.6[22.6-121.]	1.51[0.58-3.95]	29.0[12.3-68.0]	Positive	0.43[0.28672-0.59099]	1.56747e-08	0.00024721
9	123684000	rs7037195	EIRA	risk	T	C	T	415	131	37	113	703	438	260	99	8.48[6.24-11.5]	1.02[0.67-1.56]	5.16[4.09-6.50]	Positive	0.38[0.22073-0.55641]	5.68544e-06	0.045087	9	123684000	rs7037195	NARAC	risk	T	C	T	237	6	18	411	215	219	559	319	52.6[22.6-121.]	1.51[0.58-3.95]	29.0[12.3-68.0]	Positive	0.43[0.28672-0.59099]	1.56747e-08	0.00024721
9	123685092	rs1014530	EIRA	risk	T	C	T	420	134	37	113	717	445	260	99	8.38[6.17-11.3]	1.01[0.66-1.54]	5.12[4.07-6.44]	Positive	0.38[0.21941-0.55532]	6.16889e-06	0.045087	9	123685092	rs1014530	NARAC	risk	T	C	T	237	6	18	411	215	219	559	319	52.6[22.6-121.]	1.51[0.58-3.95]	29.0[12.3-68.0]	Positive	0.43[0.28672-0.59099]	1.56747e-08	0.00024721
9	123687905	rs1930782	EIRA	risk	C	T	C	420	134	37	113	717	445	260	99	8.38[6.17-11.3]	1.01[0.66-1.54]	5.12[4.07-6.44]	Positive	0.38[0.21941-0.55532]	6.16889e-06	0.045087	9	123687905	rs1930782	NARAC	risk	C	T	C	237	6	18	411	215	219	559	319	52.6[22.6-121.]	1.51[0.58-3.95]	29.0[12.3-68.0]	Positive	0.43[0.28672-0.59099]	1.56747e-08	0.00024721
9	123689597	rs3761846	EIRA	risk	C	T	C	420	134	37	113	717	445	260	99	8.38[6.17-11.3]	1.01[0.66-1.54]	5.12[4.07-6.44]	Positive	0.38[0.21941-0.55532]	6.16889e-06	0.045087	9	123689597	rs3761846	NARAC	risk	C	T	C	237	6	18	411	215	219	559	319	52.6[22.6-121.]	1.51[0.58-3.95]	29.0[12.3-68.0]	Positive	0.43[0.28672-0.59099]	1.56747e-08	0.00024721
1	114119751	rs11102658	EIRA	risk	C	G	C	230	68	97	289	379	267	580	262	7.56[5.55-10.3]	1.12[0.78-1.61]	4.85[3.54-6.65]	Positive	0.34[0.19309-0.48923]	6.3e-06	0.045087	1	114119751	rs11102658	NARAC	risk	C	G	C	307	11	13	341	338	268	436	270	38.5[20.2-73.3]	1.06[0.45-2.46]	27.8[14.6-53.0]	Positive	0.27[0.08556-0.46590]	0.00448541	1
9	123700183	rs10760129	EIRA	risk	T	C	T	418	133	37	112	702	439	261	100	8.36[6.16-11.3]	1.02[0.67-1.56]	5.10[4.05-6.42]	Positive	0.38[0.21899-0.55505]	6.34454e-06	0.045087	9	123700183	rs10760129	NARAC	risk	T	C	T	230	6	18	418	210	210	564	328	50.2[21.6-116.]	1.45[0.55-3.81]	28.9[12.3-68.0]	Positive	0.41[0.25482-0.57479]	3.73638e-07	0.0024065
9	123701990	rs10760130	EIRA	risk	G	A	G	418	133	37	112	702	439	261	100	8.36[6.16-11.3]	1.02[0.67-1.56]	5.10[4.05-6.42]	Positive	0.38[0.21899-0.55505]	6.34454e-06	0.045087	9	123701990	rs10760130	NARAC	risk	G	A	G	230	6	18	418	210	210	564	328	50.2[21.6-116.]	1.45[0.55-3.81]	28.9[12.3-68.0]	Positive	0.41[0.25482-0.57479]	3.73638e-07	0.0024065
1	114110901	rs1418957	EIRA	risk	A	T	A	230	68	97	290	379	267	579	262	7.55[5.54-10.2]	1.12[0.78-1.60]	4.85[3.54-6.65]	Positive	0.34[0.19210-0.48870]	6.83e-06	0.045087	1	114110901	rs1418957	NARAC	risk	A	T	A	307	11	13	341	338	268	436	270	38.5[20.2-73.3]	1.06[0.45-2.46]	27.8[14.6-53.0]	Positive	0.27[0.08556-0.46590]	0.00448541	1
1	114116889	rs12021513	EIRA	risk	T	C	T	230	68	97	290	379	267	579	262	7.55[5.54-10.2]	1.12[0.78-1.60]	4.85[3.54-6.65]	Positive	0.34[0.19205-0.48869]	6.86e-06	0.045087	1	114116889	rs12021513	NARAC	risk	T	C	T	309	11	13	339	338	269	436	269	38.8[20.4-73.8]	1.07[0.46-2.48]	27.9[14.6-53.2]	Positive	0.27[0.08800-0.46708]	0.00410376	1
1	114116845	rs12039224	EIRA	risk	G	A	G	230	68	97	290	379	267	579	262	7.55[5.54-10.2]	1.12[0.78-1.60]	4.85[3.54-6.65]	Positive	0.34[0.19205-0.48869]	6.86e-06	0.045087	1	114116845	rs12039224	NARAC	risk	G	A	G	309	11	13	339	338	269	436	269	38.8[20.4-73.8]	1.07[0.46-2.48]	27.9[14.6-53.2]	Positive	0.27[0.08800-0.46708]	0.00410376	1
9	123690239	rs3761847	EIRA	risk	G	A	G	420	134	37	113	719	445	260	99	8.38[6.18-11.3]	1.01[0.66-1.54]	5.13[4.08-6.46]	Positive	0.38[0.21758-0.55419]	6.99119e-06	0.045087	9	123690239	rs3761847	NARAC	risk	G	A	G	237	6	18	411	215	219	559	319	52.6[22.6-121.]	1.51[0.58-3.95]	29.0[12.3-68.0]	Positive	0.43[0.28672-0.59099]	1.56747e-08	0.00024721
9	123683982	rs7021049	EIRA	risk	G	T	G	414	131	37	113	699	436	263	101	8.38[6.17-11.3]	1.02[0.66-1.56]	5.14[4.07-6.48]	Positive	0.38[0.21569-0.55205]	7.68157e-06	0.045087	9	123683982	rs7021049	NARAC	risk	G	T	G	232	6	18	416	212	211	562	327	50.6[21.8-117.]	1.47[0.56-3.84]	29.0[12.3-68.3]	Positive	0.41[0.25732-0.57574]	2.92962e-07	0.0024065
1	114108711	rs6704188	EIRA	risk	A	G	A	230	68	97	290	379	267	578	262	7.54[5.53-10.2]	1.12[0.78-1.60]	4.85[3.54-6.65]	Positive	0.33[0.19054-0.48776]	7.71e-06	0.045087	1	114108711	rs6704188	NARAC	risk	A	G	A	309	11	13	339	338	269	436	269	38.8[20.4-73.8]	1.07[0.46-2.48]	27.9[14.6-53.2]	Positive	0.27[0.08800-0.46708]	0.00410376	1
9	123705087	rs10818488	EIRA	risk	A	G	A	419	133	37	111	706	441	255	98	8.37[6.16-11.3]	1.03[0.67-1.58]	5.12[4.07-6.45]	Positive	0.38[0.21346-0.55370]	9.89362e-06	0.0552064	9	123705087	rs10818488	NARAC	risk	A	G	A	235	6	18	413	213	218	561	320	52.1[22.4-120.]	1.50[0.57-3.92]	28.8[12.2-67.7]	Positive	0.43[0.28440-0.59007]	2.05548e-08	0.00024721
1	114102229	rs12043639	EIRA	risk	A	G	A	231	68	97	293	383	266	580	261	7.62[5.59-10.3]	1.11[0.78-1.59]	4.95[3.61-6.77]	Positive	0.33[0.18604-0.48459]	1.07e-05	0.057131	1	114102229	rs12043639	NARAC	risk	A	G	A	309	11	13	339	338	269	436	269	38.8[20.4-73.8]	1.07[0.46-2.48]	27.9[14.6-53.2]	Positive	0.27[0.08800-0.46708]	0.00410376	1
1	114101719	rs6689879	EIRA	risk	C	T	C	231	68	97	293	382	265	579	261	7.61[5.58-10.3]	1.11[0.77-1.59]	4.96[3.62-6.79]	Positive	0.33[0.18302-0.48295]	1.35e-05	0.0668059	1	114101719	rs6689879	NARAC	risk	C	T	C	309	11	13	339	338	269	436	269	38.8[20.4-73.8]	1.07[0.46-2.48]	27.9[14.6-53.2]	Positive	0.27[0.08800-0.46708]	0.00410376	1
1	114081002	rs10858001	EIRA	risk	C	G	C	235	70	100	296	389	273	588	269	7.40[5.45-10.0]	1.12[0.79-1.60]	4.83[3.54-6.58]	Positive	0.33[0.18154-0.47936]	1.36e-05	0.0668059	1	114081002	rs10858001	NARAC	risk	C	G	C	308	11	13	340	340	269	434	269	38.8[20.4-73.8]	1.07[0.46-2.49]	28.0[14.7-53.4]	Positive	0.27[0.08535-0.46574]	0.00451696	1
1	114080071	rs2153977	EIRA	risk	T	C	T	235	71	100	298	389	273	590	271	7.29[5.38-9.89]	1.10[0.77-1.57]	4.78[3.51-6.51]	Positive	0.33[0.18092-0.47937]	1.45e-05	0.0684874	1	114080071	rs2153977	NARAC	risk	T	C	T	308	11	13	340	340	269	434	269	38.8[20.4-73.8]	1.07[0.46-2.49]	28.0[14.7-53.4]	Positive	0.27[0.08535-0.46574]	0.00451696	1
1	114086821	rs11102651	EIRA	risk	C	T	C	235	69	100	296	388	273	587	270	7.46[5.49-10.1]	1.14[0.80-1.62]	4.88[3.57-6.66]	Positive	0.32[0.17687-0.47589]	1.88e-05	0.0855087	1	114086821	rs11102651	NARAC	risk	C	T	C	307	11	13	341	340	268	434	270	38.4[20.2-73.0]	1.06[0.45-2.46]	28.0[14.7-53.4]	Positive	0.26[0.07516-0.45966]	0.00640375	1
1	114082932	rs10858002	EIRA	risk	G	A	G	234	69	100	292	386	273	580	269	7.37[5.42-10.0]	1.15[0.80-1.64]	4.84[3.54-6.61]	Positive	0.32[0.17200-0.47324]	2.69e-05	0.117981	1	114082932	rs10858002	NARAC	risk	G	A	G	307	11	13	341	340	268	434	270	38.4[20.2-73.0]	1.06[0.45-2.46]	28.0[14.7-53.4]	Positive	0.26[0.07516-0.45966]	0.00640375	1
1	114093834	rs12037873	EIRA	risk	A	T	A	293	89	77	225	485	325	465	207	7.46[5.58-9.97]	1.10[0.77-1.57]	4.93[3.73-6.50]	Positive	0.32[0.17144-0.47840]	3.33e-05	0.141014	1	114093834	rs12037873	NARAC	risk	A	T	A	381	13	11	267	410	316	364	222	40.2[22.1-73.4]	1.15[0.49-2.68]	29.9[16.5-54.1]	Positive	0.25[0.05548-0.44967]	0.0120133	1
18	1646295	rs2345584	EIRA	risk	A	G	A	313	101	67	200	564	366	383	169	7.20[5.38-9.62]	1.02[0.71-1.46]	4.82[3.71-6.26]	Positive	0.32[0.16672-0.48675]	6.27699e-05	0.241404	18	1646295	rs2345584	NARAC	non-risk	A	G	A	379	14	10	269	443	341	331	197	37.9[21.0-68.2]	1.00[0.42-2.34]	28.6[16.1-50.9]	Positive	0.24[0.04325-0.44621]	0.017278	1
18	41178094	rs10853503	EIRA	non-risk	T	C	C	63	15	149	448	92	87	850	446	8.01[4.50-14.2]	1.37[0.75-2.48]	4.49[2.37-8.49]	Positive	0.39[0.19692-0.58797]	8.35376e-05	0.241404	18	41178094	rs10853503	NARAC	non-risk	T	C	T	241	9	15	407	265	207	509	331	38.0[18.7-77.0]	1.13[0.47-2.70]	29.6[14.4-60.8]	Positive	0.21[0.00428-0.42643]	0.0455271	1
1	114222591	rs1230655	EIRA	risk	A	T	A	294	84	85	232	467	316	498	221	7.92[5.92-10.6]	1.26[0.88-1.79]	5.22[3.93-6.93]	Positive	0.30[0.15396-0.46155]	8.77e-05	0.241404	1	114222591	rs1230655	NARAC	risk	A	T	A	367	12	12	281	381	298	393	240	41.3[22.2-76.7]	1.21[0.52-2.81]	30.3[16.4-56.1]	Positive	0.26[0.06749-0.45434]	0.00819396	1
1	114160758	rs11102661	EIRA	risk	A	G	A	291	85	82	227	470	318	484	217	7.71[5.76-10.3]	1.21[0.85-1.73]	5.11[3.85-6.78]	Positive	0.30[0.15371-0.46353]	9.43e-05	0.241404	1	114160758	rs11102661	NARAC	risk	A	G	A	374	12	12	274	395	305	379	233	41.9[22.5-77.8]	1.27[0.55-2.95]	31.4[17.0-58.1]	Positive	0.24[0.04418-0.44089]	0.0165496	1
1	114162194	rs1217192	EIRA	risk	G	A	G	291	85	82	227	470	318	484	217	7.71[5.76-10.3]	1.21[0.85-1.73]	5.11[3.85-6.78]	Positive	0.30[0.15371-0.46353]	9.43e-05	0.241404	1	114162194	rs1217192	NARAC	risk	G	A	G	374	12	12	274	395	305	379	233	41.9[22.5-77.8]	1.27[0.55-2.95]	31.4[17.0-58.1]	Positive	0.24[0.04418-0.44089]	0.0165496	1
1	114162619	rs1217193	EIRA	risk	C	G	C	291	85	82	227	470	318	484	217	7.71[5.76-10.3]	1.21[0.85-1.73]	5.11[3.85-6.78]	Positive	0.30[0.15371-0.46353]	9.43e-05	0.241404	1	114162619	rs1217193	NARAC	risk	C	G	C	374	12	12	274	395	305	379	233	41.9[22.5-77.8]	1.27[0.55-2.95]	31.4[17.0-58.1]	Positive	0.24[0.04418-0.44089]	0.0165496	1
1	114161116	rs1217200	EIRA	risk	C	A	C	291	85	82	227	470	318	484	217	7.71[5.76-10.3]	1.21[0.85-1.73]	5.11[3.85-6.78]	Positive	0.30[0.15371-0.46353]	9.43e-05	0.241404	1	114161116	rs1217200	NARAC	risk	C	A	C	374	12	12	274	395	305	379	233	41.9[22.5-77.8]	1.27[0.55-2.95]	31.4[17.0-58.1]	Positive	0.24[0.04418-0.44089]	0.0165496	1
1	114164508	rs12565589	EIRA	risk	A	G	A	291	85	82	227	470	318	484	217	7.71[5.76-10.3]	1.21[0.85-1.73]	5.11[3.85-6.78]	Positive	0.30[0.15371-0.46353]	9.43e-05	0.241404	1	114164508	rs12565589	NARAC	risk	A	G	A	374	12	12	274	395	305	379	233	41.9[22.5-77.8]	1.27[0.55-2.95]	31.4[17.0-58.1]	Positive	0.24[0.04418-0.44089]	0.0165496	1
1	114171796	rs2798138	EIRA	risk	A	C	A	293	83	83	228	466	313	494	219	8.05[6.01-10.7]	1.26[0.89-1.80]	5.31[4.00-7.06]	Positive	0.30[0.15248-0.46154]	9.86e-05	0.241404	1	114171796	rs2798138	NARAC	risk	A	C	A	374	12	12	274	395	305	379	233	41.9[22.5-77.8]	1.27[0.55-2.95]	31.4[17.0-58.1]	Positive	0.24[0.04418-0.44089]	0.0165496	1
18	41178765	rs9944584	EIRA	risk	A	G	G	64	15	149	447	92	87	847	446	8.12[4.56-14.4]	1.40[0.77-2.53]	4.57[2.42-8.63]	Positive	0.38[0.19180-0.58359]	0.000104855	0.241404	18	41178765	rs9944584	NARAC	non-risk	A	G	A	241	9	15	407	265	207	509	331	38.0[18.7-77.0]	1.13[0.47-2.70]	29.6[14.4-60.8]	Positive	0.21[0.00428-0.42643]	0.0455271	1
1	114114537	rs11102657	EIRA	risk	T	A	T	293	87	76	221	479	318	466	209	7.59[5.67-10.1]	1.14[0.80-1.63]	5.09[3.85-6.73]	Positive	0.30[0.15315-0.46638]	0.000105848	0.241404	1	114114537	rs11102657	NARAC	risk	T	A	T	383	13	11	265	410	317	364	221	40.5[22.2-73.8]	1.16[0.49-2.70]	30.0[16.6-54.2]	Positive	0.25[0.05795-0.45105]	0.0111509	1
1	114119620	rs10858008	EIRA	risk	T	C	T	292	87	79	224	480	318	474	212	7.59[5.67-10.1]	1.16[0.81-1.66]	5.09[3.84-6.73]	Positive	0.30[0.15146-0.46387]	0.000113124	0.241404	1	114119620	rs10858008	NARAC	risk	T	C	T	381	13	11	267	410	316	364	222	40.2[22.1-73.4]	1.15[0.49-2.68]	29.9[16.5-54.1]	Positive	0.25[0.05548-0.44967]	0.0120133	1
2	207977132	rs1263628	EIRA	risk	C	G	G	22	6	160	506	13	19	954	515	7.07[2.81-17.7]	1.18[0.46-3.01]	2.67[0.84-8.50]	Positive	0.59[0.29294-0.89756]	0.000113725	0.241404	2	207977132	rs1263628	NARAC	risk	C	G	C	486	14	10	162	517	410	257	128	57.0[31.3-103.]	2.35[1.00-5.56]	37.4[21.2-66.1]	Positive	0.31[0.12282-0.51531]	0.00143902	1
14	59567470	rs61985977	EIRA	non-risk	A	G	G	498	158	7	16	919	520	38	8	15.7[7.16-34.4]	1.44[0.58-3.58]	5.66[4.59-6.99]	Positive	0.61[0.30039-0.92216]	0.000116274	0.241404	14	59567470	rs61985977	NARAC	non-risk	A	G	A	384	10	14	264	422	311	352	227	64.5[32.7-127.]	2.85[1.21-6.70]	44.8[23.0-87.4]	Positive	0.27[0.09334-0.45845]	0.00305475	1
1	114119237	rs10858007	EIRA	risk	G	A	G	298	87	80	224	487	322	476	212	7.79[5.82-10.4]	1.20[0.84-1.71]	5.20[3.94-6.88]	Positive	0.30[0.14944-0.46087]	0.000122526	0.241404	1	114119237	rs10858007	NARAC	risk	G	A	G	381	13	11	267	410	316	364	222	40.2[22.1-73.4]	1.15[0.49-2.68]	29.9[16.5-54.1]	Positive	0.25[0.05548-0.44967]	0.0120133	1
1	114170837	rs1777234	EIRA	risk	A	T	A	284	80	83	228	458	300	493	213	8.33[6.19-11.2]	1.28[0.90-1.83]	5.50[4.12-7.35]	Positive	0.30[0.14924-0.46153]	0.000126401	0.241404	1	114170837	rs1777234	NARAC	risk	A	T	A	374	12	12	274	395	305	379	233	41.9[22.5-77.8]	1.27[0.55-2.95]	31.4[17.0-58.1]	Positive	0.24[0.04418-0.44089]	0.0165496	1
1	114084544	rs4456089	EIRA	risk	T	C	T	301	88	81	228	493	328	480	215	7.69[5.76-10.2]	1.19[0.84-1.69]	5.16[3.91-6.81]	Positive	0.30[0.14790-0.45813]	0.000128721	0.241404	1	114084544	rs4456089	NARAC	risk	T	C	T	382	13	11	266	412	316	362	222	40.0[21.9-73.0]	1.15[0.49-2.68]	30.1[16.6-54.4]	Positive	0.24[0.04505-0.44349]	0.0162516	1
1	114317791	rs1935838	EIRA	risk	T	C	T	284	83	81	223	454	307	482	216	7.68[5.72-10.3]	1.21[0.85-1.73]	5.10[3.83-6.79]	Positive	0.30[0.14988-0.46432]	0.000128898	0.241404	1	114317791	rs1935838	NARAC	risk	T	C	T	372	12	12	276	395	307	379	231	42.1[22.6-78.3]	1.26[0.54-2.94]	31.2[16.9-57.7]	Positive	0.25[0.05595-0.44797]	0.0117521	1
1	114139922	rs1217226	EIRA	risk	C	T	C	301	87	79	218	501	330	461	203	7.93[5.92-10.6]	1.22[0.86-1.75]	5.28[4.00-6.97]	Positive	0.30[0.14899-0.46173]	0.000129459	0.241404	1	114139922	rs1217226	NARAC	risk	C	T	C	382	13	11	266	411	315	363	223	39.8[21.8-72.5]	1.14[0.49-2.66]	30.1[16.6-54.3]	Positive	0.24[0.04062-0.44112]	0.0183939	1
1	114095339	rs12074958	EIRA	risk	G	A	G	303	89	82	230	497	328	482	215	7.70[5.77-10.2]	1.18[0.83-1.68]	5.18[3.93-6.82]	Positive	0.30[0.14761-0.45787]	0.000130738	0.241404	1	114095339	rs12074958	NARAC	risk	G	A	G	381	13	11	267	410	316	364	222	40.2[22.1-73.4]	1.15[0.49-2.68]	29.9[16.5-54.1]	Positive	0.25[0.05548-0.44967]	0.0120133	1
1	114173800	rs1217210	EIRA	risk	G	C	G	296	84	84	230	474	317	496	220	8.02[5.99-10.7]	1.26[0.89-1.80]	5.33[4.01-7.07]	Positive	0.30[0.14727-0.45691]	0.000131056	0.241404	1	114173800	rs1217210	NARAC	risk	G	C	G	374	12	12	274	395	305	379	233	41.9[22.5-77.8]	1.27[0.55-2.95]	31.4[17.0-58.1]	Positive	0.24[0.04418-0.44089]	0.0165496	1
1	114290959	rs1230687	EIRA	risk	A	T	A	291	83	84	236	468	314	499	223	7.88[5.88-10.5]	1.22[0.86-1.74]	5.28[3.97-7.01]	Positive	0.30[0.14638-0.45660]	0.000139106	0.241404	1	114290959	rs1230687	NARAC	risk	A	T	A	370	12	12	278	395	307	379	231	41.9[22.6-78.0]	1.25[0.54-2.92]	31.1[16.8-57.5]	Positive	0.25[0.05619-0.44818]	0.0116692	1
1	114166835	rs2798135	EIRA	risk	G	T	G	296	83	84	229	473	317	496	220	8.12[6.06-10.8]	1.29[0.90-1.83]	5.38[4.05-7.15]	Positive	0.30[0.14609-0.45587]	0.00013964	0.241404	1	114166835	rs2798135	NARAC	risk	G	T	G	374	12	12	274	395	305	379	233	41.9[22.5-77.8]	1.27[0.55-2.95]	31.4[17.0-58.1]	Positive	0.24[0.04418-0.44089]	0.0165496	1
1	114135346	rs1217234	EIRA	risk	C	G	C	298	87	81	224	487	322	476	212	7.78[5.82-10.4]	1.21[0.85-1.73]	5.20[3.94-6.88]	Positive	0.30[0.14700-0.45911]	0.000141052	0.241404	1	114135346	rs1217234	NARAC	risk	C	G	C	382	13	11	266	411	315	363	223	40.0[21.9-72.8]	1.15[0.49-2.69]	30.2[16.7-54.6]	Positive	0.24[0.04054-0.44067]	0.0184122	1
1	114134977	rs1217235	EIRA	risk	T	G	T	298	87	81	224	487	322	476	212	7.78[5.82-10.4]	1.21[0.85-1.73]	5.20[3.94-6.88]	Positive	0.30[0.14700-0.45911]	0.000141052	0.241404	1	114134977	rs1217235	NARAC	risk	T	G	T	382	13	11	266	410	315	364	223	40.1[22.0-73.0]	1.15[0.49-2.69]	30.1[16.6-54.5]	Positive	0.24[0.04491-0.44313]	0.016298	1
1	114131740	rs1217237	EIRA	risk	T	G	T	298	87	81	224	487	322	476	212	7.78[5.82-10.4]	1.21[0.85-1.73]	5.20[3.94-6.88]	Positive	0.30[0.14700-0.45911]	0.000141052	0.241404	1	114131740	rs1217237	NARAC	risk	T	G	T	382	13	11	266	410	315	364	223	40.1[22.0-73.0]	1.15[0.49-2.69]	30.1[16.6-54.5]	Positive	0.24[0.04491-0.44313]	0.016298	1
1	114147381	rs1217214	EIRA	risk	G	C	G	298	87	81	224	489	323	476	212	7.78[5.82-10.4]	1.21[0.85-1.73]	5.21[3.94-6.89]	Positive	0.30[0.14602-0.45830]	0.000148848	0.241404	1	114147381	rs1217214	NARAC	risk	G	C	G	383	12	12	265	410	316	364	222	43.4[23.3-80.6]	1.35[0.58-3.14]	32.4[17.5-59.7]	Positive	0.24[0.04633-0.44333]	0.0156244	1
1	114147865	rs1237289	EIRA	risk	G	A	G	298	87	81	224	489	323	476	212	7.78[5.82-10.4]	1.21[0.85-1.73]	5.21[3.94-6.89]	Positive	0.30[0.14602-0.45830]	0.000148848	0.241404	1	114147865	rs1237289	NARAC	risk	G	A	G	381	12	12	267	410	315	364	223	43.1[23.2-80.2]	1.34[0.57-3.11]	32.3[17.5-59.6]	Positive	0.24[0.04385-0.44195]	0.0167661	1
1	114129474	rs1113523	EIRA	risk	A	G	A	298	86	81	223	486	322	476	212	7.88[5.89-10.5]	1.23[0.87-1.76]	5.26[3.97-6.95]	Positive	0.30[0.14590-0.45812]	0.000149469	0.241404	1	114129474	rs1113523	NARAC	risk	A	G	A	381	13	11	267	410	315	364	223	40.0[21.9-72.9]	1.15[0.49-2.68]	30.1[16.6-54.4]	Positive	0.24[0.04503-0.44326]	0.0162473	1
1	114125259	rs1217203	EIRA	risk	A	G	A	298	86	81	223	486	322	476	212	7.88[5.89-10.5]	1.23[0.87-1.76]	5.26[3.97-6.95]	Positive	0.30[0.14590-0.45812]	0.000149469	0.241404	1	114125259	rs1217203	NARAC	risk	A	G	A	381	13	11	267	410	315	364	223	40.0[21.9-72.9]	1.15[0.49-2.68]	30.1[16.6-54.4]	Positive	0.24[0.04503-0.44326]	0.0162473	1
1	114136037	rs1217232	EIRA	risk	C	T	C	298	86	81	223	486	322	476	212	7.88[5.89-10.5]	1.23[0.87-1.76]	5.26[3.97-6.95]	Positive	0.30[0.14590-0.45812]	0.000149469	0.241404	1	114136037	rs1217232	NARAC	risk	C	T	C	383	13	11	265	411	315	363	223	40.0[21.9-72.9]	1.16[0.49-2.70]	30.2[16.7-54.6]	Positive	0.24[0.04037-0.44064]	0.0185051	1
1	114135708	rs1217233	EIRA	risk	G	T	G	298	86	81	223	486	322	476	212	7.88[5.89-10.5]	1.23[0.87-1.76]	5.26[3.97-6.95]	Positive	0.30[0.14590-0.45812]	0.000149469	0.241404	1	114135708	rs1217233	NARAC	risk	G	T	G	383	13	11	265	411	315	363	223	40.0[21.9-72.9]	1.16[0.49-2.70]	30.2[16.7-54.6]	Positive	0.24[0.04037-0.44064]	0.0185051	1
1	114132712	rs1217236	EIRA	risk	G	A	G	298	86	81	223	486	322	476	212	7.88[5.89-10.5]	1.23[0.87-1.76]	5.26[3.97-6.95]	Positive	0.30[0.14590-0.45812]	0.000149469	0.241404	1	114132712	rs1217236	NARAC	risk	G	A	G	382	13	11	266	410	315	364	223	40.1[22.0-73.0]	1.15[0.49-2.69]	30.1[16.6-54.5]	Positive	0.24[0.04491-0.44313]	0.016298	1
1	114126107	rs1235687	EIRA	risk	G	T	G	298	86	81	223	486	322	476	212	7.88[5.89-10.5]	1.23[0.87-1.76]	5.26[3.97-6.95]	Positive	0.30[0.14590-0.45812]	0.000149469	0.241404	1	114126107	rs1235687	NARAC	risk	G	T	G	381	13	11	267	410	315	364	223	40.0[21.9-72.9]	1.15[0.49-2.68]	30.1[16.6-54.4]	Positive	0.24[0.04503-0.44326]	0.0162473	1
1	114075796	rs10858000	EIRA	risk	T	C	T	300	89	81	229	495	328	479	215	7.56[5.67-10.0]	1.17[0.82-1.66]	5.10[3.87-6.73]	Positive	0.30[0.14549-0.45712]	0.000150541	0.241404	1	114075796	rs10858000	NARAC	risk	T	C	T	384	13	11	264	411	318	363	220	40.8[22.4-74.4]	1.17[0.50-2.73]	30.1[16.6-54.4]	Positive	0.25[0.06209-0.45372]	0.00983682	1
1	114088416	rs10745339	EIRA	risk	G	A	G	302	88	81	229	495	328	480	215	7.71[5.78-10.2]	1.19[0.84-1.69]	5.20[3.94-6.85]	Positive	0.30[0.14512-0.45624]	0.000151539	0.241404	1	114088416	rs10745339	NARAC	risk	G	A	G	384	13	11	264	412	317	362	221	40.3[22.1-73.4]	1.16[0.49-2.70]	30.2[16.7-54.5]	Positive	0.24[0.04754-0.44489]	0.0151378	1
1	114089316	rs17013326	EIRA	risk	A	G	A	302	88	81	229	495	328	480	215	7.71[5.78-10.2]	1.19[0.84-1.69]	5.20[3.94-6.85]	Positive	0.30[0.14512-0.45624]	0.000151539	0.241404	1	114089316	rs17013326	NARAC	risk	A	G	A	384	13	11	264	412	317	362	221	40.3[22.1-73.4]	1.16[0.49-2.70]	30.2[16.7-54.5]	Positive	0.24[0.04754-0.44489]	0.0151378	1
1	114196883	rs1146182	EIRA	risk	C	A	C	297	84	85	231	474	318	496	221	8.01[5.99-10.7]	1.28[0.90-1.82]	5.32[4.01-7.06]	Positive	0.29[0.14461-0.45468]	0.000151738	0.241404	1	114196883	rs1146182	NARAC	risk	C	A	C	374	12	12	274	395	305	379	233	41.9[22.5-77.8]	1.27[0.55-2.95]	31.4[17.0-58.1]	Positive	0.24[0.04418-0.44089]	0.0165496	1
1	114111036	rs1343125	EIRA	risk	G	A	G	298	87	80	224	487	322	474	212	7.75[5.80-10.3]	1.20[0.84-1.71]	5.20[3.94-6.88]	Positive	0.30[0.14566-0.45857]	0.000153794	0.241404	1	114111036	rs1343125	NARAC	risk	G	A	G	381	13	11	267	410	316	364	222	40.2[22.1-73.4]	1.15[0.49-2.68]	29.9[16.5-54.1]	Positive	0.25[0.05548-0.44967]	0.0120133	1
1	114110836	rs1418958	EIRA	risk	T	A	T	298	87	80	224	487	322	474	212	7.75[5.80-10.3]	1.20[0.84-1.71]	5.20[3.94-6.88]	Positive	0.30[0.14566-0.45857]	0.000153794	0.241404	1	114110836	rs1418958	NARAC	risk	T	A	T	381	13	11	267	410	316	364	222	40.2[22.1-73.4]	1.15[0.49-2.68]	29.9[16.5-54.1]	Positive	0.25[0.05548-0.44967]	0.0120133	1
1	114207314	rs1743605	EIRA	risk	G	T	G	296	83	83	230	473	318	497	222	8.04[6.00-10.7]	1.26[0.89-1.80]	5.37[4.04-7.12]	Positive	0.29[0.14435-0.45451]	0.000154076	0.241404	1	114207314	rs1743605	NARAC	risk	G	T	G	374	12	12	274	395	305	379	233	41.9[22.5-77.8]	1.27[0.55-2.95]	31.4[17.0-58.1]	Positive	0.24[0.04418-0.44089]	0.0165496	1
1	114146334	rs1217215	EIRA	risk	C	A	C	299	87	81	223	490	324	467	208	7.82[5.84-10.4]	1.22[0.86-1.74]	5.22[3.95-6.90]	Positive	0.30[0.14594-0.45957]	0.000154192	0.241404	1	114146334	rs1217215	NARAC	risk	C	A	C	383	12	12	265	410	316	364	222	43.4[23.3-80.6]	1.35[0.58-3.14]	32.4[17.5-59.7]	Positive	0.24[0.04633-0.44333]	0.0156244	1
1	114233871	rs4839335	EIRA	risk	G	A	G	300	85	86	233	476	320	503	224	7.96[5.96-10.6]	1.28[0.90-1.81]	5.30[4.00-7.02]	Positive	0.29[0.14377-0.45295]	0.000154984	0.241404	1	114233871	rs4839335	NARAC	risk	G	A	G	373	12	12	275	395	305	379	233	41.9[22.5-77.8]	1.27[0.54-2.95]	31.4[17.0-58.1]	Positive	0.24[0.04423-0.44092]	0.0165237	1
1	114094286	rs11102652	EIRA	risk	T	C	T	303	89	82	229	497	328	481	215	7.68[5.76-10.2]	1.19[0.84-1.69]	5.18[3.93-6.82]	Positive	0.30[0.14465-0.45605]	0.000156257	0.241404	1	114094286	rs11102652	NARAC	risk	T	C	T	381	13	11	267	410	316	364	222	40.2[22.1-73.4]	1.15[0.49-2.68]	29.9[16.5-54.1]	Positive	0.25[0.05548-0.44967]	0.0120133	1
1	114114843	rs2884703	EIRA	risk	A	G	A	292	85	80	220	473	312	474	211	7.82[5.83-10.4]	1.23[0.86-1.75]	5.22[3.93-6.92]	Positive	0.30[0.14578-0.46020]	0.000158348	0.241404	1	114114843	rs2884703	NARAC	risk	A	G	A	383	13	11	265	410	317	364	221	40.5[22.2-73.8]	1.16[0.49-2.70]	30.0[16.6-54.2]	Positive	0.25[0.05795-0.45105]	0.0111509	1
1	114076435	rs11102648	EIRA	risk	A	C	A	296	86	80	228	493	324	479	213	7.78[5.82-10.4]	1.18[0.83-1.69]	5.25[3.97-6.94]	Positive	0.30[0.14458-0.45683]	0.000159971	0.241404	1	114076435	rs11102648	NARAC	risk	A	C	A	378	13	11	270	404	313	370	225	39.3[21.5-71.5]	1.11[0.47-2.59]	29.7[16.4-53.7]	Positive	0.24[0.04161-0.44064]	0.017847	1
1	114126220	rs1217204	EIRA	risk	G	C	G	297	86	81	222	485	320	476	211	7.87[5.88-10.5]	1.24[0.87-1.76]	5.26[3.98-6.96]	Positive	0.30[0.14464-0.45768]	0.000162411	0.241404	1	114126220	rs1217204	NARAC	risk	G	C	G	381	13	11	267	410	315	364	223	40.0[21.9-72.9]	1.15[0.49-2.68]	30.1[16.6-54.4]	Positive	0.24[0.04503-0.44326]	0.0162473	1
1	114096097	rs12035317	EIRA	risk	G	T	G	303	89	82	230	497	328	482	216	7.66[5.75-10.2]	1.19[0.83-1.68]	5.18[3.93-6.82]	Positive	0.29[0.14368-0.45513]	0.000164266	0.241404	1	114096097	rs12035317	NARAC	risk	G	T	G	381	13	11	267	410	316	364	222	40.2[22.1-73.4]	1.15[0.49-2.68]	29.9[16.5-54.1]	Positive	0.25[0.05548-0.44967]	0.0120133	1
1	114157788	rs1217199	EIRA	risk	C	T	C	291	87	79	223	482	319	470	211	7.54[5.63-10.0]	1.16[0.81-1.66]	5.09[3.84-6.73]	Positive	0.30[0.14510-0.45998]	0.000165633	0.241404	1	114157788	rs1217199	NARAC	risk	C	T	C	383	12	12	265	410	316	364	222	43.4[23.3-80.6]	1.35[0.58-3.14]	32.4[17.5-59.7]	Positive	0.24[0.04633-0.44333]	0.0156244	1
7	88547866	rs17301014	EIRA	risk	G	A	A	38	10	148	475	42	44	891	476	7.37[3.62-14.9]	1.21[0.58-2.50]	3.70[1.63-8.41]	Positive	0.46[0.22447-0.71186]	0.00016629	0.241404	7	88547866	rs17301014	NARAC	non-risk	G	A	G	340	9	15	308	403	306	371	232	56.2[27.8-113.]	2.07[0.87-4.93]	41.1[20.4-82.7]	Positive	0.25[0.05515-0.44516]	0.0119258	1
1	114148921	rs10858011	EIRA	risk	A	G	A	298	87	81	224	489	323	475	212	7.77[5.81-10.3]	1.21[0.85-1.73]	5.21[3.94-6.89]	Positive	0.30[0.14386-0.45704]	0.00016936	0.241404	1	114148921	rs10858011	NARAC	risk	A	G	A	383	12	12	265	410	316	364	222	43.4[23.3-80.6]	1.35[0.58-3.14]	32.4[17.5-59.7]	Positive	0.24[0.04633-0.44333]	0.0156244	1
1	114105476	rs7536360	EIRA	risk	C	A	C	299	87	80	224	489	322	475	212	7.79[5.83-10.4]	1.20[0.84-1.71]	5.24[3.97-6.93]	Positive	0.30[0.14352-0.45696]	0.000173361	0.241404	1	114105476	rs7536360	NARAC	risk	C	A	C	381	13	11	267	410	316	364	222	40.2[22.1-73.4]	1.15[0.49-2.68]	29.9[16.5-54.1]	Positive	0.25[0.05548-0.44967]	0.0120133	1
1	114109621	rs10858005	EIRA	risk	T	G	T	298	87	80	224	487	322	473	212	7.74[5.78-10.3]	1.20[0.84-1.71]	5.20[3.94-6.88]	Positive	0.30[0.14348-0.45729]	0.000175181	0.241404	1	114109621	rs10858005	NARAC	risk	T	G	T	383	13	11	265	410	317	364	221	40.5[22.2-73.8]	1.16[0.49-2.70]	30.0[16.6-54.2]	Positive	0.25[0.05795-0.45105]	0.0111509	1
1	114108252	rs1343128	EIRA	risk	A	G	A	298	87	80	224	487	322	473	212	7.74[5.78-10.3]	1.20[0.84-1.71]	5.20[3.94-6.88]	Positive	0.30[0.14348-0.45729]	0.000175181	0.241404	1	114108252	rs1343128	NARAC	risk	A	G	A	383	13	11	265	410	317	364	221	40.5[22.2-73.8]	1.16[0.49-2.70]	30.0[16.6-54.2]	Positive	0.25[0.05795-0.45105]	0.0111509	1
1	114106923	rs12077419	EIRA	risk	A	T	A	299	87	80	224	487	322	473	212	7.76[5.81-10.3]	1.21[0.85-1.72]	5.22[3.95-6.90]	Positive	0.30[0.14313-0.45701]	0.000178548	0.241404	1	114106923	rs12077419	NARAC	risk	A	T	A	383	13	11	265	410	317	364	221	40.5[22.2-73.8]	1.16[0.49-2.70]	30.0[16.6-54.2]	Positive	0.25[0.05795-0.45105]	0.0111509	1
1	114106807	rs72687980	EIRA	risk	T	C	T	299	87	80	224	487	322	473	212	7.76[5.81-10.3]	1.21[0.85-1.72]	5.22[3.95-6.90]	Positive	0.30[0.14313-0.45701]	0.000178548	0.241404	1	114106807	rs72687980	NARAC	risk	T	C	T	383	13	11	265	410	317	364	221	40.5[22.2-73.8]	1.16[0.49-2.70]	30.0[16.6-54.2]	Positive	0.25[0.05795-0.45105]	0.0111509	1
1	114149792	rs1217211	EIRA	risk	A	T	A	298	86	81	223	488	323	475	212	7.86[5.87-10.5]	1.24[0.87-1.76]	5.26[3.98-6.96]	Positive	0.29[0.14275-0.45603]	0.000179563	0.241404	1	114149792	rs1217211	NARAC	risk	A	T	A	383	12	12	265	410	316	364	222	43.4[23.3-80.6]	1.35[0.58-3.14]	32.4[17.5-59.7]	Positive	0.24[0.04633-0.44333]	0.0156244	1
1	114140889	rs1217223	EIRA	risk	A	G	A	298	86	81	223	488	322	476	212	7.88[5.88-10.5]	1.24[0.87-1.76]	5.28[3.99-6.98]	Positive	0.29[0.14227-0.45563]	0.000184145	0.241404	1	114140889	rs1217223	NARAC	risk	A	G	A	382	13	11	266	411	315	363	223	39.8[21.8-72.5]	1.14[0.49-2.66]	30.1[16.6-54.3]	Positive	0.24[0.04062-0.44112]	0.0183939	1
1	114139616	rs1217227	EIRA	risk	C	T	C	298	86	81	223	488	322	476	212	7.88[5.88-10.5]	1.24[0.87-1.76]	5.28[3.99-6.98]	Positive	0.29[0.14227-0.45563]	0.000184145	0.241404	1	114139616	rs1217227	NARAC	risk	C	T	C	382	13	11	266	411	315	363	223	39.8[21.8-72.5]	1.14[0.49-2.66]	30.1[16.6-54.3]	Positive	0.24[0.04062-0.44112]	0.0183939	1
1	114141492	rs1235688	EIRA	risk	C	T	C	298	86	81	223	488	322	476	212	7.88[5.88-10.5]	1.24[0.87-1.76]	5.28[3.99-6.98]	Positive	0.29[0.14227-0.45563]	0.000184145	0.241404	1	114141492	rs1235688	NARAC	risk	C	T	C	382	13	11	266	411	315	363	223	39.8[21.8-72.5]	1.14[0.49-2.66]	30.1[16.6-54.3]	Positive	0.24[0.04062-0.44112]	0.0183939	1
1	114139359	rs1217228	EIRA	risk	T	G	T	298	86	80	223	488	321	476	212	7.88[5.89-10.5]	1.22[0.86-1.74]	5.30[4.00-7.01]	Positive	0.29[0.14206-0.45569]	0.000187283	0.241404	1	114139359	rs1217228	NARAC	risk	T	G	T	382	13	11	266	411	315	363	223	39.8[21.8-72.5]	1.14[0.49-2.66]	30.1[16.6-54.3]	Positive	0.24[0.04062-0.44112]	0.0183939	1
1	114187371	rs1777237	EIRA	risk	G	A	G	297	84	85	230	474	317	496	221	8.01[5.98-10.7]	1.28[0.90-1.82]	5.34[4.03-7.09]	Positive	0.29[0.14077-0.45223]	0.000190083	0.241404	1	114187371	rs1777237	NARAC	risk	G	A	G	374	12	12	274	395	305	379	233	41.9[22.5-77.8]	1.27[0.55-2.95]	31.4[17.0-58.1]	Positive	0.24[0.04418-0.44089]	0.0165496	1
1	114368777	rs10858021	EIRA	risk	G	T	G	285	85	84	230	464	307	496	220	7.59[5.67-10.1]	1.19[0.84-1.70]	5.12[3.85-6.79]	Positive	0.29[0.14217-0.45704]	0.00019151	0.241404	1	114368777	rs10858021	NARAC	risk	G	T	G	371	12	12	277	391	305	383	233	42.2[22.7-78.4]	1.26[0.54-2.93]	31.1[16.8-57.4]	Positive	0.25[0.06256-0.45163]	0.00958934	1
1	114262561	rs2636014	EIRA	risk	T	C	T	297	85	86	233	472	318	500	224	7.84[5.87-10.4]	1.27[0.89-1.79]	5.25[3.96-6.96]	Positive	0.29[0.14020-0.45147]	0.000194781	0.241404	1	114262561	rs2636014	NARAC	risk	T	C	T	373	12	12	275	395	306	379	232	42.2[22.7-78.4]	1.27[0.54-2.95]	31.3[16.9-57.8]	Positive	0.25[0.05581-0.44794]	0.0118038	1
1	114123773	rs1217201	EIRA	risk	G	A	G	298	86	81	223	484	319	476	212	7.88[5.89-10.5]	1.24[0.87-1.76]	5.29[3.99-6.99]	Positive	0.29[0.14137-0.45544]	0.000195643	0.241404	1	114123773	rs1217201	NARAC	risk	G	A	G	381	13	11	267	410	315	364	223	40.0[21.9-72.9]	1.15[0.49-2.68]	30.1[16.6-54.4]	Positive	0.24[0.04503-0.44326]	0.0162473	1
1	114225306	rs4838997	EIRA	risk	G	A	G	300	85	85	232	475	320	499	224	7.90[5.92-10.5]	1.27[0.89-1.80]	5.29[4.00-7.01]	Positive	0.29[0.13992-0.45088]	0.000196208	0.241404	1	114225306	rs4838997	NARAC	risk	G	A	G	374	12	12	274	395	305	379	233	41.9[22.5-77.8]	1.27[0.55-2.95]	31.4[17.0-58.1]	Positive	0.24[0.04418-0.44089]	0.0165496	1
1	114297775	rs1230679	EIRA	risk	A	T	A	296	85	85	231	476	319	501	224	7.82[5.85-10.4]	1.26[0.88-1.78]	5.25[3.96-6.96]	Positive	0.29[0.13928-0.45068]	0.000204515	0.241404	1	114297775	rs1230679	NARAC	risk	A	T	A	372	12	12	276	395	307	379	231	42.1[22.6-78.3]	1.26[0.54-2.94]	31.2[16.9-57.7]	Positive	0.25[0.05595-0.44797]	0.0117521	1
1	114182622	rs1777241	EIRA	risk	G	A	G	297	83	85	230	473	317	495	221	8.09[6.04-10.8]	1.30[0.91-1.85]	5.39[4.06-7.16]	Positive	0.29[0.13936-0.45108]	0.000205107	0.241404	1	114182622	rs1777241	NARAC	risk	G	A	G	374	12	12	274	395	305	379	233	41.9[22.5-77.8]	1.27[0.55-2.95]	31.4[17.0-58.1]	Positive	0.24[0.04418-0.44089]	0.0165496	1
1	114262556	rs2636013	EIRA	risk	G	C	G	297	85	86	233	472	316	500	223	7.88[5.90-10.5]	1.27[0.89-1.80]	5.28[3.98-7.00]	Positive	0.29[0.13908-0.45097]	0.000208773	0.241404	1	114262556	rs2636013	NARAC	risk	G	C	G	373	12	12	275	395	306	379	232	42.2[22.7-78.4]	1.27[0.54-2.95]	31.3[16.9-57.8]	Positive	0.25[0.05581-0.44794]	0.0118038	1
1	114138534	rs1217230	EIRA	risk	A	T	A	298	86	81	223	488	322	475	212	7.86[5.87-10.5]	1.24[0.87-1.76]	5.28[3.99-6.98]	Positive	0.29[0.14008-0.45434]	0.000209404	0.241404	1	114138534	rs1217230	NARAC	risk	A	T	A	382	13	11	266	411	315	363	223	39.8[21.8-72.5]	1.14[0.49-2.66]	30.1[16.6-54.3]	Positive	0.24[0.04062-0.44112]	0.0183939	1
18	1652063	rs2045113	EIRA	risk	A	G	A	327	103	68	205	591	373	386	170	7.36[5.52-9.82]	1.04[0.72-1.48]	5.06[3.91-6.55]	Positive	0.30[0.14444-0.46927]	0.000212939	0.241404	18	1652063	rs2045113	NARAC	non-risk	A	G	A	382	14	10	266	446	343	328	195	37.9[21.0-68.2]	1.01[0.43-2.37]	28.9[16.2-51.3]	Positive	0.23[0.03431-0.44160]	0.0220054	1
18	1652068	rs2045115	EIRA	risk	A	G	A	327	103	68	205	591	373	386	170	7.36[5.52-9.82]	1.04[0.72-1.48]	5.06[3.91-6.55]	Positive	0.30[0.14444-0.46927]	0.000212939	0.241404	18	1652068	rs2045115	NARAC	non-risk	A	G	A	382	14	10	266	446	343	328	195	37.9[21.0-68.2]	1.01[0.43-2.37]	28.9[16.2-51.3]	Positive	0.23[0.03431-0.44160]	0.0220054	1
1	114222325	rs11102669	EIRA	risk	A	G	A	295	83	85	230	468	313	497	221	8.02[5.99-10.7]	1.29[0.91-1.84]	5.37[4.04-7.13]	Positive	0.29[0.13755-0.45024]	0.000229236	0.241404	1	114222325	rs11102669	NARAC	risk	A	G	A	374	12	12	274	395	305	379	233	41.9[22.5-77.8]	1.27[0.55-2.95]	31.4[17.0-58.1]	Positive	0.24[0.04418-0.44089]	0.0165496	1
1	114263735	rs2093436	EIRA	risk	G	A	G	297	85	86	233	472	317	500	224	7.84[5.87-10.4]	1.27[0.89-1.80]	5.27[3.97-6.98]	Positive	0.29[0.13735-0.44967]	0.000229637	0.241404	1	114263735	rs2093436	NARAC	risk	G	A	G	373	12	12	275	395	306	379	232	42.2[22.7-78.4]	1.27[0.54-2.95]	31.3[16.9-57.8]	Positive	0.25[0.05581-0.44794]	0.0118038	1
1	114253639	rs1230647	EIRA	risk	C	T	C	300	85	86	233	476	319	503	225	7.92[5.93-10.5]	1.28[0.90-1.81]	5.32[4.02-7.05]	Positive	0.29[0.13662-0.44809]	0.000233785	0.241404	1	114253639	rs1230647	NARAC	risk	C	T	C	373	12	12	275	395	306	379	232	42.2[22.7-78.4]	1.27[0.54-2.95]	31.3[16.9-57.8]	Positive	0.25[0.05581-0.44794]	0.0118038	1
1	114253892	rs2295853	EIRA	risk	A	G	A	300	85	86	233	476	319	503	225	7.92[5.93-10.5]	1.28[0.90-1.81]	5.32[4.02-7.05]	Positive	0.29[0.13662-0.44809]	0.000233785	0.241404	1	114253892	rs2295853	NARAC	risk	A	G	A	373	12	12	275	395	306	379	232	42.2[22.7-78.4]	1.27[0.54-2.95]	31.3[16.9-57.8]	Positive	0.25[0.05581-0.44794]	0.0118038	1
1	114212571	rs1146187	EIRA	risk	A	G	A	298	84	85	231	475	318	499	223	7.98[5.97-10.6]	1.28[0.90-1.82]	5.36[4.04-7.11]	Positive	0.29[0.13668-0.44886]	0.000236697	0.241404	1	114212571	rs1146187	NARAC	risk	A	G	A	374	12	12	274	395	305	379	233	41.9[22.5-77.8]	1.27[0.55-2.95]	31.4[17.0-58.1]	Positive	0.24[0.04418-0.44089]	0.0165496	1
1	114210745	rs1230671	EIRA	risk	T	A	T	298	84	85	231	475	318	498	223	7.98[5.97-10.6]	1.28[0.90-1.82]	5.36[4.04-7.10]	Positive	0.29[0.13660-0.44881]	0.000237699	0.241404	1	114210745	rs1230671	NARAC	risk	T	A	T	374	12	12	274	395	305	379	233	41.9[22.5-77.8]	1.27[0.55-2.95]	31.4[17.0-58.1]	Positive	0.24[0.04418-0.44089]	0.0165496	1
1	114218451	rs1230658	EIRA	risk	C	G	C	299	84	85	231	475	318	499	223	8.01[5.99-10.7]	1.29[0.91-1.83]	5.37[4.05-7.12]	Positive	0.29[0.13637-0.44860]	0.000240445	0.241404	1	114218451	rs1230658	NARAC	risk	C	G	C	374	12	12	274	395	305	379	233	41.9[22.5-77.8]	1.27[0.55-2.95]	31.4[17.0-58.1]	Positive	0.24[0.04418-0.44089]	0.0165496	1
1	114218261	rs1230659	EIRA	risk	T	C	T	299	84	85	231	475	318	499	223	8.01[5.99-10.7]	1.29[0.91-1.83]	5.37[4.05-7.12]	Positive	0.29[0.13637-0.44860]	0.000240445	0.241404	1	114218261	rs1230659	NARAC	risk	T	C	T	374	12	12	274	395	305	379	233	41.9[22.5-77.8]	1.27[0.55-2.95]	31.4[17.0-58.1]	Positive	0.24[0.04418-0.44089]	0.0165496	1
1	114219601	rs6537792	EIRA	risk	G	C	G	299	84	85	231	475	318	499	223	8.01[5.99-10.7]	1.29[0.91-1.83]	5.37[4.05-7.12]	Positive	0.29[0.13637-0.44860]	0.000240445	0.241404	1	114219601	rs6537792	NARAC	risk	G	C	G	374	12	12	274	395	305	379	233	41.9[22.5-77.8]	1.27[0.55-2.95]	31.4[17.0-58.1]	Positive	0.24[0.04418-0.44089]	0.0165496	1
18	1640539	rs6505943	EIRA	non-risk	T	A	T	324	103	68	206	589	372	386	171	7.26[5.45-9.68]	1.02[0.72-1.46]	5.02[3.87-6.49]	Positive	0.30[0.14222-0.46807]	0.000241529	0.241404	18	1640539	rs6505943	NARAC	non-risk	T	A	T	382	14	10	266	445	342	329	196	37.8[21.0-68.1]	1.01[0.43-2.37]	28.9[16.2-51.3]	Positive	0.23[0.03242-0.44027]	0.02311	1
1	114287902	rs10858017	EIRA	risk	G	A	G	298	85	86	233	476	319	502	225	7.86[5.88-10.4]	1.27[0.89-1.80]	5.29[3.99-7.01]	Positive	0.29[0.13540-0.44757]	0.000251815	0.241404	1	114287902	rs10858017	NARAC	risk	G	A	G	372	12	12	276	395	307	379	231	42.1[22.6-78.3]	1.26[0.54-2.94]	31.2[16.9-57.7]	Positive	0.25[0.05595-0.44797]	0.0117521	1
1	114275437	rs12061482	EIRA	risk	T	C	T	298	85	86	233	476	319	502	225	7.86[5.88-10.4]	1.27[0.89-1.80]	5.29[3.99-7.01]	Positive	0.29[0.13540-0.44757]	0.000251815	0.241404	1	114275437	rs12061482	NARAC	risk	T	C	T	373	12	12	275	395	306	379	232	42.2[22.7-78.4]	1.27[0.54-2.95]	31.3[16.9-57.8]	Positive	0.25[0.05581-0.44794]	0.0118038	1
1	114277330	rs12063216	EIRA	risk	A	G	A	298	85	86	233	476	319	502	225	7.86[5.88-10.4]	1.27[0.89-1.80]	5.29[3.99-7.01]	Positive	0.29[0.13540-0.44757]	0.000251815	0.241404	1	114277330	rs12063216	NARAC	risk	A	G	A	373	12	12	275	395	306	379	232	42.2[22.7-78.4]	1.27[0.54-2.95]	31.3[16.9-57.8]	Positive	0.25[0.05581-0.44794]	0.0118038	1
1	114271128	rs1230638	EIRA	risk	A	G	A	298	85	86	233	476	319	502	225	7.86[5.88-10.4]	1.27[0.89-1.80]	5.29[3.99-7.01]	Positive	0.29[0.13540-0.44757]	0.000251815	0.241404	1	114271128	rs1230638	NARAC	risk	A	G	A	373	12	12	275	395	306	379	232	42.2[22.7-78.4]	1.27[0.54-2.95]	31.3[16.9-57.8]	Positive	0.25[0.05581-0.44794]	0.0118038	1
1	114270907	rs1230639	EIRA	risk	A	G	A	298	85	86	233	476	319	502	225	7.86[5.88-10.4]	1.27[0.89-1.80]	5.29[3.99-7.01]	Positive	0.29[0.13540-0.44757]	0.000251815	0.241404	1	114270907	rs1230639	NARAC	risk	A	G	A	373	12	12	275	395	306	379	232	42.2[22.7-78.4]	1.27[0.54-2.95]	31.3[16.9-57.8]	Positive	0.25[0.05581-0.44794]	0.0118038	1
1	114267347	rs1230640	EIRA	risk	C	T	C	298	85	86	233	476	319	502	225	7.86[5.88-10.4]	1.27[0.89-1.80]	5.29[3.99-7.01]	Positive	0.29[0.13540-0.44757]	0.000251815	0.241404	1	114267347	rs1230640	NARAC	risk	C	T	C	373	12	12	275	395	306	379	232	42.2[22.7-78.4]	1.27[0.54-2.95]	31.3[16.9-57.8]	Positive	0.25[0.05581-0.44794]	0.0118038	1
1	114267645	rs1981319	EIRA	risk	C	A	C	298	85	86	233	476	319	502	225	7.86[5.88-10.4]	1.27[0.89-1.80]	5.29[3.99-7.01]	Positive	0.29[0.13540-0.44757]	0.000251815	0.241404	1	114267645	rs1981319	NARAC	risk	C	A	C	373	12	12	275	395	306	379	232	42.2[22.7-78.4]	1.27[0.54-2.95]	31.3[16.9-57.8]	Positive	0.25[0.05581-0.44794]	0.0118038	1
1	114265244	rs4423005	EIRA	risk	C	T	C	298	85	86	233	476	319	502	225	7.86[5.88-10.4]	1.27[0.89-1.80]	5.29[3.99-7.01]	Positive	0.29[0.13540-0.44757]	0.000251815	0.241404	1	114265244	rs4423005	NARAC	risk	C	T	C	373	12	12	275	395	306	379	232	42.2[22.7-78.4]	1.27[0.54-2.95]	31.3[16.9-57.8]	Positive	0.25[0.05581-0.44794]	0.0118038	1
1	114288280	rs4565712	EIRA	risk	G	T	G	298	85	86	233	476	319	502	225	7.86[5.88-10.4]	1.27[0.89-1.80]	5.29[3.99-7.01]	Positive	0.29[0.13540-0.44757]	0.000251815	0.241404	1	114288280	rs4565712	NARAC	risk	G	T	G	372	12	12	276	395	307	379	231	42.1[22.6-78.3]	1.26[0.54-2.94]	31.2[16.9-57.7]	Positive	0.25[0.05595-0.44797]	0.0117521	1
1	114275601	rs6537795	EIRA	risk	T	C	T	298	85	86	233	476	319	502	225	7.86[5.88-10.4]	1.27[0.89-1.80]	5.29[3.99-7.01]	Positive	0.29[0.13540-0.44757]	0.000251815	0.241404	1	114275601	rs6537795	NARAC	risk	T	C	T	373	12	12	275	395	306	379	232	42.2[22.7-78.4]	1.27[0.54-2.95]	31.3[16.9-57.8]	Positive	0.25[0.05581-0.44794]	0.0118038	1
1	114264625	rs6663679	EIRA	risk	T	C	T	298	85	86	233	476	319	502	225	7.86[5.88-10.4]	1.27[0.89-1.80]	5.29[3.99-7.01]	Positive	0.29[0.13540-0.44757]	0.000251815	0.241404	1	114264625	rs6663679	NARAC	risk	T	C	T	373	12	12	275	395	306	379	232	42.2[22.7-78.4]	1.27[0.54-2.95]	31.3[16.9-57.8]	Positive	0.25[0.05581-0.44794]	0.0118038	1
1	114101115	rs11102653	EIRA	risk	A	G	A	300	87	80	226	492	323	475	213	7.77[5.81-10.3]	1.20[0.84-1.70]	5.28[4.00-6.98]	Positive	0.29[0.13649-0.45193]	0.000255954	0.241404	1	114101115	rs11102653	NARAC	risk	A	G	A	383	13	11	265	410	317	364	221	40.5[22.2-73.8]	1.16[0.49-2.70]	30.0[16.6-54.2]	Positive	0.25[0.05795-0.45105]	0.0111509	1
1	114244177	rs1230649	EIRA	risk	G	T	G	300	85	86	233	476	319	502	225	7.91[5.92-10.5]	1.28[0.90-1.81]	5.32[4.02-7.05]	Positive	0.29[0.13495-0.44707]	0.000257229	0.241404	1	114244177	rs1230649	NARAC	risk	G	T	G	373	12	12	275	395	306	379	232	42.2[22.7-78.4]	1.27[0.54-2.95]	31.3[16.9-57.8]	Positive	0.25[0.05581-0.44794]	0.0118038	1
1	114246453	rs1936398	EIRA	risk	C	T	C	300	85	86	233	476	319	502	225	7.91[5.92-10.5]	1.28[0.90-1.81]	5.32[4.02-7.05]	Positive	0.29[0.13495-0.44707]	0.000257229	0.241404	1	114246453	rs1936398	NARAC	risk	C	T	C	373	12	12	275	395	306	379	232	42.2[22.7-78.4]	1.27[0.54-2.95]	31.3[16.9-57.8]	Positive	0.25[0.05581-0.44794]	0.0118038	1
1	114249382	rs6698586	EIRA	risk	C	T	C	300	85	86	233	476	319	502	225	7.91[5.92-10.5]	1.28[0.90-1.81]	5.32[4.02-7.05]	Positive	0.29[0.13495-0.44707]	0.000257229	0.241404	1	114249382	rs6698586	NARAC	risk	C	T	C	373	12	12	275	395	306	379	232	42.2[22.7-78.4]	1.27[0.54-2.95]	31.3[16.9-57.8]	Positive	0.25[0.05581-0.44794]	0.0118038	1
1	114076546	rs11102649	EIRA	risk	G	A	G	283	84	79	233	484	315	481	216	7.56[5.64-10.1]	1.12[0.79-1.61]	5.20[3.92-6.90]	Positive	0.29[0.13661-0.45329]	0.000261124	0.241404	1	114076546	rs11102649	NARAC	risk	G	A	G	372	13	11	276	393	305	381	233	38.3[21.0-69.8]	1.07[0.46-2.49]	29.1[16.1-52.7]	Positive	0.23[0.03818-0.43804]	0.019577	1
1	114259069	rs1230645	EIRA	risk	C	T	C	300	85	86	233	476	319	502	225	7.91[5.92-10.5]	1.28[0.90-1.81]	5.32[4.02-7.05]	Positive	0.29[0.13458-0.44684]	0.000262678	0.241404	1	114259069	rs1230645	NARAC	risk	C	T	C	373	12	12	275	395	306	379	232	42.2[22.7-78.4]	1.27[0.54-2.95]	31.3[16.9-57.8]	Positive	0.25[0.05581-0.44794]	0.0118038	1
1	114259557	rs4600045	EIRA	risk	T	C	T	300	85	86	233	476	319	502	225	7.91[5.92-10.5]	1.28[0.90-1.81]	5.32[4.02-7.05]	Positive	0.29[0.13458-0.44684]	0.000262678	0.241404	1	114259557	rs4600045	NARAC	risk	T	C	T	373	12	12	275	395	306	379	232	42.2[22.7-78.4]	1.27[0.54-2.95]	31.3[16.9-57.8]	Positive	0.25[0.05581-0.44794]	0.0118038	1
1	114311768	rs10858018	EIRA	risk	A	G	A	298	85	86	232	476	319	502	225	7.86[5.88-10.4]	1.27[0.90-1.81]	5.29[3.99-7.01]	Positive	0.29[0.13461-0.44703]	0.000263261	0.241404	1	114311768	rs10858018	NARAC	risk	A	G	A	372	12	12	276	395	307	379	231	42.1[22.6-78.3]	1.26[0.54-2.94]	31.2[16.9-57.7]	Positive	0.25[0.05595-0.44797]	0.0117521	1
1	114298420	rs1230678	EIRA	risk	G	T	G	298	85	86	232	476	319	502	225	7.86[5.88-10.4]	1.27[0.90-1.81]	5.29[3.99-7.01]	Positive	0.29[0.13461-0.44703]	0.000263261	0.241404	1	114298420	rs1230678	NARAC	risk	G	T	G	372	12	12	276	395	307	379	231	42.1[22.6-78.3]	1.26[0.54-2.94]	31.2[16.9-57.7]	Positive	0.25[0.05595-0.44797]	0.0117521	1
1	114292544	rs1230685	EIRA	risk	C	T	C	298	85	86	232	476	319	502	225	7.86[5.88-10.4]	1.27[0.90-1.81]	5.29[3.99-7.01]	Positive	0.29[0.13461-0.44703]	0.000263261	0.241404	1	114292544	rs1230685	NARAC	risk	C	T	C	372	12	12	276	395	307	379	231	42.1[22.6-78.3]	1.26[0.54-2.94]	31.2[16.9-57.7]	Positive	0.25[0.05595-0.44797]	0.0117521	1
1	114302966	rs2797412	EIRA	risk	T	C	T	298	85	86	232	476	319	502	225	7.86[5.88-10.4]	1.27[0.90-1.81]	5.29[3.99-7.01]	Positive	0.29[0.13461-0.44703]	0.000263261	0.241404	1	114302966	rs2797412	NARAC	risk	T	C	T	372	12	12	276	395	307	379	231	42.1[22.6-78.3]	1.26[0.54-2.94]	31.2[16.9-57.7]	Positive	0.25[0.05595-0.44797]	0.0117521	1
18	41167592	rs8090254	EIRA	non-risk	T	G	G	61	16	146	439	93	84	836	440	7.27[4.13-12.7]	1.25[0.69-2.24]	4.25[2.27-7.95]	Positive	0.38[0.17632-0.58610]	0.000265528	0.241404	18	41167592	rs8090254	NARAC	non-risk	T	G	T	241	9	15	407	264	208	510	330	38.3[18.8-77.6]	1.13[0.47-2.71]	29.3[14.3-60.1]	Positive	0.23[0.02393-0.43775]	0.0287647	1
18	1652980	rs1159374	EIRA	non-risk	T	C	T	326	103	68	206	591	372	386	171	7.30[5.48-9.74]	1.03[0.72-1.47]	5.06[3.91-6.55]	Positive	0.30[0.13890-0.46566]	0.000287409	0.241404	18	1652980	rs1159374	NARAC	non-risk	T	C	T	382	14	10	266	446	343	328	195	37.9[21.0-68.2]	1.01[0.43-2.37]	28.9[16.2-51.3]	Positive	0.23[0.03431-0.44160]	0.0220054	1
18	1653198	rs1159375	EIRA	non-risk	G	A	G	326	103	68	206	591	372	386	171	7.30[5.48-9.74]	1.03[0.72-1.47]	5.06[3.91-6.55]	Positive	0.30[0.13890-0.46566]	0.000287409	0.241404	18	1653198	rs1159375	NARAC	non-risk	G	A	G	382	14	10	266	446	343	328	195	37.9[21.0-68.2]	1.01[0.43-2.37]	28.9[16.2-51.3]	Positive	0.23[0.03431-0.44160]	0.0220054	1
18	1647553	rs2198559	EIRA	non-risk	T	C	T	326	103	68	206	591	372	386	171	7.30[5.48-9.74]	1.03[0.72-1.47]	5.06[3.91-6.55]	Positive	0.30[0.13890-0.46566]	0.000287409	0.241404	18	1647553	rs2198559	NARAC	non-risk	T	C	T	382	14	10	266	446	343	328	195	37.9[21.0-68.2]	1.01[0.43-2.37]	28.9[16.2-51.3]	Positive	0.23[0.03431-0.44160]	0.0220054	1
18	1647562	rs2198560	EIRA	non-risk	C	T	C	326	103	68	206	591	372	386	171	7.30[5.48-9.74]	1.03[0.72-1.47]	5.06[3.91-6.55]	Positive	0.30[0.13890-0.46566]	0.000287409	0.241404	18	1647562	rs2198560	NARAC	non-risk	C	T	C	382	14	10	266	446	343	328	195	37.9[21.0-68.2]	1.01[0.43-2.37]	28.9[16.2-51.3]	Positive	0.23[0.03431-0.44160]	0.0220054	1
18	1647674	rs2198561	EIRA	non-risk	G	A	G	326	103	68	206	591	372	386	171	7.30[5.48-9.74]	1.03[0.72-1.47]	5.06[3.91-6.55]	Positive	0.30[0.13890-0.46566]	0.000287409	0.241404	18	1647674	rs2198561	NARAC	non-risk	G	A	G	382	14	10	266	446	343	328	195	37.9[21.0-68.2]	1.01[0.43-2.37]	28.9[16.2-51.3]	Positive	0.23[0.03431-0.44160]	0.0220054	1
18	1647406	rs2219123	EIRA	non-risk	T	G	T	326	103	68	206	591	372	386	171	7.30[5.48-9.74]	1.03[0.72-1.47]	5.06[3.91-6.55]	Positive	0.30[0.13890-0.46566]	0.000287409	0.241404	18	1647406	rs2219123	NARAC	non-risk	T	G	T	382	14	10	266	446	343	328	195	37.9[21.0-68.2]	1.01[0.43-2.37]	28.9[16.2-51.3]	Positive	0.23[0.03431-0.44160]	0.0220054	1
18	1647158	rs2345587	EIRA	non-risk	T	G	T	326	103	68	206	591	372	386	171	7.30[5.48-9.74]	1.03[0.72-1.47]	5.06[3.91-6.55]	Positive	0.30[0.13890-0.46566]	0.000287409	0.241404	18	1647158	rs2345587	NARAC	non-risk	T	G	T	382	14	10	266	446	343	328	195	37.9[21.0-68.2]	1.01[0.43-2.37]	28.9[16.2-51.3]	Positive	0.23[0.03431-0.44160]	0.0220054	1
18	1647120	rs2881178	EIRA	non-risk	A	G	A	326	103	68	206	591	372	386	171	7.30[5.48-9.74]	1.03[0.72-1.47]	5.06[3.91-6.55]	Positive	0.30[0.13890-0.46566]	0.000287409	0.241404	18	1647120	rs2881178	NARAC	non-risk	A	G	A	382	14	10	266	446	343	328	195	37.9[21.0-68.2]	1.01[0.43-2.37]	28.9[16.2-51.3]	Positive	0.23[0.03431-0.44160]	0.0220054	1
18	1651049	rs3859373	EIRA	non-risk	A	G	A	326	103	68	206	591	372	386	171	7.30[5.48-9.74]	1.03[0.72-1.47]	5.06[3.91-6.55]	Positive	0.30[0.13890-0.46566]	0.000287409	0.241404	18	1651049	rs3859373	NARAC	non-risk	A	G	A	382	14	10	266	446	343	328	195	37.9[21.0-68.2]	1.01[0.43-2.37]	28.9[16.2-51.3]	Positive	0.23[0.03431-0.44160]	0.0220054	1
18	1649592	rs6505949	EIRA	non-risk	T	A	T	326	103	68	206	591	372	386	171	7.30[5.48-9.74]	1.03[0.72-1.47]	5.06[3.91-6.55]	Positive	0.30[0.13890-0.46566]	0.000287409	0.241404	18	1649592	rs6505949	NARAC	non-risk	T	A	T	382	14	10	266	446	343	328	195	37.9[21.0-68.2]	1.01[0.43-2.37]	28.9[16.2-51.3]	Positive	0.23[0.03431-0.44160]	0.0220054	1
18	1648796	rs7232582	EIRA	non-risk	T	C	T	326	103	68	206	591	372	386	171	7.30[5.48-9.74]	1.03[0.72-1.47]	5.06[3.91-6.55]	Positive	0.30[0.13890-0.46566]	0.000287409	0.241404	18	1648796	rs7232582	NARAC	non-risk	T	C	T	382	14	10	266	446	343	328	195	37.9[21.0-68.2]	1.01[0.43-2.37]	28.9[16.2-51.3]	Positive	0.23[0.03431-0.44160]	0.0220054	1
18	1649142	rs8088560	EIRA	non-risk	A	G	A	326	103	68	206	591	372	386	171	7.30[5.48-9.74]	1.03[0.72-1.47]	5.06[3.91-6.55]	Positive	0.30[0.13890-0.46566]	0.000287409	0.241404	18	1649142	rs8088560	NARAC	non-risk	A	G	A	382	14	10	266	446	343	328	195	37.9[21.0-68.2]	1.01[0.43-2.37]	28.9[16.2-51.3]	Positive	0.23[0.03431-0.44160]	0.0220054	1
1	114191173	rs1777238	EIRA	risk	C	T	C	297	83	85	227	473	317	493	221	8.06[6.02-10.7]	1.32[0.93-1.87]	5.40[4.06-7.17]	Positive	0.29[0.13330-0.44720]	0.000289294	0.241433	1	114191173	rs1777238	NARAC	risk	C	T	C	374	12	12	274	395	305	379	233	41.9[22.5-77.8]	1.27[0.55-2.95]	31.4[17.0-58.1]	Positive	0.24[0.04418-0.44089]	0.0165496	1
18	1654053	rs2219125	EIRA	non-risk	C	T	C	327	103	68	206	591	372	388	172	7.32[5.49-9.76]	1.03[0.72-1.47]	5.07[3.92-6.57]	Positive	0.30[0.13853-0.46498]	0.000290638	0.241461	18	1654053	rs2219125	NARAC	non-risk	C	T	C	382	14	10	266	446	343	328	195	37.9[21.0-68.2]	1.01[0.43-2.37]	28.9[16.2-51.3]	Positive	0.23[0.03431-0.44160]	0.0220054	1
8	15932946	rs13250338	EIRA	risk	C	G	C	444	140	23	72	808	476	148	52	9.09[6.28-13.1]	1.02[0.61-1.70]	5.49[4.39-6.87]	Positive	0.39[0.17994-0.60553]	0.000297491	0.24157	8	15932946	rs13250338	NARAC	non-risk	C	G	C	555	18	6	93	681	490	93	48	50.4[27.0-94.1]	1.75[0.64-4.73]	34.3[20.8-56.7]	Positive	0.30[0.01111-0.59854]	0.0419327	1
8	15932915	rs1484762	EIRA	risk	A	G	A	444	140	23	72	808	476	148	52	9.09[6.28-13.1]	1.02[0.61-1.70]	5.49[4.39-6.87]	Positive	0.39[0.17994-0.60553]	0.000297491	0.24157	8	15932915	rs1484762	NARAC	non-risk	A	G	A	555	18	6	93	681	490	93	48	50.4[27.0-94.1]	1.75[0.64-4.73]	34.3[20.8-56.7]	Positive	0.30[0.01111-0.59854]	0.0419327	1
18	1660072	rs9303881	EIRA	non-risk	G	A	G	323	103	68	205	589	371	381	169	7.23[5.41-9.64]	1.02[0.72-1.46]	5.01[3.87-6.48]	Positive	0.30[0.13873-0.46689]	0.000297866	0.24157	18	1660072	rs9303881	NARAC	non-risk	G	A	G	381	14	10	267	444	343	330	195	38.0[21.1-68.5]	1.01[0.43-2.37]	28.7[16.1-51.1]	Positive	0.24[0.04147-0.44559]	0.018163	1
1	114329408	rs2797408	EIRA	risk	T	C	T	299	85	85	229	478	319	492	220	7.90[5.91-10.5]	1.28[0.90-1.82]	5.32[4.02-7.05]	Positive	0.28[0.13277-0.44705]	0.000299056	0.24157	1	114329408	rs2797408	NARAC	risk	T	C	T	372	12	12	276	395	306	379	232	42.1[22.6-78.2]	1.26[0.54-2.94]	31.2[16.9-57.7]	Positive	0.25[0.05534-0.44756]	0.011967	1
8	15933235	rs1484763	EIRA	risk	T	C	T	446	140	23	72	810	477	148	52	9.13[6.31-13.2]	1.03[0.61-1.71]	5.52[4.42-6.90]	Positive	0.39[0.17910-0.60505]	0.000308249	0.246407	8	15933235	rs1484763	NARAC	non-risk	T	C	T	555	18	6	93	681	490	93	48	50.4[27.0-94.1]	1.75[0.64-4.73]	34.3[20.8-56.7]	Positive	0.30[0.01111-0.59854]	0.0419327	1
18	1645463	rs8090436	EIRA	non-risk	T	C	T	307	99	67	204	563	352	381	168	7.18[5.36-9.62]	1.00[0.70-1.44]	4.99[3.83-6.50]	Positive	0.30[0.13919-0.47042]	0.000309304	0.246407	18	1645463	rs8090436	NARAC	non-risk	T	C	T	382	14	10	266	445	342	329	196	37.8[21.0-68.1]	1.01[0.43-2.37]	28.9[16.2-51.4]	Positive	0.23[0.03237-0.44024]	0.0231371	1
18	1638530	rs4797934	EIRA	non-risk	A	G	A	324	103	68	205	589	371	385	171	7.24[5.43-9.66]	1.03[0.72-1.47]	5.03[3.88-6.51]	Positive	0.30[0.13696-0.46485]	0.000321375	0.254325	18	1638530	rs4797934	NARAC	non-risk	A	G	A	382	14	10	266	445	342	329	196	37.8[21.0-68.1]	1.01[0.43-2.37]	28.9[16.2-51.3]	Positive	0.23[0.03242-0.44027]	0.02311	1
1	114338236	rs1217396	EIRA	risk	C	T	C	298	85	86	232	477	318	500	224	7.86[5.88-10.5]	1.27[0.90-1.81]	5.32[4.01-7.05]	Positive	0.28[0.13064-0.44484]	0.000330845	0.260472	1	114338236	rs1217396	NARAC	risk	C	T	C	371	12	12	277	394	306	380	232	42.1[22.7-78.3]	1.26[0.54-2.93]	31.1[16.8-57.4]	Positive	0.25[0.06090-0.45087]	0.0101058	1
1	114346749	rs1217376	EIRA	risk	A	C	A	285	80	84	229	449	305	481	218	7.91[5.88-10.6]	1.28[0.90-1.83]	5.32[3.98-7.10]	Positive	0.29[0.13234-0.45095]	0.000332959	0.260472	1	114346749	rs1217376	NARAC	risk	A	C	A	372	12	12	276	394	306	380	232	42.2[22.7-78.5]	1.26[0.54-2.94]	31.1[16.8-57.5]	Positive	0.25[0.06075-0.45080]	0.0101542	1
1	114265928	rs7553188	EIRA	risk	C	T	C	295	84	85	229	468	313	497	223	7.87[5.88-10.5]	1.28[0.90-1.81]	5.32[4.01-7.06]	Positive	0.28[0.13063-0.44614]	0.00033955	0.264264	1	114265928	rs7553188	NARAC	risk	C	T	C	373	12	12	275	395	306	379	232	42.2[22.7-78.4]	1.27[0.54-2.95]	31.3[16.9-57.8]	Positive	0.25[0.05581-0.44794]	0.0118038	1
1	114404901	rs1775754	EIRA	risk	C	T	C	285	76	85	231	455	307	488	219	8.38[6.20-11.3]	1.35[0.95-1.94]	5.61[4.18-7.52]	Positive	0.28[0.12964-0.44611]	0.000362679	0.280366	1	114404901	rs1775754	NARAC	risk	C	T	C	372	12	12	276	395	306	379	232	42.1[22.6-78.2]	1.26[0.54-2.94]	31.2[16.9-57.7]	Positive	0.25[0.05518-0.44762]	0.0120298	1
18	1668545	rs1020637	EIRA	non-risk	G	T	G	323	103	68	205	592	370	382	169	7.24[5.43-9.66]	1.02[0.72-1.46]	5.05[3.90-6.53]	Positive	0.29[0.13406-0.46372]	0.00037926	0.282452	18	1668545	rs1020637	NARAC	non-risk	G	T	G	381	14	10	267	444	343	330	195	38.0[21.1-68.5]	1.01[0.43-2.37]	28.7[16.1-51.1]	Positive	0.24[0.04147-0.44559]	0.018163	1
18	1666392	rs4141813	EIRA	non-risk	G	A	G	323	103	68	205	592	370	382	169	7.24[5.43-9.66]	1.02[0.72-1.46]	5.05[3.90-6.53]	Positive	0.29[0.13406-0.46372]	0.00037926	0.282452	18	1666392	rs4141813	NARAC	non-risk	G	A	G	381	14	10	267	444	343	330	195	38.0[21.1-68.5]	1.01[0.43-2.37]	28.7[16.1-51.1]	Positive	0.24[0.04147-0.44559]	0.018163	1
18	1669427	rs4141814	EIRA	non-risk	T	G	T	323	103	68	205	592	370	382	169	7.24[5.43-9.66]	1.02[0.72-1.46]	5.05[3.90-6.53]	Positive	0.29[0.13406-0.46372]	0.00037926	0.282452	18	1669427	rs4141814	NARAC	non-risk	T	G	T	381	14	10	267	444	343	330	195	38.0[21.1-68.5]	1.01[0.43-2.37]	28.7[16.1-51.1]	Positive	0.24[0.04147-0.44559]	0.018163	1
18	1670019	rs8096095	EIRA	non-risk	A	C	A	323	103	68	205	592	370	382	169	7.24[5.43-9.66]	1.02[0.72-1.46]	5.05[3.90-6.53]	Positive	0.29[0.13406-0.46372]	0.00037926	0.282452	18	1670019	rs8096095	NARAC	non-risk	A	C	A	381	14	10	267	444	343	330	195	38.0[21.1-68.5]	1.01[0.43-2.37]	28.7[16.1-51.1]	Positive	0.24[0.04147-0.44559]	0.018163	1
1	114364476	rs1217388	EIRA	risk	G	A	G	299	85	86	234	479	319	500	225	7.85[5.87-10.4]	1.27[0.89-1.80]	5.34[4.03-7.07]	Positive	0.28[0.12739-0.44227]	0.000391083	0.282452	1	114364476	rs1217388	NARAC	risk	G	A	G	372	12	12	276	395	306	379	232	42.1[22.6-78.2]	1.26[0.54-2.94]	31.2[16.9-57.7]	Positive	0.25[0.05518-0.44762]	0.0120298	1
1	114365752	rs1217389	EIRA	risk	C	T	C	299	85	86	234	479	319	500	225	7.85[5.87-10.4]	1.27[0.89-1.80]	5.34[4.03-7.07]	Positive	0.28[0.12739-0.44227]	0.000391083	0.282452	1	114365752	rs1217389	NARAC	risk	C	T	C	372	12	12	276	395	306	379	232	42.1[22.6-78.2]	1.26[0.54-2.94]	31.2[16.9-57.7]	Positive	0.25[0.05518-0.44762]	0.0120298	1
1	114374435	rs1217395	EIRA	risk	C	T	C	299	85	86	234	479	319	500	225	7.85[5.87-10.4]	1.27[0.89-1.80]	5.34[4.03-7.07]	Positive	0.28[0.12739-0.44227]	0.000391083	0.282452	1	114374435	rs1217395	NARAC	risk	C	T	C	372	12	12	276	395	306	379	232	42.1[22.6-78.2]	1.26[0.54-2.94]	31.2[16.9-57.7]	Positive	0.25[0.05518-0.44762]	0.0120298	1
1	114393748	rs1217407	EIRA	risk	A	G	A	299	85	86	234	479	319	500	225	7.85[5.87-10.4]	1.27[0.89-1.80]	5.34[4.03-7.07]	Positive	0.28[0.12739-0.44227]	0.000391083	0.282452	1	114393748	rs1217407	NARAC	risk	A	G	A	372	12	12	276	396	306	378	232	42.0[22.6-78.0]	1.26[0.54-2.94]	31.3[16.9-57.9]	Positive	0.24[0.05038-0.44479]	0.0138638	1
1	114396816	rs1217410	EIRA	risk	C	T	C	299	85	86	234	479	319	500	225	7.85[5.87-10.4]	1.27[0.89-1.80]	5.34[4.03-7.07]	Positive	0.28[0.12739-0.44227]	0.000391083	0.282452	1	114396816	rs1217410	NARAC	risk	C	T	C	372	12	12	276	395	306	379	232	42.1[22.6-78.2]	1.26[0.54-2.94]	31.2[16.9-57.7]	Positive	0.25[0.05518-0.44762]	0.0120298	1
1	114357211	rs1217412	EIRA	risk	G	A	G	299	85	86	234	479	319	500	225	7.85[5.87-10.4]	1.27[0.89-1.80]	5.34[4.03-7.07]	Positive	0.28[0.12739-0.44227]	0.000391083	0.282452	1	114357211	rs1217412	NARAC	risk	G	A	G	372	12	12	276	394	306	380	232	42.2[22.7-78.5]	1.26[0.54-2.94]	31.1[16.8-57.5]	Positive	0.25[0.06075-0.45080]	0.0101542	1
1	114377093	rs1599971	EIRA	risk	A	G	A	299	85	86	234	479	319	500	225	7.85[5.87-10.4]	1.27[0.89-1.80]	5.34[4.03-7.07]	Positive	0.28[0.12739-0.44227]	0.000391083	0.282452	1	114377093	rs1599971	NARAC	risk	A	G	A	372	12	12	276	395	306	379	232	42.1[22.6-78.2]	1.26[0.54-2.94]	31.2[16.9-57.7]	Positive	0.25[0.05518-0.44762]	0.0120298	1
1	114319233	rs10858019	EIRA	risk	C	A	C	298	85	86	231	476	319	498	225	7.79[5.83-10.4]	1.28[0.90-1.81]	5.29[3.99-7.01]	Positive	0.28[0.12661-0.44208]	0.000410454	0.294445	1	114319233	rs10858019	NARAC	risk	C	A	C	372	12	12	276	395	307	379	231	42.1[22.6-78.3]	1.26[0.54-2.94]	31.2[16.9-57.7]	Positive	0.25[0.05595-0.44797]	0.0117521	1
18	1673538	rs2100448	EIRA	non-risk	C	A	C	323	103	68	205	592	369	380	168	7.25[5.43-9.68]	1.02[0.72-1.46]	5.06[3.91-6.55]	Positive	0.29[0.13228-0.46307]	0.000419139	0.297132	18	1673538	rs2100448	NARAC	non-risk	C	A	C	381	14	10	267	444	343	330	195	38.0[21.1-68.5]	1.01[0.43-2.37]	28.7[16.1-51.1]	Positive	0.24[0.04147-0.44559]	0.018163	1
1	114345750	rs1217377	EIRA	risk	C	T	C	299	85	86	232	479	319	500	225	7.85[5.87-10.4]	1.28[0.90-1.81]	5.34[4.03-7.07]	Positive	0.28[0.12602-0.44132]	0.000420648	0.297132	1	114345750	rs1217377	NARAC	risk	C	T	C	372	12	12	276	394	306	380	232	42.2[22.7-78.5]	1.26[0.54-2.94]	31.1[16.8-57.5]	Positive	0.25[0.06075-0.45080]	0.0101542	1
1	114343336	rs1217380	EIRA	risk	G	A	G	299	85	86	232	479	319	500	225	7.85[5.87-10.4]	1.28[0.90-1.81]	5.34[4.03-7.07]	Positive	0.28[0.12602-0.44132]	0.000420648	0.297132	1	114343336	rs1217380	NARAC	risk	G	A	G	372	12	12	276	394	306	380	232	42.2[22.7-78.5]	1.26[0.54-2.94]	31.1[16.8-57.5]	Positive	0.25[0.06075-0.45080]	0.0101542	1
1	114402846	rs1217421	EIRA	risk	G	C	G	299	85	85	234	479	319	498	225	7.81[5.85-10.4]	1.26[0.88-1.78]	5.34[4.03-7.07]	Positive	0.28[0.12563-0.44131]	0.000431452	0.30143	1	114402846	rs1217421	NARAC	risk	G	C	G	372	12	12	276	395	306	379	232	42.1[22.6-78.2]	1.26[0.54-2.94]	31.2[16.9-57.7]	Positive	0.25[0.05518-0.44762]	0.0120298	1
13	109650133	rs12560410	EIRA	risk	T	C	T	431	139	32	98	784	465	188	72	8.30[5.94-11.5]	1.02[0.65-1.59]	5.31[4.24-6.66]	Positive	0.35[0.15795-0.55492]	0.000431862	0.30143	13	109650133	rs12560410	NARAC	non-risk	T	C	T	507	17	7	141	602	436	172	102	45.2[25.4-80.4]	1.51[0.59-3.83]	33.5[19.9-56.2]	Positive	0.24[0.00569-0.49128]	0.0448606	1
1	114130098	rs1217208	EIRA	risk	G	A	G	293	85	80	220	472	312	469	212	7.72[5.76-10.3]	1.23[0.86-1.76]	5.26[3.97-6.98]	Positive	0.28[0.12699-0.44822]	0.000448609	0.311522	1	114130098	rs1217208	NARAC	risk	G	A	G	379	13	11	269	408	315	366	223	40.3[22.1-73.4]	1.15[0.49-2.67]	29.9[16.5-54.0]	Positive	0.25[0.05735-0.45045]	0.0113443	1
1	114319416	rs12044534	EIRA	risk	C	G	C	298	85	86	231	476	319	496	225	7.76[5.81-10.3]	1.28[0.90-1.82]	5.29[3.99-7.01]	Positive	0.28[0.12375-0.44034]	0.000478975	0.33047	1	114319416	rs12044534	NARAC	risk	C	G	C	372	12	12	276	395	307	379	231	42.1[22.6-78.3]	1.26[0.54-2.94]	31.2[16.9-57.7]	Positive	0.25[0.05595-0.44797]	0.0117521	1
14	96052346	rs61981887	EIRA	risk	C	T	C	209	58	110	305	340	237	599	282	7.69[5.56-10.6]	1.28[0.89-1.85]	5.20[3.72-7.29]	Positive	0.28[0.12495-0.44694]	0.000499082	0.342345	14	96052346	rs61981887	NARAC	risk	C	T	C	263	9	15	385	257	211	517	327	38.6[19.1-77.8]	1.15[0.48-2.73]	29.2[14.3-59.6]	Positive	0.23[0.03695-0.44013]	0.0203792	1
1	20969829	rs7521885	EIRA	non-risk	G	T	T	35	11	148	467	64	57	873	460	6.12[3.06-12.2]	1.00[0.49-2.03]	3.47[1.60-7.51]	Positive	0.43[0.18880-0.67681]	0.000507821	0.346583	1	20969829	rs7521885	NARAC	non-risk	G	T	G	341	12	12	307	390	295	384	243	42.3[22.6-79.3]	1.16[0.50-2.70]	29.1[15.6-54.3]	Positive	0.30[0.12457-0.48860]	0.000961639	1
1	114330202	rs2797409	EIRA	risk	C	T	C	298	84	87	235	478	318	501	226	7.88[5.89-10.5]	1.28[0.91-1.82]	5.38[4.06-7.14]	Positive	0.28[0.12200-0.43815]	0.000515015	0.349418	1	114330202	rs2797409	NARAC	risk	C	T	C	372	12	12	276	394	306	380	232	42.2[22.7-78.5]	1.26[0.54-2.94]	31.1[16.8-57.5]	Positive	0.25[0.06075-0.45080]	0.0101542	1
1	114420328	rs12566340	EIRA	risk	T	C	T	304	88	83	229	497	327	482	217	7.69[5.76-10.2]	1.22[0.86-1.74]	5.30[4.02-7.00]	Positive	0.28[0.12053-0.43980]	0.000581787	0.392706	1	114420328	rs12566340	NARAC	risk	T	C	T	379	12	12	269	409	316	365	222	44.0[23.6-81.9]	1.37[0.59-3.18]	32.3[17.5-59.6]	Positive	0.25[0.06225-0.45267]	0.0097357	1
3	171214757	rs6764883	EIRA	risk	C	A	C	316	96	75	209	534	340	425	186	7.63[5.72-10.1]	1.17[0.82-1.66]	5.27[4.03-6.88]	Positive	0.28[0.12315-0.45094]	0.000597488	0.400626	3	171214757	rs6764883	NARAC	risk	C	A	C	392	13	11	256	435	323	339	215	39.9[21.8-73.0]	1.18[0.51-2.76]	31.1[17.2-56.2]	Positive	0.21[0.00922-0.42341]	0.0406249	1
1	114420462	rs7529353	EIRA	risk	A	G	A	303	88	83	230	498	327	481	217	7.64[5.73-10.2]	1.21[0.86-1.72]	5.30[4.02-6.99]	Positive	0.27[0.11822-0.43845]	0.000656422	0.437827	1	114420462	rs7529353	NARAC	risk	A	G	A	379	12	12	269	408	315	366	223	43.9[23.6-81.7]	1.37[0.59-3.18]	32.3[17.5-59.7]	Positive	0.25[0.05888-0.45056]	0.0107945	1
18	1623615	rs9960142	EIRA	non-risk	T	C	T	320	98	67	196	581	362	353	155	7.63[5.67-10.2]	1.10[0.76-1.58]	5.27[4.05-6.86]	Positive	0.29[0.12481-0.46518]	0.000680209	0.451391	18	1623615	rs9960142	NARAC	non-risk	T	C	T	387	14	10	261	452	345	322	193	38.2[21.2-68.8]	1.06[0.45-2.49]	29.7[16.7-52.9]	Positive	0.21[0.01121-0.42852]	0.0388872	1
13	55616418	rs17089974	EIRA	risk	A	C	A	236	72	89	269	385	253	552	255	7.16[5.28-9.70]	1.08[0.75-1.54]	5.05[3.71-6.89]	Positive	0.28[0.11860-0.44636]	0.000728617	0.473676	13	55616418	rs17089974	NARAC	non-risk	A	C	A	278	9	15	370	324	251	450	287	41.2[20.3-83.6]	1.26[0.53-3.00]	32.0[15.7-65.2]	Positive	0.21[0.01221-0.42068]	0.0377808	1
13	55617394	rs1998694	EIRA	risk	C	T	C	236	72	89	269	385	253	552	255	7.16[5.28-9.70]	1.08[0.75-1.54]	5.05[3.71-6.89]	Positive	0.28[0.11860-0.44636]	0.000728617	0.473676	13	55617394	rs1998694	NARAC	non-risk	C	T	C	278	9	15	370	324	251	450	287	41.2[20.3-83.6]	1.26[0.53-3.00]	32.0[15.7-65.2]	Positive	0.21[0.01221-0.42068]	0.0377808	1
13	55615756	rs9597091	EIRA	risk	C	G	C	236	72	89	269	385	253	552	255	7.16[5.28-9.70]	1.08[0.75-1.54]	5.05[3.71-6.89]	Positive	0.28[0.11860-0.44636]	0.000728617	0.473676	13	55615756	rs9597091	NARAC	non-risk	C	G	C	278	9	15	370	324	251	450	287	41.2[20.3-83.6]	1.26[0.53-3.00]	32.0[15.7-65.2]	Positive	0.21[0.01221-0.42068]	0.0377808	1
13	55616788	rs9597092	EIRA	risk	G	A	G	236	72	89	269	385	253	552	255	7.16[5.28-9.70]	1.08[0.75-1.54]	5.05[3.71-6.89]	Positive	0.28[0.11860-0.44636]	0.000728617	0.473676	13	55616788	rs9597092	NARAC	non-risk	G	A	G	278	9	15	370	324	251	450	287	41.2[20.3-83.6]	1.26[0.53-3.00]	32.0[15.7-65.2]	Positive	0.21[0.01221-0.42068]	0.0377808	1
2	196000594	rs72912069	EIRA	non-risk	G	A	G	437	144	23	67	815	482	116	42	8.75[5.84-13.1]	1.04[0.62-1.75]	5.21[4.17-6.50]	Positive	0.39[0.16586-0.63136]	0.000788711	0.509964	2	196000594	rs72912069	NARAC	non-risk	G	A	G	538	18	6	110	638	466	136	72	52.7[29.2-95.1]	1.49[0.56-3.97]	32.6[19.7-54.0]	Positive	0.37[0.14275-0.60098]	0.0014667	1
8	134676889	rs2922500	EIRA	risk	C	T	C	250	79	92	283	410	273	569	271	6.74[5.02-9.04]	1.02[0.72-1.45]	4.85[3.60-6.53]	Positive	0.27[0.11389-0.43750]	0.000838971	0.539442	8	134676889	rs2922500	NARAC	non-risk	C	T	C	309	10	14	339	358	276	416	262	39.6[20.2-77.5]	1.15[0.49-2.69]	30.3[15.5-59.3]	Positive	0.23[0.02994-0.43045]	0.0242568	1
13	64846722	rs9540018	EIRA	risk	T	C	C	102	22	149	431	150	122	829	422	9.41[5.83-15.1]	1.63[0.99-2.69]	5.88[3.49-9.92]	Positive	0.30[0.12617-0.48880]	0.000887358	0.561124	13	64846722	rs9540018	NARAC	risk	T	C	T	205	6	18	443	191	172	583	366	49.2[21.0-114.]	1.52[0.58-4.01]	31.5[13.2-74.9]	Positive	0.34[0.16385-0.53390]	0.000219298	0.475753
1	114406451	rs2488458	EIRA	risk	T	C	T	298	85	85	233	478	318	491	225	7.68[5.75-10.2]	1.26[0.88-1.78]	5.33[4.02-7.06]	Positive	0.27[0.11169-0.43292]	0.000890355	0.561124	1	114406451	rs2488458	NARAC	risk	T	C	T	372	12	12	276	395	306	379	232	42.1[22.6-78.2]	1.26[0.54-2.94]	31.2[16.9-57.7]	Positive	0.25[0.05518-0.44762]	0.0120298	1
13	55620210	rs17089991	EIRA	risk	C	T	C	237	72	89	268	391	255	549	253	7.21[5.32-9.78]	1.08[0.76-1.55]	5.11[3.75-6.96]	Positive	0.27[0.11424-0.44289]	0.000891466	0.561124	13	55620210	rs17089991	NARAC	non-risk	C	T	C	278	9	15	370	325	251	449	287	41.1[20.3-83.4]	1.26[0.53-3.00]	32.1[15.8-65.4]	Positive	0.21[0.00673-0.41746]	0.0429458	1
13	55619790	rs7319479	EIRA	risk	G	A	G	237	72	89	268	391	255	549	253	7.21[5.32-9.78]	1.08[0.76-1.55]	5.11[3.75-6.96]	Positive	0.27[0.11424-0.44289]	0.000891466	0.561124	13	55619790	rs7319479	NARAC	non-risk	G	A	G	278	9	15	370	325	251	449	287	41.1[20.3-83.4]	1.26[0.53-3.00]	32.1[15.8-65.4]	Positive	0.21[0.00673-0.41746]	0.0429458	1
14	96055400	rs7153251	EIRA	risk	G	A	G	210	58	112	310	342	236	605	286	7.72[5.58-10.6]	1.29[0.89-1.86]	5.30[3.78-7.42]	Positive	0.27[0.11289-0.43810]	0.000897468	0.562021	14	96055400	rs7153251	NARAC	risk	G	A	G	263	9	15	385	257	211	517	327	38.6[19.1-77.8]	1.15[0.48-2.73]	29.2[14.3-59.6]	Positive	0.23[0.03695-0.44013]	0.0203792	1
18	1668840	rs2123935	EIRA	non-risk	C	T	C	317	102	68	201	583	360	378	168	7.15[5.35-9.56]	1.03[0.72-1.48]	5.08[3.91-6.58]	Positive	0.28[0.11604-0.45400]	0.000946411	0.589713	18	1668840	rs2123935	NARAC	non-risk	C	T	C	381	14	10	267	444	343	330	195	38.0[21.1-68.5]	1.01[0.43-2.37]	28.7[16.1-51.1]	Positive	0.24[0.04147-0.44559]	0.018163	1
3	171214080	rs2111985	EIRA	risk	T	C	T	312	95	74	217	522	338	448	203	7.32[5.50-9.74]	1.11[0.78-1.58]	5.18[3.96-6.78]	Positive	0.27[0.11229-0.44004]	0.000956214	0.592937	3	171214080	rs2111985	NARAC	risk	T	C	T	392	13	11	256	435	323	339	215	39.9[21.8-73.0]	1.18[0.51-2.76]	31.1[17.2-56.2]	Positive	0.21[0.00922-0.42341]	0.0406249	1
2	196052989	rs1511267	EIRA	non-risk	T	A	T	411	133	33	103	743	449	203	83	7.79[5.63-10.7]	1.00[0.64-1.56]	5.20[4.13-6.55]	Positive	0.33[0.13361-0.52946]	0.00102645	0.632446	2	196052989	rs1511267	NARAC	non-risk	T	A	T	512	17	7	136	619	444	155	94	46.3[25.8-83.2]	1.50[0.59-3.79]	33.6[20.0-56.4]	Positive	0.26[0.01719-0.51094]	0.0360387	1
13	64854469	rs9598765	EIRA	risk	T	C	C	102	22	149	426	150	122	820	418	9.40[5.83-15.1]	1.65[1.00-2.72]	5.89[3.49-9.92]	Positive	0.30[0.12263-0.48651]	0.0010341	0.632446	13	64854469	rs9598765	NARAC	risk	T	C	T	205	6	18	443	191	172	583	366	49.2[21.0-114.]	1.52[0.58-4.01]	31.5[13.2-74.9]	Positive	0.34[0.16385-0.53390]	0.000219298	0.475753
19	2059863	rs10404906	EIRA	risk	C	T	C	268	85	80	247	460	299	494	231	6.79[5.07-9.09]	1.01[0.71-1.44]	4.92[3.69-6.54]	Positive	0.27[0.11009-0.43813]	0.00105421	0.641519	19	2059863	rs10404906	NARAC	non-risk	C	T	C	312	9	15	336	355	261	419	277	47.9[23.6-97.0]	1.61[0.67-3.83]	36.6[18.0-74.3]	Positive	0.22[0.01920-0.42307]	0.031841	1
13	64849861	rs1340335	EIRA	risk	A	G	G	102	22	149	426	150	122	821	419	9.39[5.82-15.1]	1.65[1.00-2.72]	5.88[3.49-9.92]	Positive	0.30[0.12208-0.48612]	0.00105781	0.644422	13	64849861	rs1340335	NARAC	risk	A	G	A	205	6	18	443	191	172	583	366	49.2[21.0-114.]	1.52[0.58-4.01]	31.5[13.2-74.9]	Positive	0.34[0.16385-0.53390]	0.000219298	0.475753
14	96072104	rs911672	EIRA	non-risk	G	A	G	243	75	93	284	467	304	503	234	6.95[5.13-9.41]	1.04[0.73-1.48]	5.02[3.73-6.76]	Positive	0.27[0.10841-0.43411]	0.00109504	0.665446	14	96072104	rs911672	NARAC	risk	G	A	G	301	10	14	347	306	249	468	289	41.7[21.3-81.6]	1.24[0.52-2.90]	29.9[15.2-58.7]	Positive	0.27[0.09178-0.46301]	0.0033976	1
8	133382498	rs6992843	EIRA	non-risk	C	T	T	40	12	159	493	54	51	925	493	6.23[3.23-12.0]	1.05[0.53-2.06]	3.56[1.67-7.56]	Positive	0.42[0.16711-0.67361]	0.00114046	0.686263	8	133382498	rs6992843	NARAC	non-risk	C	T	C	335	13	11	313	387	299	387	239	39.2[21.4-72.0]	1.03[0.44-2.40]	27.7[15.2-50.5]	Positive	0.29[0.10778-0.47621]	0.00189115	1
1	201770929	rs2678209	EIRA	risk	A	G	A	269	86	85	264	479	307	500	237	6.77[5.06-9.05]	1.00[0.71-1.42]	4.93[3.71-6.55]	Positive	0.26[0.10595-0.43347]	0.00124575	0.741576	1	201770929	rs2678209	NARAC	risk	A	G	A	320	11	13	328	364	293	410	245	39.2[20.5-75.0]	1.17[0.50-2.71]	30.8[16.1-58.9]	Positive	0.20[0.00391-0.41537]	0.0457939	1
4	48467192	rs7438713	EIRA	risk	C	T	T	114	32	136	406	154	118	810	413	7.20[4.76-10.8]	1.20[0.77-1.87]	4.74[2.98-7.53]	Positive	0.31[0.12261-0.50196]	0.00125058	0.741576	4	48467192	rs7438713	NARAC	risk	C	T	C	500	16	8	148	536	412	238	126	52.4[29.6-92.8]	1.69[0.69-4.16]	32.7[19.1-55.8]	Positive	0.36[0.17448-0.54984]	0.000155492	0.413351
18	1650928	rs3859370	EIRA	non-risk	G	A	G	321	100	71	205	580	358	385	171	7.37[5.51-9.84]	1.09[0.77-1.56]	5.22[4.02-6.78]	Positive	0.27[0.10928-0.44753]	0.00125316	0.741576	18	1650928	rs3859370	NARAC	non-risk	G	A	G	382	14	10	266	446	343	328	195	37.9[21.0-68.2]	1.01[0.43-2.37]	28.9[16.2-51.3]	Positive	0.23[0.03431-0.44160]	0.0220054	1
18	1676030	rs1869526	EIRA	non-risk	A	G	A	317	101	66	194	582	364	360	162	7.13[5.32-9.56]	1.06[0.73-1.52]	5.06[3.90-6.56]	Positive	0.28[0.11063-0.45366]	0.00126272	0.743915	18	1676030	rs1869526	NARAC	non-risk	A	G	A	383	14	10	265	444	344	330	194	38.6[21.4-69.4]	1.04[0.44-2.44]	29.1[16.3-51.7]	Positive	0.24[0.04333-0.44662]	0.0172578	1
13	55618751	rs6561813	EIRA	risk	T	C	T	237	68	90	268	391	255	549	253	7.66[5.62-10.4]	1.16[0.81-1.67]	5.43[3.96-7.43]	Positive	0.26[0.10404-0.43424]	0.00139755	0.8187	13	55618751	rs6561813	NARAC	non-risk	T	C	T	278	9	15	370	325	251	449	287	41.1[20.3-83.4]	1.26[0.53-3.00]	32.1[15.8-65.4]	Positive	0.21[0.00673-0.41746]	0.0429458	1
13	55619355	rs7337504	EIRA	risk	T	C	T	237	68	90	268	391	255	549	253	7.66[5.62-10.4]	1.16[0.81-1.67]	5.43[3.96-7.43]	Positive	0.26[0.10404-0.43424]	0.00139755	0.8187	13	55619355	rs7337504	NARAC	non-risk	T	C	T	278	9	15	370	325	251	449	287	41.1[20.3-83.4]	1.26[0.53-3.00]	32.1[15.8-65.4]	Positive	0.21[0.00673-0.41746]	0.0429458	1
18	1623755	rs8098873	EIRA	non-risk	G	A	G	320	98	67	195	583	364	351	157	7.47[5.55-10.0]	1.10[0.77-1.58]	5.26[4.05-6.84]	Positive	0.28[0.10809-0.45411]	0.00144985	0.843921	18	1623755	rs8098873	NARAC	non-risk	G	A	G	387	14	10	261	452	345	322	193	38.2[21.2-68.8]	1.06[0.45-2.49]	29.7[16.7-52.9]	Positive	0.21[0.01121-0.42852]	0.0388872	1
13	64851365	rs4884566	EIRA	risk	T	C	C	100	22	149	424	150	121	817	417	9.19[5.69-14.8]	1.62[0.98-2.67]	5.82[3.45-9.82]	Positive	0.29[0.11392-0.48289]	0.00152223	0.880489	13	64851365	rs4884566	NARAC	risk	T	C	T	205	6	18	443	191	172	583	366	49.2[21.0-114.]	1.52[0.58-4.01]	31.5[13.2-74.9]	Positive	0.34[0.16385-0.53390]	0.000219298	0.475753
2	196048663	rs10497750	EIRA	risk	A	C	A	412	133	33	101	744	451	199	82	7.75[5.59-10.7]	1.02[0.66-1.59]	5.20[4.13-6.55]	Positive	0.32[0.12405-0.52606]	0.00152595	0.88212	2	196048663	rs10497750	NARAC	non-risk	A	C	A	512	17	7	136	619	444	155	94	46.3[25.8-83.2]	1.50[0.59-3.79]	33.6[20.0-56.4]	Positive	0.26[0.01719-0.51094]	0.0360387	1
2	180451625	rs62176093	EIRA	risk	T	G	T	417	131	38	108	730	440	238	97	7.92[5.81-10.7]	1.11[0.72-1.69]	5.34[4.24-6.73]	Positive	0.31[0.11838-0.50264]	0.00153626	0.883737	2	180451625	rs62176093	NARAC	non-risk	T	G	T	485	12	12	163	579	415	195	123	64.5[33.8-122.]	3.57[1.52-8.35]	46.8[25.5-85.8]	Positive	0.23[0.00232-0.46468]	0.0477364	1
13	55637545	rs6561816	EIRA	risk	C	A	C	245	75	96	288	398	265	581	279	6.90[5.12-9.28]	1.08[0.76-1.54]	4.99[3.68-6.76]	Positive	0.26[0.09982-0.42723]	0.00160434	0.913898	13	55637545	rs6561816	NARAC	non-risk	C	A	C	280	9	15	368	328	255	446	283	41.3[20.3-83.7]	1.27[0.53-3.02]	32.3[15.9-65.7]	Positive	0.21[0.00567-0.41658]	0.0439938	1
2	196044856	rs72915857	EIRA	non-risk	T	G	T	412	133	33	103	744	451	202	84	7.69[5.56-10.6]	1.00[0.65-1.56]	5.20[4.13-6.55]	Positive	0.32[0.12118-0.52181]	0.00165696	0.943779	2	196044856	rs72915857	NARAC	non-risk	T	G	T	514	17	7	134	615	440	159	98	46.6[26.0-83.5]	1.46[0.57-3.70]	33.2[19.8-55.8]	Positive	0.27[0.03517-0.51785]	0.0247253	1
14	96072078	rs911671	EIRA	non-risk	C	A	C	245	75	94	280	463	303	500	235	6.93[5.12-9.38]	1.07[0.75-1.52]	5.03[3.73-6.77]	Positive	0.26[0.09929-0.42817]	0.00166941	0.945089	14	96072078	rs911671	NARAC	risk	C	A	C	301	10	14	347	306	249	468	289	41.7[21.3-81.6]	1.24[0.52-2.90]	29.9[15.2-58.7]	Positive	0.27[0.09178-0.46301]	0.0033976	1
1	114421313	rs11102691	EIRA	risk	T	C	T	302	87	78	205	497	326	435	197	7.70[5.74-10.3]	1.28[0.89-1.83]	5.36[4.06-7.08]	Positive	0.26[0.09956-0.43427]	0.00177173	0.997086	1	114421313	rs11102691	NARAC	risk	T	C	T	388	12	12	260	421	319	353	219	43.8[23.5-81.6]	1.43[0.61-3.32]	33.7[18.2-62.1]	Positive	0.22[0.01689-0.42729]	0.0338886	1
8	134677040	rs2922502	EIRA	risk	A	G	A	267	85	83	253	446	286	510	237	6.82[5.10-9.13]	1.02[0.72-1.45]	4.99[3.74-6.65]	Positive	0.26[0.09828-0.43089]	0.00181899	1	8	134677040	rs2922502	NARAC	risk	A	G	A	350	12	12	298	390	301	384	237	37.3[20.0-69.6]	1.00[0.43-2.31]	28.2[15.2-52.2]	Positive	0.24[0.04741-0.44345]	0.0151276	1
13	55624191	rs1925050	EIRA	risk	T	G	T	244	74	96	284	396	264	577	277	6.97[5.17-9.40]	1.11[0.78-1.58]	5.04[3.71-6.83]	Positive	0.26[0.09702-0.42581]	0.00182866	1	13	55624191	rs1925050	NARAC	non-risk	T	G	T	279	9	15	369	326	252	448	286	41.1[20.2-83.3]	1.26[0.53-3.01]	32.3[15.8-65.7]	Positive	0.20[0.00081-0.41386]	0.0491023	1
14	96067438	rs1885415	EIRA	risk	C	A	C	217	61	105	303	372	251	577	274	7.49[5.44-10.3]	1.21[0.84-1.74]	5.31[3.82-7.37]	Positive	0.26[0.09709-0.42680]	0.00184329	1	14	96067438	rs1885415	NARAC	non-risk	C	A	C	260	9	15	388	255	205	519	333	36.7[18.2-73.9]	1.08[0.45-2.57]	28.8[14.1-58.8]	Positive	0.21[0.00184-0.42126]	0.048019	1
14	96068252	rs2145973	EIRA	risk	G	A	G	214	60	106	301	364	247	579	276	7.50[5.44-10.3]	1.23[0.85-1.77]	5.30[3.81-7.38]	Positive	0.26[0.09627-0.42705]	0.00192912	1	14	96068252	rs2145973	NARAC	non-risk	G	A	G	260	9	15	388	255	205	519	333	36.7[18.2-73.9]	1.08[0.45-2.57]	28.8[14.1-58.8]	Positive	0.21[0.00184-0.42126]	0.048019	1
3	171214085	rs2111986	EIRA	risk	T	C	T	316	96	74	217	530	339	447	204	7.28[5.48-9.68]	1.11[0.78-1.58]	5.25[4.01-6.86]	Positive	0.26[0.09635-0.42891]	0.00196279	1	3	171214085	rs2111986	NARAC	risk	T	C	T	392	13	11	256	435	323	339	215	39.9[21.8-73.0]	1.18[0.51-2.76]	31.1[17.2-56.2]	Positive	0.21[0.00922-0.42341]	0.0406249	1
13	55624267	rs1925049	EIRA	risk	T	A	T	244	75	96	285	398	264	577	277	6.88[5.11-9.26]	1.09[0.77-1.55]	4.99[3.69-6.76]	Positive	0.25[0.09510-0.42488]	0.00199797	1	13	55624267	rs1925049	NARAC	non-risk	T	A	T	279	9	15	369	326	252	448	286	41.1[20.2-83.3]	1.26[0.53-3.01]	32.3[15.8-65.7]	Positive	0.20[0.00081-0.41386]	0.0491023	1
14	96071125	rs911666	EIRA	non-risk	T	C	T	248	76	95	285	474	307	505	237	6.94[5.14-9.38]	1.06[0.75-1.50]	5.07[3.77-6.82]	Positive	0.25[0.09473-0.42345]	0.00200327	1	14	96071125	rs911666	NARAC	risk	T	C	T	301	10	14	347	306	249	468	289	41.7[21.3-81.6]	1.24[0.52-2.90]	29.9[15.2-58.7]	Positive	0.27[0.09178-0.46301]	0.0033976	1
13	64846244	rs2171353	EIRA	risk	G	C	C	103	20	143	406	150	118	794	392	10.9[6.64-17.9]	1.86[1.11-3.13]	6.87[4.00-11.8]	Positive	0.29[0.10636-0.47567]	0.00200862	1	13	64846244	rs2171353	NARAC	risk	G	C	G	194	6	18	454	185	161	589	377	46.4[19.8-108.]	1.44[0.55-3.80]	31.4[13.1-74.9]	Positive	0.31[0.11678-0.51198]	0.00181845	1
14	96071705	rs911669	EIRA	non-risk	C	T	C	248	76	95	285	474	307	503	236	6.94[5.13-9.37]	1.06[0.75-1.50]	5.07[3.77-6.82]	Positive	0.25[0.09455-0.42355]	0.00202472	1	14	96071705	rs911669	NARAC	risk	C	T	C	301	10	14	347	306	249	468	289	41.7[21.3-81.6]	1.24[0.52-2.90]	29.9[15.2-58.7]	Positive	0.27[0.09178-0.46301]	0.0033976	1
14	96068284	rs2145974	EIRA	risk	A	G	A	219	62	106	304	372	252	578	277	7.38[5.37-10.1]	1.21[0.84-1.73]	5.25[3.79-7.27]	Positive	0.25[0.09484-0.42496]	0.002027	1	14	96068284	rs2145974	NARAC	non-risk	A	G	A	260	9	15	388	255	205	519	333	36.7[18.2-73.9]	1.08[0.45-2.57]	28.8[14.1-58.8]	Positive	0.21[0.00184-0.42126]	0.048019	1
3	171215426	rs918311	EIRA	risk	A	G	A	314	95	74	211	527	339	439	200	7.30[5.48-9.71]	1.14[0.80-1.63]	5.23[4.00-6.84]	Positive	0.26[0.09554-0.42955]	0.00206041	1	3	171215426	rs918311	NARAC	risk	A	G	A	392	13	11	256	435	323	339	215	39.9[21.8-73.0]	1.18[0.51-2.76]	31.1[17.2-56.2]	Positive	0.21[0.00922-0.42341]	0.0406249	1
13	55637071	rs7331189	EIRA	risk	A	T	A	243	75	96	287	398	264	579	279	6.82[5.06-9.18]	1.08[0.76-1.53]	4.96[3.66-6.73]	Positive	0.25[0.09428-0.42419]	0.002068	1	13	55637071	rs7331189	NARAC	non-risk	A	T	A	279	9	15	369	327	255	447	283	41.3[20.4-83.8]	1.26[0.53-3.01]	32.1[15.8-65.3]	Positive	0.21[0.01239-0.42062]	0.0376142	1
3	186588256	rs1501296	EIRA	non-risk	G	A	A	24	6	165	509	41	42	938	502	7.74[3.13-19.1]	1.32[0.53-3.30]	4.13[1.52-11.2]	Positive	0.42[0.15385-0.69318]	0.00208188	1	3	186588256	rs1501296	NARAC	non-risk	G	A	G	369	12	12	279	436	325	338	213	45.7[24.4-85.5]	1.48[0.63-3.42]	33.9[18.3-62.7]	Positive	0.24[0.04863-0.44690]	0.0147423	1
6	87807180	rs2031367	EIRA	non-risk	G	A	A	50	13	148	458	61	54	875	456	7.24[3.88-13.4]	1.19[0.63-2.26]	4.26[2.09-8.71]	Positive	0.38[0.13905-0.62801]	0.00210641	1	6	87807180	rs2031367	NARAC	non-risk	G	A	G	337	10	14	311	388	294	386	244	44.4[22.6-87.3]	1.36[0.58-3.20]	33.2[16.9-64.9]	Positive	0.24[0.04687-0.44193]	0.0153032	1
3	171183876	rs7636098	EIRA	risk	A	T	A	289	86	71	216	489	312	442	201	7.44[5.54-9.99]	1.10[0.77-1.58]	5.36[4.05-7.10]	Positive	0.26[0.09581-0.43377]	0.00213043	1	3	171183876	rs7636098	NARAC	risk	A	T	A	362	12	12	286	404	302	370	236	40.1[21.5-74.7]	1.21[0.52-2.81]	31.4[16.9-58.1]	Positive	0.21[0.00584-0.41708]	0.0438297	1
7	111426041	rs3757646	EIRA	risk	A	G	A	375	106	65	158	649	404	330	140	8.48[6.31-11.3]	1.42[0.99-2.04]	5.71[4.45-7.34]	Positive	0.27[0.09969-0.45221]	0.00215076	1	7	111426041	rs3757646	NARAC	non-risk	A	G	A	456	13	11	192	532	403	242	135	51.9[28.0-96.2]	1.81[0.77-4.24]	36.5[20.3-65.6]	Positive	0.28[0.07252-0.48883]	0.00821934	1
8	133381939	rs6471064	EIRA	non-risk	A	T	T	40	12	158	492	57	52	921	492	6.20[3.21-11.9]	1.04[0.53-2.05]	3.66[1.72-7.74]	Positive	0.40[0.14526-0.65897]	0.00215136	1	8	133381939	rs6471064	NARAC	non-risk	A	T	A	335	13	11	313	385	298	389	240	39.1[21.3-71.8]	1.03[0.44-2.40]	27.7[15.2-50.6]	Positive	0.28[0.10521-0.47461]	0.00209459	1
14	96072339	rs2093420	EIRA	non-risk	T	C	T	248	76	94	285	474	306	503	236	6.94[5.13-9.38]	1.05[0.74-1.49]	5.09[3.79-6.85]	Positive	0.25[0.09306-0.42281]	0.00216686	1	14	96072339	rs2093420	NARAC	risk	T	C	T	301	10	14	347	306	249	468	289	41.7[21.3-81.6]	1.24[0.52-2.90]	29.9[15.2-58.7]	Positive	0.27[0.09178-0.46301]	0.0033976	1
14	96072402	rs2093422	EIRA	non-risk	A	T	A	248	76	94	285	474	306	503	236	6.94[5.13-9.38]	1.05[0.74-1.49]	5.09[3.79-6.85]	Positive	0.25[0.09306-0.42281]	0.00216686	1	14	96072402	rs2093422	NARAC	risk	A	T	A	301	10	14	347	306	248	468	290	41.6[21.3-81.5]	1.24[0.52-2.90]	29.9[15.2-58.9]	Positive	0.27[0.08814-0.46094]	0.00389144	1
14	96072202	rs2104151	EIRA	non-risk	G	C	G	248	76	94	285	474	306	503	236	6.94[5.13-9.38]	1.05[0.74-1.49]	5.09[3.79-6.85]	Positive	0.25[0.09306-0.42281]	0.00216686	1	14	96072202	rs2104151	NARAC	risk	G	C	G	301	10	14	347	306	249	468	289	41.7[21.3-81.6]	1.24[0.52-2.90]	29.9[15.2-58.7]	Positive	0.27[0.09178-0.46301]	0.0033976	1
14	96073032	rs4570771	EIRA	non-risk	G	A	G	248	76	94	285	474	306	503	236	6.94[5.13-9.38]	1.05[0.74-1.49]	5.09[3.79-6.85]	Positive	0.25[0.09306-0.42281]	0.00216686	1	14	96073032	rs4570771	NARAC	risk	G	A	G	301	10	14	347	306	248	468	290	41.6[21.3-81.5]	1.24[0.52-2.90]	29.9[15.2-58.9]	Positive	0.27[0.08814-0.46094]	0.00389144	1
14	96072136	rs911673	EIRA	non-risk	C	T	C	248	76	94	285	474	306	503	236	6.94[5.13-9.38]	1.05[0.74-1.49]	5.09[3.79-6.85]	Positive	0.25[0.09306-0.42281]	0.00216686	1	14	96072136	rs911673	NARAC	risk	C	T	C	301	10	14	347	306	249	468	289	41.7[21.3-81.6]	1.24[0.52-2.90]	29.9[15.2-58.7]	Positive	0.27[0.09178-0.46301]	0.0033976	1
3	171185536	rs9824726	EIRA	risk	G	A	G	291	87	73	217	489	315	447	205	7.35[5.48-9.85]	1.12[0.78-1.61]	5.29[3.99-6.99]	Positive	0.26[0.09496-0.43172]	0.00217314	1	3	171185536	rs9824726	NARAC	risk	G	A	G	362	12	12	286	404	302	370	236	40.1[21.5-74.7]	1.21[0.52-2.81]	31.4[16.9-58.1]	Positive	0.21[0.00584-0.41708]	0.0438297	1
3	171213832	rs6444997	EIRA	risk	G	A	G	316	96	75	217	532	340	447	204	7.28[5.48-9.67]	1.13[0.79-1.60]	5.25[4.01-6.86]	Positive	0.26[0.09383-0.42690]	0.0021814	1	3	171213832	rs6444997	NARAC	risk	G	A	G	392	13	11	256	435	323	339	215	39.9[21.8-73.0]	1.18[0.51-2.76]	31.1[17.2-56.2]	Positive	0.21[0.00922-0.42341]	0.0406249	1
3	171212960	rs7617457	EIRA	risk	A	C	A	316	96	75	217	532	340	447	204	7.28[5.48-9.67]	1.13[0.79-1.60]	5.25[4.01-6.86]	Positive	0.26[0.09383-0.42690]	0.0021814	1	3	171212960	rs7617457	NARAC	risk	A	C	A	392	13	11	256	435	323	339	215	39.9[21.8-73.0]	1.18[0.51-2.76]	31.1[17.2-56.2]	Positive	0.21[0.00922-0.42341]	0.0406249	1
3	171212317	rs918310	EIRA	risk	A	G	A	316	96	75	217	532	340	447	204	7.28[5.48-9.67]	1.13[0.79-1.60]	5.25[4.01-6.86]	Positive	0.26[0.09383-0.42690]	0.0021814	1	3	171212317	rs918310	NARAC	risk	A	G	A	392	13	11	256	435	323	339	215	39.9[21.8-73.0]	1.18[0.51-2.76]	31.1[17.2-56.2]	Positive	0.21[0.00922-0.42341]	0.0406249	1
6	87805210	rs2242602	EIRA	non-risk	T	A	A	50	13	148	457	61	54	877	458	7.22[3.88-13.4]	1.19[0.63-2.26]	4.26[2.09-8.70]	Positive	0.38[0.13761-0.62722]	0.00219999	1	6	87805210	rs2242602	NARAC	non-risk	T	A	T	336	10	14	312	386	294	388	244	44.8[22.8-88.2]	1.35[0.57-3.17]	32.5[16.6-63.7]	Positive	0.26[0.07469-0.45853]	0.00647277	1
13	55626634	rs7986531	EIRA	risk	A	T	A	243	75	96	284	398	264	577	278	6.83[5.07-9.19]	1.09[0.77-1.55]	4.97[3.67-6.73]	Positive	0.25[0.09251-0.42303]	0.00223386	1	13	55626634	rs7986531	NARAC	non-risk	A	T	A	279	9	15	369	326	252	448	286	41.1[20.2-83.3]	1.26[0.53-3.01]	32.3[15.8-65.7]	Positive	0.20[0.00081-0.41386]	0.0491023	1
13	55626505	rs8002665	EIRA	risk	G	C	G	243	75	96	284	398	264	577	278	6.83[5.07-9.19]	1.09[0.77-1.55]	4.97[3.67-6.73]	Positive	0.25[0.09251-0.42303]	0.00223386	1	13	55626505	rs8002665	NARAC	non-risk	G	C	G	279	9	15	369	326	252	448	286	41.1[20.2-83.3]	1.26[0.53-3.01]	32.3[15.8-65.7]	Positive	0.20[0.00081-0.41386]	0.0491023	1
13	55627146	rs9527317	EIRA	risk	C	T	C	243	75	96	284	398	264	577	278	6.83[5.07-9.19]	1.09[0.77-1.55]	4.97[3.67-6.73]	Positive	0.25[0.09251-0.42303]	0.00223386	1	13	55627146	rs9527317	NARAC	non-risk	C	T	C	279	9	15	369	326	252	448	286	41.1[20.2-83.3]	1.26[0.53-3.01]	32.3[15.8-65.7]	Positive	0.20[0.00081-0.41386]	0.0491023	1
13	55628795	rs9536952	EIRA	risk	G	A	G	243	75	96	284	398	264	577	278	6.83[5.07-9.19]	1.09[0.77-1.55]	4.97[3.67-6.73]	Positive	0.25[0.09251-0.42303]	0.00223386	1	13	55628795	rs9536952	NARAC	non-risk	G	A	G	279	9	15	369	326	252	448	286	41.1[20.2-83.3]	1.26[0.53-3.01]	32.3[15.8-65.7]	Positive	0.20[0.00081-0.41386]	0.0491023	1
19	2059585	rs10404242	EIRA	risk	C	T	C	272	85	86	261	464	300	515	244	6.80[5.09-9.08]	1.04[0.73-1.47]	5.01[3.77-6.66]	Positive	0.25[0.09210-0.42197]	0.00225435	1	19	2059585	rs10404242	NARAC	non-risk	C	T	C	311	9	15	337	354	262	420	276	48.0[23.6-97.3]	1.59[0.66-3.78]	36.0[17.7-73.1]	Positive	0.23[0.03844-0.43477]	0.0192698	1
6	87805890	rs2031366	EIRA	non-risk	G	T	T	50	13	148	458	61	54	876	458	7.21[3.87-13.4]	1.19[0.62-2.26]	4.26[2.09-8.70]	Positive	0.38[0.13686-0.62707]	0.00225493	1	6	87805890	rs2031366	NARAC	non-risk	G	T	G	336	10	14	312	386	294	388	244	44.8[22.8-88.2]	1.35[0.57-3.17]	32.5[16.6-63.7]	Positive	0.26[0.07469-0.45853]	0.00647277	1
6	87808289	rs1998615	EIRA	non-risk	G	A	A	50	13	148	458	61	54	875	457	7.22[3.87-13.4]	1.19[0.63-2.26]	4.26[2.09-8.70]	Positive	0.38[0.13682-0.62701]	0.0022568	1	6	87808289	rs1998615	NARAC	non-risk	G	A	G	337	10	14	311	388	294	386	244	44.4[22.6-87.3]	1.36[0.58-3.20]	33.2[16.9-64.9]	Positive	0.24[0.04687-0.44193]	0.0153032	1
6	87808430	rs1998616	EIRA	non-risk	T	A	A	50	13	148	458	61	54	875	457	7.22[3.87-13.4]	1.19[0.63-2.26]	4.26[2.09-8.70]	Positive	0.38[0.13682-0.62701]	0.0022568	1	6	87808430	rs1998616	NARAC	non-risk	T	A	T	337	10	14	311	388	294	386	244	44.4[22.6-87.3]	1.36[0.58-3.20]	33.2[16.9-64.9]	Positive	0.24[0.04687-0.44193]	0.0153032	1
13	55633146	rs9597100	EIRA	risk	C	G	C	245	75	95	277	398	264	569	273	6.91[5.13-9.31]	1.11[0.78-1.58]	5.01[3.70-6.79]	Positive	0.25[0.09176-0.42303]	0.00231996	1	13	55633146	rs9597100	NARAC	non-risk	C	G	C	280	9	15	368	328	255	446	283	41.3[20.3-83.7]	1.27[0.53-3.02]	32.3[15.9-65.7]	Positive	0.21[0.00567-0.41658]	0.0439938	1
6	87805592	rs2031365	EIRA	non-risk	T	C	C	50	13	148	457	61	54	875	458	7.20[3.87-13.4]	1.19[0.63-2.26]	4.26[2.09-8.70]	Positive	0.38[0.13524-0.62622]	0.00236722	1	6	87805592	rs2031365	NARAC	non-risk	T	C	T	336	10	14	312	386	294	388	244	44.8[22.8-88.2]	1.35[0.57-3.17]	32.5[16.6-63.7]	Positive	0.26[0.07469-0.45853]	0.00647277	1
13	55625589	rs9536950	EIRA	risk	T	C	T	243	75	96	284	398	264	576	278	6.81[5.06-9.18]	1.09[0.77-1.55]	4.97[3.67-6.73]	Positive	0.25[0.09108-0.42215]	0.00237784	1	13	55625589	rs9536950	NARAC	non-risk	T	C	T	279	9	15	369	326	252	448	286	41.1[20.2-83.3]	1.26[0.53-3.01]	32.3[15.8-65.7]	Positive	0.20[0.00081-0.41386]	0.0491023	1
13	55623256	rs9527314	EIRA	risk	A	G	A	244	74	96	283	396	262	578	277	6.98[5.18-9.41]	1.11[0.78-1.58]	5.07[3.74-6.88]	Positive	0.25[0.09099-0.42198]	0.00238452	1	13	55623256	rs9527314	NARAC	non-risk	A	G	A	279	9	15	369	326	252	448	286	41.1[20.2-83.3]	1.26[0.53-3.01]	32.3[15.8-65.7]	Positive	0.20[0.00081-0.41386]	0.0491023	1
6	87803671	rs12664322	EIRA	non-risk	C	G	G	51	13	148	457	61	54	876	458	7.37[3.96-13.7]	1.22[0.64-2.31]	4.35[2.13-8.88]	Positive	0.37[0.13422-0.62333]	0.00239934	1	6	87803671	rs12664322	NARAC	non-risk	C	G	C	336	10	14	312	384	293	390	245	45.0[22.9-88.5]	1.35[0.57-3.17]	32.4[16.5-63.4]	Positive	0.27[0.08228-0.46301]	0.00499682	1
6	87804222	rs6924373	EIRA	non-risk	G	A	A	51	13	148	457	61	54	876	458	7.37[3.96-13.7]	1.22[0.64-2.31]	4.35[2.13-8.88]	Positive	0.37[0.13422-0.62333]	0.00239934	1	6	87804222	rs6924373	NARAC	non-risk	G	A	G	336	10	14	312	384	293	390	245	45.0[22.9-88.5]	1.35[0.57-3.17]	32.4[16.5-63.4]	Positive	0.27[0.08228-0.46301]	0.00499682	1
6	87803954	rs6924434	EIRA	non-risk	A	G	G	51	13	148	457	61	54	876	458	7.37[3.96-13.7]	1.22[0.64-2.31]	4.35[2.13-8.88]	Positive	0.37[0.13422-0.62333]	0.00239934	1	6	87803954	rs6924434	NARAC	non-risk	A	G	A	336	10	14	312	384	293	390	245	45.0[22.9-88.5]	1.35[0.57-3.17]	32.4[16.5-63.4]	Positive	0.27[0.08228-0.46301]	0.00499682	1
3	171215507	rs918312	EIRA	risk	A	G	A	313	94	74	211	527	339	438	200	7.34[5.51-9.78]	1.15[0.81-1.64]	5.27[4.03-6.91]	Positive	0.25[0.09189-0.42713]	0.00240974	1	3	171215507	rs918312	NARAC	risk	A	G	A	392	13	11	256	435	323	339	215	39.9[21.8-73.0]	1.18[0.51-2.76]	31.1[17.2-56.2]	Positive	0.21[0.00922-0.42341]	0.0406249	1
3	171183791	rs7645984	EIRA	risk	G	T	G	289	86	71	216	489	311	442	201	7.44[5.54-9.99]	1.10[0.77-1.58]	5.38[4.06-7.13]	Positive	0.26[0.09282-0.43193]	0.0024216	1	3	171183791	rs7645984	NARAC	risk	G	T	G	362	12	12	286	404	302	370	236	40.1[21.5-74.7]	1.21[0.52-2.81]	31.4[16.9-58.1]	Positive	0.21[0.00584-0.41708]	0.0438297	1
8	11450587	rs10903340	EIRA	non-risk	G	T	G	187	46	125	346	347	186	632	358	6.26[4.24-9.25]	1.26[0.82-1.93]	7.72[5.33-11.1]	Negative	-0.2[-0.4539--0.0967]	0.00251408	1	8	11450587	rs10903340	NARAC	risk	G	T	G	427	15	9	221	538	343	236	195	30.7[16.5-57.0]	1.30[0.53-3.20]	37.5[21.5-65.2]	Negative	-0.2[-0.4060--0.0532]	0.0107027	1
13	55623857	rs9527315	EIRA	risk	C	G	C	244	74	96	283	396	262	577	277	6.97[5.17-9.40]	1.11[0.78-1.58]	5.07[3.74-6.88]	Positive	0.25[0.08953-0.42109]	0.00253944	1	13	55623857	rs9527315	NARAC	non-risk	C	G	C	279	9	15	369	326	252	448	286	41.1[20.2-83.3]	1.26[0.53-3.01]	32.3[15.8-65.7]	Positive	0.20[0.00081-0.41386]	0.0491023	1
2	196037587	rs986540	EIRA	non-risk	C	A	C	409	132	33	99	742	451	198	83	7.62[5.50-10.5]	1.04[0.67-1.62]	5.18[4.12-6.53]	Positive	0.31[0.10982-0.51781]	0.00256849	1	2	196037587	rs986540	NARAC	non-risk	C	A	C	514	17	7	134	615	440	159	98	46.6[26.0-83.5]	1.46[0.57-3.70]	33.2[19.8-55.8]	Positive	0.27[0.03517-0.51785]	0.0247253	1
17	13027690	rs2017017	EIRA	non-risk	C	G	G	85	26	140	434	145	109	800	413	6.53[4.11-10.3]	1.06[0.65-1.73]	4.42[2.65-7.37]	Positive	0.31[0.10897-0.51428]	0.00257827	1	17	13027690	rs2017017	NARAC	non-risk	C	G	C	196	7	17	452	229	192	545	346	37.7[17.0-83.4]	1.12[0.44-2.83]	29.2[13.0-65.7]	Positive	0.22[0.00544-0.43536]	0.044465	1
1	201771326	rs12119128	EIRA	risk	A	G	A	259	81	81	247	459	299	471	230	6.64[4.93-8.94]	1.02[0.72-1.46]	4.88[3.65-6.53]	Positive	0.25[0.09068-0.42896]	0.00260532	1	1	201771326	rs12119128	NARAC	risk	A	G	A	320	11	13	328	364	293	410	245	39.2[20.5-75.0]	1.17[0.50-2.71]	30.8[16.1-58.9]	Positive	0.20[0.00391-0.41537]	0.0457939	1
3	39071048	rs17790251	EIRA	non-risk	C	T	T	497	161	6	17	914	514	32	8	12.7[5.72-28.2]	1.10[0.42-2.85]	5.58[4.52-6.88]	Positive	0.55[0.19286-0.91294]	0.00261313	1	3	39071048	rs17790251	NARAC	risk	C	T	C	524	18	6	124	552	421	222	117	43.3[25.0-74.9]	1.46[0.55-3.86]	32.3[19.4-53.7]	Positive	0.24[0.02005-0.46523]	0.0326347	1
13	55632226	rs4619286	EIRA	risk	C	T	C	242	71	97	285	398	264	577	277	7.22[5.34-9.78]	1.16[0.81-1.65]	5.24[3.85-7.13]	Positive	0.25[0.08690-0.41762]	0.0027894	1	13	55632226	rs4619286	NARAC	non-risk	C	T	C	279	9	15	369	327	255	447	283	41.3[20.4-83.8]	1.26[0.53-3.01]	32.1[15.8-65.3]	Positive	0.21[0.01239-0.42062]	0.0376142	1
13	55633674	rs7320921	EIRA	risk	T	C	T	242	71	97	285	398	264	577	277	7.22[5.34-9.78]	1.16[0.81-1.65]	5.24[3.85-7.13]	Positive	0.25[0.08690-0.41762]	0.0027894	1	13	55633674	rs7320921	NARAC	non-risk	T	C	T	279	9	15	369	327	255	447	283	41.3[20.4-83.8]	1.26[0.53-3.01]	32.1[15.8-65.3]	Positive	0.21[0.01239-0.42062]	0.0376142	1
13	55635455	rs7992748	EIRA	risk	A	G	A	242	71	97	285	398	264	577	277	7.22[5.34-9.78]	1.16[0.81-1.65]	5.24[3.85-7.13]	Positive	0.25[0.08690-0.41762]	0.0027894	1	13	55635455	rs7992748	NARAC	non-risk	A	G	A	279	9	15	369	327	255	447	283	41.3[20.4-83.8]	1.26[0.53-3.01]	32.1[15.8-65.3]	Positive	0.21[0.01239-0.42062]	0.0376142	1
2	196032182	rs61377142	EIRA	non-risk	A	G	A	410	133	33	100	743	451	197	83	7.55[5.45-10.4]	1.02[0.66-1.59]	5.17[4.11-6.50]	Positive	0.31[0.10674-0.51644]	0.0028694	1	2	196032182	rs61377142	NARAC	non-risk	A	G	A	514	17	7	134	615	440	159	98	46.6[26.0-83.5]	1.46[0.57-3.70]	33.2[19.8-55.8]	Positive	0.27[0.03517-0.51785]	0.0247253	1
1	201769639	rs2644123	EIRA	risk	C	T	C	268	85	83	256	476	302	480	228	6.80[5.07-9.12]	1.02[0.72-1.45]	5.03[3.78-6.70]	Positive	0.25[0.08744-0.42448]	0.00291053	1	1	201769639	rs2644123	NARAC	risk	C	T	C	320	11	13	328	364	293	410	245	39.2[20.5-75.0]	1.17[0.50-2.71]	30.8[16.1-58.9]	Positive	0.20[0.00391-0.41537]	0.0457939	1
3	171216271	rs9840327	EIRA	risk	A	G	A	312	94	73	208	526	339	435	200	7.26[5.45-9.68]	1.15[0.81-1.64]	5.25[4.00-6.87]	Positive	0.25[0.08722-0.42459]	0.00294472	1	3	171216271	rs9840327	NARAC	risk	A	G	A	392	13	11	256	435	323	339	215	39.9[21.8-73.0]	1.18[0.51-2.76]	31.1[17.2-56.2]	Positive	0.21[0.00922-0.42341]	0.0406249	1
3	171216104	rs9878164	EIRA	risk	G	A	G	312	94	73	208	526	339	435	200	7.26[5.45-9.68]	1.15[0.81-1.64]	5.25[4.00-6.87]	Positive	0.25[0.08722-0.42459]	0.00294472	1	3	171216104	rs9878164	NARAC	risk	G	A	G	392	13	11	256	435	323	339	215	39.9[21.8-73.0]	1.18[0.51-2.76]	31.1[17.2-56.2]	Positive	0.21[0.00922-0.42341]	0.0406249	1
3	171216362	rs9878352	EIRA	risk	C	A	C	312	94	73	208	526	339	435	200	7.26[5.45-9.68]	1.15[0.81-1.64]	5.25[4.00-6.87]	Positive	0.25[0.08722-0.42459]	0.00294472	1	3	171216362	rs9878352	NARAC	risk	C	A	C	392	13	11	256	435	323	339	215	39.9[21.8-73.0]	1.18[0.51-2.76]	31.1[17.2-56.2]	Positive	0.21[0.00922-0.42341]	0.0406249	1
3	171216274	rs9878450	EIRA	risk	G	A	G	312	94	73	208	526	339	435	200	7.26[5.45-9.68]	1.15[0.81-1.64]	5.25[4.00-6.87]	Positive	0.25[0.08722-0.42459]	0.00294472	1	3	171216274	rs9878450	NARAC	risk	G	A	G	392	13	11	256	435	323	339	215	39.9[21.8-73.0]	1.18[0.51-2.76]	31.1[17.2-56.2]	Positive	0.21[0.00922-0.42341]	0.0406249	1
17	11602552	rs62061778	EIRA	risk	T	C	T	363	117	54	158	622	378	337	147	7.26[5.45-9.67]	1.08[0.74-1.57]	5.22[4.08-6.68]	Positive	0.26[0.09170-0.44736]	0.00297005	1	17	11602552	rs62061778	NARAC	non-risk	T	C	T	432	14	10	216	507	373	267	165	44.8[24.7-81.1]	1.29[0.55-3.05]	31.8[18.0-56.2]	Positive	0.28[0.08032-0.48379]	0.00613549	1
13	55626779	rs7986762	EIRA	risk	A	T	A	243	71	97	283	398	264	577	277	7.26[5.37-9.83]	1.17[0.82-1.67]	5.27[3.87-7.17]	Positive	0.25[0.08516-0.41616]	0.00299106	1	13	55626779	rs7986762	NARAC	non-risk	A	T	A	279	9	15	369	326	252	448	286	41.1[20.2-83.3]	1.26[0.53-3.01]	32.3[15.8-65.7]	Positive	0.20[0.00081-0.41386]	0.0491023	1
17	11602011	rs11650039	EIRA	risk	C	A	C	363	117	54	158	622	378	337	147	7.26[5.45-9.67]	1.08[0.74-1.57]	5.22[4.08-6.68]	Positive	0.26[0.09147-0.44725]	0.00299901	1	17	11602011	rs11650039	NARAC	non-risk	C	A	C	432	14	10	216	508	373	266	165	44.6[24.6-80.8]	1.29[0.55-3.05]	31.9[18.0-56.4]	Positive	0.27[0.07421-0.48043]	0.00744668	1
3	171215939	rs10936693	EIRA	risk	G	A	G	312	94	73	209	527	339	435	200	7.26[5.45-9.68]	1.15[0.80-1.63]	5.26[4.01-6.88]	Positive	0.25[0.08677-0.42427]	0.00299906	1	3	171215939	rs10936693	NARAC	risk	G	A	G	392	13	11	256	435	323	339	215	39.9[21.8-73.0]	1.18[0.51-2.76]	31.1[17.2-56.2]	Positive	0.21[0.00922-0.42341]	0.0406249	1
3	171217561	rs2131017	EIRA	risk	C	T	C	311	94	73	205	524	338	434	199	7.26[5.44-9.67]	1.17[0.82-1.66]	5.23[3.99-6.85]	Positive	0.25[0.08630-0.42457]	0.0030745	1	3	171217561	rs2131017	NARAC	risk	C	T	C	397	13	11	251	436	325	338	213	40.5[22.2-74.0]	1.21[0.52-2.81]	31.2[17.3-56.5]	Positive	0.22[0.01770-0.42887]	0.0332673	1
20	7444850	rs11906982	EIRA	risk	G	C	C	27	7	162	506	19	21	959	522	7.42[3.19-17.2]	1.27[0.54-2.98]	3.53[1.24-10.0]	Positive	0.48[0.16449-0.81046]	0.00309393	1	20	7444850	rs11906982	NARAC	non-risk	G	C	G	427	16	8	221	497	381	277	157	41.3[23.5-72.5]	1.04[0.42-2.54]	28.8[16.8-49.3]	Positive	0.30[0.10799-0.49606]	0.00228139	1
1	102453599	rs10782865	EIRA	risk	T	A	A	409	128	43	123	715	433	258	109	7.65[5.67-10.3]	1.10[0.74-1.65]	5.34[4.23-6.75]	Positive	0.28[0.09690-0.47760]	0.00309796	1	1	102453599	rs10782865	NARAC	non-risk	A	T	A	476	15	9	172	564	416	210	122	53.1[29.4-96.1]	1.99[0.83-4.76]	36.1[20.8-62.6]	Positive	0.30[0.09077-0.51236]	0.00504671	1
18	1623185	rs8099579	EIRA	non-risk	A	C	A	318	98	66	193	582	363	342	156	7.28[5.41-9.80]	1.09[0.76-1.56]	5.24[4.03-6.81]	Positive	0.26[0.09024-0.44487]	0.00310029	1	18	1623185	rs8099579	NARAC	non-risk	A	C	A	389	14	10	259	452	346	322	192	38.7[21.5-69.8]	1.09[0.46-2.57]	30.1[16.9-53.4]	Positive	0.22[0.01315-0.42956]	0.0371749	1
2	18091654	rs10186418	EIRA	risk	G	A	G	354	107	58	166	608	376	345	152	7.57[5.66-10.1]	1.14[0.79-1.65]	5.41[4.20-6.97]	Positive	0.26[0.08935-0.44257]	0.00316121	1	2	18091654	rs10186418	NARAC	non-risk	G	A	G	474	16	8	174	541	393	233	145	44.6[25.2-78.7]	1.58[0.64-3.87]	33.8[19.8-57.7]	Positive	0.22[0.00356-0.45193]	0.0464658	1
2	18092471	rs13396005	EIRA	risk	T	C	T	354	107	58	166	608	376	345	152	7.57[5.66-10.1]	1.14[0.79-1.65]	5.41[4.20-6.97]	Positive	0.26[0.08935-0.44257]	0.00316121	1	2	18092471	rs13396005	NARAC	non-risk	T	C	T	474	16	8	174	541	393	233	145	44.6[25.2-78.7]	1.58[0.64-3.87]	33.8[19.8-57.7]	Positive	0.22[0.00356-0.45193]	0.0464658	1
13	55630035	rs7320070	EIRA	risk	A	T	A	242	71	97	285	398	264	577	278	7.20[5.32-9.74]	1.16[0.81-1.65]	5.24[3.85-7.14]	Positive	0.24[0.08360-0.41538]	0.00320074	1	13	55630035	rs7320070	NARAC	non-risk	A	T	A	279	9	15	369	327	255	447	283	41.3[20.4-83.8]	1.26[0.53-3.01]	32.1[15.8-65.3]	Positive	0.21[0.01239-0.42062]	0.0376142	1
13	55629601	rs9597097	EIRA	risk	G	A	G	242	71	97	285	398	264	577	278	7.20[5.32-9.74]	1.16[0.81-1.65]	5.24[3.85-7.14]	Positive	0.24[0.08360-0.41538]	0.00320074	1	13	55629601	rs9597097	NARAC	non-risk	G	A	G	279	9	15	369	327	255	447	283	41.3[20.4-83.8]	1.26[0.53-3.01]	32.1[15.8-65.3]	Positive	0.21[0.01239-0.42062]	0.0376142	1
13	55627491	rs7324339	EIRA	risk	A	T	A	244	71	97	284	398	264	578	278	7.27[5.38-9.84]	1.17[0.82-1.67]	5.29[3.88-7.20]	Positive	0.24[0.08337-0.41472]	0.00321564	1	13	55627491	rs7324339	NARAC	non-risk	A	T	A	279	9	15	369	326	252	448	286	41.1[20.2-83.3]	1.26[0.53-3.01]	32.3[15.8-65.7]	Positive	0.20[0.00081-0.41386]	0.0491023	1
13	55620668	rs7989387	EIRA	risk	G	A	G	244	71	94	278	396	264	565	273	7.25[5.36-9.82]	1.16[0.81-1.66]	5.27[3.87-7.18]	Positive	0.25[0.08371-0.41712]	0.00323671	1	13	55620668	rs7989387	NARAC	non-risk	G	A	G	279	9	15	369	326	252	448	286	41.1[20.2-83.3]	1.26[0.53-3.01]	32.3[15.8-65.7]	Positive	0.20[0.00081-0.41386]	0.0491023	1
3	68606548	rs7616164	EIRA	risk	T	G	G	48	15	151	459	70	60	860	464	5.97[3.30-10.8]	1.04[0.56-1.91]	3.70[1.88-7.29]	Positive	0.37[0.12474-0.62206]	0.0032478	1	3	68606548	rs7616164	NARAC	risk	T	G	T	328	8	16	320	343	255	431	283	54.2[25.9-113.]	1.99[0.82-4.83]	41.8[19.9-87.8]	Positive	0.21[0.00686-0.41334]	0.0427402	1
2	207979050	rs2244399	EIRA	risk	C	T	T	25	6	160	500	19	22	941	506	8.03[3.23-19.9]	1.36[0.54-3.41]	3.81[1.27-11.3]	Positive	0.48[0.16049-0.80053]	0.00325042	1	2	207979050	rs2244399	NARAC	risk	C	T	C	473	14	10	175	492	399	282	139	55.6[30.7-100.]	2.00[0.84-4.71]	35.0[19.8-61.8]	Positive	0.35[0.16980-0.53500]	0.000155143	0.413351
3	171227756	rs2075361	EIRA	risk	T	G	T	285	85	80	222	462	305	473	221	7.21[5.38-9.66]	1.20[0.84-1.71]	5.18[3.90-6.88]	Positive	0.25[0.08428-0.42173]	0.00329153	1	3	171227756	rs2075361	NARAC	non-risk	T	G	T	343	11	13	305	389	291	385	247	42.3[22.2-80.6]	1.31[0.56-3.04]	32.3[17.0-61.4]	Positive	0.22[0.02628-0.42918]	0.0267088	1
13	55630225	rs7319409	EIRA	risk	A	G	A	241	71	97	284	396	262	574	276	7.19[5.31-9.73]	1.16[0.81-1.65]	5.23[3.84-7.13]	Positive	0.24[0.08312-0.41592]	0.00329178	1	13	55630225	rs7319409	NARAC	non-risk	A	G	A	279	9	15	369	327	255	447	283	41.3[20.4-83.8]	1.26[0.53-3.01]	32.1[15.8-65.3]	Positive	0.21[0.01239-0.42062]	0.0376142	1
13	55627451	rs7322770	EIRA	risk	G	A	G	243	71	97	284	398	264	577	278	7.23[5.35-9.79]	1.17[0.82-1.66]	5.27[3.87-7.17]	Positive	0.24[0.08223-0.41421]	0.00337822	1	13	55627451	rs7322770	NARAC	non-risk	G	A	G	279	9	15	369	326	252	448	286	41.1[20.2-83.3]	1.26[0.53-3.01]	32.3[15.8-65.7]	Positive	0.20[0.00081-0.41386]	0.0491023	1
13	55627470	rs7323261	EIRA	risk	C	G	C	243	71	97	284	398	264	577	278	7.23[5.35-9.79]	1.17[0.82-1.66]	5.27[3.87-7.17]	Positive	0.24[0.08223-0.41421]	0.00337822	1	13	55627470	rs7323261	NARAC	non-risk	C	G	C	279	9	15	369	326	252	448	286	41.1[20.2-83.3]	1.26[0.53-3.01]	32.3[15.8-65.7]	Positive	0.20[0.00081-0.41386]	0.0491023	1
13	55626716	rs7985677	EIRA	risk	T	G	T	243	71	97	284	398	264	577	278	7.23[5.35-9.79]	1.17[0.82-1.66]	5.27[3.87-7.17]	Positive	0.24[0.08223-0.41421]	0.00337822	1	13	55626716	rs7985677	NARAC	non-risk	T	G	T	279	9	15	369	326	252	448	286	41.1[20.2-83.3]	1.26[0.53-3.01]	32.3[15.8-65.7]	Positive	0.20[0.00081-0.41386]	0.0491023	1
13	55628918	rs7999619	EIRA	risk	C	T	C	243	71	97	284	398	264	577	278	7.23[5.35-9.79]	1.17[0.82-1.66]	5.27[3.87-7.17]	Positive	0.24[0.08223-0.41421]	0.00337822	1	13	55628918	rs7999619	NARAC	non-risk	C	T	C	279	9	15	369	326	252	448	286	41.1[20.2-83.3]	1.26[0.53-3.01]	32.3[15.8-65.7]	Positive	0.20[0.00081-0.41386]	0.0491023	1
13	55626441	rs8002628	EIRA	risk	T	C	T	243	71	97	284	398	264	577	278	7.23[5.35-9.79]	1.17[0.82-1.66]	5.27[3.87-7.17]	Positive	0.24[0.08223-0.41421]	0.00337822	1	13	55626441	rs8002628	NARAC	non-risk	T	C	T	279	9	15	369	326	252	448	286	41.1[20.2-83.3]	1.26[0.53-3.01]	32.3[15.8-65.7]	Positive	0.20[0.00081-0.41386]	0.0491023	1
13	55628535	rs9536951	EIRA	risk	G	A	G	243	71	97	284	398	264	577	278	7.23[5.35-9.79]	1.17[0.82-1.66]	5.27[3.87-7.17]	Positive	0.24[0.08223-0.41421]	0.00337822	1	13	55628535	rs9536951	NARAC	non-risk	G	A	G	279	9	15	369	326	252	448	286	41.1[20.2-83.3]	1.26[0.53-3.01]	32.3[15.8-65.7]	Positive	0.20[0.00081-0.41386]	0.0491023	1
2	47317631	rs3739098	EIRA	risk	G	A	G	375	117	54	158	649	396	330	148	7.31[5.49-9.74]	1.07[0.74-1.56]	5.28[4.14-6.74]	Positive	0.26[0.08793-0.44522]	0.00344679	1	2	47317631	rs3739098	NARAC	risk	G	A	G	466	16	8	182	519	389	255	149	42.1[24.0-74.0]	1.16[0.47-2.86]	30.4[17.8-51.9]	Positive	0.27[0.06738-0.48013]	0.00932299	1
3	171216755	rs10490809	EIRA	risk	G	A	G	308	90	73	206	513	335	428	199	7.38[5.52-9.87]	1.19[0.83-1.70]	5.31[4.04-6.99]	Positive	0.25[0.08338-0.42316]	0.00347788	1	3	171216755	rs10490809	NARAC	risk	G	A	G	392	13	11	256	435	323	339	215	39.9[21.8-73.0]	1.18[0.51-2.76]	31.1[17.2-56.2]	Positive	0.21[0.00922-0.42341]	0.0406249	1
1	153974621	rs6701341	EIRA	non-risk	T	C	C	47	14	151	455	82	68	853	446	6.46[3.51-11.8]	1.10[0.58-2.06]	4.07[2.06-8.04]	Positive	0.35[0.11615-0.59178]	0.00353084	1	1	153974621	rs6701341	NARAC	non-risk	T	C	C	580	18	6	68	700	502	74	36	58.5[30.1-113.]	2.30[0.84-6.28]	35.8[21.7-59.0]	Positive	0.36[0.06113-0.67116]	0.0186293	1
3	171216653	rs13326995	EIRA	risk	G	A	G	312	94	73	208	526	339	433	200	7.23[5.42-9.63]	1.15[0.81-1.64]	5.25[4.01-6.87]	Positive	0.25[0.08273-0.42188]	0.00354193	1	3	171216653	rs13326995	NARAC	risk	G	A	G	392	13	11	256	435	323	339	215	39.9[21.8-73.0]	1.18[0.51-2.76]	31.1[17.2-56.2]	Positive	0.21[0.00922-0.42341]	0.0406249	1
13	55623727	rs1925051	EIRA	risk	A	T	A	244	70	97	283	396	262	578	277	7.41[5.47-10.0]	1.19[0.84-1.70]	5.38[3.94-7.33]	Positive	0.24[0.08079-0.41325]	0.00358431	1	13	55623727	rs1925051	NARAC	non-risk	A	T	A	279	9	15	369	326	252	448	286	41.1[20.2-83.3]	1.26[0.53-3.01]	32.3[15.8-65.7]	Positive	0.20[0.00081-0.41386]	0.0491023	1
13	55623217	rs9527313	EIRA	risk	A	G	A	244	70	97	283	396	262	578	277	7.41[5.47-10.0]	1.19[0.84-1.70]	5.38[3.94-7.33]	Positive	0.24[0.08079-0.41325]	0.00358431	1	13	55623217	rs9527313	NARAC	non-risk	A	G	A	279	9	15	369	326	252	448	286	41.1[20.2-83.3]	1.26[0.53-3.01]	32.3[15.8-65.7]	Positive	0.20[0.00081-0.41386]	0.0491023	1
13	55623053	rs9536948	EIRA	risk	T	C	T	244	70	97	283	396	262	578	277	7.41[5.47-10.0]	1.19[0.84-1.70]	5.38[3.94-7.33]	Positive	0.24[0.08079-0.41325]	0.00358431	1	13	55623053	rs9536948	NARAC	non-risk	T	C	T	279	9	15	369	326	252	448	286	41.1[20.2-83.3]	1.26[0.53-3.01]	32.3[15.8-65.7]	Positive	0.20[0.00081-0.41386]	0.0491023	1
1	116279406	rs10737731	EIRA	non-risk	A	C	A	234	76	90	276	416	266	542	264	6.49[4.81-8.76]	1.00[0.70-1.43]	4.85[3.58-6.56]	Positive	0.25[0.08230-0.42212]	0.00362045	1	1	116279406	rs10737731	NARAC	non-risk	A	C	A	351	10	14	297	432	317	342	221	54.7[27.7-107.]	2.10[0.89-4.93]	41.4[21.2-80.9]	Positive	0.22[0.02128-0.42465]	0.0302442	1
3	171219787	rs2160991	EIRA	risk	A	G	A	310	94	73	205	524	337	433	199	7.22[5.41-9.62]	1.16[0.81-1.66]	5.23[3.99-6.85]	Positive	0.25[0.08216-0.42211]	0.00364444	1	3	171219787	rs2160991	NARAC	risk	A	G	A	397	13	11	251	436	325	338	213	40.5[22.2-74.0]	1.21[0.52-2.81]	31.2[17.3-56.5]	Positive	0.22[0.01770-0.42887]	0.0332673	1
3	171218646	rs6444999	EIRA	risk	T	G	T	310	94	73	205	524	337	433	199	7.22[5.41-9.62]	1.16[0.81-1.66]	5.23[3.99-6.85]	Positive	0.25[0.08216-0.42211]	0.00364444	1	3	171218646	rs6444999	NARAC	risk	T	G	T	397	13	11	251	436	325	338	213	40.5[22.2-74.0]	1.21[0.52-2.81]	31.2[17.3-56.5]	Positive	0.22[0.01770-0.42887]	0.0332673	1
3	171220318	rs6764402	EIRA	risk	C	T	C	310	94	73	205	524	337	433	199	7.22[5.41-9.62]	1.16[0.81-1.66]	5.23[3.99-6.85]	Positive	0.25[0.08216-0.42211]	0.00364444	1	3	171220318	rs6764402	NARAC	risk	C	T	C	397	13	11	251	437	326	337	212	40.6[22.2-74.1]	1.21[0.52-2.81]	31.2[17.3-56.4]	Positive	0.22[0.01936-0.42999]	0.0319655	1
3	171219916	rs6776407	EIRA	risk	A	C	A	310	94	73	205	524	337	433	199	7.22[5.41-9.62]	1.16[0.81-1.66]	5.23[3.99-6.85]	Positive	0.25[0.08216-0.42211]	0.00364444	1	3	171219916	rs6776407	NARAC	risk	A	C	A	397	13	11	251	437	325	337	213	40.4[22.1-73.9]	1.21[0.52-2.81]	31.3[17.3-56.5]	Positive	0.22[0.01481-0.42726]	0.035656	1
3	171220550	rs6779592	EIRA	risk	A	T	A	310	94	73	205	524	337	433	199	7.22[5.41-9.62]	1.16[0.81-1.66]	5.23[3.99-6.85]	Positive	0.25[0.08216-0.42211]	0.00364444	1	3	171220550	rs6779592	NARAC	risk	A	T	A	397	13	11	251	437	326	337	212	40.6[22.2-74.1]	1.21[0.52-2.81]	31.2[17.3-56.4]	Positive	0.22[0.01936-0.42999]	0.0319655	1
3	171220350	rs9844361	EIRA	risk	T	C	T	310	94	73	205	524	337	433	199	7.22[5.41-9.62]	1.16[0.81-1.66]	5.23[3.99-6.85]	Positive	0.25[0.08216-0.42211]	0.00364444	1	3	171220350	rs9844361	NARAC	risk	T	C	T	397	13	11	251	437	326	337	212	40.6[22.2-74.1]	1.21[0.52-2.81]	31.2[17.3-56.4]	Positive	0.22[0.01936-0.42999]	0.0319655	1
13	64851186	rs7334696	EIRA	risk	T	C	C	109	22	147	410	158	125	796	405	10.0[6.27-16.2]	1.81[1.10-2.98]	6.51[3.88-10.9]	Positive	0.27[0.08905-0.45939]	0.00370096	1	13	64851186	rs7334696	NARAC	risk	T	C	T	194	6	18	454	185	161	589	377	46.4[19.8-108.]	1.44[0.55-3.80]	31.4[13.1-74.9]	Positive	0.31[0.11678-0.51198]	0.00181845	1
13	64849082	rs9598762	EIRA	risk	T	C	C	109	22	147	410	158	125	796	405	10.0[6.27-16.2]	1.81[1.10-2.98]	6.51[3.88-10.9]	Positive	0.27[0.08905-0.45939]	0.00370096	1	13	64849082	rs9598762	NARAC	risk	T	C	T	194	6	18	454	185	161	589	377	46.4[19.8-108.]	1.44[0.55-3.80]	31.4[13.1-74.9]	Positive	0.31[0.11678-0.51198]	0.00181845	1
20	7456223	rs6140293	EIRA	risk	C	G	G	27	7	164	500	19	21	949	519	7.36[3.17-17.1]	1.30[0.55-3.05]	3.52[1.24-9.98]	Positive	0.48[0.15604-0.80559]	0.00371148	1	20	7456223	rs6140293	NARAC	non-risk	C	G	C	431	16	8	217	500	377	274	161	40.2[22.9-70.4]	1.06[0.43-2.59]	29.4[17.2-50.4]	Positive	0.26[0.06160-0.46887]	0.0106807	1
3	171222288	rs2011429	EIRA	risk	T	A	T	310	94	73	204	524	337	433	199	7.22[5.41-9.62]	1.17[0.82-1.67]	5.23[3.99-6.85]	Positive	0.25[0.08131-0.42153]	0.00376831	1	3	171222288	rs2011429	NARAC	risk	T	A	T	397	14	10	251	437	326	337	212	37.4[20.8-67.2]	1.00[0.42-2.35]	28.8[16.2-51.1]	Positive	0.22[0.02509-0.43437]	0.0277816	1
3	171223959	rs9290419	EIRA	risk	A	G	A	310	94	73	204	524	337	433	199	7.22[5.41-9.62]	1.17[0.82-1.67]	5.23[3.99-6.85]	Positive	0.25[0.08131-0.42153]	0.00376831	1	3	171223959	rs9290419	NARAC	risk	A	G	A	397	14	10	251	437	326	337	212	37.4[20.8-67.2]	1.00[0.42-2.35]	28.8[16.2-51.1]	Positive	0.22[0.02509-0.43437]	0.0277816	1
3	171218153	rs6805871	EIRA	risk	C	T	C	304	91	70	200	508	327	430	198	7.28[5.44-9.74]	1.15[0.80-1.66]	5.28[4.02-6.95]	Positive	0.25[0.08077-0.42345]	0.00392578	1	3	171218153	rs6805871	NARAC	risk	C	T	C	397	13	11	251	436	325	338	213	40.5[22.2-74.0]	1.21[0.52-2.81]	31.2[17.3-56.5]	Positive	0.22[0.01770-0.42887]	0.0332673	1
17	13026203	rs10521210	EIRA	non-risk	C	T	T	87	28	143	446	158	116	821	428	6.14[3.93-9.60]	1.00[0.63-1.61]	4.29[2.62-7.04]	Positive	0.29[0.09548-0.50246]	0.00397986	1	17	13026203	rs10521210	NARAC	non-risk	C	T	C	199	7	17	449	228	193	546	345	38.9[17.6-85.9]	1.15[0.46-2.91]	29.2[13.0-65.5]	Positive	0.24[0.03649-0.45266]	0.0212392	1
13	55622263	rs7335167	EIRA	risk	C	T	C	244	70	97	283	396	262	576	277	7.38[5.45-10.0]	1.19[0.84-1.70]	5.38[3.94-7.33]	Positive	0.24[0.07777-0.41138]	0.00405472	1	13	55622263	rs7335167	NARAC	non-risk	C	T	C	279	9	15	369	326	252	448	286	41.1[20.2-83.3]	1.26[0.53-3.01]	32.3[15.8-65.7]	Positive	0.20[0.00081-0.41386]	0.0491023	1
17	11611213	rs8079335	EIRA	risk	C	T	C	362	117	54	158	620	377	336	148	7.18[5.39-9.56]	1.08[0.74-1.57]	5.21[4.07-6.67]	Positive	0.26[0.08350-0.44213]	0.004069	1	17	11611213	rs8079335	NARAC	non-risk	C	T	C	441	14	10	207	512	380	262	158	45.9[25.3-83.4]	1.30[0.55-3.07]	31.7[18.0-56.1]	Positive	0.30[0.10304-0.50019]	0.00290936	1
3	171224161	rs1565567	EIRA	risk	A	T	A	310	94	73	204	524	337	432	199	7.20[5.40-9.60]	1.17[0.82-1.67]	5.23[3.99-6.85]	Positive	0.24[0.07936-0.42036]	0.00407454	1	3	171224161	rs1565567	NARAC	risk	A	T	A	397	14	10	251	437	326	337	212	37.4[20.8-67.2]	1.00[0.42-2.35]	28.8[16.2-51.1]	Positive	0.22[0.02509-0.43437]	0.0277816	1
13	64848106	rs9528735	EIRA	risk	C	T	T	108	22	147	410	158	124	799	406	10.0[6.23-16.1]	1.80[1.09-2.96]	6.50[3.87-10.9]	Positive	0.27[0.08567-0.45792]	0.00420772	1	13	64848106	rs9528735	NARAC	risk	C	T	C	194	6	18	454	185	161	589	377	46.4[19.8-108.]	1.44[0.55-3.80]	31.4[13.1-74.9]	Positive	0.31[0.11678-0.51198]	0.00181845	1
11	104696624	rs2162340	EIRA	non-risk	A	G	G	32	10	160	493	60	53	908	484	6.02[2.92-12.3]	1.02[0.49-2.13]	3.66[1.64-8.19]	Positive	0.38[0.12090-0.65261]	0.00435335	1	11	104696624	rs2162340	NARAC	risk	A	G	A	390	11	13	258	424	328	350	210	46.8[24.5-89.5]	1.60[0.69-3.72]	36.0[19.0-68.1]	Positive	0.21[0.01389-0.42379]	0.0363579	1
17	11610875	rs72810873	EIRA	risk	G	A	G	363	117	54	158	621	377	336	148	7.19[5.40-9.58]	1.08[0.74-1.57]	5.23[4.09-6.69]	Positive	0.26[0.08159-0.44083]	0.0043661	1	17	11610875	rs72810873	NARAC	non-risk	G	A	G	441	14	10	207	512	380	262	158	45.9[25.3-83.4]	1.30[0.55-3.07]	31.7[18.0-56.1]	Positive	0.30[0.10304-0.50019]	0.00290936	1
13	55633224	rs9591635	EIRA	risk	A	T	A	242	70	98	285	396	263	574	278	7.26[5.36-9.84]	1.19[0.83-1.69]	5.31[3.89-7.24]	Positive	0.24[0.07576-0.40998]	0.00439082	1	13	55633224	rs9591635	NARAC	non-risk	A	T	A	279	9	15	369	327	255	447	283	41.3[20.4-83.8]	1.26[0.53-3.01]	32.1[15.8-65.3]	Positive	0.21[0.01239-0.42062]	0.0376142	1
1	102442925	rs4908210	EIRA	risk	A	C	C	405	128	43	123	717	431	259	110	7.54[5.59-10.1]	1.09[0.73-1.64]	5.34[4.23-6.74]	Positive	0.27[0.08704-0.47113]	0.00439424	1	1	102442925	rs4908210	NARAC	non-risk	C	A	C	476	15	9	172	564	415	210	123	52.5[29.0-94.8]	1.99[0.83-4.75]	36.2[20.9-62.8]	Positive	0.29[0.07725-0.50435]	0.00760729	1
13	55625485	rs7995320	EIRA	risk	C	T	C	243	71	97	282	398	264	572	277	7.20[5.32-9.74]	1.17[0.82-1.67]	5.27[3.87-7.17]	Positive	0.24[0.07575-0.41029]	0.00440337	1	13	55625485	rs7995320	NARAC	non-risk	C	T	C	279	9	15	369	326	252	448	286	41.1[20.2-83.3]	1.26[0.53-3.01]	32.3[15.8-65.7]	Positive	0.20[0.00081-0.41386]	0.0491023	1
1	102447624	rs10430070	EIRA	risk	T	G	G	410	128	43	123	720	433	259	110	7.64[5.66-10.3]	1.11[0.74-1.66]	5.40[4.27-6.82]	Positive	0.27[0.08636-0.47036]	0.00448731	1	1	102447624	rs10430070	NARAC	non-risk	G	T	G	476	15	9	172	564	415	210	123	52.5[29.0-94.8]	1.99[0.83-4.75]	36.2[20.9-62.8]	Positive	0.29[0.07725-0.50435]	0.00760729	1
11	104693123	rs1944899	EIRA	non-risk	G	A	A	27	7	160	478	53	49	894	475	7.15[3.08-16.5]	1.24[0.53-2.92]	4.15[1.65-10.4]	Positive	0.38[0.11890-0.65007]	0.00454737	1	11	104693123	rs1944899	NARAC	risk	G	A	G	390	11	13	258	424	328	350	210	46.8[24.5-89.5]	1.60[0.69-3.72]	36.0[19.0-68.1]	Positive	0.21[0.01389-0.42379]	0.0363579	1
9	73722022	rs972387	EIRA	risk	T	A	A	24	8	162	495	35	35	931	504	5.74[2.54-12.9]	1.00[0.44-2.29]	3.20[1.26-8.14]	Positive	0.44[0.13597-0.74554]	0.00459084	1	9	73722022	rs972387	NARAC	non-risk	T	A	T	406	13	11	242	493	375	281	163	47.2[25.6-87.3]	1.62[0.69-3.77]	35.4[19.6-64.0]	Positive	0.23[0.02839-0.44424]	0.0259009	1
3	171242600	rs260775	EIRA	risk	G	C	G	262	80	90	271	434	283	541	260	6.92[5.16-9.28]	1.09[0.77-1.55]	5.15[3.84-6.90]	Positive	0.24[0.07450-0.40999]	0.00464671	1	3	171242600	rs260775	NARAC	non-risk	G	C	G	316	10	14	332	343	255	431	283	42.2[21.6-82.5]	1.33[0.56-3.11]	32.6[16.6-63.7]	Positive	0.22[0.01854-0.42388]	0.0324102	1
1	102453403	rs10874530	EIRA	risk	C	T	T	407	128	43	124	710	427	264	113	7.53[5.59-10.1]	1.09[0.73-1.63]	5.36[4.24-6.77]	Positive	0.27[0.08482-0.46753]	0.00467217	1	1	102453403	rs10874530	NARAC	non-risk	T	C	T	476	15	9	172	564	416	210	122	53.1[29.4-96.1]	1.99[0.83-4.76]	36.1[20.8-62.6]	Positive	0.30[0.09077-0.51236]	0.00504671	1
1	153966081	rs12564669	EIRA	non-risk	C	G	G	47	14	150	459	82	67	857	448	6.45[3.50-11.8]	1.08[0.57-2.02]	4.12[2.08-8.14]	Positive	0.34[0.10689-0.58924]	0.00467291	1	1	153966081	rs12564669	NARAC	non-risk	C	G	G	580	18	6	68	700	502	74	36	58.5[30.1-113.]	2.30[0.84-6.28]	35.8[21.7-59.0]	Positive	0.36[0.06113-0.67116]	0.0186293	1
1	153988152	rs6679907	EIRA	non-risk	A	C	C	48	14	151	456	81	67	860	451	6.57[3.58-12.0]	1.12[0.60-2.10]	4.18[2.11-8.24]	Positive	0.34[0.10563-0.58530]	0.00475315	1	1	153988152	rs6679907	NARAC	non-risk	A	C	C	580	18	6	68	701	504	73	34	60.0[30.7-117.]	2.35[0.86-6.42]	35.8[21.7-59.1]	Positive	0.38[0.07671-0.68373]	0.0140737	1
1	153987412	rs10796986	EIRA	non-risk	A	G	G	48	14	151	456	81	67	859	451	6.57[3.57-12.0]	1.12[0.60-2.10]	4.18[2.11-8.24]	Positive	0.34[0.10438-0.58472]	0.00492598	1	1	153987412	rs10796986	NARAC	non-risk	A	G	G	580	18	6	68	701	504	73	34	60.0[30.7-117.]	2.35[0.86-6.42]	35.8[21.7-59.1]	Positive	0.38[0.07671-0.68373]	0.0140737	1
1	153986637	rs11264865	EIRA	non-risk	G	C	C	48	14	150	452	81	67	859	451	6.57[3.58-12.0]	1.12[0.60-2.10]	4.18[2.12-8.25]	Positive	0.34[0.10406-0.58442]	0.00496659	1	1	153986637	rs11264865	NARAC	non-risk	G	C	C	580	18	6	68	701	504	73	34	60.0[30.7-117.]	2.35[0.86-6.42]	35.8[21.7-59.1]	Positive	0.38[0.07671-0.68373]	0.0140737	1
1	153987050	rs11264866	EIRA	non-risk	A	G	G	48	14	150	452	81	67	859	451	6.57[3.58-12.0]	1.12[0.60-2.10]	4.18[2.12-8.25]	Positive	0.34[0.10406-0.58442]	0.00496659	1	1	153987050	rs11264866	NARAC	non-risk	A	G	G	580	18	6	68	701	504	73	34	60.0[30.7-117.]	2.35[0.86-6.42]	35.8[21.7-59.1]	Positive	0.38[0.07671-0.68373]	0.0140737	1
18	43237433	rs1944335	EIRA	risk	C	G	C	375	122	46	138	651	401	298	134	6.96[5.20-9.31]	1.03[0.69-1.52]	5.07[3.99-6.45]	Positive	0.26[0.08041-0.45289]	0.00501148	1	18	43237433	rs1944335	NARAC	risk	C	G	C	452	14	10	196	528	396	246	142	48.0[26.4-87.3]	1.79[0.75-4.22]	36.2[20.5-63.7]	Positive	0.23[0.01099-0.45079]	0.0395899	1
2	207915717	rs11893020	EIRA	non-risk	A	G	G	55	16	152	469	54	48	922	494	6.81[3.82-12.1]	1.16[0.64-2.11]	4.10[2.06-8.16]	Positive	0.37[0.11229-0.63338]	0.00503492	1	2	207915717	rs11893020	NARAC	risk	A	G	A	359	10	14	289	362	289	412	249	47.6[24.3-93.1]	1.64[0.70-3.84]	36.2[18.5-70.8]	Positive	0.22[0.02483-0.42708]	0.0276625	1
3	171241762	rs400721	EIRA	risk	C	T	C	261	80	91	272	433	282	546	262	6.90[5.15-9.25]	1.10[0.77-1.55]	5.14[3.83-6.90]	Positive	0.24[0.07219-0.40828]	0.00507717	1	3	171241762	rs400721	NARAC	non-risk	C	T	C	316	10	14	332	343	255	431	283	42.2[21.6-82.5]	1.33[0.56-3.11]	32.6[16.6-63.7]	Positive	0.22[0.01854-0.42388]	0.0324102	1
1	153981639	rs61542760	EIRA	non-risk	A	G	G	48	14	150	453	81	67	859	452	6.56[3.57-12.0]	1.12[0.60-2.10]	4.18[2.12-8.25]	Positive	0.34[0.10236-0.58371]	0.00521129	1	1	153981639	rs61542760	NARAC	non-risk	A	G	G	580	18	6	68	701	504	73	34	60.0[30.7-117.]	2.35[0.86-6.42]	35.8[21.7-59.1]	Positive	0.38[0.07671-0.68373]	0.0140737	1
1	153980341	rs6703545	EIRA	non-risk	T	C	C	48	14	150	453	81	67	859	452	6.56[3.57-12.0]	1.12[0.60-2.10]	4.18[2.12-8.25]	Positive	0.34[0.10236-0.58371]	0.00521129	1	1	153980341	rs6703545	NARAC	non-risk	T	C	C	583	18	6	65	702	502	72	36	57.8[29.7-112.]	2.36[0.86-6.47]	35.9[21.8-59.3]	Positive	0.35[0.04110-0.66620]	0.026571	1
1	102435130	rs1415096	EIRA	risk	G	A	A	411	128	43	122	721	434	258	110	7.62[5.65-10.2]	1.12[0.75-1.68]	5.41[4.28-6.83]	Positive	0.27[0.08167-0.46769]	0.00528044	1	1	102435130	rs1415096	NARAC	non-risk	G	A	A	476	15	9	172	565	414	209	124	51.6[28.5-93.3]	1.99[0.83-4.75]	36.4[21.0-63.1]	Positive	0.27[0.05774-0.49334]	0.0131504	1
5	155374925	rs62380670	EIRA	risk	C	T	C	394	125	42	124	703	425	249	107	7.40[5.46-10.0]	1.05[0.70-1.57]	5.29[4.18-6.70]	Positive	0.27[0.08246-0.47262]	0.00529427	1	5	155374925	rs62380670	NARAC	non-risk	C	T	C	454	14	10	194	539	404	235	134	48.5[26.7-88.1]	1.56[0.66-3.68]	34.0[19.3-59.9]	Positive	0.28[0.08060-0.49369]	0.00643223	1
19	45923653	rs11615	EIRA	non-risk	G	A	A	69	23	148	464	118	91	861	453	6.02[3.68-9.85]	1.00[0.59-1.66]	4.13[2.38-7.16]	Positive	0.31[0.09262-0.53533]	0.00543316	1	19	45923653	rs11615	NARAC	non-risk	G	A	G	252	8	16	396	282	209	492	329	44.6[21.2-94.1]	1.41[0.58-3.44]	33.6[15.8-71.4]	Positive	0.23[0.03653-0.43858]	0.0205436	1
3	28039559	rs1506691	EIRA	non-risk	G	T	T	46	13	157	482	65	57	903	486	6.83[3.60-12.9]	1.18[0.61-2.27]	4.21[2.04-8.68]	Positive	0.35[0.10438-0.60744]	0.00554708	1	3	28039559	rs1506691	NARAC	non-risk	G	T	G	319	12	12	329	362	268	412	270	36.6[19.6-68.3]	1.00[0.43-2.33]	28.1[15.1-52.5]	Positive	0.22[0.02928-0.43033]	0.024686	1
6	44642884	rs9472321	EIRA	non-risk	G	C	C	493	153	12	22	893	507	54	14	12.3[6.65-22.8]	1.77[0.85-3.68]	5.75[4.65-7.12]	Positive	0.47[0.13781-0.80277]	0.00556382	1	6	44642884	rs9472321	NARAC	non-risk	G	C	G	417	16	8	231	473	356	301	182	39.7[22.6-69.4]	1.03[0.42-2.52]	28.9[16.8-49.6]	Positive	0.26[0.07115-0.46763]	0.00773329	1
2	196052692	rs12990397	EIRA	non-risk	G	A	G	366	113	46	142	652	403	280	127	7.32[5.42-9.88]	1.05[0.71-1.57]	5.31[4.15-6.80]	Positive	0.26[0.07769-0.45474]	0.00564509	1	2	196052692	rs12990397	NARAC	non-risk	G	A	G	454	15	9	194	555	404	219	134	45.6[25.3-82.1]	1.41[0.59-3.39]	33.2[19.2-57.7]	Positive	0.26[0.04141-0.48025]	0.0198065	1
3	171240585	rs260776	EIRA	risk	C	A	C	261	79	87	269	429	278	541	260	6.98[5.20-9.37]	1.07[0.75-1.52]	5.24[3.90-7.04]	Positive	0.23[0.06919-0.40805]	0.00577244	1	3	171240585	rs260776	NARAC	non-risk	C	A	C	316	10	14	332	343	255	431	283	42.2[21.6-82.5]	1.33[0.56-3.11]	32.6[16.6-63.7]	Positive	0.22[0.01854-0.42388]	0.0324102	1
13	55634108	rs7323215	EIRA	risk	C	T	C	254	71	87	259	411	271	523	253	7.51[5.54-10.1]	1.20[0.83-1.72]	5.52[4.06-7.49]	Positive	0.23[0.06845-0.40862]	0.00598106	1	13	55634108	rs7323215	NARAC	non-risk	C	T	C	279	9	15	369	327	255	447	283	41.3[20.4-83.8]	1.26[0.53-3.01]	32.1[15.8-65.3]	Positive	0.21[0.01239-0.42062]	0.0376142	1
3	171248592	rs260773	EIRA	risk	T	C	T	262	79	89	268	431	282	533	258	6.93[5.16-9.30]	1.11[0.78-1.57]	5.18[3.85-6.95]	Positive	0.23[0.06801-0.40621]	0.00598983	1	3	171248592	rs260773	NARAC	non-risk	T	C	T	316	10	14	332	343	255	431	283	42.2[21.6-82.5]	1.33[0.56-3.11]	32.6[16.6-63.7]	Positive	0.22[0.01854-0.42388]	0.0324102	1
9	73640149	rs28477145	EIRA	risk	T	C	C	27	8	163	502	37	36	933	503	6.49[2.91-14.4]	1.12[0.49-2.53]	3.68[1.47-9.21]	Positive	0.41[0.11887-0.71065]	0.00600585	1	9	73640149	rs28477145	NARAC	non-risk	T	C	T	404	13	11	244	501	378	273	160	46.6[25.2-86.2]	1.61[0.69-3.75]	35.7[19.8-64.5]	Positive	0.22[0.00784-0.43467]	0.0421504	1
3	171218848	rs6445002	EIRA	risk	G	T	G	306	93	73	205	520	333	429	199	7.13[5.34-9.52]	1.16[0.81-1.65]	5.25[4.00-6.89]	Positive	0.24[0.06880-0.41456]	0.00614345	1	3	171218848	rs6445002	NARAC	risk	G	T	G	397	13	11	251	436	325	338	213	40.5[22.2-74.0]	1.21[0.52-2.81]	31.2[17.3-56.5]	Positive	0.22[0.01770-0.42887]	0.0332673	1
1	20964066	rs3102072	EIRA	non-risk	G	A	A	432	137	34	94	807	413	157	124	3.99[2.93-5.42]	1.16[0.74-1.80]	6.32[5.03-7.94]	Negative	-0.6[-1.0717--0.1775]	0.00617121	1	1	20964066	rs3102072	NARAC	risk	G	A	G	405	12	12	243	506	315	268	223	30.6[16.4-57.0]	1.69[0.73-3.94]	48.3[26.1-89.2]	Negative	-0.6[-1.0290--0.1728]	0.00593658	1
2	196046543	rs59522947	EIRA	non-risk	G	A	G	358	116	49	146	641	396	289	131	6.99[5.19-9.41]	1.05[0.71-1.55]	5.09[3.98-6.52]	Positive	0.26[0.07467-0.45133]	0.00619629	1	2	196046543	rs59522947	NARAC	non-risk	G	A	G	456	16	8	192	554	404	220	134	43.3[24.4-76.9]	1.20[0.49-2.95]	31.3[18.3-53.5]	Positive	0.27[0.05592-0.48848]	0.013634	1
3	28039368	rs6804917	EIRA	non-risk	C	A	A	46	13	158	487	66	57	913	487	6.90[3.64-13.0]	1.17[0.61-2.26]	4.29[2.08-8.84]	Positive	0.35[0.09989-0.60384]	0.00619957	1	3	28039368	rs6804917	NARAC	non-risk	C	A	C	319	12	12	329	362	268	412	270	36.6[19.6-68.3]	1.00[0.43-2.33]	28.1[15.1-52.5]	Positive	0.22[0.02928-0.43033]	0.024686	1
8	10786543	rs11250092	EIRA	non-risk	G	A	A	118	40	124	405	204	121	742	403	6.62[4.33-10.1]	1.07[0.68-1.69]	5.04[3.29-7.72]	Positive	0.22[0.06413-0.38838]	0.00623166	1	8	10786543	rs11250092	NARAC	risk	G	A	G	454	18	6	194	573	387	201	151	40.1[22.0-73.1]	1.00[0.37-2.71]	29.7[17.9-49.5]	Positive	0.25[0.13455-0.38078]	4.09347e-05	0.122705
1	102440926	rs10874529	EIRA	risk	T	C	C	404	125	43	122	712	427	258	110	7.66[5.66-10.3]	1.12[0.75-1.69]	5.45[4.31-6.90]	Positive	0.27[0.07660-0.46492]	0.00627132	1	1	102440926	rs10874529	NARAC	non-risk	C	T	C	476	15	9	172	564	415	210	123	52.5[29.0-94.8]	1.99[0.83-4.75]	36.2[20.9-62.8]	Positive	0.29[0.07725-0.50435]	0.00760729	1
1	102427608	rs12737750	EIRA	risk	C	T	T	393	121	42	119	701	418	252	106	7.80[5.74-10.6]	1.14[0.75-1.72]	5.53[4.35-7.02]	Positive	0.27[0.07700-0.46934]	0.00634536	1	1	102427608	rs12737750	NARAC	non-risk	C	T	T	476	15	9	172	565	415	209	123	52.3[28.9-94.6]	1.99[0.83-4.75]	36.2[20.9-62.9]	Positive	0.28[0.07354-0.50264]	0.0084914	1
3	171221253	rs6780305	EIRA	risk	A	G	A	295	86	72	202	500	325	425	199	7.35[5.47-9.88]	1.20[0.83-1.73]	5.36[4.05-7.10]	Positive	0.24[0.06801-0.41524]	0.00637566	1	3	171221253	rs6780305	NARAC	risk	A	G	A	397	14	10	251	437	326	337	212	37.4[20.8-67.2]	1.00[0.42-2.35]	28.8[16.2-51.1]	Positive	0.22[0.02509-0.43437]	0.0277816	1
3	171226045	rs7651813	EIRA	risk	G	A	G	311	90	81	222	528	337	451	207	7.58[5.68-10.1]	1.25[0.88-1.78]	5.52[4.20-7.26]	Positive	0.23[0.06648-0.40661]	0.00640646	1	3	171226045	rs7651813	NARAC	risk	G	A	G	384	12	12	264	414	315	360	223	45.1[24.2-84.1]	1.43[0.61-3.32]	32.9[17.8-60.7]	Positive	0.26[0.06797-0.45507]	0.00808885	1
16	53877489	rs2388407	EIRA	risk	A	T	T	445	140	25	63	843	435	111	98	3.73[2.67-5.22]	1.26[0.76-2.10]	6.29[5.02-7.88]	Negative	-0.7[-1.3025--0.2112]	0.00655017	1	16	53877489	rs2388407	NARAC	non-risk	A	T	A	446	14	10	202	554	371	220	167	31.2[17.2-56.4]	1.78[0.75-4.20]	43.7[24.7-77.3]	Negative	-0.4[-0.8224--0.0260]	0.0367607	1
1	102438176	rs4908209	EIRA	risk	A	C	C	404	125	43	122	713	427	258	110	7.66[5.66-10.3]	1.13[0.75-1.69]	5.46[4.32-6.91]	Positive	0.26[0.07526-0.46409]	0.00655231	1	1	102438176	rs4908209	NARAC	non-risk	C	A	C	476	15	9	172	564	415	210	123	52.5[29.0-94.8]	1.99[0.83-4.75]	36.2[20.9-62.8]	Positive	0.29[0.07725-0.50435]	0.00760729	1
1	102436638	rs945644	EIRA	risk	C	A	A	404	125	43	122	713	427	258	110	7.66[5.66-10.3]	1.13[0.75-1.69]	5.46[4.32-6.91]	Positive	0.26[0.07526-0.46411]	0.0065524	1	1	102436638	rs945644	NARAC	non-risk	C	A	A	476	15	9	172	564	415	210	123	52.5[29.0-94.8]	1.99[0.83-4.75]	36.2[20.9-62.8]	Positive	0.29[0.07725-0.50435]	0.00760729	1
17	11611795	rs11655363	EIRA	risk	G	C	G	360	115	52	156	617	368	335	147	7.27[5.45-9.70]	1.06[0.72-1.55]	5.37[4.18-6.88]	Positive	0.25[0.07054-0.43510]	0.00655762	1	17	11611795	rs11655363	NARAC	non-risk	G	C	G	441	14	10	207	512	380	262	158	45.9[25.3-83.4]	1.30[0.55-3.07]	31.7[18.0-56.1]	Positive	0.30[0.10304-0.50019]	0.00290936	1
6	77382409	rs35026597	EIRA	risk	C	T	T	22	6	159	497	18	20	923	510	6.66[2.67-16.5]	1.15[0.45-2.90]	3.28[1.08-9.93]	Positive	0.48[0.13476-0.83269]	0.00658913	1	6	77382409	rs35026597	NARAC	non-risk	C	T	C	438	15	9	210	508	390	266	148	38.7[21.7-69.0]	1.03[0.43-2.46]	29.9[17.2-51.9]	Positive	0.22[0.00967-0.44375]	0.0406212	1
13	55638510	rs7983137	EIRA	risk	C	G	C	238	70	96	276	396	261	557	270	7.11[5.24-9.65]	1.18[0.82-1.68]	5.25[3.85-7.17]	Positive	0.23[0.06527-0.40571]	0.00669593	1	13	55638510	rs7983137	NARAC	non-risk	C	G	C	279	9	15	369	328	255	446	283	41.3[20.3-83.7]	1.26[0.53-3.01]	32.1[15.8-65.4]	Positive	0.21[0.00973-0.41904]	0.040046	1
17	71280722	rs12795	EIRA	non-risk	C	T	T	73	22	149	460	102	81	877	463	6.19[3.79-10.1]	1.04[0.62-1.73]	4.19[2.39-7.35]	Positive	0.31[0.08784-0.54630]	0.00670553	1	17	71280722	rs12795	NARAC	risk	C	T	C	275	9	15	373	295	238	479	300	39.5[19.5-79.6]	1.11[0.46-2.64]	28.0[13.8-56.8]	Positive	0.28[0.10144-0.47499]	0.00248974	1
2	18092018	rs6747325	EIRA	risk	A	G	A	353	106	58	166	605	371	343	153	7.52[5.62-10.0]	1.15[0.79-1.67]	5.49[4.26-7.09]	Positive	0.24[0.06852-0.42966]	0.0068551	1	2	18092018	rs6747325	NARAC	non-risk	A	G	A	474	16	8	174	541	393	233	145	44.6[25.2-78.7]	1.58[0.64-3.87]	33.8[19.8-57.7]	Positive	0.22[0.00356-0.45193]	0.0464658	1
1	20946261	rs1781458	EIRA	non-risk	T	C	C	430	132	34	93	804	412	155	121	4.15[3.04-5.67]	1.20[0.77-1.87]	6.50[5.16-8.18]	Negative	-0.6[-1.0606--0.1663]	0.00716292	1	1	20946261	rs1781458	NARAC	non-risk	T	C	T	409	13	11	239	509	317	265	221	28.3[15.5-51.8]	1.45[0.62-3.38]	44.5[24.6-80.6]	Negative	-0.5[-1.0132--0.1623]	0.00677212	1
2	196045856	rs2375241	EIRA	risk	T	C	T	339	102	68	193	600	373	375	171	7.46[5.59-9.96]	1.19[0.83-1.70]	5.46[4.22-7.08]	Positive	0.24[0.06535-0.41844]	0.00723972	1	2	196045856	rs2375241	NARAC	non-risk	T	C	T	417	13	11	231	491	358	283	180	45.4[24.6-83.6]	1.41[0.60-3.28]	33.3[18.5-60.1]	Positive	0.25[0.05174-0.45977]	0.0140061	1
3	37818620	rs2276002	EIRA	non-risk	G	A	G	334	106	65	199	604	370	375	174	6.91[5.19-9.20]	1.02[0.71-1.46]	5.21[4.04-6.73]	Positive	0.24[0.06530-0.41810]	0.00724109	1	3	37818620	rs2276002	NARAC	risk	G	A	G	440	11	13	208	478	388	296	150	61.2[31.8-117.]	2.79[1.19-6.49]	44.2[23.5-83.4]	Positive	0.24[0.04127-0.45304]	0.0186261	1
20	7423259	rs17399218	EIRA	risk	C	A	A	27	7	163	506	19	20	957	521	7.40[3.19-17.1]	1.27[0.54-3.00]	3.68[1.29-10.4]	Positive	0.46[0.12534-0.80396]	0.00727401	1	20	7423259	rs17399218	NARAC	non-risk	C	A	C	427	16	8	221	497	381	277	157	41.3[23.5-72.5]	1.04[0.42-2.54]	28.8[16.8-49.3]	Positive	0.30[0.10799-0.49606]	0.00228139	1
1	20947678	rs1781453	EIRA	non-risk	T	G	G	434	135	34	94	811	417	154	121	4.08[3.00-5.57]	1.17[0.76-1.83]	6.40[5.10-8.05]	Negative	-0.6[-1.0584--0.1648]	0.00729068	1	1	20947678	rs1781453	NARAC	non-risk	T	G	T	409	13	11	239	509	317	265	221	28.3[15.5-51.8]	1.45[0.62-3.38]	44.5[24.6-80.6]	Negative	-0.5[-1.0132--0.1623]	0.00677212	1
5	130164625	rs3981404	EIRA	non-risk	G	A	G	291	94	71	212	541	344	388	183	6.58[4.91-8.83]	1.03[0.72-1.47]	4.95[3.78-6.49]	Positive	0.24[0.06472-0.42046]	0.00751365	1	5	130164625	rs3981404	NARAC	non-risk	G	A	G	391	11	13	257	467	354	307	184	48.5[25.3-92.9]	1.68[0.72-3.91]	37.2[19.7-70.3]	Positive	0.21[0.00786-0.42679]	0.0419906	1
2	18093915	rs1461951	EIRA	risk	G	C	G	344	105	57	169	582	360	350	160	7.21[5.39-9.64]	1.09[0.75-1.58]	5.34[4.13-6.90]	Positive	0.24[0.06567-0.42683]	0.00752273	1	2	18093915	rs1461951	NARAC	non-risk	G	C	G	474	16	8	174	541	393	233	145	44.6[25.2-78.7]	1.58[0.64-3.87]	33.8[19.8-57.7]	Positive	0.22[0.00356-0.45193]	0.0464658	1
6	77384098	rs35905493	EIRA	risk	T	C	C	23	6	162	499	18	20	926	513	6.93[2.80-17.1]	1.22[0.49-3.07]	3.42[1.13-10.3]	Positive	0.47[0.12590-0.82060]	0.00757467	1	6	77384098	rs35905493	NARAC	non-risk	T	C	T	439	15	9	209	508	390	266	148	38.8[21.8-69.3]	1.04[0.43-2.48]	30.0[17.3-52.1]	Positive	0.22[0.00939-0.44350]	0.0408725	1
6	77384346	rs55815849	EIRA	risk	A	G	G	23	6	162	499	18	20	926	513	6.93[2.80-17.1]	1.22[0.49-3.07]	3.42[1.13-10.3]	Positive	0.47[0.12590-0.82060]	0.00757467	1	6	77384346	rs55815849	NARAC	non-risk	A	G	A	439	15	9	209	508	390	266	148	38.8[21.8-69.3]	1.04[0.43-2.48]	30.0[17.3-52.1]	Positive	0.22[0.00939-0.44350]	0.0408725	1
5	179016882	rs7715391	EIRA	non-risk	T	C	C	71	20	145	448	124	95	824	434	6.70[4.02-11.1]	1.12[0.65-1.91]	4.60[2.61-8.10]	Positive	0.29[0.07858-0.51316]	0.00761077	1	5	179016882	rs7715391	NARAC	risk	T	C	T	259	9	15	389	286	240	488	298	38.3[18.9-77.6]	1.09[0.46-2.60]	28.4[13.9-58.0]	Positive	0.25[0.05799-0.45089]	0.0111294	1
14	38164318	rs10139826	EIRA	risk	C	T	T	94	29	136	418	147	109	793	408	6.39[4.13-9.88]	1.05[0.66-1.67]	4.51[2.77-7.34]	Positive	0.28[0.07560-0.49393]	0.00762019	1	14	38164318	rs10139826	NARAC	non-risk	C	T	C	214	6	18	434	218	194	556	344	53.0[22.6-124.]	1.77[0.67-4.66]	38.6[16.2-91.9]	Positive	0.25[0.05204-0.46081]	0.013928	1
6	77384586	rs34342081	EIRA	risk	C	T	T	23	6	162	497	18	20	926	513	6.94[2.80-17.1]	1.23[0.49-3.08]	3.42[1.13-10.3]	Positive	0.47[0.12542-0.81995]	0.00763292	1	6	77384586	rs34342081	NARAC	non-risk	C	T	C	439	15	9	209	508	390	266	148	38.8[21.8-69.3]	1.04[0.43-2.48]	30.0[17.3-52.1]	Positive	0.22[0.00939-0.44350]	0.0408725	1
6	77385023	rs34653597	EIRA	risk	A	G	G	23	6	162	497	18	20	926	513	6.94[2.80-17.1]	1.23[0.49-3.08]	3.42[1.13-10.3]	Positive	0.47[0.12542-0.81995]	0.00763292	1	6	77385023	rs34653597	NARAC	non-risk	A	G	A	439	15	9	209	505	391	269	147	39.3[22.0-70.2]	1.04[0.43-2.48]	29.8[17.1-51.8]	Positive	0.24[0.02756-0.45369]	0.0268599	1
3	171248991	rs260771	EIRA	risk	A	G	A	261	79	90	269	430	281	535	260	6.88[5.13-9.23]	1.11[0.78-1.58]	5.17[3.85-6.95]	Positive	0.23[0.06103-0.40160]	0.00775469	1	3	171248991	rs260771	NARAC	non-risk	A	G	A	316	10	14	332	343	255	431	283	42.2[21.6-82.5]	1.33[0.56-3.11]	32.6[16.6-63.7]	Positive	0.22[0.01854-0.42388]	0.0324102	1
7	54614585	rs657449	EIRA	non-risk	G	A	G	177	53	110	337	296	198	647	324	6.80[4.85-9.53]	1.08[0.74-1.58]	5.06[3.54-7.24]	Positive	0.24[0.06391-0.42090]	0.00777116	1	7	54614585	rs657449	NARAC	risk	G	A	G	264	8	16	384	271	223	503	315	40.3[19.2-84.4]	1.15[0.47-2.80]	28.2[13.4-59.6]	Positive	0.29[0.10864-0.48219]	0.00193483	1
6	87795863	rs7745823	EIRA	non-risk	T	G	G	41	11	148	464	49	43	894	474	6.91[3.51-13.5]	1.14[0.57-2.28]	4.17[1.90-9.13]	Positive	0.37[0.09889-0.65169]	0.00778347	1	6	87795863	rs7745823	NARAC	non-risk	T	G	T	392	11	13	256	446	336	328	202	47.0[24.5-90.2]	1.53[0.66-3.57]	35.3[18.6-66.9]	Positive	0.23[0.03351-0.44012]	0.0224231	1
2	207980844	rs2244166	EIRA	risk	A	G	G	25	6	156	484	21	23	908	497	7.88[3.18-19.5]	1.36[0.54-3.43]	3.99[1.35-11.7]	Positive	0.44[0.11763-0.77614]	0.00780803	1	2	207980844	rs2244166	NARAC	risk	A	G	A	445	14	10	203	470	381	304	157	51.5[28.5-92.9]	1.77[0.75-4.16]	33.9[19.1-60.0]	Positive	0.32[0.14096-0.51033]	0.000548134	0.848551
16	80798949	rs57000437	EIRA	risk	T	C	T	453	138	30	66	792	459	169	64	9.11[6.43-12.9]	1.53[0.95-2.45]	5.78[4.61-7.23]	Positive	0.30[0.08077-0.53404]	0.00784782	1	16	80798949	rs57000437	NARAC	non-risk	T	C	T	523	16	8	125	642	470	132	68	56.4[30.5-104.]	2.25[0.90-5.59]	36.9[21.7-62.6]	Positive	0.32[0.07492-0.57312]	0.0107877	1
19	45913093	rs1007616	EIRA	non-risk	C	T	T	76	25	145	456	125	95	851	446	6.09[3.79-9.76]	1.00[0.61-1.64]	4.26[2.50-7.24]	Positive	0.29[0.07855-0.51974]	0.00786022	1	19	45913093	rs1007616	NARAC	non-risk	C	T	C	240	8	16	408	273	199	501	339	42.9[20.3-90.4]	1.35[0.55-3.30]	33.2[15.6-70.7]	Positive	0.21[0.00853-0.42448]	0.0413108	1
19	45908461	rs10412761	EIRA	non-risk	G	A	A	76	25	145	452	125	95	842	440	6.09[3.79-9.76]	1.01[0.61-1.66]	4.25[2.50-7.23]	Positive	0.29[0.07840-0.51947]	0.00788928	1	19	45908461	rs10412761	NARAC	non-risk	G	A	G	240	8	16	408	274	198	500	340	42.7[20.3-90.2]	1.35[0.55-3.30]	33.4[15.7-71.0]	Positive	0.21[0.00183-0.42052]	0.0480165	1
1	20947368	rs1689914	EIRA	non-risk	G	A	A	426	132	34	85	803	411	149	115	4.16[3.04-5.71]	1.30[0.83-2.04]	6.45[5.12-8.13]	Negative	-0.6[-1.0823--0.1631]	0.00790816	1	1	20947368	rs1689914	NARAC	non-risk	G	A	G	409	13	11	239	509	317	265	221	28.3[15.5-51.8]	1.45[0.62-3.38]	44.5[24.6-80.6]	Negative	-0.5[-1.0132--0.1623]	0.00677212	1
2	196047666	rs10931686	EIRA	risk	A	C	A	339	102	68	193	600	373	374	171	7.44[5.58-9.93]	1.19[0.83-1.70]	5.47[4.22-7.08]	Positive	0.23[0.06263-0.41683]	0.00797228	1	2	196047666	rs10931686	NARAC	non-risk	A	C	A	415	13	11	233	494	362	280	176	45.7[24.7-84.2]	1.43[0.61-3.35]	33.7[18.7-60.7]	Positive	0.25[0.04802-0.45761]	0.0155359	1
7	123940656	rs73231995	EIRA	risk	T	C	T	429	134	30	92	752	447	194	84	7.74[5.59-10.7]	1.04[0.66-1.65]	5.47[4.35-6.87]	Positive	0.28[0.07497-0.49914]	0.0079796	1	7	123940656	rs73231995	NARAC	non-risk	T	C	T	486	14	10	162	587	432	187	106	63.0[33.9-116.]	2.39[1.01-5.66]	38.5[21.8-67.8]	Positive	0.36[0.16608-0.56590]	0.000332775	0.551195
1	20945520	rs552722	EIRA	non-risk	C	A	A	433	136	33	93	813	417	155	121	4.06[2.98-5.53]	1.14[0.73-1.78]	6.35[5.06-7.98]	Negative	-0.5[-1.0422--0.1558]	0.00806548	1	1	20945520	rs552722	NARAC	non-risk	C	A	C	409	13	11	239	509	317	265	221	28.3[15.5-51.8]	1.45[0.62-3.38]	44.5[24.6-80.6]	Negative	-0.5[-1.0132--0.1623]	0.00677212	1
1	20977449	rs512550	EIRA	non-risk	G	T	T	422	123	36	97	774	402	164	126	4.43[3.25-6.04]	1.28[0.82-1.97]	6.72[5.31-8.51]	Negative	-0.5[-1.0077--0.1496]	0.00819649	1	1	20977449	rs512550	NARAC	risk	G	T	G	406	13	11	242	507	318	267	220	28.7[15.7-52.5]	1.43[0.61-3.33]	43.9[24.2-79.4]	Negative	-0.5[-0.9555--0.1287]	0.0101553	1
13	64848965	rs11148642	EIRA	risk	T	G	G	107	20	146	407	156	121	793	402	10.9[6.68-18.0]	1.96[1.17-3.29]	7.20[4.21-12.3]	Positive	0.25[0.06594-0.44534]	0.00825847	1	13	64848965	rs11148642	NARAC	risk	T	G	T	194	6	18	454	185	161	589	377	46.4[19.8-108.]	1.44[0.55-3.80]	31.4[13.1-74.9]	Positive	0.31[0.11678-0.51198]	0.00181845	1
6	44640911	rs4711796	EIRA	non-risk	A	G	G	486	153	12	22	886	501	53	14	11.8[6.38-22.0]	1.73[0.83-3.60]	5.69[4.59-7.05]	Positive	0.45[0.11802-0.79893]	0.0083029	1	6	44640911	rs4711796	NARAC	non-risk	A	G	A	417	16	8	231	473	356	301	182	39.7[22.6-69.4]	1.03[0.42-2.52]	28.9[16.8-49.6]	Positive	0.26[0.07115-0.46763]	0.00773329	1
4	90211779	rs2005104	EIRA	non-risk	T	C	C	477	143	28	56	871	454	108	90	4.03[2.87-5.66]	1.60[0.97-2.63]	6.47[5.19-8.06]	Negative	-0.7[-1.3095--0.1931]	0.00833429	1	4	90211779	rs2005104	NARAC	non-risk	T	C	T	403	14	10	245	486	318	288	220	28.9[16.0-52.0]	1.22[0.52-2.86]	39.2[22.0-69.8]	Negative	-0.3[-0.7238--0.0020]	0.0487113	1
16	80800283	rs16953974	EIRA	risk	C	A	C	454	138	29	65	792	459	168	64	9.06[6.39-12.8]	1.50[0.93-2.43]	5.79[4.62-7.24]	Positive	0.30[0.07836-0.53308]	0.0084	1	16	80800283	rs16953974	NARAC	non-risk	C	A	C	524	16	8	124	642	470	132	68	56.4[30.6-104.]	2.25[0.90-5.60]	36.9[21.7-62.6]	Positive	0.32[0.07474-0.57314]	0.0108369	1
1	102437579	rs1415097	EIRA	risk	A	G	G	402	124	43	121	710	426	256	110	7.61[5.63-10.3]	1.14[0.76-1.71]	5.46[4.31-6.91]	Positive	0.26[0.06755-0.46003]	0.00842088	1	1	102437579	rs1415097	NARAC	non-risk	G	A	G	476	15	9	172	564	415	210	123	52.5[29.0-94.8]	1.99[0.83-4.75]	36.2[20.9-62.8]	Positive	0.29[0.07725-0.50435]	0.00760729	1
21	36819003	rs2834934	EIRA	risk	G	T	G	338	99	72	195	572	358	407	186	7.63[5.74-10.1]	1.27[0.89-1.82]	5.57[4.28-7.24]	Positive	0.23[0.05974-0.40782]	0.00846734	1	21	36819003	rs2834934	NARAC	non-risk	G	T	G	413	12	12	235	490	371	284	167	47.9[25.5-90.1]	1.62[0.69-3.77]	36.0[19.5-66.2]	Positive	0.23[0.02672-0.44539]	0.0270903	1
20	7434147	rs17399435	EIRA	risk	G	A	A	27	6	163	505	19	20	959	520	8.76[3.58-21.4]	1.50[0.60-3.72]	4.33[1.45-12.8]	Positive	0.44[0.11325-0.78177]	0.00868716	1	20	7434147	rs17399435	NARAC	non-risk	G	A	G	427	16	8	221	497	381	277	157	41.3[23.5-72.5]	1.04[0.42-2.54]	28.8[16.8-49.3]	Positive	0.30[0.10799-0.49606]	0.00228139	1
20	7435615	rs17399484	EIRA	risk	C	A	A	27	6	163	505	19	20	959	520	8.76[3.58-21.4]	1.50[0.60-3.72]	4.33[1.45-12.8]	Positive	0.44[0.11325-0.78177]	0.00868716	1	20	7435615	rs17399484	NARAC	non-risk	C	A	C	427	16	8	221	497	381	277	157	41.3[23.5-72.5]	1.04[0.42-2.54]	28.8[16.8-49.3]	Positive	0.30[0.10799-0.49606]	0.00228139	1
20	7434020	rs73602226	EIRA	risk	T	C	C	27	6	163	505	19	20	959	520	8.76[3.58-21.4]	1.50[0.60-3.72]	4.33[1.45-12.8]	Positive	0.44[0.11325-0.78177]	0.00868716	1	20	7434020	rs73602226	NARAC	non-risk	T	C	T	427	16	8	221	497	381	277	157	41.3[23.5-72.5]	1.04[0.42-2.54]	28.8[16.8-49.3]	Positive	0.30[0.10799-0.49606]	0.00228139	1
20	7434849	rs73602232	EIRA	risk	A	G	G	27	6	163	505	19	20	959	520	8.76[3.58-21.4]	1.50[0.60-3.72]	4.33[1.45-12.8]	Positive	0.44[0.11325-0.78177]	0.00868716	1	20	7434849	rs73602232	NARAC	non-risk	A	G	A	427	16	8	221	497	381	277	157	41.3[23.5-72.5]	1.04[0.42-2.54]	28.8[16.8-49.3]	Positive	0.30[0.10799-0.49606]	0.00228139	1
20	7435130	rs73602233	EIRA	risk	T	G	G	27	6	163	505	19	20	959	520	8.76[3.58-21.4]	1.50[0.60-3.72]	4.33[1.45-12.8]	Positive	0.44[0.11325-0.78177]	0.00868716	1	20	7435130	rs73602233	NARAC	non-risk	T	G	T	427	16	8	221	497	381	277	157	41.3[23.5-72.5]	1.04[0.42-2.54]	28.8[16.8-49.3]	Positive	0.30[0.10799-0.49606]	0.00228139	1
20	7438846	rs17399518	EIRA	risk	T	C	C	27	6	163	505	19	20	960	521	8.75[3.57-21.4]	1.50[0.60-3.72]	4.33[1.45-12.8]	Positive	0.44[0.11264-0.78160]	0.00879159	1	20	7438846	rs17399518	NARAC	non-risk	T	C	T	427	16	8	221	497	381	277	157	41.3[23.5-72.5]	1.04[0.42-2.54]	28.8[16.8-49.3]	Positive	0.30[0.10799-0.49606]	0.00228139	1
4	90212053	rs1079069	EIRA	non-risk	C	T	T	475	143	28	56	865	451	107	89	4.03[2.86-5.66]	1.59[0.97-2.62]	6.44[5.17-8.03]	Negative	-0.7[-1.3071--0.1880]	0.00882593	1	4	90212053	rs1079069	NARAC	non-risk	C	T	C	403	14	10	245	486	318	288	220	28.9[16.0-52.0]	1.22[0.52-2.86]	39.2[22.0-69.8]	Negative	-0.3[-0.7238--0.0020]	0.0487113	1
20	7438559	rs56138365	EIRA	risk	A	G	G	27	6	163	505	19	20	959	521	8.74[3.57-21.4]	1.50[0.60-3.72]	4.33[1.45-12.8]	Positive	0.44[0.11171-0.78141]	0.00895075	1	20	7438559	rs56138365	NARAC	non-risk	A	G	A	427	16	8	221	497	381	277	157	41.3[23.5-72.5]	1.04[0.42-2.54]	28.8[16.8-49.3]	Positive	0.30[0.10799-0.49606]	0.00228139	1
20	7434487	rs17308260	EIRA	risk	A	T	T	27	6	163	502	19	20	952	517	8.76[3.58-21.4]	1.51[0.61-3.75]	4.33[1.46-12.8]	Positive	0.44[0.11147-0.78053]	0.00897229	1	20	7434487	rs17308260	NARAC	non-risk	A	T	A	427	16	8	221	497	381	277	157	41.3[23.5-72.5]	1.04[0.42-2.54]	28.8[16.8-49.3]	Positive	0.30[0.10799-0.49606]	0.00228139	1
20	7430238	rs13038654	EIRA	risk	T	C	C	27	6	163	505	19	20	957	520	8.74[3.57-21.3]	1.50[0.60-3.72]	4.33[1.45-12.8]	Positive	0.44[0.11138-0.78135]	0.00900866	1	20	7430238	rs13038654	NARAC	non-risk	T	C	T	427	16	8	221	497	381	277	157	41.3[23.5-72.5]	1.04[0.42-2.54]	28.8[16.8-49.3]	Positive	0.30[0.10799-0.49606]	0.00228139	1
20	7430751	rs73600141	EIRA	risk	G	A	A	27	6	163	505	19	20	957	520	8.74[3.57-21.3]	1.50[0.60-3.72]	4.33[1.45-12.8]	Positive	0.44[0.11138-0.78135]	0.00900866	1	20	7430751	rs73600141	NARAC	non-risk	G	A	G	427	16	8	221	497	381	277	157	41.3[23.5-72.5]	1.04[0.42-2.54]	28.8[16.8-49.3]	Positive	0.30[0.10799-0.49606]	0.00228139	1
20	7430911	rs73602203	EIRA	risk	A	G	G	27	6	163	505	19	20	957	520	8.74[3.57-21.3]	1.50[0.60-3.72]	4.33[1.45-12.8]	Positive	0.44[0.11138-0.78135]	0.00900866	1	20	7430911	rs73602203	NARAC	non-risk	A	G	A	427	16	8	221	497	381	277	157	41.3[23.5-72.5]	1.04[0.42-2.54]	28.8[16.8-49.3]	Positive	0.30[0.10799-0.49606]	0.00228139	1
20	7431214	rs73602210	EIRA	risk	G	T	T	27	6	163	505	19	20	957	520	8.74[3.57-21.3]	1.50[0.60-3.72]	4.33[1.45-12.8]	Positive	0.44[0.11138-0.78135]	0.00900866	1	20	7431214	rs73602210	NARAC	non-risk	G	T	G	427	16	8	221	497	381	277	157	41.3[23.5-72.5]	1.04[0.42-2.54]	28.8[16.8-49.3]	Positive	0.30[0.10799-0.49606]	0.00228139	1
20	7432854	rs73602218	EIRA	risk	T	A	A	27	6	163	505	19	20	957	520	8.74[3.57-21.3]	1.50[0.60-3.72]	4.33[1.45-12.8]	Positive	0.44[0.11138-0.78135]	0.00900866	1	20	7432854	rs73602218	NARAC	non-risk	T	A	T	427	16	8	221	497	381	277	157	41.3[23.5-72.5]	1.04[0.42-2.54]	28.8[16.8-49.3]	Positive	0.30[0.10799-0.49606]	0.00228139	1
20	7433109	rs73602222	EIRA	risk	C	T	T	27	6	163	505	19	20	957	520	8.74[3.57-21.3]	1.50[0.60-3.72]	4.33[1.45-12.8]	Positive	0.44[0.11138-0.78135]	0.00900866	1	20	7433109	rs73602222	NARAC	non-risk	C	T	C	427	16	8	221	497	381	277	157	41.3[23.5-72.5]	1.04[0.42-2.54]	28.8[16.8-49.3]	Positive	0.30[0.10799-0.49606]	0.00228139	1
1	20965942	rs3121680	EIRA	non-risk	G	A	A	436	137	34	97	817	419	162	125	4.13[3.04-5.60]	1.13[0.73-1.75]	6.35[5.06-7.97]	Negative	-0.5[-0.9973--0.1420]	0.00902829	1	1	20965942	rs3121680	NARAC	risk	G	A	G	405	13	11	243	506	315	268	223	28.1[15.4-51.3]	1.41[0.60-3.30]	44.3[24.5-80.2]	Negative	-0.5[-1.0195--0.1661]	0.00646363	1
21	42616005	rs2837981	EIRA	risk	C	T	C	251	79	92	282	418	267	561	277	6.42[4.79-8.61]	1.00[0.70-1.41]	4.95[3.68-6.67]	Positive	0.22[0.05695-0.40101]	0.00908161	1	21	42616005	rs2837981	NARAC	risk	C	T	C	367	12	12	281	387	316	387	222	41.0[22.0-76.5]	1.20[0.52-2.78]	30.6[16.5-56.8]	Positive	0.24[0.05042-0.44486]	0.0138501	1
1	110969946	rs6687382	EIRA	non-risk	C	T	T	35	11	156	489	41	37	924	502	5.93[2.97-11.8]	1.00[0.49-2.03]	3.55[1.57-8.02]	Positive	0.39[0.09885-0.69907]	0.00917113	1	1	110969946	rs6687382	NARAC	risk	C	T	C	403	12	12	245	441	331	333	207	46.8[25.1-87.2]	1.59[0.68-3.71]	35.0[19.0-64.5]	Positive	0.23[0.03732-0.44093]	0.020204	1
1	153943079	rs12403956	EIRA	non-risk	G	A	A	51	16	154	475	87	69	889	469	6.02[3.39-10.6]	1.01[0.56-1.83]	4.04[2.11-7.70]	Positive	0.32[0.08095-0.57343]	0.00920377	1	1	153943079	rs12403956	NARAC	non-risk	G	A	A	584	18	6	64	702	504	72	34	63.2[32.3-123.]	2.42[0.88-6.63]	35.8[21.7-59.1]	Positive	0.41[0.12125-0.69992]	0.00541212	1
20	7439241	rs73602239	EIRA	risk	A	T	T	27	6	164	505	19	20	960	522	8.74[3.57-21.4]	1.51[0.61-3.75]	4.33[1.46-12.8]	Positive	0.44[0.11011-0.78017]	0.00920878	1	20	7439241	rs73602239	NARAC	non-risk	A	T	A	427	16	8	221	497	381	277	157	41.3[23.5-72.5]	1.04[0.42-2.54]	28.8[16.8-49.3]	Positive	0.30[0.10799-0.49606]	0.00228139	1
20	7439567	rs73602242	EIRA	risk	C	G	G	27	6	164	505	19	20	960	522	8.74[3.57-21.4]	1.51[0.61-3.75]	4.33[1.46-12.8]	Positive	0.44[0.11011-0.78017]	0.00920878	1	20	7439567	rs73602242	NARAC	non-risk	C	G	C	427	16	8	221	497	381	277	157	41.3[23.5-72.5]	1.04[0.42-2.54]	28.8[16.8-49.3]	Positive	0.30[0.10799-0.49606]	0.00228139	1
20	7439810	rs73602244	EIRA	risk	C	A	A	27	6	164	505	19	20	960	522	8.74[3.57-21.4]	1.51[0.61-3.75]	4.33[1.46-12.8]	Positive	0.44[0.11011-0.78017]	0.00920878	1	20	7439810	rs73602244	NARAC	non-risk	C	A	C	427	16	8	221	497	381	277	157	41.3[23.5-72.5]	1.04[0.42-2.54]	28.8[16.8-49.3]	Positive	0.30[0.10799-0.49606]	0.00228139	1
20	7440041	rs73602245	EIRA	risk	T	A	A	27	6	164	505	19	20	960	522	8.74[3.57-21.4]	1.51[0.61-3.75]	4.33[1.46-12.8]	Positive	0.44[0.11011-0.78017]	0.00920878	1	20	7440041	rs73602245	NARAC	non-risk	T	A	T	427	16	8	221	497	381	277	157	41.3[23.5-72.5]	1.04[0.42-2.54]	28.8[16.8-49.3]	Positive	0.30[0.10799-0.49606]	0.00228139	1
20	7440087	rs73602247	EIRA	risk	C	G	G	27	6	164	505	19	20	960	522	8.74[3.57-21.4]	1.51[0.61-3.75]	4.33[1.46-12.8]	Positive	0.44[0.11011-0.78017]	0.00920878	1	20	7440087	rs73602247	NARAC	non-risk	C	G	C	427	16	8	221	497	381	277	157	41.3[23.5-72.5]	1.04[0.42-2.54]	28.8[16.8-49.3]	Positive	0.30[0.10799-0.49606]	0.00228139	1
20	7440440	rs73602248	EIRA	risk	T	G	G	27	6	164	505	19	20	960	522	8.74[3.57-21.4]	1.51[0.61-3.75]	4.33[1.46-12.8]	Positive	0.44[0.11011-0.78017]	0.00920878	1	20	7440440	rs73602248	NARAC	non-risk	T	G	T	427	16	8	221	497	381	277	157	41.3[23.5-72.5]	1.04[0.42-2.54]	28.8[16.8-49.3]	Positive	0.30[0.10799-0.49606]	0.00228139	1
20	7441592	rs73602251	EIRA	risk	A	C	C	27	6	164	505	19	20	960	522	8.74[3.57-21.4]	1.51[0.61-3.75]	4.33[1.46-12.8]	Positive	0.44[0.11011-0.78017]	0.00920878	1	20	7441592	rs73602251	NARAC	non-risk	A	C	A	427	16	8	221	497	381	277	157	41.3[23.5-72.5]	1.04[0.42-2.54]	28.8[16.8-49.3]	Positive	0.30[0.10799-0.49606]	0.00228139	1
20	7437082	rs73602236	EIRA	risk	C	T	T	27	6	163	502	19	20	952	518	8.74[3.57-21.4]	1.51[0.61-3.75]	4.33[1.46-12.8]	Positive	0.44[0.10991-0.78017]	0.00924529	1	20	7437082	rs73602236	NARAC	non-risk	C	T	C	427	16	8	221	497	381	277	157	41.3[23.5-72.5]	1.04[0.42-2.54]	28.8[16.8-49.3]	Positive	0.30[0.10799-0.49606]	0.00228139	1
20	7431163	rs73602208	EIRA	risk	A	T	T	27	6	163	502	19	20	950	517	8.74[3.57-21.3]	1.51[0.61-3.75]	4.33[1.46-12.8]	Positive	0.44[0.10957-0.78011]	0.0093059	1	20	7431163	rs73602208	NARAC	non-risk	A	T	A	427	16	8	221	497	381	277	157	41.3[23.5-72.5]	1.04[0.42-2.54]	28.8[16.8-49.3]	Positive	0.30[0.10799-0.49606]	0.00228139	1
20	7432916	rs73602219	EIRA	risk	A	G	G	27	6	163	502	19	20	950	517	8.74[3.57-21.3]	1.51[0.61-3.75]	4.33[1.46-12.8]	Positive	0.44[0.10957-0.78011]	0.0093059	1	20	7432916	rs73602219	NARAC	non-risk	A	G	A	427	16	8	221	497	381	277	157	41.3[23.5-72.5]	1.04[0.42-2.54]	28.8[16.8-49.3]	Positive	0.30[0.10799-0.49606]	0.00228139	1
20	7432969	rs73602221	EIRA	risk	T	C	C	27	6	163	502	19	20	950	517	8.74[3.57-21.3]	1.51[0.61-3.75]	4.33[1.46-12.8]	Positive	0.44[0.10957-0.78011]	0.0093059	1	20	7432969	rs73602221	NARAC	non-risk	T	C	T	427	16	8	221	497	381	277	157	41.3[23.5-72.5]	1.04[0.42-2.54]	28.8[16.8-49.3]	Positive	0.30[0.10799-0.49606]	0.00228139	1
20	7439055	rs17308365	EIRA	risk	C	T	T	27	6	163	502	19	20	953	519	8.75[3.57-21.4]	1.51[0.61-3.75]	4.34[1.46-12.8]	Positive	0.44[0.10955-0.78004]	0.00930787	1	20	7439055	rs17308365	NARAC	non-risk	C	T	C	427	16	8	221	497	381	277	157	41.3[23.5-72.5]	1.04[0.42-2.54]	28.8[16.8-49.3]	Positive	0.30[0.10799-0.49606]	0.00228139	1
20	7439102	rs17308393	EIRA	risk	G	T	T	27	6	163	502	19	20	953	519	8.75[3.57-21.4]	1.51[0.61-3.75]	4.34[1.46-12.8]	Positive	0.44[0.10955-0.78004]	0.00930787	1	20	7439102	rs17308393	NARAC	non-risk	G	T	G	427	16	8	221	497	381	277	157	41.3[23.5-72.5]	1.04[0.42-2.54]	28.8[16.8-49.3]	Positive	0.30[0.10799-0.49606]	0.00228139	1
21	36817501	rs2205115	EIRA	risk	C	T	C	327	96	69	188	549	342	388	176	7.69[5.75-10.2]	1.26[0.88-1.81]	5.61[4.29-7.32]	Positive	0.23[0.05794-0.41354]	0.00935657	1	21	36817501	rs2205115	NARAC	non-risk	C	T	C	413	12	12	235	490	370	284	168	47.5[25.3-89.3]	1.62[0.69-3.77]	36.1[19.6-66.4]	Positive	0.22[0.01574-0.43859]	0.0352072	1
7	123926465	rs4145012	EIRA	risk	A	C	A	378	113	58	152	667	407	307	136	7.77[5.79-10.4]	1.28[0.88-1.86]	5.56[4.35-7.11]	Positive	0.24[0.06047-0.43363]	0.0094503	1	7	123926465	rs4145012	NARAC	non-risk	A	C	A	425	12	12	223	514	369	260	169	53.8[28.5-101.]	2.21[0.95-5.13]	40.6[22.1-74.8]	Positive	0.22[0.00785-0.43583]	0.0421612	1
3	171251343	rs260769	EIRA	risk	C	T	C	261	79	90	269	430	281	532	260	6.84[5.10-9.18]	1.11[0.78-1.58]	5.17[3.85-6.95]	Positive	0.22[0.05552-0.39821]	0.0094562	1	3	171251343	rs260769	NARAC	non-risk	C	T	C	319	11	13	329	343	256	431	282	39.9[20.9-76.0]	1.19[0.51-2.76]	30.3[15.9-57.8]	Positive	0.23[0.03535-0.43410]	0.0210256	1
7	123920784	rs41449045	EIRA	risk	C	T	C	377	113	57	151	667	406	307	136	7.76[5.78-10.4]	1.26[0.87-1.84]	5.57[4.36-7.12]	Positive	0.24[0.06038-0.43369]	0.00948392	1	7	123920784	rs41449045	NARAC	non-risk	C	T	C	425	12	12	223	514	369	260	169	53.8[28.5-101.]	2.21[0.95-5.13]	40.6[22.1-74.8]	Positive	0.22[0.00785-0.43583]	0.0421612	1
20	7439523	rs73602240	EIRA	risk	G	A	A	27	6	164	502	19	20	953	519	8.74[3.57-21.4]	1.52[0.61-3.77]	4.34[1.46-12.8]	Positive	0.44[0.10832-0.77892]	0.00950788	1	20	7439523	rs73602240	NARAC	non-risk	G	A	G	427	16	8	221	497	381	277	157	41.3[23.5-72.5]	1.04[0.42-2.54]	28.8[16.8-49.3]	Positive	0.30[0.10799-0.49606]	0.00228139	1
2	196045584	rs1397743	EIRA	non-risk	C	T	C	372	118	50	149	666	406	294	133	7.13[5.31-9.57]	1.07[0.73-1.57]	5.27[4.13-6.73]	Positive	0.25[0.06101-0.43912]	0.00952695	1	2	196045584	rs1397743	NARAC	non-risk	C	T	C	458	16	8	190	552	400	222	138	43.0[24.2-76.3]	1.18[0.48-2.89]	31.1[18.2-53.1]	Positive	0.27[0.05682-0.48872]	0.0132969	1
2	196045058	rs61664879	EIRA	non-risk	C	T	C	372	118	50	149	666	406	294	133	7.13[5.31-9.57]	1.07[0.73-1.57]	5.27[4.13-6.73]	Positive	0.25[0.06101-0.43912]	0.00952695	1	2	196045058	rs61664879	NARAC	non-risk	C	T	C	458	16	8	190	552	400	222	138	43.0[24.2-76.3]	1.18[0.48-2.89]	31.1[18.2-53.1]	Positive	0.27[0.05682-0.48872]	0.0132969	1
5	155375117	rs7716740	EIRA	non-risk	C	T	C	389	124	42	124	698	424	249	110	7.18[5.30-9.73]	1.04[0.69-1.57]	5.25[4.14-6.65]	Positive	0.26[0.06383-0.46009]	0.00955689	1	5	155375117	rs7716740	NARAC	non-risk	C	T	C	449	14	10	199	538	403	236	135	47.6[26.2-86.6]	1.49[0.63-3.51]	33.5[19.0-59.1]	Positive	0.28[0.07871-0.49257]	0.00681957	1
5	155374863	rs7711809	EIRA	non-risk	G	A	G	390	125	42	124	699	424	249	110	7.14[5.27-9.67]	1.04[0.69-1.56]	5.23[4.13-6.62]	Positive	0.26[0.06359-0.46004]	0.00963081	1	5	155374863	rs7711809	NARAC	non-risk	G	A	G	449	14	10	199	538	403	236	135	47.6[26.2-86.6]	1.49[0.63-3.51]	33.5[19.0-59.1]	Positive	0.28[0.07871-0.49257]	0.00681957	1
8	11450133	rs11995206	EIRA	non-risk	A	G	A	186	46	118	334	340	185	615	344	6.43[4.33-9.55]	1.25[0.81-1.93]	7.55[5.21-10.9]	Negative	-0.2[-0.3757--0.0518]	0.0096862	1	8	11450133	rs11995206	NARAC	risk	A	G	A	427	15	9	221	538	343	236	195	30.7[16.5-57.0]	1.30[0.53-3.20]	37.5[21.5-65.2]	Negative	-0.2[-0.4060--0.0532]	0.0107027	1
1	218248295	rs12134771	EIRA	non-risk	A	C	A	362	109	60	154	676	337	274	188	4.95[3.71-6.58]	1.31[0.90-1.89]	6.85[5.32-8.82]	Negative	-0.4[-0.7868--0.1072]	0.00992196	1	1	218248295	rs12134771	NARAC	non-risk	A	C	C	530	18	6	118	651	429	123	109	24.9[14.2-43.9]	1.54[0.58-4.09]	38.2[23.0-63.5]	Negative	-0.5[-1.0625--0.0455]	0.032714	1
1	20969690	rs879086	EIRA	non-risk	G	A	A	434	137	34	96	816	418	162	124	4.14[3.05-5.62]	1.14[0.73-1.76]	6.33[5.04-7.94]	Negative	-0.5[-0.9868--0.1344]	0.00992943	1	1	20969690	rs879086	NARAC	risk	G	A	G	405	13	11	243	506	315	268	223	28.1[15.4-51.3]	1.41[0.60-3.30]	44.3[24.5-80.2]	Negative	-0.5[-1.0195--0.1661]	0.00646363	1
5	155375281	rs11950822	EIRA	non-risk	C	T	C	390	125	42	123	699	424	247	109	7.14[5.27-9.68]	1.04[0.69-1.57]	5.23[4.13-6.62]	Positive	0.26[0.06167-0.45990]	0.0102557	1	5	155375281	rs11950822	NARAC	non-risk	C	T	C	449	14	10	199	538	403	236	135	47.6[26.2-86.6]	1.49[0.63-3.51]	33.5[19.0-59.1]	Positive	0.28[0.07871-0.49257]	0.00681957	1
15	39179446	rs55774654	EIRA	non-risk	T	C	T	438	138	33	95	813	472	166	69	8.01[5.68-11.2]	1.11[0.71-1.73]	5.55[4.43-6.94]	Positive	0.29[0.06924-0.51659]	0.0102638	1	15	39179446	rs55774654	NARAC	non-risk	T	C	T	546	18	6	102	639	464	135	74	50.4[28.0-90.6]	1.71[0.63-4.61]	33.6[20.3-55.7]	Positive	0.31[0.06937-0.56678]	0.0121852	1
15	39179436	rs55813105	EIRA	non-risk	T	C	T	438	138	33	95	813	472	166	69	8.01[5.68-11.2]	1.11[0.71-1.73]	5.55[4.43-6.94]	Positive	0.29[0.06924-0.51659]	0.0102638	1	15	39179436	rs55813105	NARAC	non-risk	T	C	T	546	18	6	102	639	464	135	74	50.4[28.0-90.6]	1.71[0.63-4.61]	33.6[20.3-55.7]	Positive	0.31[0.06937-0.56678]	0.0121852	1
15	39179518	rs56138388	EIRA	non-risk	T	A	T	438	138	33	95	813	472	166	69	8.01[5.68-11.2]	1.11[0.71-1.73]	5.55[4.43-6.94]	Positive	0.29[0.06924-0.51659]	0.0102638	1	15	39179518	rs56138388	NARAC	non-risk	T	A	T	546	18	6	102	639	464	135	74	50.4[28.0-90.6]	1.71[0.63-4.61]	33.6[20.3-55.7]	Positive	0.31[0.06937-0.56678]	0.0121852	1
10	8116503	rs9746	EIRA	non-risk	G	A	G	368	118	48	139	662	399	280	125	7.10[5.27-9.56]	1.06[0.71-1.57]	5.24[4.11-6.68]	Positive	0.25[0.05975-0.44605]	0.0102777	1	10	8116503	rs9746	NARAC	non-risk	G	A	G	481	15	9	167	558	403	216	135	50.6[28.1-91.1]	1.86[0.77-4.48]	35.5[20.5-61.5]	Positive	0.28[0.06713-0.49425]	0.00999183	1
8	10745469	rs10090444	EIRA	non-risk	C	G	G	124	45	124	405	219	126	749	412	6.11[4.05-9.22]	1.01[0.65-1.56]	4.84[3.22-7.28]	Positive	0.20[0.04835-0.36222]	0.0103499	1	8	10745469	rs10090444	NARAC	risk	C	G	C	454	17	7	194	576	383	198	155	39.2[21.2-72.5]	1.22[0.47-3.20]	32.2[19.1-54.3]	Positive	0.17[0.05341-0.29200]	0.0045466	1
2	18091547	rs4637119	EIRA	risk	T	C	T	349	106	58	166	603	367	340	153	7.38[5.51-9.88]	1.13[0.78-1.65]	5.47[4.24-7.06]	Positive	0.23[0.05634-0.42293]	0.0103907	1	2	18091547	rs4637119	NARAC	non-risk	T	C	T	474	16	8	174	541	393	233	145	44.6[25.2-78.7]	1.58[0.64-3.87]	33.8[19.8-57.7]	Positive	0.22[0.00356-0.45193]	0.0464658	1
1	20972340	rs3131714	EIRA	non-risk	G	A	A	430	136	34	96	800	410	162	124	4.15[3.05-5.63]	1.13[0.73-1.76]	6.32[5.03-7.95]	Negative	-0.5[-0.9834--0.1308]	0.0104122	1	1	20972340	rs3131714	NARAC	risk	G	A	G	405	13	11	243	506	315	268	223	28.1[15.4-51.3]	1.41[0.60-3.30]	44.3[24.5-80.2]	Negative	-0.5[-1.0195--0.1661]	0.00646363	1
9	73717140	rs918225	EIRA	risk	T	C	C	26	8	163	507	37	35	942	509	6.26[2.80-14.0]	1.07[0.47-2.43]	3.67[1.45-9.23]	Positive	0.40[0.09415-0.71017]	0.010494	1	9	73717140	rs918225	NARAC	non-risk	T	C	T	406	13	11	242	494	376	280	162	47.4[25.6-87.5]	1.62[0.69-3.77]	35.4[19.6-64.0]	Positive	0.23[0.03171-0.44655]	0.023841	1
1	153942156	rs12023699	EIRA	non-risk	A	G	G	51	16	155	482	87	69	892	474	5.98[3.36-10.6]	1.00[0.55-1.81]	4.04[2.11-7.71]	Positive	0.32[0.07562-0.57145]	0.0105308	1	1	153942156	rs12023699	NARAC	non-risk	A	G	G	584	18	6	64	702	504	72	34	63.2[32.3-123.]	2.42[0.88-6.63]	35.8[21.7-59.1]	Positive	0.41[0.12125-0.69992]	0.00541212	1
5	155374568	rs1368327	EIRA	non-risk	T	C	T	390	125	41	122	698	424	243	108	7.11[5.24-9.65]	1.03[0.68-1.55]	5.22[4.12-6.61]	Positive	0.26[0.06088-0.46100]	0.0105727	1	5	155374568	rs1368327	NARAC	non-risk	T	C	T	449	14	10	199	538	403	236	135	47.6[26.2-86.6]	1.49[0.63-3.51]	33.5[19.0-59.1]	Positive	0.28[0.07871-0.49257]	0.00681957	1
14	75911083	rs4903321	EIRA	non-risk	A	G	G	105	33	134	414	165	117	791	414	6.18[4.10-9.32]	1.02[0.66-1.59]	4.49[2.84-7.11]	Positive	0.26[0.06275-0.47511]	0.010573	1	14	75911083	rs4903321	NARAC	risk	A	G	A	234	7	17	414	232	194	542	344	41.3[18.8-90.4]	1.28[0.51-3.22]	32.1[14.4-71.3]	Positive	0.21[0.00085-0.42972]	0.0490874	1
2	196045183	rs1397744	EIRA	risk	T	C	T	327	101	70	206	579	358	400	186	7.12[5.35-9.47]	1.12[0.78-1.59]	5.36[4.12-6.96]	Positive	0.23[0.05363-0.40684]	0.0106102	1	2	196045183	rs1397744	NARAC	non-risk	T	C	T	404	13	11	244	469	345	305	193	44.8[24.3-82.4]	1.28[0.55-3.00]	31.5[17.4-56.8]	Positive	0.29[0.09828-0.48350]	0.00307448	1
2	196047323	rs57596719	EIRA	non-risk	T	C	T	372	118	50	149	666	406	293	133	7.11[5.30-9.54]	1.07[0.73-1.57]	5.27[4.13-6.73]	Positive	0.24[0.05755-0.43716]	0.0106397	1	2	196047323	rs57596719	NARAC	non-risk	T	C	T	456	16	8	192	554	404	220	134	43.3[24.4-76.9]	1.20[0.49-2.95]	31.3[18.3-53.5]	Positive	0.27[0.05592-0.48848]	0.013634	1
2	196047733	rs72613705	EIRA	non-risk	A	G	A	372	118	50	149	666	406	293	133	7.11[5.30-9.54]	1.07[0.73-1.57]	5.27[4.13-6.73]	Positive	0.24[0.05755-0.43716]	0.0106397	1	2	196047733	rs72613705	NARAC	non-risk	A	G	A	456	16	8	192	554	404	220	134	43.3[24.4-76.9]	1.20[0.49-2.95]	31.3[18.3-53.5]	Positive	0.27[0.05592-0.48848]	0.013634	1
13	55622576	rs7339300	EIRA	risk	A	G	A	249	70	96	269	414	269	540	260	7.53[5.54-10.2]	1.26[0.88-1.80]	5.58[4.10-7.60]	Positive	0.22[0.05104-0.39424]	0.0109899	1	13	55622576	rs7339300	NARAC	non-risk	A	G	A	279	9	15	369	326	252	448	286	41.1[20.2-83.3]	1.26[0.53-3.01]	32.3[15.8-65.7]	Positive	0.20[0.00081-0.41386]	0.0491023	1
16	53876444	rs7205009	EIRA	risk	T	C	C	468	148	21	56	867	454	93	84	3.60[2.53-5.12]	1.19[0.69-2.04]	6.14[4.93-7.64]	Negative	-0.7[-1.3430--0.1735]	0.0110336	1	16	53876444	rs7205009	NARAC	non-risk	T	C	T	442	14	10	206	544	358	230	180	28.4[15.7-51.2]	1.60[0.67-3.77]	44.0[24.8-77.9]	Negative	-0.5[-1.0023--0.1363]	0.0099642	1
16	80806218	rs9929786	EIRA	risk	C	T	C	440	136	29	76	781	449	175	70	8.46[6.01-11.8]	1.26[0.78-2.02]	5.74[4.57-7.20]	Positive	0.29[0.06638-0.51414]	0.0110463	1	16	80806218	rs9929786	NARAC	non-risk	C	T	C	521	16	8	127	643	469	131	69	54.4[29.5-100.]	2.21[0.89-5.49]	37.0[21.7-62.8]	Positive	0.29[0.04061-0.55653]	0.0232917	1
19	45971961	rs2282695	EIRA	non-risk	G	C	C	60	15	150	461	75	61	875	470	8.07[4.48-14.5]	1.39[0.76-2.54]	5.15[2.64-10.0]	Positive	0.31[0.07158-0.55525]	0.011081	1	19	45971961	rs2282695	NARAC	non-risk	G	C	G	315	11	13	333	345	254	429	284	37.7[19.7-71.9]	1.10[0.47-2.55]	29.7[15.5-56.7]	Positive	0.20[0.00435-0.41516]	0.0453297	1
1	153941514	rs11264743	EIRA	non-risk	T	C	C	51	16	155	482	87	69	892	475	5.96[3.36-10.5]	1.00[0.55-1.81]	4.04[2.11-7.71]	Positive	0.32[0.07335-0.57034]	0.01113	1	1	153941514	rs11264743	NARAC	non-risk	T	C	C	584	18	6	64	702	504	72	34	63.2[32.3-123.]	2.42[0.88-6.63]	35.8[21.7-59.1]	Positive	0.41[0.12125-0.69992]	0.00541212	1
2	196044235	rs1355429	EIRA	risk	T	C	T	337	102	68	189	598	370	371	170	7.40[5.54-9.88]	1.20[0.84-1.72]	5.47[4.22-7.09]	Positive	0.23[0.05269-0.41161]	0.011229	1	2	196044235	rs1355429	NARAC	non-risk	T	C	T	417	13	11	231	491	358	283	180	45.4[24.6-83.6]	1.41[0.60-3.28]	33.3[18.5-60.1]	Positive	0.25[0.05174-0.45977]	0.0140061	1
16	53867231	rs2111648	EIRA	risk	C	T	T	460	145	22	60	866	449	96	85	3.67[2.59-5.22]	1.17[0.69-1.98]	6.22[4.99-7.75]	Negative	-0.7[-1.3094--0.1675]	0.0112449	1	16	53867231	rs2111648	NARAC	non-risk	C	T	C	439	14	10	209	542	358	232	180	28.6[15.8-51.5]	1.57[0.66-3.71]	43.6[24.6-77.2]	Negative	-0.5[-0.9693--0.1185]	0.0121948	1
3	137193601	rs4267599	EIRA	risk	C	T	T	31	7	159	488	27	27	906	499	8.21[3.57-18.8]	1.44[0.62-3.35]	4.43[1.66-11.8]	Positive	0.40[0.09201-0.72053]	0.01128	1	3	137193601	rs4267599	NARAC	non-risk	C	T	C	421	14	10	227	488	358	286	180	39.6[21.9-71.4]	1.14[0.48-2.67]	30.9[17.4-54.7]	Positive	0.21[0.00040-0.42937]	0.0495638	1
3	65133040	rs9883021	EIRA	risk	C	T	C	178	52	115	349	274	185	697	354	6.95[4.96-9.73]	1.15[0.78-1.67]	5.18[3.60-7.45]	Positive	0.23[0.05284-0.41392]	0.0112849	1	3	65133040	rs9883021	NARAC	non-risk	T	C	T	470	17	7	178	577	424	197	114	40.3[22.9-70.9]	1.00[0.39-2.52]	29.9[17.7-50.3]	Positive	0.25[0.02956-0.48708]	0.026877	1
14	38090891	rs177829	EIRA	risk	A	G	G	97	30	141	436	153	112	826	432	6.25[4.07-9.58]	1.04[0.66-1.63]	4.51[2.80-7.28]	Positive	0.27[0.06104-0.48051]	0.0113913	1	14	38090891	rs177829	NARAC	risk	A	G	A	214	7	17	434	221	196	553	342	43.8[19.7-97.3]	1.34[0.53-3.40]	31.4[13.9-70.8]	Positive	0.27[0.07427-0.47404]	0.00718163	1
1	20968516	rs879089	EIRA	non-risk	C	T	T	434	137	34	96	815	418	162	123	4.18[3.08-5.67]	1.14[0.73-1.76]	6.32[5.03-7.93]	Negative	-0.5[-0.9687--0.1228]	0.0114228	1	1	20968516	rs879089	NARAC	risk	C	T	C	405	13	11	243	506	315	268	223	28.1[15.4-51.3]	1.41[0.60-3.30]	44.3[24.5-80.2]	Negative	-0.5[-1.0195--0.1661]	0.00646363	1
5	155066776	rs4585515	EIRA	non-risk	G	A	A	29	8	163	504	37	32	942	512	7.03[3.17-15.5]	1.21[0.54-2.71]	4.04[1.61-10.1]	Positive	0.39[0.08874-0.70023]	0.011442	1	5	155066776	rs4585515	NARAC	non-risk	G	A	G	424	13	11	224	466	344	308	194	48.5[26.4-89.1]	1.91[0.82-4.45]	37.4[20.7-67.5]	Positive	0.21[0.00195-0.42048]	0.0478931	1
16	53867117	rs2111649	EIRA	risk	C	T	T	459	146	22	60	866	449	96	85	3.64[2.57-5.17]	1.16[0.68-1.97]	6.16[4.94-7.68]	Negative	-0.7[-1.3056--0.1652]	0.0114676	1	16	53867117	rs2111649	NARAC	non-risk	C	T	C	439	14	10	209	542	358	232	180	28.6[15.8-51.5]	1.57[0.66-3.71]	43.6[24.6-77.2]	Negative	-0.5[-0.9693--0.1185]	0.0121948	1
3	8089838	rs73022737	EIRA	non-risk	C	G	G	58	17	148	467	82	65	867	464	6.51[3.74-11.3]	1.08[0.61-1.93]	4.34[2.30-8.19]	Positive	0.31[0.07174-0.56755]	0.0114965	1	3	8089838	rs73022737	NARAC	non-risk	C	G	C	278	10	14	370	321	242	453	296	39.3[20.0-77.0]	1.15[0.49-2.71]	30.0[15.2-59.0]	Positive	0.23[0.03112-0.43329]	0.0236121	1
16	53872587	rs61222151	EIRA	risk	A	G	G	448	137	22	61	828	426	103	89	3.89[2.75-5.49]	1.19[0.70-2.02]	6.43[5.13-8.07]	Negative	-0.7[-1.2541--0.1583]	0.0115247	1	16	53872587	rs61222151	NARAC	non-risk	A	G	A	445	14	10	203	548	362	226	176	28.7[15.9-51.8]	1.62[0.68-3.82]	43.8[24.8-77.6]	Negative	-0.5[-0.9751--0.1189]	0.0122595	1
16	53866767	rs62033429	EIRA	risk	C	T	T	459	146	22	60	865	449	96	85	3.64[2.57-5.17]	1.16[0.68-1.96]	6.15[4.94-7.67]	Negative	-0.7[-1.3037--0.1641]	0.0115753	1	16	53866767	rs62033429	NARAC	non-risk	C	T	C	439	14	10	209	543	358	231	180	28.5[15.8-51.4]	1.57[0.66-3.71]	43.6[24.6-77.3]	Negative	-0.5[-0.9747--0.1215]	0.0117826	1
1	153937746	rs11264734	EIRA	non-risk	C	T	T	49	15	152	473	82	66	876	470	6.05[3.35-10.9]	1.02[0.55-1.88]	4.06[2.08-7.89]	Positive	0.32[0.07254-0.57690]	0.0116089	1	1	153937746	rs11264734	NARAC	non-risk	C	T	T	584	18	6	64	704	504	70	34	61.1[31.2-119.]	2.42[0.88-6.63]	35.9[21.8-59.3]	Positive	0.38[0.08612-0.69063]	0.0117849	1
1	153943800	rs6666703	EIRA	non-risk	T	C	C	51	16	154	474	87	68	885	465	6.04[3.40-10.7]	1.01[0.56-1.83]	4.09[2.14-7.81]	Positive	0.32[0.07132-0.56937]	0.0116902	1	1	153943800	rs6666703	NARAC	non-risk	T	C	C	584	18	6	64	702	504	72	34	63.2[32.3-123.]	2.42[0.88-6.63]	35.8[21.7-59.1]	Positive	0.41[0.12125-0.69992]	0.00541212	1
21	36817639	rs2205114	EIRA	risk	A	G	A	327	96	69	188	550	342	386	176	7.65[5.72-10.2]	1.26[0.88-1.81]	5.62[4.30-7.34]	Positive	0.23[0.05118-0.40940]	0.0117333	1	21	36817639	rs2205114	NARAC	non-risk	A	G	A	413	12	12	235	490	370	284	168	47.5[25.3-89.3]	1.62[0.69-3.77]	36.1[19.6-66.4]	Positive	0.22[0.01574-0.43859]	0.0352072	1
2	196042509	rs13415177	EIRA	non-risk	G	A	G	367	118	49	144	652	403	286	132	6.90[5.14-9.28]	1.07[0.72-1.57]	5.13[4.02-6.55]	Positive	0.24[0.05472-0.43833]	0.0117623	1	2	196042509	rs13415177	NARAC	non-risk	G	A	G	458	16	8	190	552	400	222	138	43.0[24.2-76.3]	1.18[0.48-2.89]	31.1[18.2-53.1]	Positive	0.27[0.05682-0.48872]	0.0132969	1
2	196049787	rs55726621	EIRA	risk	T	C	T	372	117	50	143	665	405	284	128	7.22[5.36-9.72]	1.12[0.76-1.64]	5.31[4.16-6.78]	Positive	0.24[0.05451-0.43911]	0.0118826	1	2	196049787	rs55726621	NARAC	non-risk	T	C	T	456	16	8	192	554	404	220	134	43.3[24.4-76.9]	1.20[0.49-2.95]	31.3[18.3-53.5]	Positive	0.27[0.05592-0.48848]	0.013634	1
7	111440088	rs2097713	EIRA	risk	A	T	A	360	102	65	154	636	395	309	136	8.14[6.03-10.9]	1.46[1.01-2.10]	5.72[4.43-7.38]	Positive	0.24[0.05309-0.42854]	0.0119234	1	7	111440088	rs2097713	NARAC	non-risk	A	T	A	443	14	10	205	526	399	248	139	46.4[25.5-84.4]	1.40[0.59-3.30]	33.0[18.7-58.2]	Positive	0.27[0.07265-0.48707]	0.00811426	1
5	5931513	rs16876615	EIRA	non-risk	A	G	G	22	7	156	496	30	29	901	501	6.04[2.55-14.3]	1.03[0.43-2.48]	3.43[1.26-9.30]	Positive	0.42[0.09346-0.75653]	0.011986	1	5	5931513	rs16876615	NARAC	risk	A	G	A	453	17	7	195	521	394	253	144	42.0[24.1-73.3]	1.04[0.41-2.63]	29.1[17.2-49.3]	Positive	0.30[0.10867-0.50135]	0.00232791	1
2	196000471	rs777738	EIRA	risk	C	T	C	342	103	68	191	606	373	373	171	7.41[5.56-9.88]	1.19[0.84-1.71]	5.51[4.25-7.13]	Positive	0.22[0.05050-0.40894]	0.0119946	1	2	196000471	rs777738	NARAC	non-risk	C	T	C	421	13	11	227	493	359	281	179	45.3[24.6-83.6]	1.45[0.62-3.38]	33.9[18.8-61.1]	Positive	0.24[0.03551-0.45017]	0.021691	1
13	75870313	rs2328938	EIRA	risk	T	G	T	179	51	113	327	297	201	648	324	7.29[5.18-10.2]	1.25[0.85-1.83]	5.37[3.74-7.72]	Positive	0.22[0.05005-0.40601]	0.0120331	1	13	75870313	rs2328938	NARAC	non-risk	T	G	T	229	6	18	419	261	217	513	321	51.7[22.1-120.]	1.72[0.65-4.51]	39.5[16.8-93.2]	Positive	0.22[0.01370-0.42684]	0.0366107	1
16	53867597	rs7196017	EIRA	risk	C	T	T	450	143	22	60	852	438	100	87	3.73[2.64-5.28]	1.16[0.68-1.97]	6.23[4.98-7.78]	Negative	-0.7[-1.2683--0.1560]	0.0120786	1	16	53867597	rs7196017	NARAC	non-risk	C	T	C	442	14	10	206	546	362	228	176	28.9[16.0-52.2]	1.59[0.67-3.76]	43.4[24.5-76.9]	Negative	-0.5[-0.9423--0.1013]	0.0149902	1
16	53875484	rs8053367	EIRA	risk	T	G	G	469	148	22	59	876	458	96	85	3.67[2.59-5.21]	1.19[0.70-2.01]	6.15[4.94-7.65]	Negative	-0.7[-1.2929--0.1587]	0.0121235	1	16	53875484	rs8053367	NARAC	non-risk	T	G	T	442	14	10	206	544	358	230	180	28.4[15.7-51.2]	1.60[0.67-3.77]	44.0[24.8-77.9]	Negative	-0.5[-1.0023--0.1363]	0.0099642	1
16	53875712	rs8053740	EIRA	risk	C	G	G	469	148	22	59	876	458	96	85	3.67[2.59-5.21]	1.19[0.70-2.01]	6.15[4.94-7.65]	Negative	-0.7[-1.2929--0.1587]	0.0121235	1	16	53875712	rs8053740	NARAC	non-risk	C	G	C	442	14	10	206	544	358	230	180	28.4[15.7-51.2]	1.60[0.67-3.77]	44.0[24.8-77.9]	Negative	-0.5[-1.0023--0.1363]	0.0099642	1
16	53875604	rs8055453	EIRA	risk	C	A	A	469	148	22	59	876	458	96	85	3.67[2.59-5.21]	1.19[0.70-2.01]	6.15[4.94-7.65]	Negative	-0.7[-1.2929--0.1587]	0.0121235	1	16	53875604	rs8055453	NARAC	non-risk	C	A	C	442	14	10	206	544	358	230	180	28.4[15.7-51.2]	1.60[0.67-3.77]	44.0[24.8-77.9]	Negative	-0.5[-1.0023--0.1363]	0.0099642	1
16	53875675	rs8055484	EIRA	risk	G	A	A	469	148	22	59	876	458	96	85	3.67[2.59-5.21]	1.19[0.70-2.01]	6.15[4.94-7.65]	Negative	-0.7[-1.2929--0.1587]	0.0121235	1	16	53875675	rs8055484	NARAC	non-risk	G	A	G	442	14	10	206	544	358	230	180	28.4[15.7-51.2]	1.60[0.67-3.77]	44.0[24.8-77.9]	Negative	-0.5[-1.0023--0.1363]	0.0099642	1
2	196005511	rs12611834	EIRA	risk	G	T	G	338	103	68	188	600	372	369	170	7.29[5.46-9.73]	1.20[0.84-1.72]	5.41[4.17-7.00]	Positive	0.23[0.05027-0.41014]	0.0121536	1	2	196005511	rs12611834	NARAC	non-risk	G	T	G	420	13	11	228	493	359	281	179	45.1[24.5-83.2]	1.43[0.61-3.33]	33.7[18.7-60.8]	Positive	0.24[0.03588-0.45050]	0.0214896	1
2	196011944	rs2130344	EIRA	risk	C	A	C	338	103	68	188	600	372	369	170	7.29[5.46-9.73]	1.20[0.84-1.72]	5.41[4.17-7.00]	Positive	0.23[0.05027-0.41014]	0.0121536	1	2	196011944	rs2130344	NARAC	non-risk	C	A	C	418	13	11	230	492	358	282	180	44.8[24.3-82.6]	1.41[0.60-3.29]	33.5[18.6-60.5]	Positive	0.24[0.03508-0.44999]	0.021937	1
2	196009973	rs6711316	EIRA	risk	T	C	T	338	103	68	188	600	372	369	170	7.29[5.46-9.73]	1.20[0.84-1.72]	5.41[4.17-7.00]	Positive	0.23[0.05027-0.41014]	0.0121536	1	2	196009973	rs6711316	NARAC	non-risk	T	C	T	420	13	11	228	493	359	281	179	45.1[24.5-83.2]	1.43[0.61-3.33]	33.7[18.7-60.8]	Positive	0.24[0.03588-0.45050]	0.0214896	1
2	196014582	rs7558444	EIRA	risk	T	C	T	338	103	68	188	600	372	369	170	7.29[5.46-9.73]	1.20[0.84-1.72]	5.41[4.17-7.00]	Positive	0.23[0.05027-0.41014]	0.0121536	1	2	196014582	rs7558444	NARAC	non-risk	T	C	T	418	13	11	230	492	358	282	180	44.8[24.3-82.6]	1.41[0.60-3.29]	33.5[18.6-60.5]	Positive	0.24[0.03508-0.44999]	0.021937	1
2	196014587	rs7597587	EIRA	risk	G	A	G	338	103	68	188	600	372	369	170	7.29[5.46-9.73]	1.20[0.84-1.72]	5.41[4.17-7.00]	Positive	0.23[0.05027-0.41014]	0.0121536	1	2	196014587	rs7597587	NARAC	non-risk	G	A	G	418	13	11	230	492	358	282	180	44.8[24.3-82.6]	1.41[0.60-3.29]	33.5[18.6-60.5]	Positive	0.24[0.03508-0.44999]	0.021937	1
19	46929591	rs10412620	EIRA	non-risk	C	A	C	171	36	135	362	313	145	666	399	8.06[5.49-11.8]	1.77[1.17-2.68]	10.6[7.02-16.0]	Negative	-0.4[-0.7387--0.0901]	0.0122622	1	19	46929591	rs10412620	NARAC	non-risk	C	A	C	478	11	13	170	572	350	202	188	39.5[20.5-75.8]	3.86[1.64-9.05]	61.8[32.8-116.]	Negative	-0.6[-1.0940--0.1822]	0.00607914	1
1	218157797	rs12028969	EIRA	non-risk	T	C	C	483	146	23	47	877	465	86	72	3.86[2.68-5.57]	1.62[0.95-2.78]	6.40[5.14-7.97]	Negative	-0.8[-1.4601--0.1779]	0.0122792	1	1	218157797	rs12028969	NARAC	non-risk	T	C	T	374	11	13	274	444	263	330	275	34.1[17.9-64.9]	1.66[0.71-3.86]	48.1[25.3-91.5]	Negative	-0.4[-0.8020--0.0590]	0.0231232	1
16	53876002	rs7197885	EIRA	risk	T	A	A	469	148	22	59	875	458	96	85	3.67[2.59-5.21]	1.19[0.70-2.01]	6.14[4.94-7.64]	Negative	-0.7[-1.2900--0.1571]	0.0122907	1	16	53876002	rs7197885	NARAC	non-risk	T	A	T	442	14	10	206	544	358	230	180	28.4[15.7-51.2]	1.60[0.67-3.77]	44.0[24.8-77.9]	Negative	-0.5[-1.0023--0.1363]	0.0099642	1
2	196050361	rs1858300	EIRA	risk	A	G	A	338	101	67	190	599	372	368	170	7.42[5.55-9.91]	1.20[0.83-1.71]	5.51[4.25-7.15]	Positive	0.22[0.04990-0.40978]	0.0122928	1	2	196050361	rs1858300	NARAC	non-risk	A	G	A	415	13	11	233	494	362	280	176	45.7[24.7-84.2]	1.43[0.61-3.35]	33.7[18.7-60.7]	Positive	0.25[0.04802-0.45761]	0.0155359	1
16	53869888	rs2111647	EIRA	risk	C	T	T	447	143	21	59	846	430	96	84	3.69[2.60-5.25]	1.12[0.66-1.92]	6.25[5.00-7.81]	Negative	-0.7[-1.2967--0.1578]	0.0123093	1	16	53869888	rs2111647	NARAC	non-risk	C	T	C	445	14	10	203	548	362	226	176	28.7[15.9-51.8]	1.62[0.68-3.82]	43.8[24.8-77.6]	Negative	-0.5[-0.9751--0.1189]	0.0122595	1
5	155374658	rs1368328	EIRA	non-risk	T	C	T	390	125	42	124	699	424	247	110	7.08[5.23-9.59]	1.04[0.69-1.56]	5.23[4.13-6.62]	Positive	0.25[0.05524-0.45545]	0.0123789	1	5	155374658	rs1368328	NARAC	non-risk	T	C	T	449	14	10	199	538	403	236	135	47.6[26.2-86.6]	1.49[0.63-3.51]	33.5[19.0-59.1]	Positive	0.28[0.07871-0.49257]	0.00681957	1
5	155374745	rs1368329	EIRA	non-risk	T	C	T	390	125	42	124	699	424	247	110	7.08[5.23-9.59]	1.04[0.69-1.56]	5.23[4.13-6.62]	Positive	0.25[0.05524-0.45545]	0.0123789	1	5	155374745	rs1368329	NARAC	non-risk	T	C	T	449	14	10	199	538	403	236	135	47.6[26.2-86.6]	1.49[0.63-3.51]	33.5[19.0-59.1]	Positive	0.28[0.07871-0.49257]	0.00681957	1
5	155374801	rs1368330	EIRA	non-risk	G	A	G	390	125	42	124	699	424	247	110	7.08[5.23-9.59]	1.04[0.69-1.56]	5.23[4.13-6.62]	Positive	0.25[0.05524-0.45545]	0.0123789	1	5	155374801	rs1368330	NARAC	non-risk	G	A	G	449	14	10	199	538	403	236	135	47.6[26.2-86.6]	1.49[0.63-3.51]	33.5[19.0-59.1]	Positive	0.28[0.07871-0.49257]	0.00681957	1
16	53876149	rs7203051	EIRA	risk	C	G	G	469	148	22	59	874	458	96	85	3.67[2.59-5.21]	1.19[0.70-2.01]	6.14[4.93-7.63]	Negative	-0.7[-1.2876--0.1558]	0.0124296	1	16	53876149	rs7203051	NARAC	non-risk	C	G	C	442	14	10	206	544	358	230	180	28.4[15.7-51.2]	1.60[0.67-3.77]	44.0[24.8-77.9]	Negative	-0.5[-1.0023--0.1363]	0.0099642	1
5	178999677	rs7706115	EIRA	non-risk	C	G	G	69	21	144	441	122	91	818	430	6.26[3.78-10.3]	1.05[0.62-1.77]	4.40[2.51-7.72]	Positive	0.28[0.06201-0.51362]	0.0124782	1	5	178999677	rs7706115	NARAC	risk	C	G	C	258	9	15	390	282	239	492	299	38.6[19.0-78.2]	1.09[0.46-2.60]	28.0[13.7-57.2]	Positive	0.27[0.07889-0.46357]	0.00570955	1
16	25477714	rs9935555	EIRA	non-risk	T	C	T	186	59	110	343	353	225	623	313	6.48[4.68-8.98]	1.02[0.71-1.47]	4.99[3.56-7.01]	Positive	0.22[0.04842-0.40341]	0.0126036	1	16	25477714	rs9935555	NARAC	risk	T	C	T	251	7	17	397	242	219	532	319	43.0[19.6-94.2]	1.26[0.50-3.16]	29.4[13.2-65.3]	Positive	0.30[0.12286-0.49579]	0.00114822	1
16	25477136	rs9937520	EIRA	non-risk	C	A	C	186	59	110	343	353	225	623	313	6.48[4.68-8.98]	1.02[0.71-1.47]	4.99[3.56-7.01]	Positive	0.22[0.04842-0.40341]	0.0126036	1	16	25477136	rs9937520	NARAC	risk	C	A	C	250	7	17	398	242	219	532	319	42.9[19.6-94.2]	1.26[0.50-3.16]	29.4[13.2-65.2]	Positive	0.30[0.12285-0.49584]	0.00114915	1
14	39972141	rs12896408	EIRA	non-risk	G	A	G	355	108	62	178	637	385	341	156	7.31[5.48-9.76]	1.12[0.78-1.62]	5.48[4.26-7.04]	Positive	0.23[0.04998-0.41677]	0.0126234	1	14	39972141	rs12896408	NARAC	non-risk	G	A	G	433	12	12	215	488	377	286	161	54.6[29.0-102.]	1.89[0.81-4.40]	36.8[20.0-67.7]	Positive	0.30[0.11693-0.50080]	0.00161001	1
14	39971633	rs4902720	EIRA	non-risk	T	C	T	355	108	62	178	637	385	341	156	7.31[5.48-9.76]	1.12[0.78-1.62]	5.48[4.26-7.04]	Positive	0.23[0.04998-0.41677]	0.0126234	1	14	39971633	rs4902720	NARAC	non-risk	T	C	T	433	12	12	215	488	377	286	161	54.6[29.0-102.]	1.89[0.81-4.40]	36.8[20.0-67.7]	Positive	0.30[0.11693-0.50080]	0.00161001	1
2	196021925	rs2171814	EIRA	risk	A	G	A	323	99	63	197	570	352	379	178	7.07[5.30-9.45]	1.05[0.73-1.52]	5.39[4.14-7.02]	Positive	0.22[0.04895-0.40951]	0.0126942	1	2	196021925	rs2171814	NARAC	non-risk	A	G	A	405	13	11	243	470	345	304	193	44.5[24.2-81.9]	1.30[0.56-3.04]	31.8[17.6-57.5]	Positive	0.27[0.08260-0.47377]	0.00530682	1
15	39179357	rs17660736	EIRA	non-risk	C	T	C	438	138	33	95	813	474	166	70	7.90[5.61-11.1]	1.11[0.71-1.73]	5.52[4.41-6.91]	Positive	0.28[0.06091-0.51091]	0.0127495	1	15	39179357	rs17660736	NARAC	non-risk	C	T	C	546	18	6	102	639	464	135	74	50.4[28.0-90.6]	1.71[0.63-4.61]	33.6[20.3-55.7]	Positive	0.31[0.06937-0.56678]	0.0121852	1
6	7037738	rs10458103	EIRA	non-risk	G	A	G	328	97	65	182	607	298	325	216	5.09[3.82-6.79]	1.19[0.82-1.71]	6.96[5.33-9.09]	Negative	-0.4[-0.7240--0.0860]	0.0128203	1	6	7037738	rs10458103	NARAC	non-risk	G	A	A	529	16	8	119	661	432	113	106	29.2[16.1-53.0]	2.52[1.02-6.24]	43.0[25.2-73.2]	Negative	-0.5[-1.0328--0.0097]	0.0457747	1
18	43239581	rs1484876	EIRA	risk	T	G	T	388	120	47	139	664	396	305	137	7.39[5.53-9.87]	1.09[0.74-1.61]	5.50[4.32-7.01]	Positive	0.24[0.05128-0.43188]	0.0128392	1	18	43239581	rs1484876	NARAC	risk	T	G	T	452	14	10	196	528	396	246	142	48.0[26.4-87.3]	1.79[0.75-4.22]	36.2[20.5-63.7]	Positive	0.23[0.01099-0.45079]	0.0395899	1
2	196043754	rs72613703	EIRA	non-risk	C	T	C	371	118	48	141	665	406	273	124	7.09[5.26-9.57]	1.08[0.73-1.60]	5.25[4.12-6.70]	Positive	0.24[0.05243-0.44197]	0.0128575	1	2	196043754	rs72613703	NARAC	non-risk	C	T	C	462	16	8	186	554	403	220	135	43.9[24.7-77.9]	1.22[0.49-2.99]	31.3[18.3-53.5]	Positive	0.28[0.06585-0.49554]	0.0104423	1
2	196043767	rs72613704	EIRA	non-risk	T	C	T	371	118	48	141	665	406	273	124	7.09[5.26-9.57]	1.08[0.73-1.60]	5.25[4.12-6.70]	Positive	0.24[0.05243-0.44197]	0.0128575	1	2	196043767	rs72613704	NARAC	non-risk	T	C	T	458	16	8	190	552	400	222	138	43.0[24.2-76.3]	1.18[0.48-2.89]	31.1[18.2-53.1]	Positive	0.27[0.05682-0.48872]	0.0132969	1
2	196018369	rs6736088	EIRA	non-risk	A	G	A	338	103	55	178	603	373	328	154	7.14[5.32-9.59]	1.02[0.70-1.49]	5.43[4.19-7.03]	Positive	0.23[0.05008-0.42211]	0.0128577	1	2	196018369	rs6736088	NARAC	non-risk	A	G	A	418	13	11	230	492	358	282	180	44.8[24.3-82.6]	1.41[0.60-3.29]	33.5[18.6-60.5]	Positive	0.24[0.03508-0.44999]	0.021937	1
16	53876862	rs7204450	EIRA	risk	C	G	G	465	146	22	53	858	454	94	83	3.71[2.61-5.28]	1.33[0.78-2.27]	6.12[4.91-7.62]	Negative	-0.7[-1.3184--0.1562]	0.0128745	1	16	53876862	rs7204450	NARAC	non-risk	C	G	C	442	14	10	206	546	360	228	178	28.7[15.9-51.9]	1.59[0.67-3.77]	43.6[24.6-77.2]	Negative	-0.5[-0.9616--0.1122]	0.0132152	1
16	25475192	rs2106371	EIRA	non-risk	G	A	G	187	59	110	343	353	225	623	313	6.51[4.70-9.01]	1.02[0.71-1.47]	5.02[3.57-7.04]	Positive	0.22[0.04758-0.40252]	0.0129344	1	16	25475192	rs2106371	NARAC	risk	G	A	G	250	7	17	398	242	219	532	319	42.9[19.6-94.2]	1.26[0.50-3.16]	29.4[13.2-65.2]	Positive	0.30[0.12285-0.49584]	0.00114915	1
16	25488544	rs8062148	EIRA	non-risk	C	T	C	185	59	111	346	350	224	623	314	6.41[4.63-8.88]	1.01[0.70-1.46]	4.95[3.52-6.95]	Positive	0.22[0.04764-0.40370]	0.0129727	1	16	25488544	rs8062148	NARAC	risk	C	T	C	250	7	17	398	243	218	531	320	42.6[19.4-93.5]	1.26[0.50-3.15]	29.6[13.3-65.8]	Positive	0.29[0.10955-0.48823]	0.00197462	1
16	53874401	rs6499651	EIRA	risk	T	C	C	464	145	23	61	860	445	103	88	3.84[2.72-5.42]	1.21[0.72-2.04]	6.27[5.03-7.81]	Negative	-0.6[-1.2295--0.1444]	0.0130676	1	16	53874401	rs6499651	NARAC	non-risk	T	C	T	445	14	10	203	548	362	226	176	28.7[15.9-51.8]	1.62[0.68-3.82]	43.8[24.8-77.6]	Negative	-0.5[-0.9751--0.1189]	0.0122595	1
2	196043600	rs12614871	EIRA	risk	C	T	C	338	102	68	188	599	372	368	170	7.35[5.50-9.81]	1.21[0.85-1.73]	5.45[4.21-7.06]	Positive	0.22[0.04801-0.40865]	0.0130699	1	2	196043600	rs12614871	NARAC	non-risk	C	T	C	417	13	11	231	491	358	283	180	45.4[24.6-83.6]	1.41[0.60-3.28]	33.3[18.5-60.1]	Positive	0.25[0.05174-0.45977]	0.0140061	1
2	196042953	rs7423586	EIRA	risk	T	C	T	338	102	68	188	599	372	368	170	7.35[5.50-9.81]	1.21[0.85-1.73]	5.45[4.21-7.06]	Positive	0.22[0.04801-0.40865]	0.0130699	1	2	196042953	rs7423586	NARAC	non-risk	T	C	T	417	13	11	231	491	358	283	180	45.4[24.6-83.6]	1.41[0.60-3.28]	33.3[18.5-60.1]	Positive	0.25[0.05174-0.45977]	0.0140061	1
2	196036929	rs1397745	EIRA	non-risk	G	T	G	359	118	50	143	653	398	285	130	6.83[5.08-9.19]	1.07[0.73-1.58]	5.08[3.98-6.49]	Positive	0.24[0.05142-0.43777]	0.0130726	1	2	196036929	rs1397745	NARAC	non-risk	G	T	G	458	16	8	190	552	400	222	138	43.0[24.2-76.3]	1.18[0.48-2.89]	31.1[18.2-53.1]	Positive	0.27[0.05682-0.48872]	0.0132969	1
19	46932062	rs427250	EIRA	non-risk	A	G	A	199	46	118	310	384	180	573	346	7.26[5.12-10.3]	1.64[1.11-2.41]	9.43[6.52-13.6]	Negative	-0.3[-0.6932--0.0812]	0.0131173	1	19	46932062	rs427250	NARAC	non-risk	A	G	A	422	10	14	226	504	307	270	231	43.1[22.0-84.5]	2.99[1.27-7.03]	60.0[30.9-116.]	Negative	-0.4[-0.8168--0.0601]	0.0231071	1
9	73696694	rs7873024	EIRA	risk	T	C	C	26	7	163	503	37	35	934	503	7.16[3.07-16.7]	1.23[0.52-2.91]	4.18[1.60-10.9]	Positive	0.38[0.08043-0.68723]	0.0131522	1	9	73696694	rs7873024	NARAC	non-risk	T	C	T	404	13	11	244	492	377	282	161	48.4[26.2-89.5]	1.64[0.70-3.82]	35.3[19.5-63.8]	Positive	0.25[0.05518-0.45948]	0.0125934	1
2	196034083	rs7593213	EIRA	risk	T	G	T	337	102	68	187	595	370	368	170	7.32[5.48-9.78]	1.22[0.85-1.74]	5.43[4.19-7.04]	Positive	0.22[0.04778-0.40887]	0.013183	1	2	196034083	rs7593213	NARAC	non-risk	T	G	T	417	13	11	231	491	358	283	180	45.4[24.6-83.6]	1.41[0.60-3.28]	33.3[18.5-60.1]	Positive	0.25[0.05174-0.45977]	0.0140061	1
2	196027829	rs1397746	EIRA	risk	C	A	C	338	102	68	188	599	372	368	170	7.35[5.50-9.81]	1.21[0.85-1.73]	5.45[4.21-7.07]	Positive	0.22[0.04767-0.40845]	0.0132138	1	2	196027829	rs1397746	NARAC	non-risk	C	A	C	417	13	11	231	491	358	283	180	45.4[24.6-83.6]	1.41[0.60-3.28]	33.3[18.5-60.1]	Positive	0.25[0.05174-0.45977]	0.0140061	1
2	196033450	rs2889032	EIRA	risk	G	T	G	338	102	68	188	599	372	368	170	7.35[5.50-9.81]	1.21[0.85-1.73]	5.45[4.21-7.07]	Positive	0.22[0.04767-0.40845]	0.0132138	1	2	196033450	rs2889032	NARAC	non-risk	G	T	G	417	13	11	231	491	358	283	180	45.4[24.6-83.6]	1.41[0.60-3.28]	33.3[18.5-60.1]	Positive	0.25[0.05174-0.45977]	0.0140061	1
2	196037573	rs3900036	EIRA	risk	C	T	C	338	102	68	188	599	372	368	170	7.35[5.50-9.81]	1.21[0.85-1.73]	5.45[4.21-7.07]	Positive	0.22[0.04767-0.40845]	0.0132138	1	2	196037573	rs3900036	NARAC	non-risk	C	T	C	417	13	11	231	491	358	283	180	45.4[24.6-83.6]	1.41[0.60-3.28]	33.3[18.5-60.1]	Positive	0.25[0.05174-0.45977]	0.0140061	1
2	196033952	rs4146947	EIRA	risk	C	T	C	338	102	68	188	599	372	368	170	7.35[5.50-9.81]	1.21[0.85-1.73]	5.45[4.21-7.07]	Positive	0.22[0.04767-0.40845]	0.0132138	1	2	196033952	rs4146947	NARAC	non-risk	C	T	C	417	13	11	231	491	358	283	180	45.4[24.6-83.6]	1.41[0.60-3.28]	33.3[18.5-60.1]	Positive	0.25[0.05174-0.45977]	0.0140061	1
2	196033873	rs4146948	EIRA	risk	T	C	T	338	102	68	188	599	372	368	170	7.35[5.50-9.81]	1.21[0.85-1.73]	5.45[4.21-7.07]	Positive	0.22[0.04767-0.40845]	0.0132138	1	2	196033873	rs4146948	NARAC	non-risk	T	C	T	417	13	11	231	491	358	283	180	45.4[24.6-83.6]	1.41[0.60-3.28]	33.3[18.5-60.1]	Positive	0.25[0.05174-0.45977]	0.0140061	1
2	196024486	rs4850590	EIRA	risk	G	C	G	338	102	68	188	599	372	368	170	7.35[5.50-9.81]	1.21[0.85-1.73]	5.45[4.21-7.07]	Positive	0.22[0.04767-0.40845]	0.0132138	1	2	196024486	rs4850590	NARAC	non-risk	G	C	G	417	13	11	231	491	358	283	180	45.4[24.6-83.6]	1.41[0.60-3.28]	33.3[18.5-60.1]	Positive	0.25[0.05174-0.45977]	0.0140061	1
2	196024697	rs4850591	EIRA	risk	G	T	G	338	102	68	188	599	372	368	170	7.35[5.50-9.81]	1.21[0.85-1.73]	5.45[4.21-7.07]	Positive	0.22[0.04767-0.40845]	0.0132138	1	2	196024697	rs4850591	NARAC	non-risk	G	T	G	417	13	11	231	491	358	283	180	45.4[24.6-83.6]	1.41[0.60-3.28]	33.3[18.5-60.1]	Positive	0.25[0.05174-0.45977]	0.0140061	1
2	196021693	rs6434736	EIRA	risk	G	T	G	338	102	68	188	599	372	368	170	7.35[5.50-9.81]	1.21[0.85-1.73]	5.45[4.21-7.07]	Positive	0.22[0.04767-0.40845]	0.0132138	1	2	196021693	rs6434736	NARAC	non-risk	G	T	G	417	13	11	231	492	358	282	180	44.8[24.3-82.6]	1.41[0.60-3.28]	33.5[18.6-60.5]	Positive	0.24[0.03511-0.44999]	0.0219161	1
2	196033650	rs6434741	EIRA	risk	T	C	T	338	102	68	188	599	372	368	170	7.35[5.50-9.81]	1.21[0.85-1.73]	5.45[4.21-7.07]	Positive	0.22[0.04767-0.40845]	0.0132138	1	2	196033650	rs6434741	NARAC	non-risk	T	C	T	417	13	11	231	491	358	283	180	45.4[24.6-83.6]	1.41[0.60-3.28]	33.3[18.5-60.1]	Positive	0.25[0.05174-0.45977]	0.0140061	1
2	196028755	rs7422413	EIRA	risk	G	A	G	338	102	68	188	599	372	368	170	7.35[5.50-9.81]	1.21[0.85-1.73]	5.45[4.21-7.07]	Positive	0.22[0.04767-0.40845]	0.0132138	1	2	196028755	rs7422413	NARAC	non-risk	G	A	G	417	13	11	231	491	358	283	180	45.4[24.6-83.6]	1.41[0.60-3.28]	33.3[18.5-60.1]	Positive	0.25[0.05174-0.45977]	0.0140061	1
2	196024961	rs7565028	EIRA	risk	C	T	C	338	102	68	188	599	372	368	170	7.35[5.50-9.81]	1.21[0.85-1.73]	5.45[4.21-7.07]	Positive	0.22[0.04767-0.40845]	0.0132138	1	2	196024961	rs7565028	NARAC	non-risk	C	T	C	417	13	11	231	491	358	283	180	45.4[24.6-83.6]	1.41[0.60-3.28]	33.3[18.5-60.1]	Positive	0.25[0.05174-0.45977]	0.0140061	1
2	196025881	rs7582823	EIRA	risk	T	C	T	338	102	68	188	599	372	368	170	7.35[5.50-9.81]	1.21[0.85-1.73]	5.45[4.21-7.07]	Positive	0.22[0.04767-0.40845]	0.0132138	1	2	196025881	rs7582823	NARAC	non-risk	T	C	T	417	13	11	231	491	358	283	180	45.4[24.6-83.6]	1.41[0.60-3.28]	33.3[18.5-60.1]	Positive	0.25[0.05174-0.45977]	0.0140061	1
2	196035468	rs7583521	EIRA	risk	G	A	G	338	102	68	188	599	372	368	170	7.35[5.50-9.81]	1.21[0.85-1.73]	5.45[4.21-7.07]	Positive	0.22[0.04767-0.40845]	0.0132138	1	2	196035468	rs7583521	NARAC	non-risk	G	A	G	417	13	11	231	491	358	283	180	45.4[24.6-83.6]	1.41[0.60-3.28]	33.3[18.5-60.1]	Positive	0.25[0.05174-0.45977]	0.0140061	1
2	196025886	rs7595127	EIRA	risk	A	G	A	338	102	68	188	599	372	368	170	7.35[5.50-9.81]	1.21[0.85-1.73]	5.45[4.21-7.07]	Positive	0.22[0.04767-0.40845]	0.0132138	1	2	196025886	rs7595127	NARAC	non-risk	A	G	A	417	13	11	231	491	358	283	180	45.4[24.6-83.6]	1.41[0.60-3.28]	33.3[18.5-60.1]	Positive	0.25[0.05174-0.45977]	0.0140061	1
15	89250008	rs56309429	EIRA	risk	C	A	C	408	126	42	112	726	430	240	101	7.83[5.75-10.6]	1.23[0.82-1.86]	5.58[4.41-7.05]	Positive	0.25[0.05359-0.45961]	0.0132313	1	15	89250008	rs56309429	NARAC	risk	C	A	C	511	18	6	137	572	437	202	101	48.8[27.9-85.6]	1.01[0.38-2.65]	28.5[17.1-47.3]	Positive	0.41[0.22938-0.60343]	1.27721e-05	0.0409617
9	73697886	rs13285838	EIRA	risk	T	G	G	26	7	163	502	37	35	934	503	7.16[3.07-16.7]	1.23[0.52-2.91]	4.18[1.60-10.9]	Positive	0.38[0.07994-0.68683]	0.0132733	1	9	73697886	rs13285838	NARAC	non-risk	T	G	T	405	13	11	243	492	377	282	161	48.5[26.2-89.5]	1.64[0.70-3.83]	35.3[19.5-63.8]	Positive	0.25[0.05507-0.45944]	0.0126362	1
16	53870340	rs12596393	EIRA	risk	T	A	A	452	143	22	61	855	439	103	88	3.80[2.70-5.37]	1.15[0.68-1.94]	6.26[5.01-7.82]	Negative	-0.6[-1.2255--0.1420]	0.0133618	1	16	53870340	rs12596393	NARAC	non-risk	T	A	T	445	14	10	203	548	362	226	176	28.7[15.9-51.8]	1.62[0.68-3.82]	43.8[24.8-77.6]	Negative	-0.5[-0.9751--0.1189]	0.0122595	1
6	12214326	rs9367034	EIRA	non-risk	A	G	G	44	12	159	489	53	45	926	499	6.81[3.56-13.0]	1.17[0.60-2.27]	4.25[2.00-9.04]	Positive	0.35[0.07261-0.62801]	0.0134157	1	6	12214326	rs9367034	NARAC	non-risk	A	G	A	363	13	11	285	423	305	351	233	37.0[20.2-67.9]	1.00[0.43-2.33]	28.6[15.7-52.1]	Positive	0.22[0.02352-0.43054]	0.0287705	1
14	52844929	rs11626853	EIRA	non-risk	G	T	T	31	8	158	479	54	48	884	471	7.35[3.34-16.1]	1.26[0.56-2.82]	4.53[1.89-10.8]	Positive	0.34[0.07193-0.62395]	0.0134804	1	14	52844929	rs11626853	NARAC	risk	G	T	G	389	15	9	259	410	317	364	221	36.8[20.8-65.0]	1.00[0.42-2.38]	28.7[16.4-50.3]	Positive	0.22[0.01621-0.42515]	0.0343922	1
7	40881938	rs67369140	EIRA	risk	A	G	A	313	95	75	215	550	343	418	198	7.12[5.34-9.50]	1.16[0.81-1.65]	5.38[4.11-7.04]	Positive	0.22[0.04581-0.39771]	0.0134985	1	7	40881938	rs67369140	NARAC	non-risk	A	G	A	378	14	10	270	435	334	339	204	41.8[23.2-75.4]	1.12[0.48-2.63]	28.9[16.2-51.5]	Positive	0.30[0.12070-0.48916]	0.00117784	1
7	123949098	rs73231999	EIRA	risk	C	T	C	427	134	30	91	749	444	191	84	7.59[5.48-10.5]	1.05[0.66-1.66]	5.46[4.34-6.87]	Positive	0.27[0.05632-0.48995]	0.0135408	1	7	123949098	rs73231999	NARAC	non-risk	C	T	C	485	14	10	163	587	432	187	106	62.9[33.9-116.]	2.38[1.00-5.63]	38.4[21.8-67.7]	Positive	0.36[0.16647-0.56598]	0.000326264	0.549076
1	102427979	rs12758845	EIRA	risk	T	C	C	395	121	43	119	704	418	254	109	7.68[5.67-10.4]	1.17[0.78-1.76]	5.57[4.39-7.07]	Positive	0.25[0.05190-0.45213]	0.0135745	1	1	102427979	rs12758845	NARAC	non-risk	T	C	C	476	15	9	172	565	415	209	123	52.3[28.9-94.6]	1.99[0.83-4.75]	36.2[20.9-62.9]	Positive	0.28[0.07354-0.50264]	0.0084914	1
1	20978058	rs650616	EIRA	non-risk	G	A	A	431	135	33	94	807	413	161	121	4.27[3.13-5.80]	1.13[0.73-1.77]	6.39[5.09-8.04]	Negative	-0.5[-0.9520--0.1091]	0.0135964	1	1	20978058	rs650616	NARAC	non-risk	G	A	G	405	13	11	243	505	316	269	222	28.4[15.5-51.9]	1.43[0.61-3.32]	44.2[24.4-80.1]	Negative	-0.5[-0.9934--0.1510]	0.00774848	1
11	9973062	rs10500715	EIRA	non-risk	G	T	T	106	34	137	427	156	110	823	434	6.07[4.04-9.10]	1.00[0.65-1.55]	4.44[2.80-7.03]	Positive	0.26[0.05467-0.47816]	0.01366	1	11	9973062	rs10500715	NARAC	non-risk	G	T	G	208	6	18	440	223	175	551	363	41.9[18.0-97.5]	1.27[0.48-3.33]	31.1[13.2-73.4]	Positive	0.25[0.04363-0.45976]	0.0177388	1
16	53874580	rs6499652	EIRA	risk	T	C	C	467	147	23	61	869	451	103	88	3.81[2.71-5.37]	1.21[0.72-2.02]	6.20[4.98-7.72]	Negative	-0.6[-1.2192--0.1393]	0.0136617	1	16	53874580	rs6499652	NARAC	non-risk	T	C	T	445	14	10	203	548	362	226	176	28.7[15.9-51.8]	1.62[0.68-3.82]	43.8[24.8-77.6]	Negative	-0.5[-0.9751--0.1189]	0.0122595	1
14	39971326	rs35207438	EIRA	non-risk	T	A	T	355	108	62	178	637	384	341	156	7.31[5.48-9.76]	1.12[0.78-1.62]	5.49[4.27-7.06]	Positive	0.23[0.04739-0.41520]	0.0136961	1	14	39971326	rs35207438	NARAC	non-risk	T	A	T	433	12	12	215	488	377	286	161	54.6[29.0-102.]	1.89[0.81-4.40]	36.8[20.0-67.7]	Positive	0.30[0.11693-0.50080]	0.00161001	1
4	14246872	rs1549458	EIRA	risk	C	T	T	408	126	45	117	732	433	236	99	7.71[5.66-10.5]	1.21[0.81-1.81]	5.52[4.37-6.97]	Positive	0.25[0.05236-0.46030]	0.0137697	1	4	14246872	rs1549458	NARAC	non-risk	C	T	T	474	14	10	174	585	423	189	115	50.9[27.6-93.6]	1.84[0.78-4.35]	36.8[20.9-64.8]	Positive	0.26[0.02894-0.49244]	0.0274679	1
16	53876542	rs7203883	EIRA	risk	A	G	G	469	147	22	56	863	456	97	85	3.76[2.65-5.33]	1.26[0.74-2.14]	6.15[4.94-7.65]	Negative	-0.7[-1.2674--0.1434]	0.013876	1	16	53876542	rs7203883	NARAC	non-risk	A	G	A	442	14	10	206	546	360	228	178	28.7[15.9-51.9]	1.59[0.67-3.77]	43.6[24.6-77.2]	Negative	-0.5[-0.9616--0.1122]	0.0132152	1
16	53875016	rs2111115	EIRA	risk	G	A	A	472	148	23	61	876	456	103	88	3.84[2.72-5.41]	1.21[0.72-2.03]	6.22[5.00-7.73]	Negative	-0.6[-1.2136--0.1369]	0.0139413	1	16	53875016	rs2111115	NARAC	non-risk	G	A	G	445	14	10	203	548	362	226	176	28.7[15.9-51.8]	1.62[0.68-3.82]	43.8[24.8-77.6]	Negative	-0.5[-0.9751--0.1189]	0.0122595	1
2	196042631	rs7571501	EIRA	risk	G	T	G	337	102	68	188	598	371	367	170	7.30[5.47-9.75]	1.21[0.84-1.73]	5.44[4.19-7.05]	Positive	0.22[0.04568-0.40743]	0.0140883	1	2	196042631	rs7571501	NARAC	non-risk	G	T	G	417	13	11	231	491	358	283	180	45.4[24.6-83.6]	1.41[0.60-3.28]	33.3[18.5-60.1]	Positive	0.25[0.05174-0.45977]	0.0140061	1
14	75909897	rs909223	EIRA	non-risk	G	A	A	106	33	134	411	165	117	787	415	6.20[4.11-9.35]	1.04[0.67-1.62]	4.54[2.87-7.18]	Positive	0.26[0.05239-0.46812]	0.0141257	1	14	75909897	rs909223	NARAC	risk	G	A	G	234	7	17	414	232	194	542	344	41.3[18.8-90.4]	1.28[0.51-3.22]	32.1[14.4-71.3]	Positive	0.21[0.00085-0.42972]	0.0490874	1
8	15851074	rs13264098	EIRA	risk	C	G	C	480	152	16	42	856	494	100	36	8.76[5.73-13.3]	1.20[0.65-2.20]	5.56[4.48-6.89]	Positive	0.34[0.06833-0.61630]	0.0143325	1	8	15851074	rs13264098	NARAC	non-risk	C	G	C	577	18	6	71	697	498	77	40	59.0[30.7-113.]	2.22[0.80-6.13]	35.4[21.4-58.3]	Positive	0.37[0.09007-0.66954]	0.0101882	1
7	54618010	rs2293343	EIRA	non-risk	C	T	C	173	52	112	341	293	195	644	326	6.65[4.73-9.35]	1.09[0.74-1.59]	5.04[3.51-7.24]	Positive	0.22[0.04516-0.41021]	0.014484	1	7	54618010	rs2293343	NARAC	risk	C	T	C	262	8	16	386	271	224	503	314	39.7[19.0-83.1]	1.12[0.46-2.74]	27.9[13.2-58.9]	Positive	0.29[0.10705-0.48156]	0.00206573	1
2	196064399	rs4850595	EIRA	non-risk	C	T	C	398	123	38	111	713	432	220	98	7.45[5.44-10.2]	1.11[0.73-1.70]	5.40[4.26-6.85]	Positive	0.25[0.05132-0.46658]	0.0145035	1	2	196064399	rs4850595	NARAC	non-risk	C	T	C	501	17	7	147	600	430	174	108	46.5[26.1-82.8]	1.46[0.58-3.71]	33.0[19.6-55.6]	Positive	0.27[0.04840-0.51005]	0.0177377	1
2	196064468	rs4850596	EIRA	non-risk	T	A	T	398	123	38	111	713	432	220	98	7.45[5.44-10.2]	1.11[0.73-1.70]	5.40[4.26-6.85]	Positive	0.25[0.05132-0.46658]	0.0145035	1	2	196064468	rs4850596	NARAC	non-risk	T	A	T	501	17	7	147	600	430	174	108	46.5[26.1-82.8]	1.46[0.58-3.71]	33.0[19.6-55.6]	Positive	0.27[0.04840-0.51005]	0.0177377	1
2	196028867	rs961191	EIRA	risk	C	T	C	337	102	68	189	598	370	368	170	7.34[5.49-9.80]	1.20[0.84-1.72]	5.47[4.22-7.09]	Positive	0.22[0.04469-0.40688]	0.0145376	1	2	196028867	rs961191	NARAC	non-risk	C	T	C	417	13	11	231	491	358	283	180	45.4[24.6-83.6]	1.41[0.60-3.28]	33.3[18.5-60.1]	Positive	0.25[0.05174-0.45977]	0.0140061	1
1	110961722	rs6537657	EIRA	non-risk	T	C	C	35	11	159	493	41	36	935	505	5.89[2.96-11.7]	1.00[0.49-2.03]	3.62[1.60-8.19]	Positive	0.38[0.07577-0.69257]	0.0146232	1	1	110961722	rs6537657	NARAC	risk	T	C	T	406	13	11	242	445	332	329	206	42.6[23.3-77.8]	1.35[0.58-3.15]	32.7[18.1-59.1]	Positive	0.22[0.01672-0.42946]	0.0341034	1
4	107386029	rs9685568	EIRA	non-risk	C	A	C	335	103	61	178	587	363	349	162	7.11[5.31-9.51]	1.12[0.77-1.62]	5.36[4.14-6.94]	Positive	0.22[0.04486-0.41224]	0.0147378	1	4	107386029	rs9685568	NARAC	risk	C	A	C	443	15	9	205	517	389	257	149	41.7[23.4-74.4]	1.25[0.52-2.98]	31.8[18.3-55.2]	Positive	0.23[0.01598-0.44595]	0.0352283	1
13	83265098	rs9546221	EIRA	non-risk	G	T	T	405	120	44	107	784	396	171	124	4.74[3.47-6.46]	1.37[0.91-2.06]	6.77[5.33-8.59]	Negative	-0.5[-0.9158--0.0996]	0.0147415	1	13	83265098	rs9546221	NARAC	non-risk	T	G	G	500	18	6	148	607	400	167	138	24.0[13.9-41.5]	1.02[0.38-2.72]	35.5[21.3-59.0]	Negative	-0.4[-0.9236--0.0338]	0.0349229	1
19	46928615	rs7247706	EIRA	non-risk	A	G	A	164	36	134	350	304	139	652	385	7.86[5.35-11.5]	1.75[1.16-2.65]	10.3[6.81-15.6]	Negative	-0.4[-0.7389--0.0803]	0.014765	1	19	46928615	rs7247706	NARAC	non-risk	A	G	A	478	11	13	170	572	350	202	188	39.5[20.5-75.8]	3.86[1.64-9.05]	61.8[32.8-116.]	Negative	-0.6[-1.0940--0.1822]	0.00607914	1
6	70891740	rs10945200	EIRA	non-risk	A	G	G	99	27	144	434	165	121	814	423	7.23[4.62-11.3]	1.23[0.76-1.97]	5.18[3.17-8.47]	Positive	0.25[0.04909-0.45324]	0.0148423	1	6	70891740	rs10945200	NARAC	non-risk	A	G	A	197	7	17	451	229	170	545	368	35.4[16.0-78.4]	1.02[0.40-2.58]	27.1[12.0-61.0]	Positive	0.23[0.01942-0.44777]	0.0325394	1
2	196042593	rs7585475	EIRA	risk	T	G	T	335	102	68	186	598	370	368	170	7.27[5.45-9.71]	1.21[0.85-1.74]	5.42[4.18-7.02]	Positive	0.22[0.04401-0.40649]	0.014853	1	2	196042593	rs7585475	NARAC	non-risk	T	G	T	417	13	11	231	491	358	283	180	45.4[24.6-83.6]	1.41[0.60-3.28]	33.3[18.5-60.1]	Positive	0.25[0.05174-0.45977]	0.0140061	1
6	77376716	rs1457932	EIRA	risk	A	G	G	22	6	159	497	18	19	918	509	6.64[2.67-16.5]	1.15[0.45-2.90]	3.44[1.13-10.4]	Positive	0.45[0.08895-0.82588]	0.0149663	1	6	77376716	rs1457932	NARAC	non-risk	A	G	A	439	15	9	209	508	390	266	148	38.8[21.8-69.3]	1.04[0.43-2.48]	30.0[17.3-52.1]	Positive	0.22[0.00939-0.44350]	0.0408725	1
21	36818277	rs2898239	EIRA	risk	C	T	C	338	99	70	188	571	358	388	180	7.53[5.65-10.0]	1.28[0.90-1.83]	5.57[4.28-7.23]	Positive	0.22[0.04314-0.40096]	0.0149859	1	21	36818277	rs2898239	NARAC	non-risk	C	T	C	413	12	12	235	490	371	284	167	47.9[25.5-90.1]	1.62[0.69-3.77]	36.0[19.5-66.2]	Positive	0.23[0.02672-0.44539]	0.0270903	1
14	39974186	rs34855045	EIRA	non-risk	G	C	G	352	108	62	178	632	382	343	158	7.19[5.39-9.59]	1.11[0.77-1.60]	5.43[4.22-6.98]	Positive	0.22[0.04444-0.41304]	0.0149863	1	14	39974186	rs34855045	NARAC	non-risk	G	C	G	433	12	12	215	487	377	287	161	55.1[29.3-103.]	1.89[0.81-4.40]	36.6[19.9-67.4]	Positive	0.31[0.12925-0.50802]	0.000974818	1
14	39975927	rs8020250	EIRA	non-risk	A	G	A	352	108	62	178	632	382	343	158	7.19[5.39-9.59]	1.11[0.77-1.60]	5.43[4.22-6.98]	Positive	0.22[0.04444-0.41304]	0.0149863	1	14	39975927	rs8020250	NARAC	non-risk	A	G	A	433	12	12	215	487	377	287	161	55.1[29.3-103.]	1.89[0.81-4.40]	36.6[19.9-67.4]	Positive	0.31[0.12925-0.50802]	0.000974818	1
5	179014900	rs6874476	EIRA	non-risk	T	A	A	68	20	143	445	123	92	817	433	6.38[3.82-10.6]	1.06[0.62-1.81]	4.52[2.56-7.99]	Positive	0.28[0.05429-0.50687]	0.0150859	1	5	179014900	rs6874476	NARAC	risk	T	A	T	258	9	15	390	282	239	492	299	38.6[19.0-78.2]	1.09[0.46-2.60]	28.0[13.7-57.2]	Positive	0.27[0.07889-0.46357]	0.00570955	1
17	11562294	rs62060825	EIRA	risk	A	G	A	374	118	48	141	651	388	300	134	7.25[5.41-9.71]	1.10[0.74-1.62]	5.43[4.25-6.93]	Positive	0.23[0.04588-0.42843]	0.0150893	1	17	11562294	rs62060825	NARAC	non-risk	A	G	A	434	14	10	214	527	382	247	156	45.4[25.0-82.6]	1.36[0.58-3.21]	32.7[18.5-57.8]	Positive	0.27[0.06400-0.47823]	0.0102976	1
13	75876389	rs2297208	EIRA	risk	G	A	G	176	51	120	357	294	198	685	346	7.09[5.04-9.97]	1.19[0.82-1.74]	5.32[3.70-7.65]	Positive	0.22[0.04276-0.40094]	0.0151834	1	13	75876389	rs2297208	NARAC	non-risk	G	A	G	206	6	18	442	241	198	533	340	47.9[20.5-112.]	1.54[0.58-4.06]	36.3[15.3-86.1]	Positive	0.22[0.02174-0.43777]	0.0303984	1
2	196003419	rs699320	EIRA	risk	A	C	A	342	103	68	189	606	373	371	171	7.37[5.52-9.83]	1.21[0.84-1.72]	5.51[4.25-7.13]	Positive	0.22[0.04312-0.40451]	0.0151903	1	2	196003419	rs699320	NARAC	non-risk	A	C	A	421	13	11	227	493	359	281	179	45.3[24.6-83.6]	1.45[0.62-3.38]	33.9[18.8-61.1]	Positive	0.24[0.03551-0.45017]	0.021691	1
14	38131522	rs177888	EIRA	risk	A	G	G	94	29	138	433	148	109	811	429	6.20[4.01-9.58]	1.03[0.65-1.63]	4.52[2.78-7.36]	Positive	0.26[0.05108-0.48046]	0.0152487	1	14	38131522	rs177888	NARAC	risk	A	G	A	222	7	17	426	225	199	549	339	46.3[20.9-102.]	1.46[0.58-3.69]	33.2[14.7-74.7]	Positive	0.27[0.07404-0.47204]	0.00715973	1
6	70888392	rs12192464	EIRA	non-risk	T	C	C	99	27	144	434	165	121	813	423	7.22[4.62-11.3]	1.23[0.76-1.97]	5.18[3.17-8.47]	Positive	0.25[0.04810-0.45268]	0.0152606	1	6	70888392	rs12192464	NARAC	non-risk	T	C	T	197	7	17	451	229	170	545	368	35.4[16.0-78.4]	1.02[0.40-2.58]	27.1[12.0-61.0]	Positive	0.23[0.01942-0.44777]	0.0325394	1
6	70886743	rs3806051	EIRA	non-risk	A	T	T	99	27	144	434	165	121	813	423	7.22[4.62-11.3]	1.23[0.76-1.97]	5.18[3.17-8.47]	Positive	0.25[0.04810-0.45268]	0.0152606	1	6	70886743	rs3806051	NARAC	non-risk	A	T	A	197	7	17	451	229	170	545	368	35.4[16.0-78.4]	1.02[0.40-2.58]	27.1[12.0-61.0]	Positive	0.23[0.01942-0.44777]	0.0325394	1
6	70886784	rs3806052	EIRA	non-risk	C	A	A	99	27	144	434	165	121	813	423	7.22[4.62-11.3]	1.23[0.76-1.97]	5.18[3.17-8.47]	Positive	0.25[0.04810-0.45268]	0.0152606	1	6	70886784	rs3806052	NARAC	non-risk	C	A	C	197	7	17	451	229	170	545	368	35.4[16.0-78.4]	1.02[0.40-2.58]	27.1[12.0-61.0]	Positive	0.23[0.01942-0.44777]	0.0325394	1
15	39172049	rs17660503	EIRA	non-risk	A	G	A	422	130	32	90	786	453	160	66	8.27[5.82-11.7]	1.17[0.75-1.84]	5.73[4.55-7.22]	Positive	0.28[0.05461-0.51547]	0.0153264	1	15	39172049	rs17660503	NARAC	non-risk	A	G	A	547	18	6	101	642	464	132	74	48.8[27.1-87.8]	1.73[0.64-4.65]	33.9[20.5-56.1]	Positive	0.28[0.02915-0.54990]	0.0292982	1
2	196014061	rs2370193	EIRA	non-risk	C	T	C	370	119	50	143	665	404	288	131	6.99[5.21-9.39]	1.10[0.75-1.61]	5.22[4.09-6.65]	Positive	0.23[0.04579-0.43222]	0.0153274	1	2	196014061	rs2370193	NARAC	non-risk	C	T	C	461	16	8	187	554	401	220	137	42.6[24.0-75.7]	1.20[0.49-2.94]	31.4[18.3-53.6]	Positive	0.25[0.03908-0.47898]	0.020982	1
2	207981241	rs2244089	EIRA	risk	G	T	T	26	6	165	507	23	24	956	520	8.21[3.32-20.2]	1.43[0.57-3.57]	4.39[1.51-12.7]	Positive	0.41[0.07898-0.74611]	0.0153462	1	2	207981241	rs2244089	NARAC	risk	G	T	G	464	14	10	184	484	393	290	145	54.5[30.1-98.6]	1.94[0.82-4.56]	34.7[19.6-61.3]	Positive	0.34[0.16309-0.52792]	0.000205271	0.475753
14	38139214	rs177899	EIRA	risk	G	A	A	94	29	139	433	148	109	812	429	6.21[4.02-9.60]	1.03[0.65-1.64]	4.52[2.78-7.36]	Positive	0.26[0.05078-0.47984]	0.0153527	1	14	38139214	rs177899	NARAC	risk	G	A	G	222	7	17	426	225	199	549	339	46.3[20.9-102.]	1.46[0.58-3.69]	33.2[14.7-74.7]	Positive	0.27[0.07404-0.47204]	0.00715973	1
6	70888876	rs3793064	EIRA	non-risk	A	T	T	99	27	144	433	165	121	813	423	7.22[4.62-11.3]	1.23[0.77-1.97]	5.18[3.17-8.46]	Positive	0.25[0.04767-0.45233]	0.0154438	1	6	70888876	rs3793064	NARAC	non-risk	A	T	A	197	7	17	451	229	170	545	368	35.4[16.0-78.4]	1.02[0.40-2.58]	27.1[12.0-61.0]	Positive	0.23[0.01942-0.44777]	0.0325394	1
16	53876607	rs7204060	EIRA	risk	T	G	G	469	146	22	56	863	456	97	84	3.82[2.70-5.43]	1.27[0.75-2.16]	6.18[4.96-7.70]	Negative	-0.6[-1.2446--0.1302]	0.015598	1	16	53876607	rs7204060	NARAC	non-risk	T	G	T	442	14	10	206	546	360	228	178	28.7[15.9-51.9]	1.59[0.67-3.77]	43.6[24.6-77.2]	Negative	-0.5[-0.9616--0.1122]	0.0132152	1
16	53876566	rs7205213	EIRA	risk	T	C	C	469	146	22	56	863	456	97	84	3.82[2.70-5.43]	1.27[0.75-2.16]	6.18[4.96-7.70]	Negative	-0.6[-1.2446--0.1302]	0.015598	1	16	53876566	rs7205213	NARAC	non-risk	T	C	T	442	14	10	206	546	360	228	178	28.7[15.9-51.9]	1.59[0.67-3.77]	43.6[24.6-77.2]	Negative	-0.5[-0.9616--0.1122]	0.0132152	1
14	38096069	rs466255	EIRA	risk	A	G	G	97	29	139	434	153	111	816	427	6.46[4.18-9.96]	1.06[0.67-1.68]	4.70[2.90-7.63]	Positive	0.26[0.04927-0.47259]	0.015681	1	14	38096069	rs466255	NARAC	risk	A	G	A	214	7	17	434	222	197	552	341	43.8[19.7-97.2]	1.34[0.53-3.40]	31.5[14.0-71.0]	Positive	0.27[0.07188-0.47241]	0.00773257	1
18	75321175	rs165123	EIRA	risk	T	C	C	57	15	145	453	76	60	867	453	7.24[4.05-12.9]	1.18[0.65-2.16]	4.80[2.47-9.32]	Positive	0.31[0.05880-0.56475]	0.0157083	1	18	75321175	rs165123	NARAC	risk	T	C	T	304	10	14	344	335	277	439	261	43.1[22.0-84.6]	1.30[0.55-3.04]	31.5[16.0-61.8]	Positive	0.26[0.07089-0.45554]	0.00730768	1
14	38126280	rs177871	EIRA	risk	A	G	G	94	29	134	430	150	110	797	422	6.19[4.01-9.57]	1.00[0.63-1.59]	4.54[2.79-7.39]	Positive	0.26[0.04970-0.47998]	0.0158284	1	14	38126280	rs177871	NARAC	non-risk	A	G	A	217	7	17	431	223	197	551	341	45.0[20.3-99.9]	1.40[0.55-3.54]	32.3[14.3-72.6]	Positive	0.27[0.07488-0.47364]	0.0070146	1
3	28007315	rs12630663	EIRA	non-risk	C	T	T	76	23	142	429	131	95	800	417	6.32[3.90-10.2]	1.06[0.64-1.76]	4.51[2.63-7.73]	Positive	0.27[0.05154-0.49996]	0.0159262	1	3	28007315	rs12630663	NARAC	non-risk	C	T	C	219	7	17	429	263	207	511	331	39.3[17.7-87.0]	1.11[0.44-2.81]	28.2[12.6-63.1]	Positive	0.27[0.08507-0.47031]	0.00471836	1
14	39931584	rs12589427	EIRA	non-risk	G	A	G	351	104	63	178	634	384	344	158	7.47[5.59-9.98]	1.17[0.81-1.69]	5.60[4.34-7.23]	Positive	0.22[0.04218-0.41036]	0.0159892	1	14	39931584	rs12589427	NARAC	non-risk	G	A	G	431	12	12	217	489	374	285	164	52.9[28.1-99.3]	1.87[0.80-4.35]	37.1[20.2-68.3]	Positive	0.28[0.08194-0.47998]	0.00565678	1
14	39950358	rs17109300	EIRA	non-risk	A	G	A	351	104	63	178	634	384	344	158	7.47[5.59-9.98]	1.17[0.81-1.69]	5.60[4.34-7.23]	Positive	0.22[0.04218-0.41036]	0.0159892	1	14	39950358	rs17109300	NARAC	non-risk	A	G	A	432	12	12	216	489	374	285	164	52.9[28.2-99.4]	1.88[0.80-4.37]	37.2[20.2-68.3]	Positive	0.28[0.08185-0.47991]	0.00567268	1
14	39929476	rs1955718	EIRA	non-risk	T	C	T	351	104	63	178	634	384	344	158	7.47[5.59-9.98]	1.17[0.81-1.69]	5.60[4.34-7.23]	Positive	0.22[0.04218-0.41036]	0.0159892	1	14	39929476	rs1955718	NARAC	non-risk	T	C	T	430	12	12	218	489	374	285	164	52.8[28.1-99.1]	1.86[0.80-4.32]	37.1[20.1-68.1]	Positive	0.28[0.08220-0.48011]	0.00560771	1
14	39943868	rs2057138	EIRA	non-risk	G	T	G	351	104	63	178	634	384	344	158	7.47[5.59-9.98]	1.17[0.81-1.69]	5.60[4.34-7.23]	Positive	0.22[0.04218-0.41036]	0.0159892	1	14	39943868	rs2057138	NARAC	non-risk	G	T	G	432	12	12	216	489	374	285	164	52.9[28.2-99.4]	1.88[0.80-4.37]	37.2[20.2-68.3]	Positive	0.28[0.08185-0.47991]	0.00567268	1
14	39945233	rs34687394	EIRA	non-risk	T	A	T	351	104	63	178	634	384	344	158	7.47[5.59-9.98]	1.17[0.81-1.69]	5.60[4.34-7.23]	Positive	0.22[0.04218-0.41036]	0.0159892	1	14	39945233	rs34687394	NARAC	non-risk	T	A	T	432	12	12	216	489	374	285	164	52.9[28.2-99.4]	1.88[0.80-4.37]	37.2[20.2-68.3]	Positive	0.28[0.08185-0.47991]	0.00567268	1
14	39939758	rs4902692	EIRA	non-risk	G	C	G	351	104	63	178	634	384	344	158	7.47[5.59-9.98]	1.17[0.81-1.69]	5.60[4.34-7.23]	Positive	0.22[0.04218-0.41036]	0.0159892	1	14	39939758	rs4902692	NARAC	non-risk	G	C	G	432	12	12	216	489	374	285	164	52.9[28.2-99.4]	1.88[0.80-4.37]	37.2[20.2-68.3]	Positive	0.28[0.08185-0.47991]	0.00567268	1
14	39972907	rs11848089	EIRA	non-risk	A	C	A	329	100	70	204	579	355	398	188	7.06[5.31-9.38]	1.10[0.77-1.58]	5.40[4.15-7.01]	Positive	0.21[0.04084-0.39874]	0.0160705	1	14	39972907	rs11848089	NARAC	non-risk	A	C	A	372	10	14	276	425	332	349	206	54.1[27.5-106.]	1.94[0.82-4.55]	39.0[20.0-75.9]	Positive	0.26[0.06757-0.45386]	0.00814975	1
14	39952870	rs12884747	EIRA	non-risk	A	G	A	352	104	63	178	634	384	344	158	7.49[5.60-10.0]	1.17[0.81-1.69]	5.62[4.36-7.24]	Positive	0.22[0.04187-0.41010]	0.0161393	1	14	39952870	rs12884747	NARAC	non-risk	A	G	A	432	12	12	216	489	374	285	164	52.9[28.2-99.4]	1.88[0.80-4.37]	37.2[20.2-68.3]	Positive	0.28[0.08185-0.47991]	0.00567268	1
14	39953332	rs35643160	EIRA	non-risk	A	G	A	352	104	63	178	634	384	344	158	7.49[5.60-10.0]	1.17[0.81-1.69]	5.62[4.36-7.24]	Positive	0.22[0.04187-0.41010]	0.0161393	1	14	39953332	rs35643160	NARAC	non-risk	A	G	A	432	12	12	216	489	374	285	164	52.9[28.2-99.4]	1.88[0.80-4.37]	37.2[20.2-68.3]	Positive	0.28[0.08185-0.47991]	0.00567268	1
2	34221283	rs13398746	EIRA	non-risk	A	G	A	284	88	75	229	464	293	483	237	6.62[4.96-8.82]	1.03[0.72-1.48]	5.15[3.88-6.82]	Positive	0.21[0.04002-0.39302]	0.0161958	1	2	34221283	rs13398746	NARAC	risk	A	G	A	372	10	14	276	393	304	381	234	47.4[24.2-92.7]	1.63[0.69-3.83]	36.7[18.9-71.5]	Positive	0.21[0.00703-0.41579]	0.0426132	1
1	62303859	rs4456122	EIRA	risk	A	G	A	253	76	95	280	396	254	583	290	6.77[5.05-9.09]	1.11[0.78-1.57]	5.21[3.85-7.05]	Positive	0.21[0.03947-0.38820]	0.0162276	1	1	62303859	rs4456122	NARAC	non-risk	A	G	A	303	8	16	345	350	259	424	279	52.0[24.8-109.]	1.83[0.75-4.45]	39.9[19.0-83.9]	Positive	0.21[0.01290-0.41807]	0.037078	1
2	47177787	rs2033533	EIRA	non-risk	T	G	G	520	165	6	13	942	533	37	11	11.2[5.58-22.5]	1.32[0.48-3.58]	5.63[4.58-6.92]	Positive	0.46[0.08645-0.85136]	0.0162572	1	2	47177787	rs2033533	NARAC	non-risk	T	G	T	404	12	12	244	479	364	295	174	45.7[24.4-85.7]	1.52[0.65-3.53]	35.1[19.0-64.7]	Positive	0.22[0.00936-0.43194]	0.0406699	1
2	18089784	rs13018733	EIRA	risk	A	G	A	291	89	75	218	517	318	425	200	7.02[5.24-9.42]	1.11[0.78-1.59]	5.37[4.07-7.08]	Positive	0.21[0.04027-0.39736]	0.0163009	1	2	18089784	rs13018733	NARAC	non-risk	A	G	A	398	10	14	250	468	340	306	198	59.5[30.3-117.]	2.47[1.05-5.79]	43.8[22.6-84.9]	Positive	0.23[0.03366-0.44331]	0.0224821	1
7	50488209	rs1002371	EIRA	non-risk	T	C	T	351	111	53	166	660	397	288	133	7.00[5.19-9.44]	1.01[0.69-1.47]	5.34[4.16-6.85]	Positive	0.23[0.04338-0.42830]	0.0163131	1	7	50488209	rs1002371	NARAC	non-risk	T	C	T	433	15	9	215	516	378	258	160	41.5[23.3-74.0]	1.20[0.50-2.87]	31.4[18.1-54.5]	Positive	0.23[0.02199-0.45565]	0.030862	1
7	50485589	rs28573146	EIRA	non-risk	T	C	T	351	111	53	166	660	397	288	133	7.00[5.19-9.44]	1.01[0.69-1.47]	5.34[4.16-6.85]	Positive	0.23[0.04338-0.42830]	0.0163131	1	7	50485589	rs28573146	NARAC	non-risk	T	C	T	433	15	9	215	516	378	258	160	41.5[23.3-74.0]	1.20[0.50-2.87]	31.4[18.1-54.5]	Positive	0.23[0.02199-0.45565]	0.030862	1
1	218138198	rs4568892	EIRA	non-risk	C	G	C	374	112	59	157	697	356	274	186	4.96[3.73-6.58]	1.26[0.87-1.82]	6.69[5.22-8.58]	Negative	-0.4[-0.7304--0.0737]	0.0163953	1	1	218138198	rs4568892	NARAC	non-risk	C	G	G	532	18	6	116	638	407	136	131	25.5[14.6-44.5]	1.76[0.66-4.66]	39.6[23.8-65.8]	Negative	-0.5[-1.0783--0.0895]	0.0206181	1
2	196079530	rs4850597	EIRA	non-risk	T	C	T	399	123	39	112	715	431	221	98	7.50[5.47-10.2]	1.14[0.75-1.73]	5.44[4.29-6.90]	Positive	0.25[0.04676-0.46348]	0.016398	1	2	196079530	rs4850597	NARAC	non-risk	T	C	T	502	17	7	146	600	430	174	108	46.6[26.2-82.9]	1.47[0.58-3.73]	33.1[19.7-55.7]	Positive	0.27[0.04829-0.50983]	0.0177801	1
14	39961735	rs1950334	EIRA	non-risk	T	C	T	355	107	63	178	634	384	341	157	7.33[5.49-9.78]	1.15[0.80-1.66]	5.51[4.28-7.09]	Positive	0.22[0.04135-0.41083]	0.0164534	1	14	39961735	rs1950334	NARAC	non-risk	T	C	T	432	12	12	216	489	377	285	161	54.2[28.8-101.]	1.88[0.80-4.37]	36.8[20.0-67.7]	Positive	0.30[0.11131-0.49784]	0.0020092	1
20	7420179	rs7270010	EIRA	risk	T	C	C	27	7	163	502	20	20	946	519	7.35[3.17-17.0]	1.29[0.54-3.03]	3.88[1.37-10.9]	Positive	0.43[0.07913-0.78642]	0.0164581	1	20	7420179	rs7270010	NARAC	non-risk	T	C	T	427	16	8	221	497	381	277	157	41.3[23.5-72.5]	1.04[0.42-2.54]	28.8[16.8-49.3]	Positive	0.30[0.10799-0.49606]	0.00228139	1
6	116813933	rs9398436	EIRA	risk	G	A	A	63	14	152	445	91	73	838	444	8.43[4.66-15.2]	1.49[0.81-2.75]	5.54[2.87-10.6]	Positive	0.28[0.05187-0.51583]	0.0164728	1	6	116813933	rs9398436	NARAC	non-risk	G	A	G	264	10	14	384	305	240	469	298	37.1[18.9-72.8]	1.08[0.46-2.55]	29.2[14.8-57.8]	Positive	0.20[0.00088-0.41808]	0.0490292	1
9	123871481	rs10739590	EIRA	risk	A	G	A	162	51	120	370	252	170	727	374	6.16[4.38-8.66]	1.00[0.68-1.46]	4.73[3.26-6.86]	Positive	0.23[0.04207-0.41934]	0.0165233	1	9	123871481	rs10739590	NARAC	risk	A	G	A	238	7	17	410	236	210	538	328	40.1[18.2-87.9]	1.16[0.46-2.92]	28.1[12.6-62.6]	Positive	0.29[0.10077-0.48447]	0.00279348	1
9	123876305	rs2146838	EIRA	risk	G	A	G	162	51	120	370	252	170	727	374	6.16[4.38-8.66]	1.00[0.68-1.46]	4.73[3.26-6.86]	Positive	0.23[0.04207-0.41934]	0.0165233	1	9	123876305	rs2146838	NARAC	risk	G	A	G	238	7	17	410	236	210	538	328	40.1[18.2-87.9]	1.16[0.46-2.92]	28.1[12.6-62.6]	Positive	0.29[0.10077-0.48447]	0.00279348	1
9	123881199	rs4837810	EIRA	risk	T	C	T	162	51	120	370	252	170	727	374	6.16[4.38-8.66]	1.00[0.68-1.46]	4.73[3.26-6.86]	Positive	0.23[0.04207-0.41934]	0.0165233	1	9	123881199	rs4837810	NARAC	risk	T	C	T	238	7	17	410	236	210	538	328	40.1[18.2-87.9]	1.16[0.46-2.92]	28.1[12.6-62.6]	Positive	0.29[0.10077-0.48447]	0.00279348	1
9	123862051	rs7020581	EIRA	risk	A	G	A	162	51	120	370	252	170	727	374	6.16[4.38-8.66]	1.00[0.68-1.46]	4.73[3.26-6.86]	Positive	0.23[0.04207-0.41934]	0.0165233	1	9	123862051	rs7020581	NARAC	risk	A	G	A	238	7	17	410	236	210	538	328	40.1[18.2-87.9]	1.16[0.46-2.92]	28.1[12.6-62.6]	Positive	0.29[0.10077-0.48447]	0.00279348	1
9	123889366	rs7874864	EIRA	risk	C	T	C	162	51	120	370	252	170	727	374	6.16[4.38-8.66]	1.00[0.68-1.46]	4.73[3.26-6.86]	Positive	0.23[0.04207-0.41934]	0.0165233	1	9	123889366	rs7874864	NARAC	risk	C	T	C	238	7	17	410	236	210	538	328	40.1[18.2-87.9]	1.16[0.46-2.92]	28.1[12.6-62.6]	Positive	0.29[0.10077-0.48447]	0.00279348	1
8	53464649	rs2033934	EIRA	non-risk	C	T	T	29	8	158	493	69	56	895	473	7.02[3.17-15.5]	1.16[0.52-2.61]	4.55[1.92-10.7]	Positive	0.32[0.05962-0.59689]	0.0166184	1	8	53464649	rs2033934	NARAC	non-risk	C	T	C	351	9	15	297	381	291	393	247	53.0[26.2-107.]	1.96[0.82-4.66]	40.9[20.3-82.4]	Positive	0.20[0.00551-0.41375]	0.044123	1
14	39968560	rs17109328	EIRA	non-risk	A	G	A	355	108	63	178	637	385	341	157	7.26[5.44-9.69]	1.14[0.79-1.64]	5.48[4.26-7.04]	Positive	0.22[0.04099-0.41062]	0.0166317	1	14	39968560	rs17109328	NARAC	non-risk	A	G	A	433	12	12	215	489	377	285	161	54.4[28.9-102.]	1.89[0.81-4.40]	36.9[20.1-67.8]	Positive	0.30[0.11161-0.49799]	0.00198542	1
14	39967810	rs35923045	EIRA	non-risk	G	A	G	355	108	63	178	637	385	341	157	7.26[5.44-9.69]	1.14[0.79-1.64]	5.48[4.26-7.04]	Positive	0.22[0.04099-0.41062]	0.0166317	1	14	39967810	rs35923045	NARAC	non-risk	G	A	G	433	12	12	215	489	377	285	161	54.4[28.9-102.]	1.89[0.81-4.40]	36.9[20.1-67.8]	Positive	0.30[0.11161-0.49799]	0.00198542	1
20	7419920	rs6117805	EIRA	non-risk	T	C	C	27	7	163	500	20	20	942	517	7.35[3.17-17.0]	1.29[0.55-3.04]	3.88[1.37-10.9]	Positive	0.43[0.07775-0.78554]	0.0168198	1	20	7419920	rs6117805	NARAC	non-risk	T	C	T	427	16	8	221	495	381	279	157	41.9[23.8-73.5]	1.04[0.42-2.54]	28.6[16.7-49.0]	Positive	0.31[0.12556-0.50598]	0.00113858	1
2	196006399	rs1511276	EIRA	risk	C	T	C	337	103	68	187	599	370	367	170	7.24[5.43-9.67]	1.20[0.84-1.72]	5.42[4.19-7.03]	Positive	0.22[0.03993-0.40414]	0.0168577	1	2	196006399	rs1511276	NARAC	non-risk	C	T	C	418	13	11	230	492	358	282	180	44.8[24.3-82.6]	1.41[0.60-3.29]	33.5[18.6-60.5]	Positive	0.24[0.03508-0.44999]	0.021937	1
18	69406258	rs62100395	EIRA	non-risk	C	T	C	402	122	39	111	715	425	218	95	7.80[5.68-10.7]	1.16[0.76-1.76]	5.64[4.45-7.16]	Positive	0.25[0.04587-0.46534]	0.0169075	1	18	69406258	rs62100395	NARAC	non-risk	C	T	C	473	18	6	175	576	417	198	121	40.5[23.3-70.6]	1.13[0.43-2.97]	31.0[18.6-51.6]	Positive	0.23[0.00166-0.46153]	0.0483639	1
20	7419343	rs73600108	EIRA	non-risk	C	T	T	27	7	163	500	20	20	945	519	7.36[3.17-17.0]	1.29[0.55-3.05]	3.88[1.37-11.0]	Positive	0.43[0.07726-0.78518]	0.0169483	1	20	7419343	rs73600108	NARAC	non-risk	C	T	C	427	16	8	221	497	381	277	157	41.3[23.5-72.5]	1.04[0.42-2.54]	28.8[16.8-49.3]	Positive	0.30[0.10799-0.49606]	0.00228139	1
2	196043402	rs16837881	EIRA	non-risk	C	T	C	371	118	49	144	665	405	287	132	7.00[5.21-9.40]	1.08[0.73-1.59]	5.26[4.12-6.71]	Positive	0.23[0.04216-0.42964]	0.0170085	1	2	196043402	rs16837881	NARAC	non-risk	C	T	C	458	16	8	190	552	400	222	138	43.0[24.2-76.3]	1.18[0.48-2.89]	31.1[18.2-53.1]	Positive	0.27[0.05682-0.48872]	0.0132969	1
14	38104006	rs177848	EIRA	risk	C	A	A	98	29	137	428	152	110	810	423	6.52[4.23-10.0]	1.07[0.68-1.70]	4.75[2.93-7.71]	Positive	0.25[0.04613-0.47111]	0.0170512	1	14	38104006	rs177848	NARAC	risk	C	A	C	214	7	17	434	222	196	552	342	43.7[19.7-97.1]	1.34[0.53-3.40]	31.5[14.0-71.1]	Positive	0.27[0.06953-0.47115]	0.00832161	1
2	196040970	rs13385777	EIRA	non-risk	T	G	T	371	118	49	144	665	405	287	132	7.00[5.21-9.40]	1.08[0.73-1.59]	5.26[4.12-6.72]	Positive	0.23[0.04193-0.42950]	0.017118	1	2	196040970	rs13385777	NARAC	non-risk	T	G	T	458	16	8	190	552	400	222	138	43.0[24.2-76.3]	1.18[0.48-2.89]	31.1[18.2-53.1]	Positive	0.27[0.05682-0.48872]	0.0132969	1
2	196042596	rs13392639	EIRA	non-risk	T	G	T	356	116	48	143	654	400	282	131	6.75[5.01-9.09]	1.04[0.70-1.54]	5.10[3.99-6.53]	Positive	0.23[0.04199-0.43179]	0.0172052	1	2	196042596	rs13392639	NARAC	non-risk	T	G	T	458	16	8	190	552	400	222	138	43.0[24.2-76.3]	1.18[0.48-2.89]	31.1[18.2-53.1]	Positive	0.27[0.05682-0.48872]	0.0132969	1
5	179002092	rs56198018	EIRA	non-risk	A	G	G	69	21	143	439	123	91	815	431	6.22[3.76-10.3]	1.04[0.62-1.77]	4.44[2.53-7.78]	Positive	0.27[0.04914-0.50620]	0.0172436	1	5	179002092	rs56198018	NARAC	risk	A	G	A	258	9	15	390	282	237	492	301	38.4[18.9-77.7]	1.09[0.46-2.60]	28.2[13.8-57.5]	Positive	0.26[0.06804-0.45745]	0.00816875	1
14	39949353	rs12896502	EIRA	non-risk	T	A	T	350	104	63	178	634	384	343	158	7.42[5.55-9.93]	1.17[0.81-1.68]	5.59[4.33-7.21]	Positive	0.22[0.03968-0.40897]	0.0172551	1	14	39949353	rs12896502	NARAC	non-risk	T	A	T	432	12	12	216	489	374	285	164	52.9[28.2-99.4]	1.88[0.80-4.37]	37.2[20.2-68.3]	Positive	0.28[0.08185-0.47991]	0.00567268	1
2	196044520	rs13397181	EIRA	non-risk	C	G	C	371	118	50	144	665	405	288	132	7.02[5.23-9.43]	1.10[0.75-1.62]	5.26[4.12-6.72]	Positive	0.23[0.04161-0.42905]	0.0172633	1	2	196044520	rs13397181	NARAC	non-risk	C	G	C	458	16	8	190	552	400	222	138	43.0[24.2-76.3]	1.18[0.48-2.89]	31.1[18.2-53.1]	Positive	0.27[0.05682-0.48872]	0.0132969	1
2	196044448	rs13422281	EIRA	non-risk	G	A	G	371	118	50	144	665	405	288	132	7.02[5.23-9.43]	1.10[0.75-1.62]	5.26[4.12-6.72]	Positive	0.23[0.04161-0.42905]	0.0172633	1	2	196044448	rs13422281	NARAC	non-risk	G	A	G	458	16	8	190	552	400	222	138	43.0[24.2-76.3]	1.18[0.48-2.89]	31.1[18.2-53.1]	Positive	0.27[0.05682-0.48872]	0.0132969	1
2	196030300	rs1511268	EIRA	risk	C	A	C	338	101	68	188	599	371	366	170	7.37[5.52-9.86]	1.22[0.85-1.75]	5.52[4.25-7.15]	Positive	0.22[0.03904-0.40300]	0.0172899	1	2	196030300	rs1511268	NARAC	non-risk	C	A	C	417	13	11	231	491	358	283	180	45.4[24.6-83.6]	1.41[0.60-3.28]	33.3[18.5-60.1]	Positive	0.25[0.05174-0.45977]	0.0140061	1
15	89249738	rs56173746	EIRA	risk	T	C	T	408	126	41	111	726	430	237	101	7.73[5.67-10.5]	1.22[0.81-1.84]	5.57[4.41-7.05]	Positive	0.24[0.04396-0.45485]	0.0173383	1	15	89249738	rs56173746	NARAC	risk	T	C	T	511	18	6	137	571	436	203	102	49.1[28.0-86.0]	1.01[0.38-2.65]	28.4[17.1-47.2]	Positive	0.42[0.23607-0.60633]	8.21997e-06	0.0397731
19	46928574	rs7248571	EIRA	non-risk	T	C	T	165	36	134	350	304	141	651	385	7.90[5.37-11.6]	1.76[1.16-2.67]	10.2[6.75-15.5]	Negative	-0.3[-0.7180--0.0693]	0.0173425	1	19	46928574	rs7248571	NARAC	non-risk	T	C	T	478	11	13	170	572	350	202	188	39.5[20.5-75.8]	3.86[1.64-9.05]	61.8[32.8-116.]	Negative	-0.6[-1.0940--0.1822]	0.00607914	1
14	38169407	rs12435334	EIRA	non-risk	A	C	C	89	27	142	433	142	104	816	427	6.36[4.06-9.96]	1.07[0.67-1.72]	4.61[2.79-7.61]	Positive	0.26[0.04644-0.48093]	0.0173584	1	14	38169407	rs12435334	NARAC	risk	A	C	A	221	6	18	427	223	198	551	340	53.7[22.8-125.]	1.79[0.68-4.72]	38.8[16.3-92.3]	Positive	0.26[0.06012-0.46350]	0.0109499	1
14	39943541	rs2057137	EIRA	non-risk	G	A	G	351	104	63	178	634	384	343	158	7.45[5.57-9.96]	1.17[0.81-1.69]	5.60[4.34-7.23]	Positive	0.22[0.03921-0.40861]	0.0174947	1	14	39943541	rs2057137	NARAC	non-risk	G	A	G	432	12	12	216	489	374	285	164	52.9[28.2-99.4]	1.88[0.80-4.37]	37.2[20.2-68.3]	Positive	0.28[0.08185-0.47991]	0.00567268	1
18	43234800	rs9304318	EIRA	risk	G	A	G	395	125	46	137	686	410	293	133	7.10[5.31-9.48]	1.06[0.71-1.57]	5.37[4.23-6.81]	Positive	0.23[0.04098-0.42776]	0.0175308	1	18	43234800	rs9304318	NARAC	risk	G	A	G	451	14	10	197	528	396	246	142	47.9[26.4-87.1]	1.77[0.75-4.18]	36.1[20.4-63.6]	Positive	0.23[0.01136-0.45100]	0.0392747	1
11	79851863	rs12575918	EIRA	non-risk	G	A	G	375	115	53	143	697	414	258	112	7.69[5.66-10.4]	1.22[0.83-1.79]	5.60[4.39-7.15]	Positive	0.24[0.04213-0.44083]	0.0175838	1	11	79851863	rs12575918	NARAC	non-risk	G	A	A	501	18	6	147	573	408	201	130	40.6[23.4-70.4]	1.06[0.40-2.82]	30.3[18.2-50.3]	Positive	0.25[0.02546-0.47846]	0.0292291	1
2	196061068	rs6434755	EIRA	non-risk	T	A	T	397	123	38	111	714	429	220	98	7.44[5.43-10.2]	1.11[0.73-1.70]	5.44[4.29-6.90]	Positive	0.25[0.04421-0.46260]	0.0175857	1	2	196061068	rs6434755	NARAC	non-risk	T	A	T	501	17	7	147	600	430	174	108	46.5[26.1-82.8]	1.46[0.58-3.71]	33.0[19.6-55.6]	Positive	0.27[0.04840-0.51005]	0.0177377	1
2	196061859	rs6434757	EIRA	non-risk	A	G	A	397	123	38	111	714	429	220	98	7.44[5.43-10.2]	1.11[0.73-1.70]	5.44[4.29-6.90]	Positive	0.25[0.04421-0.46260]	0.0175857	1	2	196061859	rs6434757	NARAC	non-risk	A	G	A	501	17	7	147	600	430	174	108	46.5[26.1-82.8]	1.46[0.58-3.71]	33.0[19.6-55.6]	Positive	0.27[0.04840-0.51005]	0.0177377	1
16	60338715	rs7203419	EIRA	non-risk	C	T	C	228	68	100	302	393	253	572	285	6.63[4.88-9.02]	1.05[0.74-1.50]	5.17[3.77-7.08]	Positive	0.21[0.03705-0.38820]	0.0176144	1	16	60338715	rs7203419	NARAC	non-risk	C	T	C	303	9	15	345	339	271	435	267	39.3[19.4-79.3]	1.14[0.48-2.71]	30.1[14.9-61.0]	Positive	0.22[0.03016-0.42770]	0.023982	1
2	196006356	rs10192714	EIRA	non-risk	G	A	G	371	119	50	144	666	405	288	132	6.96[5.18-9.34]	1.09[0.74-1.60]	5.23[4.10-6.66]	Positive	0.23[0.04083-0.42871]	0.0176612	1	2	196006356	rs10192714	NARAC	non-risk	G	A	G	461	16	8	187	554	401	220	137	42.6[24.0-75.7]	1.20[0.49-2.94]	31.4[18.3-53.6]	Positive	0.25[0.03908-0.47898]	0.020982	1
14	38099460	rs177835	EIRA	risk	A	G	G	97	29	139	434	153	110	818	426	6.49[4.21-10.0]	1.06[0.67-1.69]	4.75[2.93-7.71]	Positive	0.25[0.04479-0.47040]	0.0176658	1	14	38099460	rs177835	NARAC	risk	A	G	A	214	7	17	434	222	196	552	342	43.7[19.7-97.1]	1.34[0.53-3.40]	31.5[14.0-71.1]	Positive	0.27[0.06953-0.47115]	0.00832161	1
16	60350846	rs1465892	EIRA	non-risk	C	T	C	228	69	98	302	396	254	571	285	6.54[4.82-8.89]	1.02[0.71-1.46]	5.13[3.75-7.01]	Positive	0.21[0.03693-0.38879]	0.0177188	1	16	60350846	rs1465892	NARAC	non-risk	C	T	C	300	9	15	348	335	267	439	271	38.6[19.1-78.1]	1.12[0.47-2.67]	30.0[14.8-60.8]	Positive	0.21[0.01763-0.42066]	0.0330447	1
2	144668249	rs787176	EIRA	non-risk	C	T	C	241	72	90	267	413	260	524	256	7.02[5.17-9.53]	1.13[0.79-1.62]	5.38[3.95-7.32]	Positive	0.21[0.03712-0.39107]	0.0177325	1	2	144668249	rs787176	NARAC	non-risk	C	T	C	293	9	15	355	343	268	431	270	42.1[20.8-85.1]	1.23[0.52-2.93]	30.8[15.2-62.4]	Positive	0.26[0.06993-0.45398]	0.00749838	1
9	109797799	rs1355281	EIRA	non-risk	G	C	G	306	94	77	226	554	269	416	272	5.05[3.82-6.67]	1.09[0.77-1.55]	6.77[5.14-8.90]	Negative	-0.3[-0.6563--0.0622]	0.017754	1	9	109797799	rs1355281	NARAC	non-risk	G	C	G	330	9	15	318	425	260	349	278	36.8[18.2-74.4]	1.69[0.71-4.01]	49.6[24.6-100.]	Negative	-0.3[-0.7178--0.0116]	0.0428958	1
3	171218806	rs6445001	EIRA	risk	C	T	C	298	91	71	204	514	326	419	200	6.90[5.16-9.23]	1.13[0.79-1.62]	5.27[4.00-6.93]	Positive	0.21[0.03738-0.39636]	0.0178718	1	3	171218806	rs6445001	NARAC	risk	C	T	C	397	13	11	251	436	325	338	213	40.5[22.2-74.0]	1.21[0.52-2.81]	31.2[17.3-56.5]	Positive	0.22[0.01770-0.42887]	0.0332673	1
2	196038927	rs7558653	EIRA	risk	T	C	T	326	101	70	201	578	357	393	185	7.01[5.27-9.33]	1.14[0.80-1.62]	5.34[4.11-6.95]	Positive	0.21[0.03727-0.39743]	0.017994	1	2	196038927	rs7558653	NARAC	non-risk	T	C	T	405	13	11	243	469	345	305	193	45.1[24.5-82.9]	1.30[0.56-3.04]	31.6[17.5-57.2]	Positive	0.29[0.09804-0.48297]	0.00309236	1
14	39936161	rs11847057	EIRA	non-risk	G	A	G	351	104	63	177	634	384	343	158	7.45[5.57-9.96]	1.18[0.82-1.70]	5.60[4.34-7.23]	Positive	0.22[0.03810-0.40792]	0.0180825	1	14	39936161	rs11847057	NARAC	non-risk	G	A	G	432	12	12	216	489	374	285	164	52.9[28.2-99.4]	1.88[0.80-4.37]	37.2[20.2-68.3]	Positive	0.28[0.08185-0.47991]	0.00567268	1
7	123956031	rs73232002	EIRA	risk	C	T	C	424	134	30	91	746	437	191	84	7.52[5.43-10.4]	1.04[0.65-1.65]	5.49[4.36-6.90]	Positive	0.26[0.04507-0.48394]	0.0181463	1	7	123956031	rs73232002	NARAC	non-risk	C	T	C	486	14	10	162	589	431	185	107	62.9[33.9-116.]	2.39[1.01-5.65]	38.5[21.9-67.8]	Positive	0.36[0.16457-0.56558]	0.00035858	0.574424
15	89250133	rs56271552	EIRA	risk	A	G	A	406	126	42	112	719	421	240	101	7.78[5.71-10.5]	1.23[0.81-1.85]	5.62[4.44-7.11]	Positive	0.24[0.04215-0.45330]	0.0181833	1	15	89250133	rs56271552	NARAC	risk	A	G	A	511	18	6	137	572	437	202	101	48.8[27.9-85.6]	1.01[0.38-2.65]	28.5[17.1-47.3]	Positive	0.41[0.22938-0.60343]	1.27721e-05	0.0409617
10	8118191	rs263418	EIRA	risk	G	A	G	380	118	50	142	672	404	289	131	7.22[5.38-9.68]	1.11[0.76-1.64]	5.41[4.25-6.89]	Positive	0.23[0.03966-0.42802]	0.0182551	1	10	8118191	rs263418	NARAC	non-risk	G	A	G	481	15	9	167	558	403	216	135	50.6[28.1-91.1]	1.86[0.77-4.48]	35.5[20.5-61.5]	Positive	0.28[0.06713-0.49425]	0.00999183	1
5	142671661	rs11750172	EIRA	non-risk	G	C	C	502	157	10	27	906	522	53	18	9.75[5.54-17.1]	1.17[0.55-2.48]	5.62[4.55-6.94]	Positive	0.40[0.06870-0.74204]	0.0182756	1	5	142671661	rs11750172	NARAC	non-risk	G	C	G	409	15	9	239	470	361	304	177	38.3[21.5-68.1]	1.01[0.42-2.40]	29.1[16.6-50.9]	Positive	0.23[0.03168-0.44533]	0.0238039	1
19	46927724	rs2020984	EIRA	non-risk	G	A	G	167	36	132	346	305	141	647	381	8.01[5.46-11.7]	1.77[1.17-2.68]	10.3[6.84-15.7]	Negative	-0.3[-0.7130--0.0659]	0.0183112	1	19	46927724	rs2020984	NARAC	non-risk	G	A	G	478	11	13	170	572	350	202	188	39.5[20.5-75.8]	3.86[1.64-9.05]	61.8[32.8-116.]	Negative	-0.6[-1.0940--0.1822]	0.00607914	1
18	75333862	rs7235506	EIRA	risk	G	C	C	62	15	150	462	82	66	873	467	7.74[4.35-13.7]	1.31[0.72-2.38]	5.15[2.68-9.89]	Positive	0.29[0.04943-0.53760]	0.0184267	1	18	75333862	rs7235506	NARAC	risk	G	C	G	297	9	15	351	326	269	448	269	46.2[22.8-93.5]	1.49[0.62-3.54]	34.6[17.1-70.3]	Positive	0.23[0.04103-0.43690]	0.0179665	1
14	84151832	rs8010294	EIRA	non-risk	G	C	G	142	46	122	385	256	169	720	371	6.25[4.36-8.95]	1.00[0.68-1.49]	4.81[3.26-7.10]	Positive	0.22[0.03830-0.41882]	0.0185419	1	14	84151832	rs8010294	NARAC	non-risk	G	C	G	451	16	8	197	554	394	220	144	43.3[24.4-77.0]	1.33[0.54-3.24]	32.5[19.0-55.7]	Positive	0.24[0.01987-0.46360]	0.0327175	1
5	57057969	rs4518340	EIRA	risk	G	C	C	388	120	41	120	682	407	253	113	7.32[5.40-9.93]	1.07[0.70-1.61]	5.48[4.31-6.97]	Positive	0.24[0.04055-0.44346]	0.0185468	1	5	57057969	rs4518340	NARAC	risk	G	C	C	509	16	8	139	570	431	204	107	49.3[27.5-88.1]	2.11[0.86-5.17]	36.5[21.4-62.4]	Positive	0.23[0.00181-0.46951]	0.0482403	1
2	196001701	rs777740	EIRA	risk	G	A	G	342	103	68	188	606	373	369	171	7.33[5.50-9.78]	1.21[0.85-1.73]	5.51[4.25-7.13]	Positive	0.21[0.03661-0.40063]	0.0185561	1	2	196001701	rs777740	NARAC	non-risk	G	A	G	421	13	11	227	493	359	281	179	45.3[24.6-83.6]	1.45[0.62-3.38]	33.9[18.8-61.1]	Positive	0.24[0.03551-0.45017]	0.021691	1
14	39937161	rs1950329	EIRA	non-risk	A	G	A	348	104	62	175	633	383	340	157	7.36[5.50-9.85]	1.16[0.80-1.68]	5.55[4.31-7.16]	Positive	0.22[0.03722-0.40851]	0.0186239	1	14	39937161	rs1950329	NARAC	non-risk	A	G	A	432	12	12	216	489	374	285	164	52.9[28.2-99.4]	1.88[0.80-4.37]	37.2[20.2-68.3]	Positive	0.28[0.08185-0.47991]	0.00567268	1
5	142705895	rs10482655	EIRA	non-risk	G	T	T	503	158	10	27	908	522	53	18	9.70[5.51-17.0]	1.17[0.55-2.47]	5.60[4.54-6.92]	Positive	0.40[0.06742-0.74166]	0.0186727	1	5	142705895	rs10482655	NARAC	non-risk	G	T	G	409	15	9	239	471	360	303	178	37.6[21.1-66.8]	1.01[0.42-2.40]	29.4[16.8-51.4]	Positive	0.21[0.00430-0.42945]	0.0455371	1
7	40887706	rs10237052	EIRA	risk	T	C	T	336	100	69	195	571	351	401	188	7.35[5.53-9.78]	1.20[0.84-1.71]	5.57[4.29-7.24]	Positive	0.21[0.03573-0.39312]	0.0186758	1	7	40887706	rs10237052	NARAC	non-risk	T	C	T	407	15	9	241	474	350	300	188	40.3[22.6-71.5]	1.15[0.48-2.75]	30.5[17.5-53.2]	Positive	0.23[0.03263-0.44400]	0.0231483	1
7	40887411	rs28621645	EIRA	risk	G	A	G	336	100	69	195	571	351	401	188	7.35[5.53-9.78]	1.20[0.84-1.71]	5.57[4.29-7.24]	Positive	0.21[0.03573-0.39312]	0.0186758	1	7	40887411	rs28621645	NARAC	non-risk	G	A	G	407	15	9	241	474	350	300	188	40.3[22.6-71.5]	1.15[0.48-2.75]	30.5[17.5-53.2]	Positive	0.23[0.03263-0.44400]	0.0231483	1
7	40889040	rs6963162	EIRA	risk	A	G	A	336	100	69	195	571	351	401	188	7.35[5.53-9.78]	1.20[0.84-1.71]	5.57[4.29-7.24]	Positive	0.21[0.03573-0.39312]	0.0186758	1	7	40889040	rs6963162	NARAC	non-risk	A	G	A	407	15	9	241	474	349	300	189	40.2[22.6-71.4]	1.15[0.48-2.75]	30.5[17.5-53.3]	Positive	0.23[0.02952-0.44213]	0.025055	1
2	196046004	rs16837931	EIRA	non-risk	G	A	G	401	128	39	112	724	436	227	101	7.20[5.28-9.82]	1.10[0.72-1.67]	5.30[4.19-6.69]	Positive	0.24[0.04159-0.45767]	0.0186778	1	2	196046004	rs16837931	NARAC	non-risk	G	A	G	502	17	7	146	597	425	177	113	45.5[25.6-80.9]	1.42[0.56-3.59]	32.8[19.5-55.2]	Positive	0.26[0.03652-0.50187]	0.0233491	1
13	65195410	rs9571246	EIRA	non-risk	G	T	T	498	151	20	35	913	486	66	58	3.77[2.53-5.62]	1.87[1.04-3.36]	6.30[5.08-7.81]	Negative	-0.9[-1.6545--0.1500]	0.0187282	1	13	65195410	rs9571246	NARAC	non-risk	G	T	G	319	11	13	329	403	244	371	294	28.7[15.1-54.7]	1.16[0.50-2.71]	42.5[22.2-81.3]	Negative	-0.4[-0.8743--0.0968]	0.0143423	1
4	14245558	rs10025267	EIRA	risk	C	A	A	410	126	45	119	732	433	237	101	7.63[5.60-10.3]	1.19[0.80-1.78]	5.55[4.39-7.01]	Positive	0.24[0.04073-0.45172]	0.0188504	1	4	14245558	rs10025267	NARAC	non-risk	C	A	A	474	14	10	174	585	423	189	115	50.9[27.6-93.6]	1.84[0.78-4.35]	36.8[20.9-64.8]	Positive	0.26[0.02894-0.49244]	0.0274679	1
18	75334321	rs9963096	EIRA	risk	A	G	G	62	15	151	463	82	66	873	467	7.74[4.35-13.7]	1.32[0.73-2.40]	5.15[2.68-9.89]	Positive	0.29[0.04835-0.53666]	0.0188667	1	18	75334321	rs9963096	NARAC	risk	A	G	A	297	9	15	351	325	269	449	269	46.2[22.8-93.5]	1.49[0.62-3.54]	34.6[17.0-70.2]	Positive	0.23[0.04222-0.43764]	0.0173771	1
19	46927965	rs1109234	EIRA	non-risk	T	A	T	166	36	134	348	304	141	652	383	8.00[5.44-11.7]	1.78[1.18-2.70]	10.3[6.79-15.6]	Negative	-0.3[-0.7083--0.0636]	0.018937	1	19	46927965	rs1109234	NARAC	non-risk	T	A	T	478	11	13	170	572	350	202	188	39.5[20.5-75.8]	3.86[1.64-9.05]	61.8[32.8-116.]	Negative	-0.6[-1.0940--0.1822]	0.00607914	1
2	196040865	rs13398975	EIRA	non-risk	G	T	G	371	118	50	144	665	405	287	132	7.00[5.21-9.40]	1.10[0.75-1.62]	5.26[4.12-6.71]	Positive	0.23[0.03830-0.42719]	0.0189693	1	2	196040865	rs13398975	NARAC	non-risk	G	T	G	458	16	8	190	552	400	222	138	43.0[24.2-76.3]	1.18[0.48-2.89]	31.1[18.2-53.1]	Positive	0.27[0.05682-0.48872]	0.0132969	1
2	196042869	rs16837873	EIRA	non-risk	C	T	C	371	118	50	144	665	405	287	132	7.00[5.21-9.40]	1.10[0.75-1.62]	5.26[4.12-6.71]	Positive	0.23[0.03830-0.42718]	0.0189715	1	2	196042869	rs16837873	NARAC	non-risk	C	T	C	458	16	8	190	552	400	222	138	43.0[24.2-76.3]	1.18[0.48-2.89]	31.1[18.2-53.1]	Positive	0.27[0.05682-0.48872]	0.0132969	1
2	196043045	rs16837877	EIRA	non-risk	A	C	A	371	118	50	144	665	405	287	132	7.00[5.21-9.40]	1.10[0.75-1.62]	5.26[4.12-6.71]	Positive	0.23[0.03830-0.42718]	0.0189715	1	2	196043045	rs16837877	NARAC	non-risk	A	C	A	458	16	8	190	552	400	222	138	43.0[24.2-76.3]	1.18[0.48-2.89]	31.1[18.2-53.1]	Positive	0.27[0.05682-0.48872]	0.0132969	1
2	196043589	rs16837882	EIRA	non-risk	G	A	G	371	118	50	144	665	405	287	132	7.00[5.21-9.40]	1.10[0.75-1.62]	5.26[4.12-6.71]	Positive	0.23[0.03830-0.42718]	0.0189715	1	2	196043589	rs16837882	NARAC	non-risk	G	A	G	458	16	8	190	552	400	222	138	43.0[24.2-76.3]	1.18[0.48-2.89]	31.1[18.2-53.1]	Positive	0.27[0.05682-0.48872]	0.0132969	1
2	196044134	rs16837890	EIRA	non-risk	G	A	G	371	118	50	144	665	405	287	132	7.00[5.21-9.40]	1.10[0.75-1.62]	5.26[4.12-6.71]	Positive	0.23[0.03830-0.42718]	0.0189715	1	2	196044134	rs16837890	NARAC	non-risk	G	A	G	458	16	8	190	552	400	222	138	43.0[24.2-76.3]	1.18[0.48-2.89]	31.1[18.2-53.1]	Positive	0.27[0.05682-0.48872]	0.0132969	1
2	196043659	rs57334499	EIRA	non-risk	T	C	T	371	118	50	144	665	405	287	132	7.00[5.21-9.40]	1.10[0.75-1.62]	5.26[4.12-6.71]	Positive	0.23[0.03830-0.42718]	0.0189715	1	2	196043659	rs57334499	NARAC	non-risk	T	C	T	458	16	8	190	552	400	222	138	43.0[24.2-76.3]	1.18[0.48-2.89]	31.1[18.2-53.1]	Positive	0.27[0.05682-0.48872]	0.0132969	1
2	196043173	rs59584601	EIRA	non-risk	G	A	G	371	118	50	144	665	405	287	132	7.00[5.21-9.40]	1.10[0.75-1.62]	5.26[4.12-6.71]	Positive	0.23[0.03830-0.42718]	0.0189715	1	2	196043173	rs59584601	NARAC	non-risk	G	A	G	458	16	8	190	552	400	222	138	43.0[24.2-76.3]	1.18[0.48-2.89]	31.1[18.2-53.1]	Positive	0.27[0.05682-0.48872]	0.0132969	1
14	84152342	rs10147419	EIRA	non-risk	G	A	G	142	46	122	383	253	167	719	370	6.26[4.37-8.98]	1.01[0.68-1.50]	4.82[3.26-7.11]	Positive	0.22[0.03756-0.41938]	0.0189914	1	14	84152342	rs10147419	NARAC	non-risk	G	A	G	451	16	8	197	554	394	220	144	43.3[24.4-77.0]	1.33[0.54-3.24]	32.5[19.0-55.7]	Positive	0.24[0.01987-0.46360]	0.0327175	1
2	71807096	rs10176282	EIRA	non-risk	G	A	A	116	38	131	395	215	146	720	377	5.97[4.05-8.82]	1.01[0.67-1.54]	4.53[2.96-6.93]	Positive	0.23[0.03906-0.43758]	0.0190653	1	2	71807096	rs10176282	NARAC	risk	G	A	G	204	6	18	444	211	177	563	361	38.6[16.5-90.2]	1.14[0.43-3.00]	28.8[12.1-68.4]	Positive	0.25[0.04067-0.46048]	0.0192961	1
2	196041108	rs13399289	EIRA	non-risk	A	T	A	372	118	49	143	664	405	286	132	7.00[5.21-9.40]	1.09[0.74-1.61]	5.27[4.13-6.73]	Positive	0.23[0.03815-0.42743]	0.0190698	1	2	196041108	rs13399289	NARAC	non-risk	A	T	A	458	16	8	190	552	400	222	138	43.0[24.2-76.3]	1.18[0.48-2.89]	31.1[18.2-53.1]	Positive	0.27[0.05682-0.48872]	0.0132969	1
2	196017570	rs12463457	EIRA	non-risk	G	A	G	371	119	50	144	666	405	287	132	6.94[5.17-9.31]	1.09[0.74-1.60]	5.22[4.10-6.66]	Positive	0.23[0.03806-0.42717]	0.0191054	1	2	196017570	rs12463457	NARAC	non-risk	G	A	G	459	16	8	189	553	400	221	138	42.3[23.8-75.2]	1.18[0.48-2.89]	31.2[18.3-53.3]	Positive	0.25[0.03785-0.47824]	0.0216237	1
2	196015973	rs12474423	EIRA	non-risk	C	T	C	371	119	50	144	666	405	287	132	6.94[5.17-9.31]	1.09[0.74-1.60]	5.22[4.10-6.66]	Positive	0.23[0.03806-0.42717]	0.0191054	1	2	196015973	rs12474423	NARAC	non-risk	C	T	C	459	16	8	189	553	400	221	138	42.3[23.8-75.2]	1.18[0.48-2.89]	31.2[18.3-53.3]	Positive	0.25[0.03785-0.47824]	0.0216237	1
2	196041207	rs6716257	EIRA	risk	C	T	C	327	101	70	200	578	357	393	185	7.04[5.29-9.37]	1.15[0.81-1.64]	5.37[4.13-6.98]	Positive	0.21[0.03519-0.39598]	0.0191584	1	2	196041207	rs6716257	NARAC	non-risk	C	T	C	405	13	11	243	469	345	305	193	45.1[24.5-82.9]	1.30[0.56-3.04]	31.6[17.5-57.2]	Positive	0.29[0.09804-0.48297]	0.00309236	1
3	872667	rs4686213	EIRA	non-risk	T	C	C	59	18	153	474	79	61	900	483	6.24[3.63-10.7]	1.06[0.60-1.86]	4.25[2.26-7.97]	Positive	0.30[0.05044-0.56752]	0.0191611	1	3	872667	rs4686213	NARAC	risk	T	C	T	351	11	13	297	369	286	405	252	45.3[23.8-86.3]	1.57[0.67-3.65]	35.3[18.6-67.2]	Positive	0.20[0.00112-0.41257]	0.0487511	1
1	20947161	rs28709450	EIRA	non-risk	A	G	G	450	146	21	53	856	451	89	75	3.67[2.55-5.27]	1.25[0.73-2.15]	5.99[4.80-7.47]	Negative	-0.7[-1.2876--0.1142]	0.019194	1	1	20947161	rs28709450	NARAC	risk	A	G	A	326	12	12	322	440	271	334	267	25.7[13.8-48.0]	1.01[0.43-2.34]	39.4[21.2-73.4]	Negative	-0.5[-0.9342--0.1291]	0.00963014	1
5	142679152	rs62375499	EIRA	non-risk	C	G	G	502	157	10	27	909	522	53	18	9.75[5.54-17.1]	1.17[0.55-2.48]	5.64[4.57-6.96]	Positive	0.40[0.06565-0.74109]	0.0192295	1	5	142679152	rs62375499	NARAC	non-risk	C	G	C	409	15	9	239	471	362	303	176	38.2[21.5-68.0]	1.01[0.42-2.40]	29.1[16.7-50.9]	Positive	0.23[0.03017-0.44492]	0.0247557	1
9	120521132	rs10983776	EIRA	risk	T	C	C	89	28	141	433	145	105	812	431	6.23[4.00-9.72]	1.06[0.66-1.69]	4.55[2.77-7.48]	Positive	0.25[0.04213-0.47645]	0.0192705	1	9	120521132	rs10983776	NARAC	non-risk	T	C	T	191	6	18	457	232	183	542	355	41.3[17.6-97.0]	1.26[0.48-3.32]	32.0[13.4-76.0]	Positive	0.22[0.00542-0.43466]	0.0444766	1
9	120521096	rs4442212	EIRA	risk	T	C	C	89	28	141	433	145	105	812	431	6.23[4.00-9.72]	1.06[0.66-1.69]	4.55[2.77-7.48]	Positive	0.25[0.04213-0.47645]	0.0192705	1	9	120521096	rs4442212	NARAC	non-risk	T	C	T	191	6	18	457	232	183	542	355	41.3[17.6-97.0]	1.26[0.48-3.32]	32.0[13.4-76.0]	Positive	0.22[0.00542-0.43466]	0.0444766	1
1	181311026	rs59292540	EIRA	risk	A	G	A	427	136	31	93	735	435	204	89	7.38[5.37-10.1]	1.06[0.67-1.66]	5.42[4.31-6.82]	Positive	0.25[0.04164-0.47223]	0.0193264	1	1	181311026	rs59292540	NARAC	non-risk	A	G	A	539	18	6	109	649	472	125	66	47.6[26.3-86.0]	1.38[0.51-3.69]	32.6[19.7-53.9]	Positive	0.30[0.04976-0.56482]	0.0193475	1
10	8120143	rs477461	EIRA	non-risk	G	A	G	386	120	51	147	683	409	296	135	7.17[5.36-9.58]	1.09[0.75-1.60]	5.42[4.26-6.89]	Positive	0.22[0.03715-0.42269]	0.0194004	1	10	8120143	rs477461	NARAC	non-risk	G	A	G	481	15	9	167	558	403	216	135	50.6[28.1-91.1]	1.86[0.77-4.48]	35.5[20.5-61.5]	Positive	0.28[0.06713-0.49425]	0.00999183	1
2	196043785	rs72915847	EIRA	non-risk	C	T	C	371	118	49	142	665	406	274	126	6.99[5.18-9.42]	1.09[0.74-1.61]	5.25[4.11-6.69]	Positive	0.23[0.03778-0.43209]	0.0195088	1	2	196043785	rs72915847	NARAC	non-risk	C	T	C	462	16	8	186	554	403	220	135	43.9[24.7-77.9]	1.22[0.49-2.99]	31.3[18.3-53.5]	Positive	0.28[0.06585-0.49554]	0.0104423	1
2	196087446	rs1858299	EIRA	non-risk	A	C	A	315	93	68	203	556	346	384	184	7.18[5.36-9.61]	1.12[0.78-1.61]	5.49[4.19-7.19]	Positive	0.21[0.03492-0.39967]	0.0195245	1	2	196087446	rs1858299	NARAC	non-risk	A	C	A	400	13	11	248	472	350	302	188	45.1[24.5-83.1]	1.31[0.56-3.05]	31.7[17.6-57.3]	Positive	0.28[0.09610-0.48274]	0.00334201	1
2	196032891	rs34504189	EIRA	risk	T	G	T	326	101	70	201	578	357	392	185	6.99[5.25-9.31]	1.14[0.80-1.62]	5.34[4.11-6.95]	Positive	0.21[0.03455-0.39580]	0.0195468	1	2	196032891	rs34504189	NARAC	non-risk	T	G	T	405	13	11	243	469	345	305	193	45.1[24.5-82.9]	1.30[0.56-3.04]	31.6[17.5-57.2]	Positive	0.29[0.09804-0.48297]	0.00309236	1
2	196005711	rs12615910	EIRA	risk	T	C	T	326	101	70	201	578	357	392	185	6.99[5.25-9.31]	1.14[0.80-1.62]	5.34[4.11-6.95]	Positive	0.21[0.03450-0.39577]	0.0195759	1	2	196005711	rs12615910	NARAC	non-risk	T	C	T	408	13	11	240	471	346	303	192	44.9[24.4-82.5]	1.32[0.57-3.09]	32.0[17.7-57.8]	Positive	0.27[0.08328-0.47421]	0.00518745	1
14	38124506	rs177869	EIRA	risk	A	G	G	93	29	137	432	147	107	809	428	6.13[3.96-9.47]	1.01[0.63-1.60]	4.52[2.77-7.37]	Positive	0.25[0.04152-0.47786]	0.0196432	1	14	38124506	rs177869	NARAC	non-risk	A	G	A	221	7	17	427	226	200	548	338	45.3[20.4-100.]	1.41[0.56-3.55]	32.4[14.4-72.8]	Positive	0.27[0.07759-0.47412]	0.00639078	1
18	23271286	rs12955389	EIRA	non-risk	T	C	T	228	67	98	296	419	270	529	267	7.05[5.15-9.64]	1.16[0.81-1.66]	5.42[3.95-7.42]	Positive	0.20[0.03314-0.38226]	0.0196891	1	18	23271286	rs12955389	NARAC	non-risk	T	C	T	265	8	16	383	282	227	492	311	43.2[20.6-90.6]	1.35[0.55-3.30]	32.7[15.4-69.0]	Positive	0.23[0.03653-0.43605]	0.0204244	1
2	196042536	rs13390032	EIRA	non-risk	C	G	C	371	118	50	144	664	405	286	132	6.98[5.19-9.37]	1.10[0.75-1.62]	5.25[4.12-6.70]	Positive	0.23[0.03696-0.42656]	0.0197038	1	2	196042536	rs13390032	NARAC	non-risk	C	G	C	458	16	8	190	552	400	222	138	43.0[24.2-76.3]	1.18[0.48-2.89]	31.1[18.2-53.1]	Positive	0.27[0.05682-0.48872]	0.0132969	1
2	196042372	rs13403110	EIRA	non-risk	A	T	A	371	118	50	144	664	405	286	132	6.98[5.19-9.37]	1.10[0.75-1.62]	5.25[4.12-6.70]	Positive	0.23[0.03696-0.42656]	0.0197038	1	2	196042372	rs13403110	NARAC	non-risk	A	T	A	458	16	8	190	552	400	222	138	43.0[24.2-76.3]	1.18[0.48-2.89]	31.1[18.2-53.1]	Positive	0.27[0.05682-0.48872]	0.0132969	1
14	39954583	rs7158709	EIRA	non-risk	T	A	T	350	103	63	178	631	381	343	158	7.50[5.60-10.0]	1.18[0.82-1.70]	5.66[4.38-7.31]	Positive	0.22[0.03512-0.40611]	0.0197478	1	14	39954583	rs7158709	NARAC	non-risk	T	A	T	432	12	12	216	489	374	285	164	52.9[28.2-99.4]	1.88[0.80-4.37]	37.2[20.2-68.3]	Positive	0.28[0.08185-0.47991]	0.00567268	1
7	40891684	rs10231596	EIRA	risk	T	C	T	336	100	69	195	571	351	400	188	7.33[5.51-9.76]	1.20[0.84-1.71]	5.57[4.29-7.24]	Positive	0.21[0.03329-0.39167]	0.0201153	1	7	40891684	rs10231596	NARAC	non-risk	T	C	T	407	15	9	241	474	349	300	189	40.2[22.6-71.4]	1.15[0.48-2.75]	30.5[17.5-53.3]	Positive	0.23[0.02952-0.44213]	0.025055	1
7	40891812	rs6957123	EIRA	risk	G	T	G	336	100	69	195	571	351	400	188	7.33[5.51-9.76]	1.20[0.84-1.71]	5.57[4.29-7.24]	Positive	0.21[0.03329-0.39167]	0.0201153	1	7	40891812	rs6957123	NARAC	non-risk	G	T	G	407	15	9	241	474	349	300	189	40.2[22.6-71.4]	1.15[0.48-2.75]	30.5[17.5-53.3]	Positive	0.23[0.02952-0.44213]	0.025055	1
16	60353087	rs993388	EIRA	non-risk	T	C	T	229	69	96	300	397	254	567	284	6.55[4.82-8.90]	1.01[0.70-1.44]	5.16[3.77-7.06]	Positive	0.20[0.03284-0.38653]	0.020123	1	16	60353087	rs993388	NARAC	non-risk	T	C	T	300	9	15	348	335	267	439	271	38.6[19.1-78.1]	1.12[0.47-2.67]	30.0[14.8-60.8]	Positive	0.21[0.01763-0.42066]	0.0330447	1
12	10174884	rs12819440	EIRA	risk	C	A	A	24	7	163	498	37	34	916	495	6.38[2.72-14.9]	1.11[0.46-2.63]	3.85[1.46-10.1]	Positive	0.37[0.05926-0.69969]	0.0201916	1	12	10174884	rs12819440	NARAC	risk	C	A	C	421	15	9	227	423	344	351	194	41.4[23.4-73.2]	1.00[0.41-2.38]	26.8[15.4-46.8]	Positive	0.35[0.17693-0.52524]	7.77481e-05	0.219397
2	196034312	rs1355431	EIRA	non-risk	G	C	G	371	118	50	144	664	405	286	132	6.97[5.19-9.37]	1.10[0.75-1.62]	5.26[4.12-6.71]	Positive	0.23[0.03607-0.42605]	0.0202001	1	2	196034312	rs1355431	NARAC	non-risk	G	C	G	458	16	8	190	552	400	222	138	43.0[24.2-76.3]	1.18[0.48-2.89]	31.1[18.2-53.1]	Positive	0.27[0.05682-0.48872]	0.0132969	1
22	50710349	rs2235356	EIRA	risk	A	G	A	163	47	124	370	265	177	714	367	6.93[4.88-9.84]	1.17[0.79-1.72]	5.24[3.58-7.65]	Positive	0.21[0.03407-0.40485]	0.0203263	1	22	50710349	rs2235356	NARAC	non-risk	A	G	A	426	15	9	222	556	396	218	142	43.5[24.1-78.3]	1.34[0.56-3.18]	32.8[18.9-57.2]	Positive	0.23[0.01724-0.45597]	0.0345076	1
12	10175163	rs56906784	EIRA	risk	C	T	T	24	7	162	498	37	34	914	495	6.38[2.72-14.9]	1.10[0.46-2.62]	3.85[1.46-10.1]	Positive	0.37[0.05872-0.70010]	0.0203986	1	12	10175163	rs56906784	NARAC	risk	C	T	C	421	15	9	227	423	344	351	194	41.4[23.4-73.2]	1.00[0.41-2.38]	26.8[15.4-46.8]	Positive	0.35[0.17693-0.52524]	7.77481e-05	0.219397
14	38173513	rs11156965	EIRA	non-risk	A	G	G	90	27	142	433	143	104	819	428	6.45[4.12-10.0]	1.08[0.67-1.74]	4.70[2.84-7.75]	Positive	0.25[0.03987-0.47554]	0.0204075	1	14	38173513	rs11156965	NARAC	risk	A	G	A	220	6	18	428	224	198	550	340	53.4[22.7-125.]	1.79[0.68-4.71]	39.1[16.4-92.9]	Positive	0.25[0.04932-0.45730]	0.0149339	1
2	196003748	rs930143	EIRA	non-risk	C	T	C	375	119	50	145	672	406	288	132	7.03[5.24-9.44]	1.09[0.74-1.61]	5.31[4.17-6.77]	Positive	0.23[0.03563-0.42505]	0.020408	1	2	196003748	rs930143	NARAC	non-risk	C	T	C	462	16	8	186	554	401	220	137	42.8[24.1-76.0]	1.21[0.49-2.98]	31.5[18.4-53.8]	Positive	0.25[0.03861-0.47869]	0.0212242	1
9	14214688	rs7041043	EIRA	risk	C	G	C	362	105	61	154	627	378	319	141	7.99[5.94-10.7]	1.37[0.95-1.99]	5.82[4.51-7.50]	Positive	0.22[0.03455-0.41447]	0.0205296	1	9	14214688	rs7041043	NARAC	non-risk	C	G	C	396	14	10	252	449	345	325	193	43.1[23.9-77.9]	1.32[0.56-3.11]	31.9[17.9-56.7]	Positive	0.25[0.05631-0.45073]	0.0117464	1
2	196017771	rs10931681	EIRA	risk	T	C	T	326	101	70	201	579	357	392	185	6.99[5.25-9.31]	1.14[0.80-1.62]	5.35[4.12-6.96]	Positive	0.21[0.03284-0.39466]	0.0205649	1	2	196017771	rs10931681	NARAC	non-risk	T	C	T	406	13	11	242	470	345	304	193	44.6[24.2-82.0]	1.31[0.56-3.05]	31.8[17.6-57.5]	Positive	0.27[0.08256-0.47377]	0.005314	1
2	196020514	rs11888184	EIRA	risk	A	G	A	326	101	70	201	579	357	392	185	6.99[5.25-9.31]	1.14[0.80-1.62]	5.35[4.12-6.96]	Positive	0.21[0.03284-0.39466]	0.0205649	1	2	196020514	rs11888184	NARAC	non-risk	A	G	A	408	13	11	240	471	346	303	192	44.9[24.4-82.5]	1.32[0.57-3.09]	32.0[17.7-57.8]	Positive	0.27[0.08328-0.47421]	0.00518745	1
2	196012052	rs2063452	EIRA	risk	G	A	G	326	101	70	201	579	357	392	185	6.99[5.25-9.31]	1.14[0.80-1.62]	5.35[4.12-6.96]	Positive	0.21[0.03284-0.39466]	0.0205649	1	2	196012052	rs2063452	NARAC	non-risk	G	A	G	408	13	11	240	471	346	303	192	44.9[24.4-82.5]	1.32[0.57-3.09]	32.0[17.7-57.8]	Positive	0.27[0.08328-0.47421]	0.00518745	1
2	196013950	rs35606356	EIRA	risk	A	T	A	326	101	70	201	579	357	392	185	6.99[5.25-9.31]	1.14[0.80-1.62]	5.35[4.12-6.96]	Positive	0.21[0.03284-0.39466]	0.0205649	1	2	196013950	rs35606356	NARAC	non-risk	A	T	A	408	13	11	240	471	346	303	192	44.9[24.4-82.5]	1.32[0.57-3.09]	32.0[17.7-57.8]	Positive	0.27[0.08328-0.47421]	0.00518745	1
2	196014263	rs7558137	EIRA	risk	T	C	T	326	101	70	201	579	357	392	185	6.99[5.25-9.31]	1.14[0.80-1.62]	5.35[4.12-6.96]	Positive	0.21[0.03284-0.39466]	0.0205649	1	2	196014263	rs7558137	NARAC	non-risk	T	C	T	408	13	11	240	471	346	303	192	44.9[24.4-82.5]	1.32[0.57-3.09]	32.0[17.7-57.8]	Positive	0.27[0.08328-0.47421]	0.00518745	1
2	196015269	rs7561896	EIRA	risk	T	C	T	326	101	70	201	579	357	392	185	6.99[5.25-9.31]	1.14[0.80-1.62]	5.35[4.12-6.96]	Positive	0.21[0.03284-0.39466]	0.0205649	1	2	196015269	rs7561896	NARAC	non-risk	T	C	T	408	13	11	240	471	346	303	192	44.9[24.4-82.5]	1.32[0.57-3.09]	32.0[17.7-57.8]	Positive	0.27[0.08328-0.47421]	0.00518745	1
2	196007315	rs902154	EIRA	risk	A	G	A	326	101	70	201	579	357	392	185	6.99[5.25-9.31]	1.14[0.80-1.62]	5.35[4.12-6.96]	Positive	0.21[0.03284-0.39466]	0.0205649	1	2	196007315	rs902154	NARAC	non-risk	A	G	A	408	13	11	240	471	346	303	192	44.9[24.4-82.5]	1.32[0.57-3.09]	32.0[17.7-57.8]	Positive	0.27[0.08328-0.47421]	0.00518745	1
14	98895997	rs10129476	EIRA	non-risk	T	A	A	121	36	128	383	212	143	739	374	6.64[4.47-9.84]	1.09[0.71-1.67]	4.98[3.24-7.67]	Positive	0.23[0.03591-0.43185]	0.0205831	1	14	98895997	rs10129476	NARAC	non-risk	A	T	T	496	17	7	152	569	418	205	120	41.0[23.3-71.9]	1.12[0.44-2.84]	30.8[18.3-51.9]	Positive	0.24[0.01296-0.47440]	0.0384362	1
2	196023805	rs1511271	EIRA	risk	A	G	A	337	102	67	187	599	371	363	170	7.22[5.41-9.64]	1.20[0.84-1.72]	5.45[4.21-7.07]	Positive	0.21[0.03319-0.40009]	0.0206329	1	2	196023805	rs1511271	NARAC	non-risk	A	G	A	417	13	11	231	491	358	283	180	45.4[24.6-83.6]	1.41[0.60-3.28]	33.3[18.5-60.1]	Positive	0.25[0.05174-0.45977]	0.0140061	1
2	196045910	rs2375240	EIRA	non-risk	C	T	C	401	128	39	112	724	436	226	101	7.17[5.25-9.78]	1.10[0.72-1.67]	5.30[4.19-6.69]	Positive	0.24[0.03772-0.45565]	0.0206761	1	2	196045910	rs2375240	NARAC	non-risk	C	T	C	502	17	7	146	597	425	177	113	45.5[25.6-80.9]	1.42[0.56-3.59]	32.8[19.5-55.2]	Positive	0.26[0.03652-0.50187]	0.0233491	1
6	116811709	rs4946172	EIRA	risk	C	T	T	64	15	152	447	93	73	844	446	8.03[4.51-14.2]	1.41[0.78-2.56]	5.38[2.83-10.2]	Positive	0.27[0.04243-0.51310]	0.0207003	1	6	116811709	rs4946172	NARAC	non-risk	C	T	C	264	10	14	384	305	240	469	298	37.1[18.9-72.8]	1.08[0.46-2.55]	29.2[14.8-57.8]	Positive	0.20[0.00088-0.41808]	0.0490292	1
1	20947693	rs12729748	EIRA	non-risk	C	A	A	471	150	20	57	869	455	98	81	3.82[2.69-5.41]	1.12[0.65-1.94]	6.13[4.93-7.63]	Negative	-0.6[-1.1818--0.0972]	0.0208055	1	1	20947693	rs12729748	NARAC	risk	C	A	C	326	12	12	322	440	271	334	267	25.7[13.8-48.0]	1.01[0.43-2.34]	39.4[21.2-73.4]	Negative	-0.5[-0.9342--0.1291]	0.00963014	1
2	196018044	rs10497749	EIRA	non-risk	A	T	A	371	119	50	144	666	405	286	132	6.91[5.15-9.28]	1.09[0.74-1.60]	5.22[4.10-6.66]	Positive	0.23[0.03481-0.42535]	0.020916	1	2	196018044	rs10497749	NARAC	non-risk	A	T	A	459	16	8	189	553	400	221	138	42.3[23.8-75.2]	1.18[0.48-2.89]	31.2[18.3-53.3]	Positive	0.25[0.03785-0.47824]	0.0216237	1
14	39944726	rs4899287	EIRA	non-risk	G	C	G	351	104	62	162	637	385	318	144	7.59[5.65-10.2]	1.27[0.88-1.83]	5.62[4.36-7.25]	Positive	0.22[0.03377-0.41391]	0.0209815	1	14	39944726	rs4899287	NARAC	non-risk	G	C	G	432	12	12	216	489	374	285	164	52.9[28.2-99.4]	1.88[0.80-4.37]	37.2[20.2-68.3]	Positive	0.28[0.08185-0.47991]	0.00567268	1
2	196031856	rs10202396	EIRA	non-risk	T	C	T	371	118	50	144	665	405	286	132	6.97[5.19-9.37]	1.10[0.75-1.62]	5.26[4.12-6.71]	Positive	0.22[0.03454-0.42507]	0.0210671	1	2	196031856	rs10202396	NARAC	non-risk	T	C	T	458	16	8	190	552	400	222	138	43.0[24.2-76.3]	1.18[0.48-2.89]	31.1[18.2-53.1]	Positive	0.27[0.05682-0.48872]	0.0132969	1
2	196024739	rs13416830	EIRA	non-risk	G	C	G	371	118	50	144	665	405	286	132	6.97[5.19-9.37]	1.10[0.75-1.62]	5.26[4.12-6.71]	Positive	0.22[0.03454-0.42507]	0.0210671	1	2	196024739	rs13416830	NARAC	non-risk	G	C	G	458	16	8	190	552	400	222	138	43.0[24.2-76.3]	1.18[0.48-2.89]	31.1[18.2-53.1]	Positive	0.27[0.05682-0.48872]	0.0132969	1
2	196028422	rs1511270	EIRA	non-risk	C	G	C	371	118	50	144	665	405	286	132	6.97[5.19-9.37]	1.10[0.75-1.62]	5.26[4.12-6.71]	Positive	0.22[0.03454-0.42507]	0.0210671	1	2	196028422	rs1511270	NARAC	non-risk	C	G	C	458	16	8	190	552	400	222	138	43.0[24.2-76.3]	1.18[0.48-2.89]	31.1[18.2-53.1]	Positive	0.27[0.05682-0.48872]	0.0132969	1
2	196033294	rs1588520	EIRA	non-risk	T	A	T	371	118	50	144	665	405	286	132	6.97[5.19-9.37]	1.10[0.75-1.62]	5.26[4.12-6.71]	Positive	0.22[0.03454-0.42507]	0.0210671	1	2	196033294	rs1588520	NARAC	non-risk	T	A	T	458	16	8	190	552	400	222	138	43.0[24.2-76.3]	1.18[0.48-2.89]	31.1[18.2-53.1]	Positive	0.27[0.05682-0.48872]	0.0132969	1
2	196038099	rs2220517	EIRA	non-risk	A	G	A	371	118	50	144	665	405	286	132	6.97[5.19-9.37]	1.10[0.75-1.62]	5.26[4.12-6.71]	Positive	0.22[0.03454-0.42507]	0.0210671	1	2	196038099	rs2220517	NARAC	non-risk	A	G	A	458	16	8	190	552	400	222	138	43.0[24.2-76.3]	1.18[0.48-2.89]	31.1[18.2-53.1]	Positive	0.27[0.05682-0.48872]	0.0132969	1
2	196035579	rs7422886	EIRA	non-risk	G	C	G	371	118	50	144	665	405	286	132	6.97[5.19-9.37]	1.10[0.75-1.62]	5.26[4.12-6.71]	Positive	0.22[0.03454-0.42507]	0.0210671	1	2	196035579	rs7422886	NARAC	non-risk	G	C	G	458	16	8	190	552	400	222	138	43.0[24.2-76.3]	1.18[0.48-2.89]	31.1[18.2-53.1]	Positive	0.27[0.05682-0.48872]	0.0132969	1
2	196017199	rs12621216	EIRA	risk	T	C	T	326	101	70	200	579	357	392	185	6.99[5.25-9.31]	1.14[0.80-1.63]	5.35[4.12-6.96]	Positive	0.21[0.03194-0.39403]	0.0211183	1	2	196017199	rs12621216	NARAC	non-risk	T	C	T	408	13	11	240	471	346	303	192	44.9[24.4-82.5]	1.32[0.57-3.09]	32.0[17.7-57.8]	Positive	0.27[0.08328-0.47421]	0.00518745	1
7	123905761	rs9969230	EIRA	risk	T	C	T	359	106	64	168	626	382	352	162	7.60[5.70-10.1]	1.30[0.91-1.88]	5.64[4.38-7.27]	Positive	0.21[0.03252-0.40133]	0.0211276	1	7	123905761	rs9969230	NARAC	non-risk	T	C	T	401	10	14	247	473	349	301	189	61.1[30.9-120.]	2.55[1.08-5.97]	44.6[23.0-86.6]	Positive	0.24[0.04268-0.44547]	0.0175294	1
16	25488890	rs8046048	EIRA	non-risk	A	G	A	188	59	112	345	356	227	623	317	6.46[4.67-8.94]	1.04[0.72-1.50]	5.05[3.60-7.08]	Positive	0.21[0.03164-0.39081]	0.0211432	1	16	25488890	rs8046048	NARAC	risk	A	G	A	250	7	17	398	243	218	531	320	42.6[19.4-93.5]	1.26[0.50-3.15]	29.6[13.3-65.8]	Positive	0.29[0.10955-0.48823]	0.00197462	1
1	6149122	rs2273042	EIRA	risk	A	G	A	426	131	40	107	756	448	223	96	7.64[5.60-10.4]	1.19[0.78-1.81]	5.55[4.41-6.99]	Positive	0.24[0.03697-0.45806]	0.021212	1	1	6149122	rs2273042	NARAC	non-risk	A	G	A	495	18	6	153	580	423	194	115	41.0[23.5-71.3]	1.09[0.41-2.88]	30.5[18.4-50.7]	Positive	0.25[0.02235-0.48218]	0.0315076	1
6	116810100	rs2352095	EIRA	risk	A	G	G	64	15	152	447	93	73	845	447	8.02[4.51-14.2]	1.41[0.78-2.56]	5.38[2.83-10.2]	Positive	0.27[0.04131-0.51253]	0.0212396	1	6	116810100	rs2352095	NARAC	non-risk	A	G	A	264	10	14	384	305	240	469	298	37.1[18.9-72.8]	1.08[0.46-2.55]	29.2[14.8-57.8]	Positive	0.20[0.00088-0.41808]	0.0490292	1
9	93538038	rs290265	EIRA	non-risk	G	A	A	27	8	162	504	54	44	914	490	6.32[2.84-14.0]	1.06[0.47-2.40]	4.06[1.67-9.85]	Positive	0.34[0.05146-0.64137]	0.0213364	1	9	93538038	rs290265	NARAC	non-risk	G	A	G	366	13	11	282	435	337	339	201	40.6[22.1-74.5]	1.14[0.49-2.66]	30.0[16.5-54.4]	Positive	0.25[0.06238-0.45340]	0.00972504	1
9	109796197	rs7390631	EIRA	non-risk	T	G	T	307	94	77	226	555	270	424	274	5.12[3.88-6.76]	1.10[0.77-1.56]	6.78[5.15-8.92]	Negative	-0.3[-0.6359--0.0509]	0.0213693	1	9	109796197	rs7390631	NARAC	non-risk	T	G	T	330	9	15	318	425	260	349	278	36.8[18.2-74.4]	1.69[0.71-4.01]	49.6[24.6-100.]	Negative	-0.3[-0.7178--0.0116]	0.0428958	1
11	104644334	rs12281159	EIRA	non-risk	C	T	T	32	10	156	483	60	50	876	475	5.93[2.88-12.2]	1.02[0.49-2.13]	3.91[1.74-8.75]	Positive	0.33[0.04981-0.62488]	0.0214739	1	11	104644334	rs12281159	NARAC	risk	C	T	C	393	11	13	255	425	329	349	209	47.0[24.6-89.8]	1.62[0.69-3.76]	36.2[19.1-68.5]	Positive	0.21[0.01172-0.42248]	0.0382752	1
2	196042305	rs13414955	EIRA	non-risk	G	A	G	371	118	50	144	664	405	285	132	6.95[5.17-9.34]	1.10[0.75-1.62]	5.25[4.12-6.70]	Positive	0.22[0.03361-0.42467]	0.0216226	1	2	196042305	rs13414955	NARAC	non-risk	G	A	G	458	16	8	190	552	400	222	138	43.0[24.2-76.3]	1.18[0.48-2.89]	31.1[18.2-53.1]	Positive	0.27[0.05682-0.48872]	0.0132969	1
20	59723157	rs6093063	EIRA	non-risk	T	G	T	256	68	103	277	460	222	519	322	6.19[4.57-8.38]	1.39[0.98-1.98]	7.87[5.75-10.7]	Negative	-0.3[-0.6231--0.0492]	0.0216415	1	20	59723157	rs6093063	NARAC	non-risk	T	G	T	283	8	16	365	363	224	411	314	36.4[17.3-76.5]	1.54[0.63-3.76]	50.4[23.8-106.]	Negative	-0.4[-0.7666--0.0339]	0.0322219	1
1	218150693	rs6656114	EIRA	non-risk	T	C	C	420	124	45	112	771	401	199	140	4.88[3.63-6.57]	1.36[0.91-2.04]	6.62[5.23-8.38]	Negative	-0.4[-0.7988--0.0630]	0.0216822	1	1	218150693	rs6656114	NARAC	risk	T	C	T	472	17	7	176	583	363	191	175	24.9[14.4-43.3]	1.16[0.45-2.93]	37.6[22.3-63.4]	Negative	-0.5[-0.9421--0.0831]	0.0193098	1
1	218150930	rs6671252	EIRA	non-risk	G	A	A	420	124	45	112	771	401	199	140	4.88[3.63-6.57]	1.36[0.91-2.04]	6.62[5.23-8.38]	Negative	-0.4[-0.7988--0.0630]	0.0216822	1	1	218150930	rs6671252	NARAC	risk	G	A	G	472	17	7	176	583	363	191	175	24.9[14.4-43.3]	1.16[0.45-2.93]	37.6[22.3-63.4]	Negative	-0.5[-0.9421--0.0831]	0.0193098	1
9	123852859	rs1323474	EIRA	risk	C	T	C	162	50	120	369	252	169	725	373	6.28[4.45-8.85]	1.02[0.70-1.50]	4.85[3.34-7.05]	Positive	0.22[0.03254-0.41243]	0.0216891	1	9	123852859	rs1323474	NARAC	risk	C	T	C	238	7	17	410	236	210	538	328	40.1[18.2-87.9]	1.16[0.46-2.92]	28.1[12.6-62.6]	Positive	0.29[0.10077-0.48447]	0.00279348	1
1	102562640	rs6684718	EIRA	risk	A	C	C	413	123	48	120	728	435	251	109	7.88[5.82-10.6]	1.32[0.89-1.96]	5.68[4.49-7.19]	Positive	0.23[0.03476-0.44090]	0.0216998	1	1	102562640	rs6684718	NARAC	non-risk	A	C	C	480	14	10	168	575	419	199	119	53.1[28.9-97.7]	2.18[0.92-5.14]	38.6[21.9-68.1]	Positive	0.24[0.01977-0.48012]	0.0333018	1
2	196034065	rs10209381	EIRA	non-risk	A	G	A	362	117	48	145	660	398	288	133	6.84[5.09-9.19]	1.03[0.70-1.52]	5.23[4.09-6.69]	Positive	0.22[0.03342-0.42455]	0.0217362	1	2	196034065	rs10209381	NARAC	non-risk	A	G	A	458	16	8	190	552	400	222	138	43.0[24.2-76.3]	1.18[0.48-2.89]	31.1[18.2-53.1]	Positive	0.27[0.05682-0.48872]	0.0132969	1
2	196002197	rs13423723	EIRA	non-risk	A	G	A	375	119	50	144	672	406	288	132	7.03[5.24-9.44]	1.10[0.75-1.62]	5.32[4.17-6.78]	Positive	0.22[0.03329-0.42371]	0.0217709	1	2	196002197	rs13423723	NARAC	non-risk	A	G	A	462	16	8	186	554	401	220	137	42.8[24.1-76.0]	1.21[0.49-2.98]	31.5[18.4-53.8]	Positive	0.25[0.03861-0.47869]	0.0212242	1
10	34714029	rs1342788	EIRA	risk	C	T	C	244	74	86	275	373	240	564	286	6.56[4.87-8.84]	1.01[0.70-1.44]	5.16[3.79-7.03]	Positive	0.21[0.03062-0.39141]	0.0218618	1	10	34714029	rs1342788	NARAC	risk	C	T	C	315	8	16	333	331	258	443	280	47.0[22.4-98.6]	1.54[0.63-3.75]	36.3[17.3-76.4]	Positive	0.21[0.01193-0.41976]	0.0380105	1
5	3088209	rs677400	EIRA	non-risk	G	A	G	246	74	95	284	463	291	516	252	6.90[5.10-9.34]	1.10[0.78-1.57]	5.38[3.98-7.26]	Positive	0.20[0.02966-0.37999]	0.021912	1	5	3088209	rs677400	NARAC	risk	G	A	G	312	10	14	336	361	277	413	261	41.9[21.4-82.1]	1.24[0.53-2.91]	31.1[15.9-60.8]	Positive	0.25[0.05777-0.44740]	0.0110444	1
2	196019466	rs4850589	EIRA	non-risk	C	T	C	371	118	50	144	666	405	286	132	6.97[5.19-9.36]	1.10[0.75-1.62]	5.27[4.13-6.72]	Positive	0.22[0.03308-0.42413]	0.0219255	1	2	196019466	rs4850589	NARAC	non-risk	C	T	C	461	16	8	187	554	401	220	137	42.6[24.0-75.7]	1.20[0.49-2.94]	31.4[18.3-53.6]	Positive	0.25[0.03908-0.47898]	0.020982	1
9	14215040	rs7044542	EIRA	risk	A	G	A	364	105	61	155	631	381	324	144	8.01[5.96-10.7]	1.37[0.95-1.99]	5.86[4.54-7.55]	Positive	0.22[0.03200-0.41073]	0.0219451	1	9	14215040	rs7044542	NARAC	non-risk	A	G	A	396	14	10	252	449	346	325	192	43.3[24.0-78.3]	1.32[0.56-3.11]	31.8[17.9-56.5]	Positive	0.25[0.06269-0.45471]	0.00968471	1
14	38155875	rs1951647	EIRA	risk	T	C	C	92	27	142	429	145	106	812	425	6.60[4.22-10.3]	1.12[0.70-1.80]	4.80[2.91-7.91]	Positive	0.25[0.03654-0.46911]	0.0219538	1	14	38155875	rs1951647	NARAC	risk	T	C	T	218	6	18	430	221	195	553	343	52.9[22.5-124.]	1.78[0.67-4.68]	39.2[16.4-93.2]	Positive	0.24[0.03665-0.45126]	0.021081	1
6	7033860	rs9505008	EIRA	non-risk	C	T	C	325	97	65	184	608	302	327	214	5.13[3.85-6.84]	1.17[0.81-1.68]	6.82[5.22-8.90]	Negative	-0.3[-0.6712--0.0521]	0.0220165	1	6	7033860	rs9505008	NARAC	non-risk	C	T	T	529	16	8	119	659	430	115	108	29.3[16.2-53.0]	2.52[1.02-6.24]	43.0[25.3-73.2]	Negative	-0.5[-1.0292--0.0107]	0.0453398	1
2	210291373	rs6435527	EIRA	non-risk	G	A	G	261	83	87	268	473	293	497	244	6.54[4.88-8.77]	1.02[0.72-1.45]	5.16[3.87-6.89]	Positive	0.20[0.02985-0.38458]	0.0220257	1	2	210291373	rs6435527	NARAC	non-risk	G	A	G	294	9	15	354	343	253	431	285	42.4[21.0-85.7]	1.31[0.55-3.11]	32.8[16.2-66.4]	Positive	0.21[0.01458-0.42153]	0.0356838	1
15	100550382	rs2727150	EIRA	risk	A	G	A	354	103	61	153	621	373	317	139	7.94[5.89-10.7]	1.36[0.94-1.97]	5.80[4.49-7.49]	Positive	0.22[0.03227-0.41620]	0.0220491	1	15	100550382	rs2727150	NARAC	risk	A	G	A	423	16	8	225	449	337	325	201	38.5[22.0-67.1]	1.04[0.42-2.52]	29.1[16.9-50.0]	Positive	0.24[0.04142-0.44406]	0.0181148	1
1	238966221	rs10802732	EIRA	non-risk	T	C	T	125	39	128	395	247	106	706	428	5.38[3.67-7.88]	1.04[0.69-1.58]	7.74[5.03-11.9]	Negative	-0.4[-0.8321--0.0643]	0.0220922	1	1	238966221	rs10802732	NARAC	non-risk	T	C	T	168	6	18	480	198	114	576	424	31.4[13.4-73.6]	1.09[0.41-2.88]	46.0[19.1-110.]	Negative	-0.4[-0.9158--0.0142]	0.0431897	1
6	116813701	rs9374605	EIRA	risk	A	G	G	64	15	152	445	93	73	842	446	8.01[4.50-14.2]	1.42[0.78-2.57]	5.38[2.83-10.2]	Positive	0.27[0.03947-0.51130]	0.022141	1	6	116813701	rs9374605	NARAC	non-risk	A	G	A	264	10	14	384	305	240	469	298	37.1[18.9-72.8]	1.08[0.46-2.55]	29.2[14.8-57.8]	Positive	0.20[0.00088-0.41808]	0.0490292	1
6	70897698	rs3749913	EIRA	non-risk	G	A	A	98	27	144	435	164	119	814	425	7.11[4.54-11.1]	1.21[0.75-1.94]	5.18[3.17-8.48]	Positive	0.24[0.03447-0.44679]	0.0221513	1	6	70897698	rs3749913	NARAC	non-risk	G	A	G	199	7	17	449	230	170	544	368	35.6[16.1-78.7]	1.03[0.41-2.61]	27.5[12.2-61.7]	Positive	0.22[0.01197-0.44285]	0.0385552	1
18	43234466	rs9961733	EIRA	risk	A	G	A	395	125	46	137	687	410	291	133	7.05[5.27-9.41]	1.06[0.71-1.57]	5.38[4.24-6.82]	Positive	0.22[0.03260-0.42294]	0.022168	1	18	43234466	rs9961733	NARAC	risk	A	G	A	451	14	10	197	527	396	247	142	48.1[26.5-87.4]	1.77[0.75-4.18]	36.0[20.4-63.5]	Positive	0.23[0.01759-0.45423]	0.0341744	1
2	196016237	rs34464245	EIRA	non-risk	A	T	A	371	119	49	143	666	405	283	131	6.89[5.13-9.25]	1.08[0.73-1.59]	5.23[4.10-6.67]	Positive	0.22[0.03258-0.42507]	0.0222858	1	2	196016237	rs34464245	NARAC	non-risk	A	T	A	461	16	8	187	554	401	220	137	42.6[24.0-75.7]	1.20[0.49-2.94]	31.4[18.3-53.6]	Positive	0.25[0.03908-0.47898]	0.020982	1
16	53877042	rs2388406	EIRA	risk	C	G	G	466	145	21	56	858	454	94	80	3.87[2.71-5.53]	1.21[0.70-2.07]	6.15[4.93-7.66]	Negative	-0.6[-1.1918--0.0912]	0.022317	1	16	53877042	rs2388406	NARAC	non-risk	C	G	C	442	14	10	206	546	360	228	178	28.7[15.9-51.9]	1.59[0.67-3.77]	43.6[24.6-77.2]	Negative	-0.5[-0.9616--0.1122]	0.0132152	1
9	16913043	rs4465052	EIRA	non-risk	G	A	G	297	82	86	229	553	272	399	249	5.90[4.40-7.91]	1.36[0.95-1.92]	7.56[5.67-10.0]	Negative	-0.3[-0.6354--0.0485]	0.0223631	1	9	16913043	rs4465052	NARAC	non-risk	G	A	G	369	13	11	279	432	260	342	278	28.0[15.4-51.0]	1.07[0.46-2.50]	38.6[21.2-70.2]	Negative	-0.3[-0.7385--0.0207]	0.0381637	1
14	39948014	rs4899291	EIRA	non-risk	G	A	G	352	104	63	176	634	384	341	158	7.42[5.55-9.92]	1.19[0.82-1.71]	5.62[4.36-7.24]	Positive	0.21[0.03083-0.40369]	0.0223642	1	14	39948014	rs4899291	NARAC	non-risk	G	A	G	432	12	12	216	489	374	285	164	52.9[28.2-99.4]	1.88[0.80-4.37]	37.2[20.2-68.3]	Positive	0.28[0.08185-0.47991]	0.00567268	1
4	14268049	rs13148052	EIRA	non-risk	C	T	T	29	6	165	504	33	30	946	514	8.88[3.66-21.5]	1.54[0.63-3.80]	5.10[1.85-14.0]	Positive	0.36[0.05156-0.67565]	0.0223775	1	4	14268049	rs13148052	NARAC	non-risk	C	T	C	228	8	16	420	294	227	480	311	41.9[19.8-88.4]	1.29[0.53-3.14]	32.4[15.3-68.9]	Positive	0.21[0.01198-0.42355]	0.0380693	1
1	92051670	rs6604044	EIRA	non-risk	T	C	C	484	156	10	30	919	524	40	13	9.89[5.13-19.0]	1.06[0.50-2.23]	5.55[4.49-6.85]	Positive	0.43[0.06110-0.80398]	0.0224629	1	1	92051670	rs6604044	NARAC	non-risk	T	C	T	379	13	11	269	432	329	342	209	44.1[24.1-80.7]	1.26[0.54-2.94]	30.5[16.8-55.1]	Positive	0.30[0.11739-0.48746]	0.00135742	1
2	196078229	rs7420620	EIRA	non-risk	A	G	A	393	123	39	111	701	424	219	99	7.26[5.30-9.95]	1.13[0.74-1.72]	5.34[4.21-6.77]	Positive	0.24[0.03471-0.45729]	0.0224882	1	2	196078229	rs7420620	NARAC	non-risk	A	G	A	502	17	7	146	600	430	174	108	46.6[26.2-82.9]	1.47[0.58-3.73]	33.1[19.7-55.7]	Positive	0.27[0.04829-0.50983]	0.0177801	1
2	196082306	rs7423607	EIRA	non-risk	C	T	C	393	123	39	111	701	424	219	99	7.26[5.30-9.95]	1.13[0.74-1.72]	5.34[4.21-6.77]	Positive	0.24[0.03471-0.45729]	0.0224882	1	2	196082306	rs7423607	NARAC	non-risk	C	T	C	502	17	7	146	600	430	174	108	46.6[26.2-82.9]	1.47[0.58-3.73]	33.1[19.7-55.7]	Positive	0.27[0.04829-0.50983]	0.0177801	1
15	42364362	rs1668588	EIRA	risk	A	G	A	423	133	35	108	755	444	220	97	7.30[5.35-9.97]	1.02[0.66-1.57]	5.48[4.36-6.90]	Positive	0.24[0.03458-0.45683]	0.0225456	1	15	42364362	rs1668588	NARAC	non-risk	A	G	A	525	17	7	123	638	458	136	80	52.1[28.8-94.2]	2.16[0.84-5.52]	35.9[21.4-60.3]	Positive	0.28[0.03855-0.53517]	0.023554	1
3	857458	rs1403919	EIRA	non-risk	A	G	G	61	18	146	454	81	62	860	461	6.44[3.75-11.0]	1.08[0.62-1.90]	4.42[2.36-8.26]	Positive	0.30[0.04223-0.55851]	0.0225667	1	3	857458	rs1403919	NARAC	risk	A	G	A	345	10	14	303	354	274	420	264	48.4[24.8-94.6]	1.73[0.74-4.07]	37.3[19.1-72.8]	Positive	0.21[0.01152-0.41830]	0.0383566	1
8	88570976	rs62525011	EIRA	non-risk	T	C	C	28	9	160	495	37	32	932	504	5.97[2.76-12.8]	1.02[0.46-2.24]	3.67[1.49-9.00]	Positive	0.38[0.05332-0.70729]	0.0226282	1	8	88570976	rs62525011	NARAC	non-risk	T	C	T	355	13	11	293	424	318	350	220	37.7[20.6-69.2]	1.06[0.45-2.47]	29.8[16.4-54.2]	Positive	0.20[0.00054-0.41534]	0.0493921	1
8	88571241	rs62525012	EIRA	non-risk	A	G	G	28	9	160	495	37	32	932	504	5.97[2.76-12.8]	1.02[0.46-2.24]	3.67[1.49-9.00]	Positive	0.38[0.05332-0.70729]	0.0226282	1	8	88571241	rs62525012	NARAC	non-risk	A	G	A	355	13	11	293	424	318	350	220	37.7[20.6-69.2]	1.06[0.45-2.47]	29.8[16.4-54.2]	Positive	0.20[0.00054-0.41534]	0.0493921	1
16	60332481	rs1376046	EIRA	non-risk	T	G	T	230	69	102	303	399	255	580	289	6.60[4.86-8.96]	1.07[0.75-1.52]	5.18[3.79-7.08]	Positive	0.20[0.02868-0.38059]	0.0226357	1	16	60332481	rs1376046	NARAC	non-risk	T	G	T	303	9	15	345	340	271	434	267	39.2[19.4-79.2]	1.14[0.48-2.71]	30.2[14.9-61.1]	Positive	0.22[0.02660-0.42554]	0.0263248	1
16	56114739	rs4784635	EIRA	non-risk	A	G	A	169	54	115	357	326	211	646	329	6.25[4.46-8.74]	1.01[0.69-1.46]	4.91[3.45-6.99]	Positive	0.21[0.02961-0.39517]	0.0227546	1	16	56114739	rs4784635	NARAC	non-risk	A	G	A	174	6	18	474	192	153	582	385	36.4[15.5-85.5]	1.07[0.40-2.83]	27.6[11.5-66.2]	Positive	0.23[0.01879-0.46042]	0.0334348	1
9	16913473	rs6475092	EIRA	non-risk	A	G	A	297	83	86	229	555	273	399	249	5.83[4.35-7.81]	1.34[0.94-1.90]	7.48[5.62-9.95]	Negative	-0.3[-0.6340--0.0474]	0.0227935	1	9	16913473	rs6475092	NARAC	non-risk	A	G	A	369	13	11	279	432	260	342	278	28.0[15.4-51.0]	1.07[0.46-2.50]	38.6[21.2-70.2]	Negative	-0.3[-0.7385--0.0207]	0.0381637	1
11	9979332	rs7951950	EIRA	non-risk	T	C	C	102	33	137	422	150	104	817	430	5.99[3.97-9.05]	1.00[0.64-1.55]	4.46[2.79-7.12]	Positive	0.25[0.03546-0.47449]	0.0228046	1	11	9979332	rs7951950	NARAC	non-risk	T	C	T	207	6	18	441	223	175	551	363	41.7[17.9-97.1]	1.26[0.48-3.31]	31.0[13.1-73.1]	Positive	0.25[0.04374-0.45999]	0.0176958	1
16	60344982	rs4559896	EIRA	non-risk	C	T	C	217	67	99	303	388	245	576	286	6.48[4.75-8.84]	1.01[0.71-1.45]	5.12[3.72-7.04]	Positive	0.20[0.02880-0.38622]	0.0228497	1	16	60344982	rs4559896	NARAC	non-risk	C	T	C	300	9	15	348	335	267	439	271	38.6[19.1-78.1]	1.12[0.47-2.67]	30.0[14.8-60.8]	Positive	0.21[0.01763-0.42066]	0.0330447	1
5	57060702	rs11953600	EIRA	risk	C	T	T	400	124	41	120	703	415	254	113	7.31[5.41-9.89]	1.06[0.70-1.60]	5.53[4.36-7.01]	Positive	0.23[0.03264-0.43783]	0.0228569	1	5	57060702	rs11953600	NARAC	risk	C	T	T	509	16	8	139	570	431	204	107	49.3[27.5-88.1]	2.11[0.86-5.17]	36.5[21.4-62.4]	Positive	0.23[0.00181-0.46951]	0.0482403	1
5	57058693	rs34656967	EIRA	risk	G	A	A	400	124	41	120	703	415	254	113	7.31[5.41-9.89]	1.06[0.70-1.60]	5.53[4.36-7.01]	Positive	0.23[0.03264-0.43783]	0.0228569	1	5	57058693	rs34656967	NARAC	risk	G	A	A	509	16	8	139	570	431	204	107	49.3[27.5-88.1]	2.11[0.86-5.17]	36.5[21.4-62.4]	Positive	0.23[0.00181-0.46951]	0.0482403	1
5	57059852	rs41465246	EIRA	risk	C	T	T	400	124	41	120	703	415	254	113	7.31[5.41-9.89]	1.06[0.70-1.60]	5.53[4.36-7.01]	Positive	0.23[0.03264-0.43783]	0.0228569	1	5	57059852	rs41465246	NARAC	risk	C	T	T	509	16	8	139	570	431	204	107	49.3[27.5-88.1]	2.11[0.86-5.17]	36.5[21.4-62.4]	Positive	0.23[0.00181-0.46951]	0.0482403	1
10	30632228	rs2689214	EIRA	risk	A	G	A	248	65	100	271	425	274	530	256	8.01[5.85-10.9]	1.39[0.97-1.99]	6.00[4.37-8.22]	Positive	0.20[0.02801-0.37660]	0.0229053	1	10	30632228	rs2689214	NARAC	non-risk	A	G	A	285	10	14	363	321	259	453	279	40.3[20.5-79.1]	1.19[0.51-2.80]	30.1[15.3-59.4]	Positive	0.24[0.05138-0.44305]	0.0133523	1
9	16913616	rs6475094	EIRA	non-risk	A	G	A	292	83	86	229	550	269	400	249	5.74[4.28-7.69]	1.31[0.92-1.87]	7.38[5.54-9.83]	Negative	-0.3[-0.6357--0.0467]	0.023141	1	9	16913616	rs6475094	NARAC	non-risk	A	G	A	369	13	11	279	432	260	342	278	28.0[15.4-51.0]	1.07[0.46-2.50]	38.6[21.2-70.2]	Negative	-0.3[-0.7385--0.0207]	0.0381637	1
1	20965442	rs3738133	EIRA	non-risk	C	T	T	488	152	19	45	900	478	79	66	3.78[2.59-5.51]	1.37[0.78-2.43]	6.18[4.98-7.66]	Negative	-0.7[-1.3699--0.1004]	0.0232028	1	1	20965442	rs3738133	NARAC	non-risk	C	T	C	307	11	13	341	384	243	390	295	27.4[14.4-52.0]	1.02[0.44-2.38]	39.7[20.8-75.9]	Negative	-0.4[-0.8319--0.0704]	0.0202102	1
1	20965013	rs10916842	EIRA	non-risk	G	A	A	487	152	19	45	900	478	79	66	3.77[2.58-5.50]	1.37[0.77-2.43]	6.16[4.97-7.64]	Negative	-0.7[-1.3691--0.0999]	0.0232771	1	1	20965013	rs10916842	NARAC	non-risk	G	A	G	307	11	13	341	384	243	390	295	27.4[14.4-52.0]	1.02[0.44-2.38]	39.7[20.8-75.9]	Negative	-0.4[-0.8319--0.0704]	0.0202102	1
14	39977496	rs1304254	EIRA	non-risk	C	T	C	329	100	70	204	579	353	399	190	7.00[5.27-9.31]	1.10[0.77-1.58]	5.43[4.18-7.05]	Positive	0.20[0.02849-0.39031]	0.0232847	1	14	39977496	rs1304254	NARAC	non-risk	C	T	C	372	10	14	276	425	332	349	206	54.1[27.5-106.]	1.94[0.82-4.55]	39.0[20.0-75.9]	Positive	0.26[0.06757-0.45386]	0.00814975	1
6	7037637	rs13212734	EIRA	non-risk	G	A	G	359	110	54	152	661	329	280	186	4.93[3.70-6.56]	1.14[0.78-1.67]	6.63[5.15-8.54]	Negative	-0.3[-0.6980--0.0509]	0.0233048	1	6	7037637	rs13212734	NARAC	non-risk	G	A	A	499	15	9	149	627	406	147	132	30.3[16.8-54.9]	2.37[0.98-5.68]	44.8[25.8-77.6]	Negative	-0.5[-0.9879--0.0530]	0.0290916	1
9	16913514	rs6475093	EIRA	non-risk	C	G	C	291	80	86	230	546	268	400	249	5.94[4.42-7.98]	1.36[0.95-1.93]	7.60[5.69-10.1]	Negative	-0.3[-0.6337--0.0461]	0.0233453	1	9	16913514	rs6475093	NARAC	non-risk	C	G	C	369	13	11	279	432	260	342	278	28.0[15.4-51.0]	1.07[0.46-2.50]	38.6[21.2-70.2]	Negative	-0.3[-0.7385--0.0207]	0.0381637	1
8	18690037	rs13256850	EIRA	non-risk	C	A	A	66	21	144	464	105	76	846	455	6.18[3.71-10.2]	1.01[0.59-1.72]	4.42[2.48-7.88]	Positive	0.28[0.03791-0.52602]	0.0235456	1	8	18690037	rs13256850	NARAC	risk	C	A	C	345	7	17	303	347	282	427	256	60.4[27.6-131.]	2.30[0.92-5.76]	46.5[21.3-101.]	Positive	0.20[0.00446-0.41158]	0.0451733	1
16	60330362	rs9302721	EIRA	non-risk	G	A	G	230	69	99	300	398	255	572	287	6.56[4.83-8.90]	1.04[0.73-1.49]	5.17[3.78-7.06]	Positive	0.20[0.02737-0.38104]	0.0236083	1	16	60330362	rs9302721	NARAC	non-risk	G	A	G	303	9	15	345	340	271	434	267	39.2[19.4-79.2]	1.14[0.48-2.71]	30.2[14.9-61.1]	Positive	0.22[0.02660-0.42554]	0.0263248	1
2	196001833	rs9646823	EIRA	non-risk	A	T	A	375	119	50	144	672	406	287	132	7.01[5.22-9.41]	1.10[0.75-1.62]	5.32[4.17-6.78]	Positive	0.22[0.03006-0.42191]	0.0237744	1	2	196001833	rs9646823	NARAC	non-risk	A	T	A	462	16	8	186	554	401	220	137	42.8[24.1-76.0]	1.21[0.49-2.98]	31.5[18.4-53.8]	Positive	0.25[0.03861-0.47869]	0.0212242	1
1	180241155	rs3806302	EIRA	risk	T	G	T	446	132	27	67	793	469	147	58	8.63[6.01-12.4]	1.37[0.83-2.24]	5.83[4.64-7.31]	Positive	0.28[0.03719-0.52642]	0.0239434	1	1	180241155	rs3806302	NARAC	risk	T	G	T	552	18	6	96	633	473	141	65	47.9[26.6-86.1]	1.78[0.66-4.78]	34.1[20.6-56.4]	Positive	0.27[0.00727-0.53570]	0.0440163	1
16	60335984	rs993647	EIRA	non-risk	T	C	T	230	69	98	300	399	254	569	284	6.59[4.85-8.95]	1.03[0.72-1.48]	5.20[3.81-7.12]	Positive	0.20[0.02692-0.38158]	0.0239729	1	16	60335984	rs993647	NARAC	non-risk	T	C	T	303	9	15	345	340	271	434	267	39.2[19.4-79.2]	1.14[0.48-2.71]	30.2[14.9-61.1]	Positive	0.22[0.02660-0.42554]	0.0263248	1
18	43236105	rs1318572	EIRA	risk	C	T	C	395	124	47	138	686	410	293	134	7.10[5.32-9.48]	1.08[0.73-1.60]	5.41[4.27-6.87]	Positive	0.22[0.02961-0.42010]	0.023987	1	18	43236105	rs1318572	NARAC	risk	C	T	C	451	14	10	197	528	396	246	142	47.9[26.4-87.1]	1.77[0.75-4.18]	36.1[20.4-63.6]	Positive	0.23[0.01136-0.45100]	0.0392747	1
18	43236346	rs923073	EIRA	risk	A	G	A	395	124	47	138	686	410	293	134	7.10[5.32-9.48]	1.08[0.73-1.60]	5.41[4.27-6.87]	Positive	0.22[0.02961-0.42010]	0.023987	1	18	43236346	rs923073	NARAC	risk	A	G	A	451	14	10	197	528	396	246	142	47.9[26.4-87.1]	1.77[0.75-4.18]	36.1[20.4-63.6]	Positive	0.23[0.01136-0.45100]	0.0392747	1
1	216983409	rs2576238	EIRA	non-risk	T	C	C	34	9	152	478	47	40	896	483	6.85[3.24-14.4]	1.15[0.53-2.46]	4.32[1.84-10.1]	Positive	0.34[0.04547-0.64561]	0.0240058	1	1	216983409	rs2576238	NARAC	non-risk	T	C	T	363	12	12	285	434	327	340	211	43.4[23.2-81.3]	1.20[0.52-2.80]	30.2[16.3-55.9]	Positive	0.30[0.11334-0.48704]	0.00163834	1
7	40882773	rs758010	EIRA	risk	T	A	T	336	101	70	196	572	351	400	189	7.22[5.43-9.59]	1.20[0.84-1.71]	5.52[4.25-7.17]	Positive	0.20[0.02705-0.38736]	0.0241735	1	7	40882773	rs758010	NARAC	non-risk	T	A	T	406	15	9	242	474	350	300	188	40.2[22.6-71.5]	1.15[0.48-2.74]	30.5[17.4-53.2]	Positive	0.23[0.03269-0.44399]	0.023109	1
1	181299951	rs12094454	EIRA	risk	C	T	C	431	137	34	102	749	442	230	102	7.21[5.31-9.79]	1.05[0.68-1.62]	5.43[4.32-6.81]	Positive	0.23[0.03125-0.44808]	0.0241981	1	1	181299951	rs12094454	NARAC	non-risk	C	T	C	540	18	6	108	648	473	126	65	48.0[26.5-86.8]	1.42[0.53-3.80]	32.7[19.7-54.1]	Positive	0.30[0.05354-0.56623]	0.0178187	1
14	38174359	rs17179337	EIRA	non-risk	G	A	A	95	29	141	435	153	109	824	431	6.35[4.11-9.80]	1.05[0.66-1.67]	4.71[2.90-7.65]	Positive	0.24[0.03231-0.46470]	0.0242597	1	14	38174359	rs17179337	NARAC	risk	G	A	G	220	6	18	428	224	198	550	340	53.4[22.7-125.]	1.79[0.68-4.71]	39.1[16.4-92.9]	Positive	0.25[0.04932-0.45730]	0.0149339	1
6	116809715	rs4031586	EIRA	risk	C	T	T	66	15	153	448	96	74	850	446	8.37[4.71-14.8]	1.47[0.81-2.65]	5.65[2.98-10.7]	Positive	0.26[0.03494-0.50274]	0.0242723	1	6	116809715	rs4031586	NARAC	non-risk	C	T	C	264	10	14	384	305	240	469	298	37.1[18.9-72.8]	1.08[0.46-2.55]	29.2[14.8-57.8]	Positive	0.20[0.00088-0.41808]	0.0490292	1
5	5927970	rs10056196	EIRA	non-risk	A	G	G	22	7	158	497	27	25	907	494	6.13[2.59-14.5]	1.04[0.43-2.49]	3.58[1.30-9.88]	Positive	0.40[0.05303-0.76440]	0.0243052	1	5	5927970	rs10056196	NARAC	risk	A	G	A	453	17	7	195	521	394	253	144	42.0[24.1-73.3]	1.04[0.41-2.63]	29.1[17.2-49.3]	Positive	0.30[0.10867-0.50135]	0.00232791	1
14	39976329	rs1955729	EIRA	non-risk	C	A	C	329	100	70	204	580	353	399	190	7.00[5.27-9.31]	1.10[0.77-1.58]	5.44[4.18-7.06]	Positive	0.20[0.02680-0.38919]	0.0244555	1	14	39976329	rs1955729	NARAC	non-risk	C	A	C	372	10	14	276	425	332	349	206	54.1[27.5-106.]	1.94[0.82-4.55]	39.0[20.0-75.9]	Positive	0.26[0.06757-0.45386]	0.00814975	1
14	39972614	rs7140641	EIRA	non-risk	A	T	A	329	100	70	204	580	353	399	190	7.00[5.27-9.31]	1.10[0.77-1.58]	5.44[4.18-7.06]	Positive	0.20[0.02680-0.38919]	0.0244555	1	14	39972614	rs7140641	NARAC	non-risk	A	T	A	372	10	14	276	426	332	348	206	53.6[27.3-105.]	1.94[0.82-4.55]	39.2[20.1-76.4]	Positive	0.25[0.05538-0.44653]	0.011903	1
10	34715017	rs10827366	EIRA	risk	A	T	A	243	73	87	278	371	238	567	287	6.64[4.92-8.95]	1.02[0.71-1.46]	5.23[3.83-7.14]	Positive	0.20[0.02669-0.38867]	0.024508	1	10	34715017	rs10827366	NARAC	risk	A	T	A	311	8	16	337	326	254	448	284	46.4[22.1-97.4]	1.50[0.62-3.65]	35.6[16.9-75.0]	Positive	0.22[0.01877-0.42420]	0.0322284	1
15	90373107	rs11639214	EIRA	risk	G	A	A	120	29	137	396	195	136	763	388	8.33[5.44-12.7]	1.44[0.91-2.26]	6.03[3.79-9.58]	Positive	0.22[0.02875-0.41883]	0.0245116	1	15	90373107	rs11639214	NARAC	risk	G	A	G	483	18	6	165	544	424	230	114	45.4[26.2-78.8]	1.08[0.41-2.85]	29.1[17.5-48.5]	Positive	0.35[0.16469-0.54756]	0.000266086	0.508256
14	69229736	rs72731530	EIRA	non-risk	A	G	A	258	76	89	262	458	218	495	312	5.42[4.04-7.28]	1.12[0.79-1.60]	7.13[5.26-9.67]	Negative	-0.3[-0.6345--0.0435]	0.024532	1	14	69229736	rs72731530	NARAC	non-risk	A	G	A	355	11	13	293	415	256	359	282	31.2[16.4-59.5]	1.34[0.57-3.12]	44.1[23.1-84.1]	Negative	-0.4[-0.7931--0.0497]	0.0262741	1
14	84154062	rs10130561	EIRA	non-risk	C	A	C	142	45	119	371	250	165	699	361	6.37[4.43-9.16]	1.04[0.70-1.54]	4.92[3.32-7.28]	Positive	0.22[0.02836-0.41457]	0.0245799	1	14	84154062	rs10130561	NARAC	non-risk	C	A	C	451	16	8	197	554	394	220	144	43.3[24.4-77.0]	1.33[0.54-3.24]	32.5[19.0-55.7]	Positive	0.24[0.01987-0.46360]	0.0327175	1
1	218125700	rs4314948	EIRA	non-risk	C	T	T	488	150	16	27	906	485	50	46	3.46[2.22-5.38]	1.86[0.97-3.59]	6.21[5.01-7.71]	Negative	-1.0[-1.9622--0.1337]	0.0246618	1	1	218125700	rs4314948	NARAC	non-risk	C	T	C	280	10	14	368	356	194	418	344	28.4[14.5-55.5]	1.06[0.45-2.50]	41.8[21.2-82.5]	Negative	-0.4[-0.8657--0.0825]	0.0176298	1
15	89251636	rs73453848	EIRA	risk	A	G	A	407	126	43	125	726	430	251	111	7.45[5.51-10.0]	1.13[0.76-1.70]	5.58[4.41-7.05]	Positive	0.23[0.02963-0.43593]	0.0247063	1	15	89251636	rs73453848	NARAC	risk	A	G	A	511	18	6	137	571	437	203	101	49.0[27.9-85.8]	1.01[0.38-2.65]	28.4[17.1-47.3]	Positive	0.41[0.23218-0.60473]	1.06686e-05	0.0397731
15	89252258	rs73453849	EIRA	risk	T	G	T	407	126	43	125	726	430	251	111	7.45[5.51-10.0]	1.13[0.76-1.70]	5.58[4.41-7.05]	Positive	0.23[0.02963-0.43593]	0.0247063	1	15	89252258	rs73453849	NARAC	risk	T	G	T	511	18	6	137	571	437	203	101	49.0[27.9-85.8]	1.01[0.38-2.65]	28.4[17.1-47.3]	Positive	0.41[0.23218-0.60473]	1.06686e-05	0.0397731
17	73786080	rs9893894	EIRA	non-risk	C	T	C	365	110	56	153	654	401	290	135	7.34[5.45-9.88]	1.21[0.83-1.77]	5.48[4.27-7.03]	Positive	0.22[0.02839-0.41778]	0.0247135	1	17	73786080	rs9893894	NARAC	non-risk	C	T	C	445	15	9	203	526	381	248	157	42.1[23.5-75.2]	1.27[0.53-3.05]	32.2[18.6-55.9]	Positive	0.22[0.00484-0.44924]	0.0452058	1
2	34222006	rs1848963	EIRA	non-risk	G	A	G	291	93	78	238	476	295	492	242	6.43[4.85-8.53]	1.01[0.71-1.43]	5.11[3.87-6.74]	Positive	0.20[0.02580-0.38158]	0.0248096	1	2	34222006	rs1848963	NARAC	risk	G	A	G	372	10	14	276	393	304	381	234	47.4[24.2-92.7]	1.63[0.69-3.83]	36.7[18.9-71.5]	Positive	0.21[0.00703-0.41579]	0.0426132	1
18	43240240	rs12051997	EIRA	risk	C	T	C	396	124	46	136	685	409	293	134	7.12[5.33-9.50]	1.08[0.73-1.60]	5.44[4.29-6.90]	Positive	0.22[0.02837-0.41962]	0.0248167	1	18	43240240	rs12051997	NARAC	risk	C	T	C	452	14	10	196	528	396	246	142	48.0[26.4-87.3]	1.79[0.75-4.22]	36.2[20.5-63.7]	Positive	0.23[0.01099-0.45079]	0.0395899	1
9	93538540	rs290263	EIRA	non-risk	A	C	C	27	8	163	506	54	44	925	500	6.26[2.81-13.9]	1.07[0.47-2.41]	4.06[1.67-9.85]	Positive	0.34[0.04308-0.63810]	0.024842	1	9	93538540	rs290263	NARAC	non-risk	A	C	A	367	13	11	281	437	337	337	201	40.3[22.0-73.9]	1.14[0.49-2.66]	30.2[16.6-54.8]	Positive	0.24[0.04778-0.44491]	0.01503	1
1	180241474	rs73046409	EIRA	risk	T	C	T	446	132	27	67	795	469	147	58	8.63[6.01-12.4]	1.37[0.83-2.24]	5.84[4.65-7.33]	Positive	0.28[0.03545-0.52549]	0.0248544	1	1	180241474	rs73046409	NARAC	risk	T	C	T	552	18	6	96	633	473	141	65	47.9[26.6-86.1]	1.78[0.66-4.78]	34.1[20.6-56.4]	Positive	0.27[0.00727-0.53570]	0.0440163	1
1	180241673	rs73046412	EIRA	risk	T	C	T	446	132	27	67	795	469	147	58	8.63[6.01-12.4]	1.37[0.83-2.24]	5.84[4.65-7.33]	Positive	0.28[0.03545-0.52549]	0.0248544	1	1	180241673	rs73046412	NARAC	risk	T	C	T	552	18	6	96	633	473	141	65	47.9[26.6-86.1]	1.78[0.66-4.78]	34.1[20.6-56.4]	Positive	0.27[0.00727-0.53570]	0.0440163	1
8	136845360	rs11783501	EIRA	non-risk	C	T	T	460	145	21	52	843	453	84	70	3.78[2.61-5.47]	1.31[0.76-2.25]	6.06[4.86-7.56]	Negative	-0.6[-1.2825--0.0865]	0.024864	1	8	136845360	rs11783501	NARAC	non-risk	C	T	C	343	10	14	305	422	261	352	277	35.1[17.9-68.8]	1.68[0.71-3.94]	50.3[25.6-98.6]	Negative	-0.4[-0.8268--0.0760]	0.0184216	1
9	16913286	rs4631563	EIRA	non-risk	A	C	A	296	83	86	229	548	270	400	249	5.83[4.35-7.80]	1.33[0.94-1.89]	7.44[5.59-9.91]	Negative	-0.3[-0.6279--0.0422]	0.0249104	1	9	16913286	rs4631563	NARAC	non-risk	A	C	A	369	13	11	279	432	260	342	278	28.0[15.4-51.0]	1.07[0.46-2.50]	38.6[21.2-70.2]	Negative	-0.3[-0.7385--0.0207]	0.0381637	1
2	196002614	rs2217469	EIRA	risk	A	G	A	330	101	70	203	585	358	394	186	7.07[5.31-9.41]	1.14[0.80-1.62]	5.46[4.20-7.09]	Positive	0.20[0.02613-0.38923]	0.0249494	1	2	196002614	rs2217469	NARAC	non-risk	A	G	A	409	13	11	239	471	346	303	192	45.1[24.5-82.9]	1.34[0.57-3.13]	32.2[17.8-58.1]	Positive	0.27[0.08294-0.47391]	0.00524504	1
16	60327936	rs999488	EIRA	non-risk	A	G	A	229	69	98	297	398	254	571	286	6.54[4.81-8.88]	1.04[0.73-1.49]	5.17[3.78-7.07]	Positive	0.20[0.02554-0.38042]	0.0249541	1	16	60327936	rs999488	NARAC	non-risk	A	G	A	303	9	15	345	340	271	434	267	39.2[19.4-79.2]	1.14[0.48-2.71]	30.2[14.9-61.1]	Positive	0.22[0.02660-0.42554]	0.0263248	1
14	39889812	rs2899889	EIRA	non-risk	A	G	A	352	106	59	159	629	386	305	142	7.23[5.38-9.72]	1.20[0.82-1.74]	5.43[4.21-6.99]	Positive	0.22[0.02779-0.41412]	0.0249581	1	14	39889812	rs2899889	NARAC	non-risk	A	G	A	421	12	12	227	486	374	288	164	52.7[28.0-99.1]	1.73[0.74-4.03]	35.7[19.4-65.7]	Positive	0.30[0.11727-0.50050]	0.00157985	1
9	9177013	rs1968589	EIRA	non-risk	T	C	C	391	117	50	126	767	392	190	133	4.90[3.61-6.64]	1.33[0.90-1.97]	6.64[5.21-8.45]	Negative	-0.4[-0.7956--0.0533]	0.0249689	1	9	9177013	rs1968589	NARAC	non-risk	C	T	T	500	15	9	148	616	404	158	134	29.9[16.6-53.9]	1.92[0.79-4.65]	42.1[24.3-72.7]	Negative	-0.4[-0.8655--0.0061]	0.0467948	1
15	89251447	rs55997659	EIRA	risk	T	C	T	407	126	43	124	725	430	251	111	7.45[5.51-10.0]	1.14[0.76-1.71]	5.57[4.40-7.04]	Positive	0.23[0.02923-0.43580]	0.0249716	1	15	89251447	rs55997659	NARAC	risk	T	C	T	511	18	6	137	571	437	203	101	49.0[27.9-85.8]	1.01[0.38-2.65]	28.4[17.1-47.3]	Positive	0.41[0.23218-0.60473]	1.06686e-05	0.0397731
5	57061411	rs62358441	EIRA	risk	C	T	T	391	123	41	121	694	410	252	113	7.15[5.28-9.68]	1.04[0.68-1.57]	5.44[4.29-6.91]	Positive	0.23[0.02912-0.43675]	0.0250845	1	5	57061411	rs62358441	NARAC	risk	C	T	T	509	16	8	139	570	431	204	107	49.3[27.5-88.1]	2.11[0.86-5.17]	36.5[21.4-62.4]	Positive	0.23[0.00181-0.46951]	0.0482403	1
14	52840811	rs7145700	EIRA	non-risk	G	T	T	32	8	158	482	55	48	885	478	7.48[3.41-16.3]	1.30[0.58-2.88]	4.76[1.99-11.3]	Positive	0.32[0.04028-0.60518]	0.0251197	1	14	52840811	rs7145700	NARAC	risk	G	T	G	389	15	9	259	410	317	364	221	36.8[20.8-65.0]	1.00[0.42-2.38]	28.7[16.4-50.3]	Positive	0.22[0.01621-0.42515]	0.0343922	1
6	116814606	rs6936442	EIRA	risk	C	T	T	64	14	152	444	93	73	841	445	8.57[4.74-15.4]	1.52[0.82-2.80]	5.74[2.98-11.0]	Positive	0.26[0.03330-0.50326]	0.0252347	1	6	116814606	rs6936442	NARAC	non-risk	C	T	C	264	10	14	384	305	240	469	298	37.1[18.9-72.8]	1.08[0.46-2.55]	29.2[14.8-57.8]	Positive	0.20[0.00088-0.41808]	0.0490292	1
6	116814837	rs7751233	EIRA	risk	T	C	C	64	14	152	444	93	73	841	445	8.57[4.74-15.4]	1.52[0.82-2.80]	5.74[2.98-11.0]	Positive	0.26[0.03330-0.50326]	0.0252347	1	6	116814837	rs7751233	NARAC	non-risk	T	C	T	264	10	14	384	305	240	469	298	37.1[18.9-72.8]	1.08[0.46-2.55]	29.2[14.8-57.8]	Positive	0.20[0.00088-0.41808]	0.0490292	1
6	116815212	rs7751753	EIRA	risk	G	A	A	64	14	152	444	93	73	841	445	8.57[4.74-15.4]	1.52[0.82-2.80]	5.74[2.98-11.0]	Positive	0.26[0.03330-0.50326]	0.0252347	1	6	116815212	rs7751753	NARAC	non-risk	G	A	G	264	10	14	384	305	240	469	298	37.1[18.9-72.8]	1.08[0.46-2.55]	29.2[14.8-57.8]	Positive	0.20[0.00088-0.41808]	0.0490292	1
9	611838	rs10815342	EIRA	non-risk	C	G	G	134	34	133	390	261	115	705	422	6.74[4.53-10.0]	1.35[0.88-2.07]	9.08[5.86-14.0]	Negative	-0.4[-0.7513--0.0495]	0.0252894	1	9	611838	rs10815342	NARAC	non-risk	G	C	C	488	14	10	160	606	401	168	137	30.2[16.5-55.1]	1.92[0.81-4.54]	43.8[24.9-77.2]	Negative	-0.4[-0.9262--0.0383]	0.0332415	1
1	20273680	rs4654990	EIRA	non-risk	G	C	C	464	145	18	46	856	453	87	72	3.85[2.66-5.55]	1.24[0.69-2.22]	6.17[4.95-7.69]	Negative	-0.6[-1.2504--0.0823]	0.0253241	1	1	20273680	rs4654990	NARAC	non-risk	G	C	G	362	14	10	286	433	271	341	267	28.2[15.7-50.6]	1.09[0.46-2.55]	38.4[21.4-68.7]	Negative	-0.3[-0.7170--0.0069]	0.0456598	1
5	57061365	rs62358440	EIRA	risk	T	C	C	400	124	41	121	703	416	252	113	7.26[5.36-9.82]	1.05[0.69-1.59]	5.51[4.35-6.99]	Positive	0.23[0.02869-0.43567]	0.0253276	1	5	57061365	rs62358440	NARAC	risk	T	C	C	509	16	8	139	570	431	204	107	49.3[27.5-88.1]	2.11[0.86-5.17]	36.5[21.4-62.4]	Positive	0.23[0.00181-0.46951]	0.0482403	1
2	34222246	rs2368016	EIRA	non-risk	G	T	G	291	93	78	238	478	296	492	242	6.43[4.85-8.53]	1.01[0.71-1.43]	5.11[3.88-6.74]	Positive	0.20[0.02492-0.38078]	0.0254471	1	2	34222246	rs2368016	NARAC	risk	G	T	G	372	10	14	276	393	304	381	234	47.4[24.2-92.7]	1.63[0.69-3.83]	36.7[18.9-71.5]	Positive	0.21[0.00703-0.41579]	0.0426132	1
1	175201727	rs2012862	EIRA	non-risk	G	T	T	462	138	33	71	844	444	135	100	4.65[3.37-6.42]	1.57[0.99-2.48]	6.46[5.17-8.09]	Negative	-0.5[-0.9626--0.0629]	0.0254509	1	1	175201727	rs2012862	NARAC	non-risk	G	T	G	405	11	13	243	485	316	289	222	34.6[18.1-66.1]	1.72[0.73-4.00]	46.6[24.6-88.2]	Negative	-0.3[-0.7259--0.0092]	0.0443427	1
14	84154282	rs12881081	EIRA	non-risk	G	A	G	142	46	120	370	253	166	699	360	6.26[4.36-8.97]	1.03[0.69-1.53]	4.84[3.28-7.15]	Positive	0.22[0.02707-0.41385]	0.0254593	1	14	84154282	rs12881081	NARAC	non-risk	G	A	G	451	16	8	197	554	394	220	144	43.3[24.4-77.0]	1.33[0.54-3.24]	32.5[19.0-55.7]	Positive	0.24[0.01987-0.46360]	0.0327175	1
18	47575725	rs17715957	EIRA	risk	G	A	G	327	93	70	195	521	329	430	205	7.46[5.60-9.93]	1.26[0.88-1.80]	5.67[4.33-7.43]	Positive	0.20[0.02503-0.38366]	0.0255038	1	18	47575725	rs17715957	NARAC	non-risk	G	A	G	361	11	13	287	429	327	345	211	43.3[22.6-82.6]	1.30[0.56-3.02]	32.4[17.1-61.3]	Positive	0.24[0.04486-0.44298]	0.016317	1
7	40882643	rs732890	EIRA	risk	C	T	C	336	101	70	197	572	351	407	193	7.19[5.42-9.55]	1.19[0.83-1.70]	5.52[4.25-7.17]	Positive	0.20[0.02505-0.38460]	0.0255355	1	7	40882643	rs732890	NARAC	non-risk	C	T	C	406	15	9	242	474	350	300	188	40.2[22.6-71.5]	1.15[0.48-2.74]	30.5[17.4-53.2]	Positive	0.23[0.03269-0.44399]	0.023109	1
5	57058428	rs56035618	EIRA	risk	G	T	T	400	124	41	120	702	416	252	113	7.25[5.36-9.81]	1.06[0.70-1.60]	5.51[4.34-6.98]	Positive	0.23[0.02829-0.43556]	0.0255932	1	5	57058428	rs56035618	NARAC	risk	G	T	T	509	16	8	139	570	431	204	107	49.3[27.5-88.1]	2.11[0.86-5.17]	36.5[21.4-62.4]	Positive	0.23[0.00181-0.46951]	0.0482403	1
2	196050148	rs1858301	EIRA	risk	G	C	G	401	127	39	109	723	435	221	99	7.23[5.29-9.89]	1.14[0.75-1.73]	5.34[4.22-6.75]	Positive	0.24[0.02941-0.45349]	0.0256208	1	2	196050148	rs1858301	NARAC	non-risk	G	C	G	500	17	7	148	600	429	174	109	45.6[25.7-81.2]	1.45[0.57-3.68]	33.1[19.7-55.7]	Positive	0.26[0.02933-0.49909]	0.0274675	1
5	106884480	rs464950	EIRA	risk	A	G	A	162	47	121	365	283	187	687	351	6.82[4.80-9.69]	1.13[0.76-1.66]	5.25[3.61-7.64]	Positive	0.21[0.02568-0.39662]	0.0256488	1	5	106884480	rs464950	NARAC	non-risk	A	G	A	226	8	16	422	244	209	530	329	39.6[18.8-83.5]	1.14[0.47-2.79]	27.9[13.1-59.7]	Positive	0.29[0.09708-0.48374]	0.00323702	1
5	3088781	rs2442700	EIRA	non-risk	T	C	T	246	74	97	287	463	291	516	253	6.87[5.08-9.30]	1.12[0.79-1.59]	5.37[3.98-7.26]	Positive	0.20[0.02428-0.37604]	0.0257017	1	5	3088781	rs2442700	NARAC	risk	T	C	T	311	10	14	337	360	277	414	261	41.9[21.4-82.1]	1.23[0.52-2.89]	30.9[15.8-60.5]	Positive	0.25[0.06251-0.45020]	0.00953945	1
6	134845139	rs9402615	EIRA	non-risk	G	A	A	502	159	10	26	928	530	44	14	10.0[5.38-18.9]	1.24[0.58-2.64]	5.62[4.56-6.94]	Positive	0.41[0.05070-0.78570]	0.0257174	1	6	134845139	rs9402615	NARAC	non-risk	G	A	G	415	16	8	233	454	338	320	200	39.9[22.8-69.8]	1.13[0.46-2.76]	29.9[17.4-51.4]	Positive	0.24[0.04726-0.44688]	0.0153672	1
15	39178147	rs56152793	EIRA	non-risk	G	A	G	431	132	33	91	806	462	162	68	8.16[5.77-11.5]	1.20[0.77-1.87]	5.79[4.61-7.27]	Positive	0.26[0.03223-0.49951]	0.0257218	1	15	39178147	rs56152793	NARAC	non-risk	G	A	G	547	18	6	101	641	464	133	74	49.8[27.7-89.6]	1.72[0.64-4.63]	33.8[20.4-55.9]	Positive	0.30[0.05470-0.56126]	0.0171579	1
9	16912988	rs4246134	EIRA	non-risk	T	C	T	293	81	85	229	549	271	396	247	5.90[4.39-7.92]	1.34[0.94-1.91]	7.52[5.63-10.0]	Negative	-0.3[-0.6256--0.0403]	0.0257308	1	9	16912988	rs4246134	NARAC	non-risk	T	C	T	369	13	11	279	432	260	342	278	28.0[15.4-51.0]	1.07[0.46-2.50]	38.6[21.2-70.2]	Negative	-0.3[-0.7385--0.0207]	0.0381637	1
1	20945452	rs12128671	EIRA	non-risk	G	A	A	470	150	20	56	871	459	98	80	3.86[2.72-5.49]	1.14[0.66-1.97]	6.07[4.88-7.54]	Negative	-0.6[-1.1403--0.0735]	0.0257376	1	1	20945452	rs12128671	NARAC	risk	G	A	G	326	12	12	322	440	271	334	267	25.7[13.8-48.0]	1.01[0.43-2.34]	39.4[21.2-73.4]	Negative	-0.5[-0.9342--0.1291]	0.00963014	1
1	20945931	rs12129599	EIRA	non-risk	G	A	A	470	150	20	56	871	459	98	80	3.86[2.72-5.49]	1.14[0.66-1.97]	6.07[4.88-7.54]	Negative	-0.6[-1.1403--0.0735]	0.0257376	1	1	20945931	rs12129599	NARAC	risk	G	A	G	326	12	12	322	440	271	334	267	25.7[13.8-48.0]	1.01[0.43-2.34]	39.4[21.2-73.4]	Negative	-0.5[-0.9342--0.1291]	0.00963014	1
1	20945979	rs4655229	EIRA	non-risk	A	G	G	470	150	20	56	871	459	98	80	3.86[2.72-5.49]	1.14[0.66-1.97]	6.07[4.88-7.54]	Negative	-0.6[-1.1403--0.0735]	0.0257376	1	1	20945979	rs4655229	NARAC	risk	A	G	A	326	12	12	322	440	271	334	267	25.7[13.8-48.0]	1.01[0.43-2.34]	39.4[21.2-73.4]	Negative	-0.5[-0.9342--0.1291]	0.00963014	1
1	20944517	rs10916831	EIRA	non-risk	A	G	G	465	149	20	55	861	454	98	80	3.85[2.71-5.47]	1.15[0.67-1.99]	6.04[4.85-7.52]	Negative	-0.6[-1.1438--0.0737]	0.0257497	1	1	20944517	rs10916831	NARAC	risk	A	G	A	326	12	12	322	440	271	334	267	25.7[13.8-48.0]	1.01[0.43-2.34]	39.4[21.2-73.4]	Negative	-0.5[-0.9342--0.1291]	0.00963014	1
6	7038265	rs13202703	EIRA	non-risk	A	G	A	357	110	54	154	657	328	280	186	4.90[3.68-6.52]	1.12[0.76-1.63]	6.57[5.10-8.47]	Negative	-0.3[-0.6887--0.0442]	0.0257858	1	6	7038265	rs13202703	NARAC	non-risk	A	G	G	499	15	9	149	627	406	147	132	30.3[16.8-54.9]	2.37[0.98-5.68]	44.8[25.8-77.6]	Negative	-0.5[-0.9879--0.0530]	0.0290916	1
1	20944469	rs10916830	EIRA	non-risk	T	C	C	469	150	20	56	871	459	98	80	3.85[2.71-5.47]	1.14[0.66-1.96]	6.05[4.87-7.53]	Negative	-0.6[-1.1398--0.0731]	0.0258195	1	1	20944469	rs10916830	NARAC	risk	T	C	T	326	12	12	322	440	271	334	267	25.7[13.8-48.0]	1.01[0.43-2.34]	39.4[21.2-73.4]	Negative	-0.5[-0.9342--0.1291]	0.00963014	1
15	42366754	rs1618007	EIRA	risk	A	G	A	420	132	35	110	740	440	215	97	7.17[5.25-9.80]	1.00[0.65-1.54]	5.42[4.31-6.83]	Positive	0.24[0.02920-0.45538]	0.0258356	1	15	42366754	rs1618007	NARAC	non-risk	A	G	A	524	17	7	124	636	458	138	80	52.7[29.2-95.4]	2.15[0.84-5.49]	35.8[21.3-60.1]	Positive	0.29[0.05600-0.54239]	0.0158917	1
7	40880591	rs1921756	EIRA	risk	C	T	C	312	93	74	205	546	340	406	194	7.19[5.38-9.62]	1.22[0.86-1.75]	5.49[4.19-7.19]	Positive	0.20[0.02476-0.38620]	0.0258444	1	7	40880591	rs1921756	NARAC	non-risk	C	T	C	378	14	10	270	435	334	339	204	41.8[23.2-75.4]	1.12[0.48-2.63]	28.9[16.2-51.5]	Positive	0.30[0.12070-0.48916]	0.00117784	1
18	43236681	rs2035533	EIRA	risk	A	C	A	395	124	47	138	686	409	293	134	7.10[5.32-9.48]	1.08[0.73-1.60]	5.43[4.28-6.89]	Positive	0.22[0.02682-0.41842]	0.025849	1	18	43236681	rs2035533	NARAC	risk	A	C	A	451	14	10	197	528	396	246	142	47.9[26.4-87.1]	1.77[0.75-4.18]	36.1[20.4-63.6]	Positive	0.23[0.01136-0.45100]	0.0392747	1
2	34224520	rs6746192	EIRA	non-risk	T	C	T	294	93	78	238	480	297	491	241	6.51[4.91-8.63]	1.02[0.72-1.45]	5.17[3.92-6.82]	Positive	0.20[0.02431-0.37994]	0.0258799	1	2	34224520	rs6746192	NARAC	risk	T	C	T	372	10	14	276	393	304	381	234	47.4[24.2-92.7]	1.63[0.69-3.83]	36.7[18.9-71.5]	Positive	0.21[0.00703-0.41579]	0.0426132	1
1	20944230	rs12127536	EIRA	non-risk	C	A	A	459	148	20	53	860	459	89	74	3.73[2.59-5.36]	1.20[0.69-2.08]	5.94[4.77-7.39]	Negative	-0.6[-1.2167--0.0776]	0.0259265	1	1	20944230	rs12127536	NARAC	risk	C	A	C	326	12	12	322	440	271	334	267	25.7[13.8-48.0]	1.01[0.43-2.34]	39.4[21.2-73.4]	Negative	-0.5[-0.9342--0.1291]	0.00963014	1
1	20944922	rs61781970	EIRA	non-risk	T	C	C	467	149	20	56	867	457	98	80	3.87[2.72-5.49]	1.14[0.66-1.97]	6.07[4.88-7.55]	Negative	-0.6[-1.1388--0.0725]	0.0259663	1	1	20944922	rs61781970	NARAC	risk	T	C	T	326	12	12	322	440	271	334	267	25.7[13.8-48.0]	1.01[0.43-2.34]	39.4[21.2-73.4]	Negative	-0.5[-0.9342--0.1291]	0.00963014	1
10	58555325	rs72792316	EIRA	non-risk	A	C	A	345	107	59	183	609	367	364	170	6.99[5.25-9.29]	1.04[0.72-1.50]	5.47[4.24-7.05]	Positive	0.21[0.02527-0.39672]	0.0259673	1	10	58555325	rs72792316	NARAC	risk	A	C	A	407	14	10	241	448	339	326	199	40.0[22.2-71.8]	1.19[0.50-2.79]	31.0[17.4-54.9]	Positive	0.22[0.01286-0.42791]	0.0373869	1
6	70892371	rs34437604	EIRA	non-risk	A	G	G	98	27	143	434	165	119	810	424	7.09[4.53-11.0]	1.20[0.75-1.93]	5.21[3.18-8.52]	Positive	0.23[0.02810-0.44306]	0.0260476	1	6	70892371	rs34437604	NARAC	non-risk	A	G	A	199	7	17	449	230	170	544	368	35.6[16.1-78.7]	1.03[0.41-2.61]	27.5[12.2-61.7]	Positive	0.22[0.01197-0.44285]	0.0385552	1
6	70892299	rs9354908	EIRA	non-risk	T	A	A	98	27	143	434	165	119	810	424	7.09[4.53-11.0]	1.20[0.75-1.93]	5.21[3.18-8.52]	Positive	0.23[0.02810-0.44306]	0.0260476	1	6	70892299	rs9354908	NARAC	non-risk	T	A	T	199	7	17	449	230	170	544	368	35.6[16.1-78.7]	1.03[0.41-2.61]	27.5[12.2-61.7]	Positive	0.22[0.01197-0.44285]	0.0385552	1
11	21586339	rs10766833	EIRA	non-risk	C	T	T	21	6	164	510	29	27	938	513	6.47[2.59-16.1]	1.11[0.44-2.82]	3.80[1.33-10.8]	Positive	0.39[0.04678-0.74091]	0.0261332	1	11	21586339	rs10766833	NARAC	non-risk	C	T	C	440	16	8	208	540	377	234	161	39.2[22.2-69.2]	1.02[0.41-2.48]	29.8[17.4-51.1]	Positive	0.23[0.01860-0.45801]	0.0335039	1
1	238972827	rs12754570	EIRA	non-risk	T	G	T	111	32	133	400	225	96	727	433	5.95[3.93-9.02]	1.16[0.74-1.81]	8.43[5.29-13.4]	Negative	-0.4[-0.8339--0.0526]	0.0261514	1	1	238972827	rs12754570	NARAC	non-risk	T	G	T	168	6	18	480	198	114	576	424	31.4[13.4-73.6]	1.09[0.41-2.88]	46.0[19.1-110.]	Negative	-0.4[-0.9158--0.0142]	0.0431897	1
5	3088785	rs2442699	EIRA	non-risk	T	A	T	246	74	97	286	463	291	516	253	6.87[5.08-9.30]	1.12[0.79-1.59]	5.37[3.98-7.26]	Positive	0.19[0.02365-0.37558]	0.0261854	1	5	3088785	rs2442699	NARAC	risk	T	A	T	311	10	14	337	360	277	414	261	41.9[21.4-82.1]	1.23[0.52-2.89]	30.9[15.8-60.5]	Positive	0.25[0.06251-0.45020]	0.00953945	1
18	43241873	rs7226686	EIRA	risk	C	T	C	396	124	47	137	685	409	293	134	7.12[5.33-9.50]	1.09[0.74-1.62]	5.43[4.28-6.89]	Positive	0.22[0.02628-0.41816]	0.0262214	1	18	43241873	rs7226686	NARAC	risk	C	T	C	452	14	10	196	528	396	246	142	48.0[26.4-87.3]	1.79[0.75-4.22]	36.2[20.5-63.7]	Positive	0.23[0.01099-0.45079]	0.0395899	1
18	43238022	rs7237704	EIRA	risk	C	T	C	396	124	47	137	685	409	293	134	7.12[5.33-9.50]	1.09[0.74-1.62]	5.43[4.28-6.89]	Positive	0.22[0.02628-0.41816]	0.0262214	1	18	43238022	rs7237704	NARAC	risk	C	T	C	452	14	10	196	528	396	246	142	48.0[26.4-87.3]	1.79[0.75-4.22]	36.2[20.5-63.7]	Positive	0.23[0.01099-0.45079]	0.0395899	1
18	43238318	rs7239287	EIRA	risk	T	G	T	396	124	47	137	685	409	293	134	7.12[5.33-9.50]	1.09[0.74-1.62]	5.43[4.28-6.89]	Positive	0.22[0.02628-0.41816]	0.0262214	1	18	43238318	rs7239287	NARAC	risk	T	G	T	452	14	10	196	528	396	246	142	48.0[26.4-87.3]	1.79[0.75-4.22]	36.2[20.5-63.7]	Positive	0.23[0.01099-0.45079]	0.0395899	1
7	40884420	rs1921753	EIRA	risk	T	C	T	336	101	70	196	572	351	405	192	7.19[5.41-9.55]	1.20[0.84-1.71]	5.52[4.25-7.17]	Positive	0.20[0.02414-0.38438]	0.0262351	1	7	40884420	rs1921753	NARAC	non-risk	T	C	T	406	15	9	242	474	350	300	188	40.2[22.6-71.5]	1.15[0.48-2.74]	30.5[17.4-53.2]	Positive	0.23[0.03269-0.44399]	0.023109	1
7	40884242	rs1921754	EIRA	risk	T	C	T	336	101	70	196	572	351	405	192	7.19[5.41-9.55]	1.20[0.84-1.71]	5.52[4.25-7.17]	Positive	0.20[0.02414-0.38438]	0.0262351	1	7	40884242	rs1921754	NARAC	non-risk	T	C	T	406	15	9	242	474	350	300	188	40.2[22.6-71.5]	1.15[0.48-2.74]	30.5[17.4-53.2]	Positive	0.23[0.03269-0.44399]	0.023109	1
7	40883236	rs4425648	EIRA	risk	G	T	G	336	101	70	196	572	351	405	192	7.19[5.41-9.55]	1.20[0.84-1.71]	5.52[4.25-7.17]	Positive	0.20[0.02414-0.38438]	0.0262351	1	7	40883236	rs4425648	NARAC	non-risk	G	T	G	406	15	9	242	474	350	300	188	40.2[22.6-71.5]	1.15[0.48-2.74]	30.5[17.4-53.2]	Positive	0.23[0.03269-0.44399]	0.023109	1
7	40883552	rs4720379	EIRA	risk	A	G	A	336	101	70	196	572	351	405	192	7.19[5.41-9.55]	1.20[0.84-1.71]	5.52[4.25-7.17]	Positive	0.20[0.02414-0.38438]	0.0262351	1	7	40883552	rs4720379	NARAC	non-risk	A	G	A	406	15	9	242	474	350	300	188	40.2[22.6-71.5]	1.15[0.48-2.74]	30.5[17.4-53.2]	Positive	0.23[0.03269-0.44399]	0.023109	1
7	40884534	rs4720380	EIRA	risk	G	A	G	336	101	70	196	572	351	405	192	7.19[5.41-9.55]	1.20[0.84-1.71]	5.52[4.25-7.17]	Positive	0.20[0.02414-0.38438]	0.0262351	1	7	40884534	rs4720380	NARAC	non-risk	G	A	G	407	15	9	241	474	350	300	188	40.3[22.6-71.5]	1.15[0.48-2.75]	30.5[17.5-53.2]	Positive	0.23[0.03263-0.44400]	0.0231483	1
7	40883434	rs4723982	EIRA	risk	A	G	A	336	101	70	196	572	351	405	192	7.19[5.41-9.55]	1.20[0.84-1.71]	5.52[4.25-7.17]	Positive	0.20[0.02414-0.38438]	0.0262351	1	7	40883434	rs4723982	NARAC	non-risk	A	G	A	406	15	9	242	474	350	300	188	40.2[22.6-71.5]	1.15[0.48-2.74]	30.5[17.4-53.2]	Positive	0.23[0.03269-0.44399]	0.023109	1
10	58555423	rs12770039	EIRA	non-risk	C	A	C	346	107	59	183	609	367	364	170	7.01[5.27-9.32]	1.04[0.72-1.51]	5.48[4.25-7.07]	Positive	0.21[0.02489-0.39641]	0.0262396	1	10	58555423	rs12770039	NARAC	risk	C	A	C	407	14	10	241	448	339	326	199	40.0[22.2-71.8]	1.19[0.50-2.79]	31.0[17.4-54.9]	Positive	0.22[0.01286-0.42791]	0.0373869	1
5	106889160	rs352609	EIRA	non-risk	G	C	G	168	53	117	351	293	192	669	344	6.23[4.45-8.72]	1.04[0.72-1.52]	4.86[3.39-6.96]	Positive	0.21[0.02502-0.39868]	0.0262448	1	5	106889160	rs352609	NARAC	non-risk	G	C	G	246	8	16	402	273	221	501	317	42.3[20.1-89.0]	1.29[0.53-3.14]	31.5[14.8-67.0]	Positive	0.24[0.04648-0.44844]	0.0158088	1
1	238972905	rs12755761	EIRA	non-risk	T	C	T	126	35	133	398	241	105	726	432	6.16[4.14-9.16]	1.21[0.79-1.85]	8.54[5.48-13.3]	Negative	-0.4[-0.7913--0.0495]	0.0262788	1	1	238972905	rs12755761	NARAC	non-risk	T	C	T	168	6	18	480	198	114	576	424	31.4[13.4-73.6]	1.09[0.41-2.88]	46.0[19.1-110.]	Negative	-0.4[-0.9158--0.0142]	0.0431897	1
5	57060394	rs35264987	EIRA	risk	C	T	T	400	124	41	120	703	416	252	113	7.26[5.36-9.81]	1.06[0.70-1.60]	5.51[4.35-6.99]	Positive	0.23[0.02708-0.43482]	0.0263886	1	5	57060394	rs35264987	NARAC	risk	C	T	T	509	16	8	139	570	431	204	107	49.3[27.5-88.1]	2.11[0.86-5.17]	36.5[21.4-62.4]	Positive	0.23[0.00181-0.46951]	0.0482403	1
5	57059734	rs36055353	EIRA	risk	C	A	A	400	124	41	120	703	416	252	113	7.26[5.36-9.81]	1.06[0.70-1.60]	5.51[4.35-6.99]	Positive	0.23[0.02708-0.43482]	0.0263886	1	5	57059734	rs36055353	NARAC	risk	C	A	A	509	16	8	139	570	431	204	107	49.3[27.5-88.1]	2.11[0.86-5.17]	36.5[21.4-62.4]	Positive	0.23[0.00181-0.46951]	0.0482403	1
13	83268631	rs2184162	EIRA	non-risk	A	G	G	426	129	42	105	805	419	170	123	4.65[3.42-6.31]	1.29[0.86-1.95]	6.41[5.09-8.08]	Negative	-0.4[-0.8363--0.0520]	0.0264024	1	13	83268631	rs2184162	NARAC	non-risk	G	A	A	500	18	6	148	609	398	165	140	23.8[13.7-41.1]	1.02[0.38-2.72]	35.6[21.4-59.2]	Negative	-0.4[-0.9491--0.0478]	0.0301399	1
2	196025770	rs10165180	EIRA	non-risk	C	T	C	370	118	50	144	665	404	284	132	6.91[5.14-9.28]	1.10[0.75-1.62]	5.26[4.12-6.71]	Positive	0.22[0.02615-0.42039]	0.0264146	1	2	196025770	rs10165180	NARAC	non-risk	C	T	C	458	16	8	190	552	400	222	138	43.0[24.2-76.3]	1.18[0.48-2.89]	31.1[18.2-53.1]	Positive	0.27[0.05682-0.48872]	0.0132969	1
9	603192	rs1532309	EIRA	non-risk	T	G	G	138	35	136	395	266	118	711	425	6.72[4.54-9.94]	1.36[0.89-2.07]	8.98[5.83-13.8]	Negative	-0.3[-0.7350--0.0456]	0.0264474	1	9	603192	rs1532309	NARAC	non-risk	G	T	T	490	14	10	158	605	400	169	138	30.2[16.5-55.2]	1.93[0.81-4.58]	44.1[25.0-77.6]	Negative	-0.4[-0.9317--0.0434]	0.0314092	1
9	603125	rs2804296	EIRA	non-risk	A	G	G	138	35	136	395	266	118	711	425	6.72[4.54-9.94]	1.36[0.89-2.07]	8.98[5.83-13.8]	Negative	-0.3[-0.7350--0.0456]	0.0264474	1	9	603125	rs2804296	NARAC	non-risk	G	A	A	490	14	10	158	605	400	169	138	30.2[16.5-55.2]	1.93[0.81-4.58]	44.1[25.0-77.6]	Negative	-0.4[-0.9317--0.0434]	0.0314092	1
7	40886758	rs7808304	EIRA	risk	G	A	G	336	100	70	196	571	351	405	192	7.26[5.46-9.65]	1.21[0.85-1.73]	5.57[4.28-7.23]	Positive	0.20[0.02382-0.38400]	0.0264637	1	7	40886758	rs7808304	NARAC	non-risk	G	A	G	407	15	9	241	474	350	300	188	40.3[22.6-71.5]	1.15[0.48-2.75]	30.5[17.5-53.2]	Positive	0.23[0.03263-0.44400]	0.0231483	1
7	40886716	rs7808678	EIRA	risk	A	G	A	336	100	70	196	571	351	405	192	7.26[5.46-9.65]	1.21[0.85-1.73]	5.57[4.28-7.23]	Positive	0.20[0.02382-0.38400]	0.0264637	1	7	40886716	rs7808678	NARAC	non-risk	A	G	A	407	15	9	241	474	350	300	188	40.3[22.6-71.5]	1.15[0.48-2.75]	30.5[17.5-53.2]	Positive	0.23[0.03263-0.44400]	0.0231483	1
1	20945055	rs1048977	EIRA	non-risk	T	C	C	467	149	20	56	867	458	98	80	3.87[2.73-5.50]	1.14[0.66-1.97]	6.06[4.87-7.54]	Negative	-0.6[-1.1345--0.0702]	0.0264998	1	1	20945055	rs1048977	NARAC	risk	T	C	T	326	12	12	322	440	271	334	267	25.7[13.8-48.0]	1.01[0.43-2.34]	39.4[21.2-73.4]	Negative	-0.5[-0.9342--0.1291]	0.00963014	1
1	20948101	rs72650831	EIRA	non-risk	C	T	T	471	151	20	57	873	460	98	80	3.85[2.71-5.46]	1.11[0.65-1.92]	6.04[4.86-7.51]	Negative	-0.6[-1.1317--0.0699]	0.0265368	1	1	20948101	rs72650831	NARAC	risk	C	T	C	326	12	12	322	440	271	334	267	25.7[13.8-48.0]	1.01[0.43-2.34]	39.4[21.2-73.4]	Negative	-0.5[-0.9342--0.1291]	0.00963014	1
18	49224023	rs2655917	EIRA	non-risk	G	A	A	109	35	136	419	191	131	782	411	5.98[4.00-8.93]	1.00[0.65-1.54]	4.57[2.93-7.12]	Positive	0.23[0.02715-0.44255]	0.0266732	1	18	49224023	rs2655917	NARAC	non-risk	G	A	G	176	6	18	472	226	174	548	364	42.8[18.2-100.]	1.30[0.49-3.42]	31.6[13.2-75.1]	Positive	0.25[0.04891-0.46277]	0.0153786	1
10	58550151	rs10825887	EIRA	non-risk	C	A	C	345	108	59	183	609	366	364	170	6.92[5.21-9.20]	1.03[0.71-1.49]	5.43[4.21-7.00]	Positive	0.21[0.02424-0.39640]	0.0267326	1	10	58550151	rs10825887	NARAC	risk	C	A	C	408	14	10	240	448	339	326	199	40.0[22.3-71.9]	1.19[0.50-2.80]	31.0[17.5-55.0]	Positive	0.22[0.01273-0.42787]	0.037505	1
14	39975677	rs2207293	EIRA	non-risk	A	G	A	329	101	70	204	580	353	399	191	6.89[5.19-9.15]	1.09[0.77-1.56]	5.38[4.14-6.98]	Positive	0.20[0.02364-0.38718]	0.0267631	1	14	39975677	rs2207293	NARAC	non-risk	A	G	A	372	10	14	276	425	332	349	206	54.1[27.5-106.]	1.94[0.82-4.55]	39.0[20.0-75.9]	Positive	0.26[0.06757-0.45386]	0.00814975	1
19	46926667	rs11083825	EIRA	non-risk	C	T	C	167	37	129	343	307	145	638	376	7.72[5.27-11.2]	1.69[1.12-2.55]	9.77[6.48-14.7]	Negative	-0.3[-0.6714--0.0409]	0.0267887	1	19	46926667	rs11083825	NARAC	non-risk	C	T	C	479	11	13	169	572	350	202	188	39.9[20.8-76.7]	3.92[1.67-9.18]	61.8[32.8-116.]	Negative	-0.6[-1.0685--0.1679]	0.00712488	1
1	20964789	rs12408590	EIRA	non-risk	T	A	A	487	152	19	45	897	477	79	65	3.82[2.61-5.58]	1.37[0.77-2.43]	6.15[4.96-7.63]	Negative	-0.7[-1.3362--0.0813]	0.0268211	1	1	20964789	rs12408590	NARAC	non-risk	T	A	T	307	11	13	341	384	243	390	295	27.4[14.4-52.0]	1.02[0.44-2.38]	39.7[20.8-75.9]	Negative	-0.4[-0.8319--0.0704]	0.0202102	1
14	39967199	rs1807940	EIRA	non-risk	C	T	C	329	100	71	204	579	353	400	191	6.98[5.26-9.28]	1.12[0.79-1.60]	5.42[4.17-7.05]	Positive	0.20[0.02345-0.38654]	0.0268794	1	14	39967199	rs1807940	NARAC	non-risk	C	T	C	371	10	14	277	427	332	347	206	53.3[27.1-104.]	1.92[0.82-4.51]	39.2[20.1-76.3]	Positive	0.24[0.05016-0.44360]	0.0139003	1
6	152842018	rs2623981	EIRA	non-risk	C	T	C	258	83	88	275	447	280	532	264	6.41[4.79-8.57]	1.01[0.71-1.43]	5.11[3.82-6.83]	Positive	0.20[0.02285-0.37870]	0.0269812	1	6	152842018	rs2623981	NARAC	risk	C	T	C	316	8	16	332	334	274	440	264	51.1[24.4-107.]	1.74[0.72-4.23]	38.4[18.3-80.4]	Positive	0.23[0.03771-0.43115]	0.0195018	1
1	181300430	rs12089255	EIRA	risk	A	G	A	431	137	33	100	749	442	225	100	7.18[5.28-9.76]	1.04[0.67-1.62]	5.43[4.32-6.81]	Positive	0.23[0.02701-0.44828]	0.0270128	1	1	181300430	rs12089255	NARAC	non-risk	A	G	A	540	18	6	108	648	473	126	65	48.0[26.5-86.8]	1.42[0.53-3.80]	32.7[19.7-54.1]	Positive	0.30[0.05354-0.56623]	0.0178187	1
2	207980922	rs2359965	EIRA	risk	G	C	C	25	6	162	500	22	22	944	510	7.98[3.21-19.7]	1.37[0.54-3.44]	4.41[1.50-12.9]	Positive	0.39[0.04541-0.75450]	0.0270316	1	2	207980922	rs2359965	NARAC	risk	G	C	G	464	14	10	184	484	393	290	145	54.5[30.1-98.6]	1.94[0.82-4.56]	34.7[19.6-61.3]	Positive	0.34[0.16309-0.52792]	0.000205271	0.475753
10	30641134	rs11818836	EIRA	non-risk	T	C	T	148	40	127	366	233	160	718	368	7.27[5.00-10.5]	1.26[0.84-1.90]	5.44[3.62-8.17]	Positive	0.21[0.02434-0.40645]	0.0271214	1	10	30641134	rs11818836	NARAC	non-risk	T	C	T	195	6	18	453	214	175	560	363	43.0[18.3-100.]	1.33[0.50-3.51]	32.5[13.6-77.5]	Positive	0.23[0.02043-0.44959]	0.0318173	1
1	218149826	rs7520319	EIRA	non-risk	G	A	A	420	126	45	112	773	402	202	140	4.88[3.63-6.56]	1.34[0.90-2.01]	6.53[5.16-8.25]	Negative	-0.4[-0.7683--0.0459]	0.0271591	1	1	218149826	rs7520319	NARAC	risk	G	A	G	472	17	7	176	583	363	191	175	24.9[14.4-43.3]	1.16[0.45-2.93]	37.6[22.3-63.4]	Negative	-0.5[-0.9421--0.0831]	0.0193098	1
10	103066975	rs592620	EIRA	risk	A	G	G	88	21	145	425	148	108	807	415	8.24[5.03-13.4]	1.42[0.85-2.37]	5.85[3.41-10.0]	Positive	0.23[0.02676-0.44839]	0.0271869	1	10	103066975	rs592620	NARAC	risk	A	G	A	235	8	16	413	255	190	519	348	39.3[18.6-82.8]	1.20[0.49-2.92]	30.6[14.3-65.4]	Positive	0.21[0.00331-0.42711]	0.0465136	1
10	103066983	rs592641	EIRA	risk	A	G	G	88	21	145	425	148	108	807	415	8.24[5.03-13.4]	1.42[0.85-2.37]	5.85[3.41-10.0]	Positive	0.23[0.02676-0.44839]	0.0271869	1	10	103066983	rs592641	NARAC	risk	A	G	A	235	8	16	413	255	190	519	348	39.3[18.6-82.8]	1.20[0.49-2.92]	30.6[14.3-65.4]	Positive	0.21[0.00331-0.42711]	0.0465136	1
4	39618752	rs11097000	EIRA	risk	A	G	A	183	56	115	350	313	204	665	337	6.57[4.73-9.14]	1.08[0.74-1.56]	5.13[3.62-7.29]	Positive	0.20[0.02309-0.38996]	0.0273311	1	4	39618752	rs11097000	NARAC	non-risk	A	G	A	238	8	16	410	269	205	505	333	37.4[17.8-78.6]	1.09[0.45-2.66]	28.9[13.6-61.3]	Positive	0.22[0.01813-0.43217]	0.0330312	1
9	14215318	rs7044603	EIRA	risk	G	A	G	365	105	63	159	635	383	332	149	7.96[5.94-10.6]	1.38[0.96-2.00]	5.87[4.56-7.57]	Positive	0.21[0.02367-0.40202]	0.0274304	1	9	14215318	rs7044603	NARAC	non-risk	G	A	G	396	14	10	252	449	346	325	192	43.3[24.0-78.3]	1.32[0.56-3.11]	31.8[17.9-56.5]	Positive	0.25[0.06269-0.45471]	0.00968471	1
15	90373439	rs11639336	EIRA	risk	G	A	A	120	29	137	395	195	136	762	389	8.30[5.42-12.7]	1.44[0.92-2.27]	6.03[3.79-9.58]	Positive	0.22[0.02448-0.41608]	0.0274482	1	15	90373439	rs11639336	NARAC	risk	G	A	G	483	18	6	165	544	424	230	114	45.4[26.2-78.8]	1.08[0.41-2.85]	29.1[17.5-48.5]	Positive	0.35[0.16469-0.54756]	0.000266086	0.508256
6	80714233	rs465483	EIRA	risk	T	G	T	143	38	129	379	232	160	713	369	7.38[5.05-10.8]	1.27[0.84-1.92]	5.52[3.65-8.33]	Positive	0.21[0.02389-0.40621]	0.0274539	1	6	80714233	rs465483	NARAC	non-risk	G	T	G	179	6	18	469	208	169	566	369	35.7[15.2-83.8]	1.04[0.39-2.74]	27.2[11.4-64.9]	Positive	0.23[0.02069-0.45423]	0.031786	1
19	46927425	rs2871704	EIRA	non-risk	G	A	G	168	37	131	346	307	145	648	380	7.80[5.34-11.4]	1.71[1.13-2.58]	9.84[6.53-14.8]	Negative	-0.3[-0.6658--0.0391]	0.0274637	1	19	46927425	rs2871704	NARAC	non-risk	G	A	G	478	11	13	170	572	350	202	188	39.5[20.5-75.8]	3.86[1.64-9.05]	61.8[32.8-116.]	Negative	-0.6[-1.0940--0.1822]	0.00607914	1
1	20947810	rs12752425	EIRA	non-risk	T	C	C	468	151	20	57	870	460	98	80	3.82[2.69-5.43]	1.11[0.64-1.91]	5.99[4.82-7.44]	Negative	-0.5[-1.1235--0.0654]	0.0276289	1	1	20947810	rs12752425	NARAC	risk	T	C	T	326	12	12	322	440	271	334	267	25.7[13.8-48.0]	1.01[0.43-2.34]	39.4[21.2-73.4]	Negative	-0.5[-0.9342--0.1291]	0.00963014	1
1	238970945	rs71644950	EIRA	non-risk	G	T	G	124	36	133	401	243	106	726	432	5.89[3.97-8.74]	1.15[0.75-1.75]	8.21[5.28-12.7]	Negative	-0.4[-0.7899--0.0458]	0.0276816	1	1	238970945	rs71644950	NARAC	non-risk	G	T	G	168	6	18	480	198	114	576	424	31.4[13.4-73.6]	1.09[0.41-2.88]	46.0[19.1-110.]	Negative	-0.4[-0.9158--0.0142]	0.0431897	1
1	238970962	rs71644951	EIRA	non-risk	G	C	G	124	36	133	401	243	106	726	432	5.89[3.97-8.74]	1.15[0.75-1.75]	8.21[5.28-12.7]	Negative	-0.4[-0.7899--0.0458]	0.0276816	1	1	238970962	rs71644951	NARAC	non-risk	G	C	G	168	6	18	480	198	114	576	424	31.4[13.4-73.6]	1.09[0.41-2.88]	46.0[19.1-110.]	Negative	-0.4[-0.9158--0.0142]	0.0431897	1
15	90379843	rs8030857	EIRA	risk	T	C	C	120	29	136	393	197	137	757	386	8.30[5.42-12.7]	1.43[0.91-2.26]	6.04[3.80-9.59]	Positive	0.21[0.02410-0.41543]	0.027705	1	15	90379843	rs8030857	NARAC	risk	T	C	T	483	18	6	165	544	424	230	114	45.4[26.2-78.8]	1.08[0.41-2.85]	29.1[17.5-48.5]	Positive	0.35[0.16469-0.54756]	0.000266086	0.508256
18	43234904	rs949022	EIRA	risk	G	A	G	395	123	48	138	686	410	293	134	7.16[5.36-9.57]	1.12[0.76-1.65]	5.46[4.30-6.93]	Positive	0.22[0.02413-0.41649]	0.0277276	1	18	43234904	rs949022	NARAC	risk	G	A	G	451	14	10	197	528	396	246	142	47.9[26.4-87.1]	1.77[0.75-4.18]	36.1[20.4-63.6]	Positive	0.23[0.01136-0.45100]	0.0392747	1
8	136831365	rs12334759	EIRA	non-risk	C	T	T	454	142	28	69	842	448	120	90	4.19[3.00-5.86]	1.30[0.80-2.10]	6.15[4.92-7.69]	Negative	-0.5[-1.0198--0.0590]	0.0277305	1	8	136831365	rs12334759	NARAC	non-risk	C	T	C	369	13	11	279	454	287	320	251	27.7[15.1-50.5]	1.10[0.47-2.56]	39.2[21.5-71.3]	Negative	-0.4[-0.7913--0.0480]	0.0268755	1
15	89249788	rs55932832	EIRA	risk	T	C	T	408	126	39	105	728	430	229	99	7.62[5.58-10.4]	1.22[0.80-1.85]	5.59[4.42-7.07]	Positive	0.23[0.02591-0.44791]	0.0277547	1	15	89249788	rs55932832	NARAC	risk	T	C	T	511	18	6	137	571	436	203	102	49.1[28.0-86.0]	1.01[0.38-2.65]	28.4[17.1-47.2]	Positive	0.42[0.23607-0.60633]	8.21997e-06	0.0397731
1	218124854	rs12029732	EIRA	non-risk	C	T	T	495	152	16	27	908	488	51	46	3.52[2.26-5.46]	1.87[0.97-3.60]	6.16[4.97-7.63]	Negative	-0.9[-1.8880--0.1091]	0.0277663	1	1	218124854	rs12029732	NARAC	non-risk	C	T	C	280	10	14	368	356	194	418	344	28.4[14.5-55.5]	1.06[0.45-2.50]	41.8[21.2-82.5]	Negative	-0.4[-0.8657--0.0825]	0.0176298	1
7	40885934	rs2876979	EIRA	risk	A	G	A	336	100	70	196	572	351	405	192	7.26[5.46-9.65]	1.21[0.85-1.73]	5.58[4.29-7.25]	Positive	0.20[0.02212-0.38284]	0.0277764	1	7	40885934	rs2876979	NARAC	non-risk	A	G	A	407	15	9	241	474	350	300	188	40.3[22.6-71.5]	1.15[0.48-2.75]	30.5[17.5-53.2]	Positive	0.23[0.03263-0.44400]	0.0231483	1
7	40886576	rs7808121	EIRA	risk	T	C	T	336	100	70	196	572	351	405	192	7.26[5.46-9.65]	1.21[0.85-1.73]	5.58[4.29-7.25]	Positive	0.20[0.02212-0.38284]	0.0277764	1	7	40886576	rs7808121	NARAC	non-risk	T	C	T	407	15	9	241	474	350	300	188	40.3[22.6-71.5]	1.15[0.48-2.75]	30.5[17.5-53.2]	Positive	0.23[0.03263-0.44400]	0.0231483	1
19	46926784	rs892107	EIRA	non-risk	A	G	A	168	37	129	344	307	145	640	376	7.78[5.32-11.3]	1.69[1.12-2.55]	9.84[6.52-14.8]	Negative	-0.3[-0.6669--0.0383]	0.0278525	1	19	46926784	rs892107	NARAC	non-risk	A	G	A	479	11	13	169	572	350	202	188	39.9[20.8-76.7]	3.92[1.67-9.18]	61.8[32.8-116.]	Negative	-0.6[-1.0685--0.1679]	0.00712488	1
2	3286550	rs2694086	EIRA	risk	T	C	T	318	102	66	190	515	316	427	204	6.64[5.01-8.79]	1.08[0.75-1.56]	5.19[3.98-6.77]	Positive	0.20[0.02218-0.38790]	0.0279649	1	2	3286550	rs2694086	NARAC	non-risk	T	C	T	350	12	12	298	396	302	378	236	39.3[21.0-73.3]	1.12[0.48-2.61]	30.0[16.2-55.7]	Positive	0.23[0.03100-0.43346]	0.0236983	1
1	227192477	rs3818694	EIRA	non-risk	T	C	C	507	163	8	25	924	525	53	18	9.27[5.27-16.3]	1.07[0.47-2.44]	5.58[4.53-6.87]	Positive	0.38[0.04210-0.73700]	0.0279842	1	1	227192477	rs3818694	NARAC	non-risk	T	C	T	409	14	10	239	464	345	310	193	41.7[23.1-75.0]	1.20[0.51-2.82]	30.5[17.2-54.1]	Positive	0.26[0.06340-0.46032]	0.0097035	1
13	64970615	rs1340305	EIRA	risk	T	C	C	27	9	161	498	41	35	928	500	5.99[2.77-12.9]	1.03[0.47-2.25]	3.78[1.55-9.19]	Positive	0.36[0.03924-0.68801]	0.0280106	1	13	64970615	rs1340305	NARAC	non-risk	T	C	T	346	14	10	302	420	336	354	202	43.1[23.8-78.0]	1.15[0.49-2.71]	28.7[16.0-51.3]	Positive	0.33[0.15770-0.50242]	0.000174458	0.439597
2	34222354	rs4300809	EIRA	non-risk	A	G	A	291	93	78	238	478	296	492	243	6.41[4.84-8.50]	1.01[0.71-1.43]	5.11[3.88-6.74]	Positive	0.20[0.02156-0.37852]	0.0280298	1	2	34222354	rs4300809	NARAC	risk	A	G	A	372	10	14	276	393	304	381	234	47.4[24.2-92.7]	1.63[0.69-3.83]	36.7[18.9-71.5]	Positive	0.21[0.00703-0.41579]	0.0426132	1
1	227200100	rs4653474	EIRA	non-risk	C	T	T	508	163	8	25	926	526	53	18	9.30[5.28-16.3]	1.08[0.47-2.45]	5.60[4.54-6.89]	Positive	0.38[0.04189-0.73690]	0.0280724	1	1	227200100	rs4653474	NARAC	non-risk	C	T	C	409	14	10	239	464	345	310	193	41.7[23.1-75.0]	1.20[0.51-2.82]	30.5[17.2-54.1]	Positive	0.26[0.06340-0.46032]	0.0097035	1
2	196025032	rs7565353	EIRA	non-risk	G	A	G	330	102	67	186	597	364	363	170	7.08[5.30-9.47]	1.18[0.82-1.69]	5.42[4.18-7.03]	Positive	0.20[0.02237-0.39422]	0.0280978	1	2	196025032	rs7565353	NARAC	non-risk	G	A	G	417	13	11	231	491	358	283	180	45.4[24.6-83.6]	1.41[0.60-3.28]	33.3[18.5-60.1]	Positive	0.25[0.05174-0.45977]	0.0140061	1
18	43244358	rs1001483	EIRA	risk	G	A	G	395	124	47	138	686	409	292	134	7.07[5.29-9.45]	1.08[0.73-1.60]	5.43[4.28-6.88]	Positive	0.22[0.02357-0.41667]	0.0281581	1	18	43244358	rs1001483	NARAC	risk	G	A	G	452	14	10	196	527	396	247	142	48.2[26.5-87.5]	1.79[0.75-4.22]	36.1[20.5-63.7]	Positive	0.23[0.01477-0.45272]	0.0364172	1
10	67082469	rs12415317	EIRA	non-risk	A	T	A	260	73	95	252	452	285	490	237	7.68[5.66-10.4]	1.38[0.97-1.97]	5.78[4.27-7.82]	Positive	0.19[0.02106-0.37392]	0.0282347	1	10	67082469	rs12415317	NARAC	non-risk	A	T	A	292	11	13	356	339	262	435	276	42.5[22.2-81.3]	1.30[0.56-3.04]	31.1[16.2-59.7]	Positive	0.25[0.06892-0.45096]	0.00764842	1
18	43240988	rs4890295	EIRA	risk	T	C	T	396	124	46	136	686	409	292	134	7.09[5.31-9.47]	1.08[0.73-1.60]	5.45[4.29-6.91]	Positive	0.22[0.02344-0.41675]	0.0282576	1	18	43240988	rs4890295	NARAC	risk	T	C	T	452	14	10	196	528	396	246	142	48.0[26.4-87.3]	1.79[0.75-4.22]	36.2[20.5-63.7]	Positive	0.23[0.01099-0.45079]	0.0395899	1
1	238971037	rs71644952	EIRA	non-risk	A	G	A	124	36	133	401	243	106	727	432	5.90[3.98-8.75]	1.15[0.75-1.75]	8.21[5.28-12.7]	Negative	-0.4[-0.7869--0.0441]	0.0283012	1	1	238971037	rs71644952	NARAC	non-risk	A	G	A	168	6	18	480	198	114	576	424	31.4[13.4-73.6]	1.09[0.41-2.88]	46.0[19.1-110.]	Negative	-0.4[-0.9158--0.0142]	0.0431897	1
18	43245626	rs7229972	EIRA	risk	T	C	T	395	124	47	138	687	408	291	133	7.10[5.32-9.49]	1.08[0.73-1.60]	5.45[4.29-6.91]	Positive	0.22[0.02340-0.41721]	0.0283115	1	18	43245626	rs7229972	NARAC	risk	T	C	T	452	14	10	196	527	396	247	142	48.2[26.5-87.5]	1.79[0.75-4.22]	36.1[20.5-63.7]	Positive	0.23[0.01477-0.45272]	0.0364172	1
9	93542253	rs291003	EIRA	non-risk	C	G	G	27	8	162	502	54	43	921	491	6.37[2.86-14.1]	1.07[0.47-2.42]	4.16[1.71-10.1]	Positive	0.33[0.03549-0.63545]	0.0283858	1	9	93542253	rs291003	NARAC	non-risk	C	G	C	367	13	11	281	437	337	337	201	40.3[22.0-73.9]	1.14[0.49-2.66]	30.2[16.6-54.8]	Positive	0.24[0.04778-0.44491]	0.01503	1
13	75871751	rs4885285	EIRA	non-risk	G	A	G	174	52	115	336	296	197	655	334	6.79[4.83-9.55]	1.18[0.80-1.72]	5.21[3.63-7.48]	Positive	0.20[0.02182-0.39082]	0.028389	1	13	75871751	rs4885285	NARAC	risk	G	A	G	225	6	18	423	253	215	521	323	51.6[22.1-120.]	1.68[0.64-4.40]	37.7[16.0-88.9]	Positive	0.25[0.05762-0.45344]	0.011382	1
4	39619870	rs12500234	EIRA	risk	G	T	G	183	56	115	350	313	204	664	337	6.56[4.72-9.13]	1.08[0.74-1.56]	5.13[3.62-7.29]	Positive	0.20[0.02166-0.38909]	0.0284426	1	4	39619870	rs12500234	NARAC	non-risk	G	T	G	238	8	16	410	269	205	505	333	37.4[17.8-78.6]	1.09[0.45-2.66]	28.9[13.6-61.3]	Positive	0.22[0.01813-0.43217]	0.0330312	1
8	90608246	rs1510470	EIRA	non-risk	C	T	C	207	44	127	326	372	184	607	360	7.98[5.61-11.3]	1.82[1.23-2.68]	9.71[6.68-14.1]	Negative	-0.3[-0.6033--0.0333]	0.0285793	1	8	90608246	rs1510470	NARAC	non-risk	C	T	C	431	15	9	217	524	331	250	207	26.8[15.1-47.4]	1.09[0.46-2.61]	37.3[21.4-64.9]	Negative	-0.3[-0.7716--0.0173]	0.0403267	1
12	126593429	rs10847091	EIRA	non-risk	T	C	C	32	8	161	497	30	26	939	514	7.20[3.29-15.7]	1.25[0.56-2.77]	4.21[1.64-10.8]	Positive	0.37[0.03975-0.71991]	0.0285867	1	12	126593429	rs10847091	NARAC	non-risk	T	C	T	441	15	9	207	514	390	260	148	41.3[23.1-73.8]	1.14[0.47-2.71]	30.7[17.7-53.3]	Positive	0.25[0.03908-0.46612]	0.0204093	1
18	43235882	rs900973	EIRA	risk	T	G	T	396	124	47	137	687	410	292	134	7.09[5.31-9.47]	1.09[0.74-1.62]	5.44[4.29-6.89]	Positive	0.21[0.02290-0.41617]	0.0286477	1	18	43235882	rs900973	NARAC	risk	T	G	T	451	14	10	197	528	396	246	142	47.9[26.4-87.1]	1.77[0.75-4.18]	36.1[20.4-63.6]	Positive	0.23[0.01136-0.45100]	0.0392747	1
18	43236138	rs923074	EIRA	risk	A	C	A	396	124	47	137	687	410	292	134	7.09[5.31-9.47]	1.09[0.74-1.62]	5.44[4.29-6.89]	Positive	0.21[0.02290-0.41617]	0.0286477	1	18	43236138	rs923074	NARAC	risk	A	C	A	451	14	10	197	528	396	246	142	47.9[26.4-87.1]	1.77[0.75-4.18]	36.1[20.4-63.6]	Positive	0.23[0.01136-0.45100]	0.0392747	1
1	238972808	rs12755579	EIRA	non-risk	A	C	A	113	31	125	391	228	99	701	419	6.23[4.09-9.48]	1.17[0.74-1.84]	8.73[5.47-13.9]	Negative	-0.4[-0.8157--0.0448]	0.0286529	1	1	238972808	rs12755579	NARAC	non-risk	A	C	A	168	6	18	480	197	114	577	424	31.5[13.4-73.7]	1.09[0.41-2.88]	45.8[19.0-110.]	Negative	-0.4[-0.9043--0.0076]	0.0461993	1
1	96144179	rs600353	EIRA	risk	G	A	G	469	153	17	51	832	479	118	48	7.75[5.27-11.3]	1.05[0.59-1.88]	5.41[4.36-6.72]	Positive	0.29[0.03062-0.55687]	0.0286587	1	1	96144179	rs600353	NARAC	non-risk	G	A	G	532	17	7	116	641	456	133	82	49.7[27.5-89.8]	2.00[0.78-5.11]	35.5[21.2-59.6]	Positive	0.26[0.00993-0.52015]	0.0417135	1
9	123479210	rs10984995	EIRA	risk	C	T	C	257	83	85	256	436	268	522	259	6.35[4.74-8.49]	1.01[0.71-1.44]	5.05[3.77-6.77]	Positive	0.20[0.02097-0.38140]	0.0286617	1	9	123479210	rs10984995	NARAC	non-risk	C	T	C	319	9	15	329	357	277	417	261	54.0[26.6-109.]	1.96[0.82-4.67]	39.7[19.6-80.3]	Positive	0.24[0.05317-0.43946]	0.0124332	1
13	97548007	rs7339219	EIRA	non-risk	A	G	G	117	36	133	413	198	135	764	399	6.32[4.25-9.39]	1.04[0.68-1.59]	4.82[3.12-7.47]	Positive	0.22[0.02377-0.43421]	0.0287349	1	13	97548007	rs7339219	NARAC	risk	A	G	G	507	18	6	141	566	424	208	114	40.6[23.4-70.3]	1.13[0.42-3.01]	30.8[18.6-51.2]	Positive	0.23[0.00507-0.46886]	0.0451857	1
1	20946239	rs4655230	EIRA	non-risk	G	C	C	465	150	19	56	857	453	95	78	3.79[2.66-5.41]	1.07[0.61-1.87]	6.00[4.82-7.46]	Negative	-0.6[-1.1377--0.0622]	0.0287433	1	1	20946239	rs4655230	NARAC	risk	G	C	G	326	12	12	322	440	271	334	267	25.7[13.8-48.0]	1.01[0.43-2.34]	39.4[21.2-73.4]	Negative	-0.5[-0.9342--0.1291]	0.00963014	1
13	65196065	rs9540170	EIRA	non-risk	G	A	A	497	151	20	36	909	486	70	58	4.00[2.69-5.93]	1.82[1.02-3.25]	6.26[5.05-7.76]	Negative	-0.7[-1.4622--0.0798]	0.0287748	1	13	65196065	rs9540170	NARAC	non-risk	G	A	G	318	11	13	330	406	247	368	291	28.7[15.0-54.7]	1.16[0.50-2.69]	42.3[22.1-80.7]	Negative	-0.4[-0.8639--0.0909]	0.0154676	1
11	9985033	rs7933475	EIRA	non-risk	T	A	A	103	33	138	421	151	104	821	432	6.09[4.04-9.19]	1.03[0.66-1.59]	4.56[2.86-7.28]	Positive	0.24[0.02546-0.46628]	0.0287833	1	11	9985033	rs7933475	NARAC	non-risk	T	A	T	206	6	18	442	225	175	549	363	41.6[17.9-96.7]	1.26[0.48-3.30]	31.1[13.1-73.4]	Positive	0.24[0.03617-0.45543]	0.0215497	1
10	30641459	rs1781279	EIRA	risk	T	C	T	250	66	101	269	428	275	530	257	7.91[5.79-10.8]	1.40[0.98-2.01]	5.96[4.36-8.15]	Positive	0.19[0.02011-0.37070]	0.0288934	1	10	30641459	rs1781279	NARAC	non-risk	T	C	T	283	10	14	365	320	260	454	278	40.2[20.5-78.8]	1.18[0.50-2.78]	30.0[15.2-59.1]	Positive	0.24[0.05328-0.44425]	0.0126224	1
15	42365866	rs1668574	EIRA	risk	A	G	A	423	133	35	109	755	444	219	98	7.21[5.29-9.84]	1.01[0.65-1.56]	5.48[4.36-6.90]	Positive	0.23[0.02441-0.45033]	0.0289076	1	15	42365866	rs1668574	NARAC	non-risk	A	G	A	525	17	7	123	637	458	137	80	52.3[28.9-94.6]	2.16[0.84-5.52]	35.9[21.4-60.3]	Positive	0.29[0.04432-0.53755]	0.0207612	1
9	137311400	rs4240705	EIRA	non-risk	G	A	A	448	144	27	85	842	487	137	57	7.58[5.27-10.9]	1.00[0.62-1.62]	5.49[4.40-6.84]	Positive	0.27[0.02821-0.52227]	0.02897	1	9	137311400	rs4240705	NARAC	risk	G	A	G	262	9	15	386	283	240	491	298	37.7[18.6-76.5]	1.11[0.46-2.65]	29.5[14.4-60.5]	Positive	0.21[0.00494-0.42226]	0.0448097	1
2	60493062	rs4672374	EIRA	non-risk	T	C	C	126	37	131	402	182	125	771	401	6.56[4.45-9.67]	1.09[0.71-1.65]	4.95[3.21-7.64]	Positive	0.23[0.02349-0.43896]	0.0291324	1	2	60493062	rs4672374	NARAC	non-risk	T	C	C	474	16	8	174	575	429	199	109	44.9[25.1-80.3]	1.18[0.48-2.88]	31.1[18.2-53.1]	Positive	0.30[0.08563-0.52144]	0.00632938	1
1	238967586	rs12755694	EIRA	non-risk	A	G	A	124	36	132	400	242	106	725	432	5.88[3.97-8.72]	1.14[0.75-1.75]	8.17[5.26-12.7]	Negative	-0.4[-0.7840--0.0419]	0.0291485	1	1	238967586	rs12755694	NARAC	non-risk	A	G	A	168	6	18	480	198	114	576	424	31.4[13.4-73.6]	1.09[0.41-2.88]	46.0[19.1-110.]	Negative	-0.4[-0.9158--0.0142]	0.0431897	1
3	186143168	rs73885897	EIRA	non-risk	G	T	G	357	114	53	157	622	374	303	145	6.80[5.08-9.10]	1.07[0.73-1.56]	5.25[4.10-6.74]	Positive	0.21[0.02190-0.41054]	0.0291859	1	3	186143168	rs73885897	NARAC	non-risk	G	T	G	402	13	11	246	492	367	282	171	46.9[25.4-86.5]	1.37[0.58-3.19]	32.4[18.0-58.5]	Positive	0.30[0.10620-0.49380]	0.00241287	1
9	123480600	rs2416797	EIRA	risk	C	A	C	257	83	85	255	436	268	522	259	6.34[4.74-8.49]	1.02[0.71-1.45]	5.05[3.77-6.77]	Positive	0.20[0.02031-0.38094]	0.0291956	1	9	123480600	rs2416797	NARAC	non-risk	C	A	C	319	9	15	329	357	277	417	261	54.0[26.6-109.]	1.96[0.82-4.67]	39.7[19.6-80.3]	Positive	0.24[0.05317-0.43946]	0.0124332	1
9	123480603	rs2416798	EIRA	risk	C	T	C	257	83	85	255	436	268	522	259	6.34[4.74-8.49]	1.02[0.71-1.45]	5.05[3.77-6.77]	Positive	0.20[0.02031-0.38094]	0.0291956	1	9	123480603	rs2416798	NARAC	non-risk	C	T	C	319	9	15	329	357	277	417	261	54.0[26.6-109.]	1.96[0.82-4.67]	39.7[19.6-80.3]	Positive	0.24[0.05317-0.43946]	0.0124332	1
9	123480696	rs4617229	EIRA	risk	A	G	A	257	83	85	255	436	268	522	259	6.34[4.74-8.49]	1.02[0.71-1.45]	5.05[3.77-6.77]	Positive	0.20[0.02031-0.38094]	0.0291956	1	9	123480696	rs4617229	NARAC	non-risk	A	G	A	319	9	15	329	357	277	417	261	54.0[26.6-109.]	1.96[0.82-4.67]	39.7[19.6-80.3]	Positive	0.24[0.05317-0.43946]	0.0124332	1
12	48914345	rs7136818	EIRA	risk	G	A	G	305	96	69	211	521	317	426	209	6.60[4.96-8.78]	1.02[0.72-1.47]	5.23[3.99-6.85]	Positive	0.20[0.02053-0.38513]	0.0292024	1	12	48914345	rs7136818	NARAC	non-risk	G	A	G	358	13	11	290	400	310	374	228	43.7[23.9-79.9]	1.38[0.59-3.21]	32.0[17.6-58.1]	Positive	0.25[0.06644-0.45007]	0.00831515	1
2	129182374	rs7562144	EIRA	non-risk	G	C	G	262	79	88	267	429	269	542	271	6.82[5.08-9.15]	1.10[0.78-1.57]	5.37[3.99-7.22]	Positive	0.19[0.01992-0.37468]	0.0292429	1	2	129182374	rs7562144	NARAC	non-risk	G	C	G	318	11	13	330	364	265	410	273	42.8[22.4-81.5]	1.35[0.58-3.14]	32.4[17.0-61.8]	Positive	0.23[0.03430-0.43263]	0.0215845	1
2	18099450	rs1461950	EIRA	risk	A	T	A	299	90	81	226	529	325	439	209	7.07[5.29-9.45]	1.18[0.83-1.67]	5.48[4.16-7.21]	Positive	0.19[0.02013-0.37876]	0.0292479	1	2	18099450	rs1461950	NARAC	non-risk	A	T	A	398	10	14	250	468	340	306	198	59.5[30.3-117.]	2.47[1.05-5.79]	43.8[22.6-84.9]	Positive	0.23[0.03366-0.44331]	0.0224821	1
1	218150399	rs6668428	EIRA	non-risk	G	A	A	406	121	44	111	757	396	194	135	4.86[3.60-6.57]	1.33[0.88-2.00]	6.51[5.13-8.27]	Negative	-0.4[-0.7748--0.0408]	0.0293996	1	1	218150399	rs6668428	NARAC	risk	G	A	G	471	17	7	177	582	363	192	175	24.8[14.3-43.0]	1.12[0.44-2.83]	37.2[22.1-62.8]	Negative	-0.5[-0.9326--0.0777]	0.0205349	1
10	30619462	rs11007990	EIRA	non-risk	A	G	A	151	40	125	362	235	160	717	365	7.48[5.15-10.8]	1.28[0.85-1.93]	5.61[3.74-8.41]	Positive	0.21[0.02119-0.40326]	0.0294461	1	10	30619462	rs11007990	NARAC	non-risk	A	G	A	196	6	18	452	214	175	560	363	43.3[18.5-101.]	1.34[0.51-3.53]	32.3[13.5-77.0]	Positive	0.24[0.03446-0.45727]	0.0226329	1
7	40883310	rs4720378	EIRA	risk	C	G	C	336	101	70	195	572	351	402	191	7.17[5.39-9.52]	1.20[0.84-1.72]	5.52[4.25-7.17]	Positive	0.20[0.01994-0.38231]	0.0295738	1	7	40883310	rs4720378	NARAC	non-risk	C	G	C	406	15	9	242	474	350	300	188	40.2[22.6-71.5]	1.15[0.48-2.74]	30.5[17.4-53.2]	Positive	0.23[0.03269-0.44399]	0.023109	1
14	39955162	rs1950330	EIRA	non-risk	G	A	G	329	99	72	204	577	352	402	192	7.05[5.30-9.37]	1.15[0.80-1.63]	5.47[4.21-7.12]	Positive	0.20[0.02000-0.38373]	0.0295851	1	14	39955162	rs1950330	NARAC	non-risk	G	A	G	371	10	14	277	427	329	347	209	52.3[26.6-102.]	1.92[0.82-4.51]	39.7[20.4-77.2]	Positive	0.22[0.02125-0.42616]	0.0303302	1
14	39956027	rs1950331	EIRA	non-risk	A	T	A	329	99	72	204	577	352	402	192	7.05[5.30-9.37]	1.15[0.80-1.63]	5.47[4.21-7.12]	Positive	0.20[0.02000-0.38373]	0.0295851	1	14	39956027	rs1950331	NARAC	non-risk	A	T	A	371	10	14	277	427	329	347	209	52.3[26.6-102.]	1.92[0.82-4.51]	39.7[20.4-77.2]	Positive	0.22[0.02125-0.42616]	0.0303302	1
14	39956230	rs1950333	EIRA	non-risk	T	G	T	329	99	72	204	577	352	402	192	7.05[5.30-9.37]	1.15[0.80-1.63]	5.47[4.21-7.12]	Positive	0.20[0.02000-0.38373]	0.0295851	1	14	39956230	rs1950333	NARAC	non-risk	T	G	T	371	10	14	277	427	329	347	209	52.3[26.6-102.]	1.92[0.82-4.51]	39.7[20.4-77.2]	Positive	0.22[0.02125-0.42616]	0.0303302	1
14	39957437	rs1955726	EIRA	non-risk	A	C	A	329	99	72	204	577	352	402	192	7.05[5.30-9.37]	1.15[0.80-1.63]	5.47[4.21-7.12]	Positive	0.20[0.02000-0.38373]	0.0295851	1	14	39957437	rs1955726	NARAC	non-risk	A	C	A	371	10	14	277	427	329	347	209	52.3[26.6-102.]	1.92[0.82-4.51]	39.7[20.4-77.2]	Positive	0.22[0.02125-0.42616]	0.0303302	1
5	106884096	rs459400	EIRA	risk	C	T	C	162	47	121	365	283	186	687	351	6.82[4.80-9.69]	1.13[0.76-1.66]	5.28[3.63-7.68]	Positive	0.20[0.02050-0.39357]	0.0295989	1	5	106884096	rs459400	NARAC	non-risk	C	T	C	226	8	16	422	244	209	530	329	39.6[18.8-83.5]	1.14[0.47-2.79]	27.9[13.1-59.7]	Positive	0.29[0.09708-0.48374]	0.00323702	1
1	218135956	rs7555731	EIRA	non-risk	C	A	A	416	124	45	110	766	402	199	138	4.92[3.65-6.62]	1.38[0.92-2.06]	6.51[5.14-8.25]	Negative	-0.4[-0.7635--0.0394]	0.0297165	1	1	218135956	rs7555731	NARAC	risk	C	A	C	470	17	7	178	583	363	191	175	24.8[14.3-43.1]	1.15[0.45-2.92]	37.6[22.3-63.4]	Negative	-0.5[-0.9512--0.0884]	0.0181733	1
1	20948405	rs34347249	EIRA	non-risk	G	A	A	472	150	20	57	873	460	98	79	3.93[2.77-5.58]	1.12[0.65-1.94]	6.10[4.91-7.58]	Negative	-0.5[-1.1108--0.0574]	0.0297324	1	1	20948405	rs34347249	NARAC	risk	G	A	G	326	12	12	322	440	271	334	267	25.7[13.8-48.0]	1.01[0.43-2.34]	39.4[21.2-73.4]	Negative	-0.5[-0.9342--0.1291]	0.00963014	1
14	39961944	rs12886696	EIRA	non-risk	A	T	A	329	99	71	204	577	352	399	191	7.03[5.29-9.35]	1.13[0.79-1.61]	5.47[4.21-7.12]	Positive	0.20[0.01981-0.38427]	0.0297721	1	14	39961944	rs12886696	NARAC	non-risk	A	T	A	371	10	14	277	426	332	348	206	53.5[27.2-105.]	1.92[0.82-4.52]	39.1[20.1-76.2]	Positive	0.25[0.05559-0.44666]	0.0118252	1
9	16914835	rs10810671	EIRA	non-risk	C	A	C	298	84	86	230	566	283	406	254	5.76[4.31-7.71]	1.32[0.93-1.88]	7.26[5.47-9.64]	Negative	-0.3[-0.6007--0.0309]	0.0297779	1	9	16914835	rs10810671	NARAC	non-risk	C	A	C	368	13	11	280	432	260	342	278	28.0[15.4-51.0]	1.07[0.46-2.50]	38.6[21.2-70.2]	Negative	-0.3[-0.7385--0.0206]	0.0381764	1
18	43241826	rs7226515	EIRA	risk	A	G	A	396	124	47	137	686	409	292	134	7.09[5.31-9.47]	1.09[0.74-1.62]	5.44[4.29-6.90]	Positive	0.21[0.02136-0.41529]	0.0298115	1	18	43241826	rs7226515	NARAC	risk	A	G	A	452	14	10	196	528	396	246	142	48.0[26.4-87.3]	1.79[0.75-4.22]	36.2[20.5-63.7]	Positive	0.23[0.01099-0.45079]	0.0395899	1
1	218168729	rs55661858	EIRA	non-risk	C	T	T	501	156	15	30	919	493	51	47	3.43[2.22-5.31]	1.57[0.81-3.02]	6.09[4.93-7.53]	Negative	-0.9[-1.7892--0.0918]	0.0298393	1	1	218168729	rs55661858	NARAC	non-risk	C	T	C	268	10	14	380	343	192	431	346	28.2[14.4-55.1]	1.00[0.42-2.35]	39.1[19.8-77.4]	Negative	-0.3[-0.7599--0.0174]	0.0401561	1
3	68613363	rs1511886	EIRA	risk	T	C	C	53	15	151	469	80	61	879	471	6.59[3.67-11.8]	1.11[0.61-2.04]	4.56[2.34-8.88]	Positive	0.29[0.02818-0.55279]	0.0299602	1	3	68613363	rs1511886	NARAC	risk	T	C	T	328	8	16	320	343	255	431	283	54.2[25.9-113.]	1.99[0.82-4.83]	41.8[19.9-87.8]	Positive	0.21[0.00686-0.41334]	0.0427402	1
14	96060988	rs12894593	EIRA	non-risk	A	T	A	271	80	89	251	504	315	444	214	7.07[5.24-9.54]	1.18[0.83-1.67]	5.48[4.11-7.31]	Positive	0.19[0.01928-0.37867]	0.0299795	1	14	96060988	rs12894593	NARAC	risk	A	T	A	364	13	11	284	370	279	404	259	37.9[20.8-69.1]	1.11[0.48-2.60]	29.9[16.4-54.4]	Positive	0.20[0.00588-0.41046]	0.0436907	1
14	96060983	rs4424857	EIRA	non-risk	C	A	C	271	80	89	251	504	315	444	214	7.07[5.24-9.54]	1.18[0.83-1.67]	5.48[4.11-7.31]	Positive	0.19[0.01928-0.37867]	0.0299795	1	14	96060983	rs4424857	NARAC	risk	C	A	C	364	13	11	284	370	279	404	259	37.9[20.8-69.1]	1.11[0.48-2.60]	29.9[16.4-54.4]	Positive	0.20[0.00588-0.41046]	0.0436907	1
2	3290341	rs62121496	EIRA	risk	A	C	A	320	102	66	190	516	317	422	202	6.66[5.03-8.82]	1.09[0.76-1.57]	5.21[3.99-6.79]	Positive	0.20[0.01964-0.38668]	0.0300186	1	2	3290341	rs62121496	NARAC	non-risk	A	C	A	352	12	12	296	396	303	378	235	39.5[21.2-73.8]	1.13[0.49-2.63]	30.1[16.2-55.8]	Positive	0.23[0.03592-0.43624]	0.0207895	1
7	40876786	rs1921757	EIRA	risk	G	A	G	309	93	74	205	547	340	402	193	7.09[5.30-9.49]	1.21[0.85-1.73]	5.45[4.16-7.14]	Positive	0.20[0.01944-0.38378]	0.0300672	1	7	40876786	rs1921757	NARAC	non-risk	G	A	G	378	14	10	270	435	334	339	204	41.9[23.2-75.5]	1.12[0.48-2.63]	28.9[16.2-51.5]	Positive	0.30[0.12252-0.49025]	0.00109005	1
1	227195871	rs10799378	EIRA	non-risk	G	A	A	499	160	8	23	917	521	51	17	9.53[5.34-17.0]	1.17[0.51-2.68]	5.60[4.54-6.91]	Positive	0.39[0.03783-0.74820]	0.0300974	1	1	227195871	rs10799378	NARAC	non-risk	G	A	G	409	14	10	239	464	345	310	193	41.7[23.1-75.0]	1.20[0.51-2.82]	30.5[17.2-54.1]	Positive	0.26[0.06340-0.46032]	0.0097035	1
13	83273581	rs2147633	EIRA	non-risk	T	C	C	422	127	42	105	800	417	170	122	4.71[3.46-6.41]	1.30[0.86-1.97]	6.44[5.10-8.13]	Negative	-0.4[-0.8201--0.0414]	0.0301036	1	13	83273581	rs2147633	NARAC	non-risk	C	T	T	500	18	6	148	609	398	165	140	23.8[13.7-41.1]	1.02[0.38-2.72]	35.6[21.4-59.2]	Negative	-0.4[-0.9491--0.0478]	0.0301399	1
9	610593	rs9299027	EIRA	non-risk	C	G	G	138	35	134	393	263	118	708	425	6.70[4.53-9.91]	1.34[0.88-2.05]	8.89[5.77-13.6]	Negative	-0.3[-0.7219--0.0364]	0.0301216	1	9	610593	rs9299027	NARAC	non-risk	G	C	C	493	14	10	155	604	401	170	137	31.2[17.1-57.0]	2.01[0.85-4.77]	44.2[25.1-77.8]	Negative	-0.4[-0.8781--0.0138]	0.0430715	1
3	71796840	rs2684381	EIRA	risk	A	T	A	204	58	112	313	348	227	610	308	7.24[5.23-10.0]	1.28[0.89-1.85]	5.52[3.93-7.75]	Positive	0.19[0.01893-0.37607]	0.0301737	1	3	71796840	rs2684381	NARAC	non-risk	A	T	A	215	6	18	433	254	207	520	331	49.1[21.1-114.]	1.57[0.60-4.11]	36.0[15.3-84.7]	Positive	0.25[0.05358-0.45342]	0.0129415	1
11	13192444	rs1481872	EIRA	risk	T	G	T	398	125	46	135	705	420	274	124	7.17[5.34-9.64]	1.11[0.75-1.64]	5.48[4.32-6.94]	Positive	0.22[0.02108-0.41965]	0.030203	1	11	13192444	rs1481872	NARAC	risk	T	G	G	157	6	18	491	184	141	590	397	35.2[15.0-82.4]	1.01[0.38-2.66]	25.4[10.6-60.8]	Positive	0.27[0.06372-0.49052]	0.0109196	1
9	123479457	rs7036196	EIRA	risk	A	G	A	257	83	85	256	436	268	521	259	6.32[4.72-8.46]	1.01[0.71-1.44]	5.04[3.76-6.76]	Positive	0.19[0.01910-0.38030]	0.0302118	1	9	123479457	rs7036196	NARAC	non-risk	A	G	A	319	9	15	329	357	277	417	261	54.0[26.6-109.]	1.96[0.82-4.67]	39.7[19.6-80.3]	Positive	0.24[0.05317-0.43946]	0.0124332	1
9	123479621	rs7036766	EIRA	risk	G	A	G	257	83	85	256	436	268	521	259	6.32[4.72-8.46]	1.01[0.71-1.44]	5.04[3.76-6.76]	Positive	0.19[0.01910-0.38030]	0.0302118	1	9	123479621	rs7036766	NARAC	non-risk	G	A	G	319	9	15	329	357	277	417	261	54.0[26.6-109.]	1.96[0.82-4.67]	39.7[19.6-80.3]	Positive	0.24[0.05317-0.43946]	0.0124332	1
14	39964335	rs1950335	EIRA	non-risk	T	C	T	329	100	71	204	580	353	399	191	6.96[5.24-9.25]	1.12[0.79-1.60]	5.43[4.18-7.06]	Positive	0.20[0.01918-0.38387]	0.0302907	1	14	39964335	rs1950335	NARAC	non-risk	T	C	T	371	10	14	277	427	332	347	206	53.3[27.1-104.]	1.92[0.82-4.51]	39.2[20.1-76.3]	Positive	0.24[0.05016-0.44360]	0.0139003	1
13	83273014	rs9575151	EIRA	non-risk	G	T	T	424	128	42	105	800	417	170	122	4.70[3.45-6.39]	1.30[0.86-1.96]	6.42[5.09-8.09]	Negative	-0.4[-0.8194--0.0409]	0.0302943	1	13	83273014	rs9575151	NARAC	non-risk	T	G	G	500	18	6	148	609	398	165	140	23.8[13.7-41.1]	1.02[0.38-2.72]	35.6[21.4-59.2]	Negative	-0.4[-0.9491--0.0478]	0.0301399	1
1	175197884	rs10912916	EIRA	non-risk	A	C	C	456	137	31	68	831	442	128	96	4.58[3.29-6.36]	1.53[0.96-2.44]	6.35[5.07-7.96]	Negative	-0.5[-0.9609--0.0473]	0.030518	1	1	175197884	rs10912916	NARAC	non-risk	A	C	A	406	11	13	242	486	318	288	220	34.6[18.1-66.1]	1.72[0.74-4.00]	46.6[24.6-88.1]	Negative	-0.3[-0.7266--0.0091]	0.0444174	1
2	196022688	rs2203057	EIRA	non-risk	A	C	A	368	116	50	144	659	401	287	134	6.94[5.16-9.32]	1.11[0.75-1.63]	5.31[4.16-6.79]	Positive	0.21[0.02043-0.41548]	0.0305602	1	2	196022688	rs2203057	NARAC	non-risk	A	C	A	458	16	8	190	553	400	221	138	42.3[23.8-75.1]	1.18[0.48-2.89]	31.2[18.3-53.3]	Positive	0.25[0.03790-0.47823]	0.0215951	1
2	196042024	rs72915824	EIRA	non-risk	T	C	T	371	118	45	132	665	405	254	119	6.92[5.11-9.37]	1.08[0.73-1.62]	5.27[4.13-6.73]	Positive	0.22[0.02112-0.42966]	0.0305643	1	2	196042024	rs72915824	NARAC	non-risk	T	C	T	458	16	8	190	552	400	222	138	43.0[24.2-76.3]	1.18[0.48-2.89]	31.1[18.2-53.1]	Positive	0.27[0.05682-0.48872]	0.0132969	1
6	116807051	rs17077996	EIRA	risk	C	T	T	66	15	153	448	96	74	849	450	8.28[4.66-14.7]	1.46[0.81-2.65]	5.65[2.98-10.7]	Positive	0.26[0.02423-0.49713]	0.0307044	1	6	116807051	rs17077996	NARAC	non-risk	C	T	C	264	10	14	384	305	240	469	298	37.1[18.9-72.8]	1.08[0.46-2.55]	29.2[14.8-57.8]	Positive	0.20[0.00088-0.41808]	0.0490292	1
6	116808418	rs34900657	EIRA	risk	G	T	T	66	15	153	448	96	74	849	450	8.28[4.66-14.7]	1.46[0.81-2.65]	5.65[2.98-10.7]	Positive	0.26[0.02423-0.49713]	0.0307044	1	6	116808418	rs34900657	NARAC	non-risk	G	T	G	264	10	14	384	305	240	469	298	37.1[18.9-72.8]	1.08[0.46-2.55]	29.2[14.8-57.8]	Positive	0.20[0.00088-0.41808]	0.0490292	1
3	71801992	rs2594110	EIRA	risk	C	G	C	202	56	112	311	346	227	607	307	7.39[5.32-10.2]	1.32[0.91-1.91]	5.61[3.98-7.90]	Positive	0.19[0.01822-0.37501]	0.0307576	1	3	71801992	rs2594110	NARAC	non-risk	C	G	C	214	6	18	434	251	207	523	331	49.3[21.2-114.]	1.57[0.60-4.10]	35.6[15.1-83.6]	Positive	0.26[0.07000-0.46325]	0.00786494	1
17	11620993	rs11651009	EIRA	non-risk	A	G	A	368	116	55	165	636	383	343	161	6.90[5.20-9.16]	1.08[0.74-1.56]	5.39[4.21-6.90]	Positive	0.20[0.01917-0.39502]	0.0307697	1	17	11620993	rs11651009	NARAC	non-risk	A	G	A	441	14	10	207	512	380	262	158	45.9[25.3-83.4]	1.30[0.55-3.07]	31.7[18.0-56.1]	Positive	0.30[0.10304-0.50019]	0.00290936	1
9	123481516	rs10984998	EIRA	risk	G	C	G	257	83	85	255	436	268	521	259	6.32[4.72-8.46]	1.01[0.71-1.44]	5.04[3.76-6.76]	Positive	0.19[0.01843-0.37983]	0.0307717	1	9	123481516	rs10984998	NARAC	non-risk	G	C	G	319	9	15	329	357	277	417	261	54.0[26.6-109.]	1.96[0.82-4.67]	39.7[19.6-80.3]	Positive	0.24[0.05317-0.43946]	0.0124332	1
9	123480866	rs2416799	EIRA	risk	G	T	G	257	83	85	255	436	268	521	259	6.32[4.72-8.46]	1.01[0.71-1.44]	5.04[3.76-6.76]	Positive	0.19[0.01843-0.37983]	0.0307717	1	9	123480866	rs2416799	NARAC	non-risk	G	T	G	319	9	15	329	357	277	417	261	54.0[26.6-109.]	1.96[0.82-4.67]	39.7[19.6-80.3]	Positive	0.24[0.05317-0.43946]	0.0124332	1
9	123480369	rs3904196	EIRA	risk	T	C	T	257	83	85	255	436	268	521	259	6.32[4.72-8.46]	1.01[0.71-1.44]	5.04[3.76-6.76]	Positive	0.19[0.01843-0.37983]	0.0307717	1	9	123480369	rs3904196	NARAC	non-risk	T	C	T	319	9	15	329	357	277	417	261	54.0[26.6-109.]	1.96[0.82-4.67]	39.7[19.6-80.3]	Positive	0.24[0.05317-0.43946]	0.0124332	1
1	102573781	rs11164381	EIRA	risk	A	T	T	407	118	48	120	710	426	246	108	8.02[5.90-10.9]	1.36[0.92-2.02]	5.83[4.59-7.40]	Positive	0.22[0.02108-0.43484]	0.0307884	1	1	102573781	rs11164381	NARAC	non-risk	A	T	T	480	14	10	168	575	419	199	119	53.1[28.9-97.7]	2.18[0.92-5.14]	38.6[21.9-68.1]	Positive	0.24[0.01977-0.48012]	0.0333018	1
18	43245315	rs1123604	EIRA	risk	G	T	G	396	124	47	137	687	409	292	134	7.09[5.31-9.47]	1.09[0.74-1.62]	5.45[4.30-6.91]	Positive	0.21[0.02009-0.41449]	0.0307967	1	18	43245315	rs1123604	NARAC	risk	G	T	G	452	14	10	196	527	396	247	142	48.2[26.5-87.5]	1.79[0.75-4.22]	36.1[20.5-63.7]	Positive	0.23[0.01477-0.45272]	0.0364172	1
9	123440889	rs2120228	EIRA	risk	A	T	A	265	84	87	266	445	276	533	268	6.38[4.78-8.51]	1.01[0.71-1.44]	5.10[3.82-6.82]	Positive	0.19[0.01818-0.37527]	0.0307984	1	9	123440889	rs2120228	NARAC	non-risk	A	T	A	322	9	15	326	364	281	410	257	53.3[26.3-107.]	1.95[0.82-4.64]	40.0[19.8-80.9]	Positive	0.23[0.03312-0.42805]	0.0220946	1
7	154232976	rs11975187	EIRA	risk	G	A	A	445	136	29	73	821	436	131	100	4.42[3.19-6.12]	1.32[0.82-2.12]	6.27[5.00-7.86]	Negative	-0.4[-0.9383--0.0454]	0.0308014	1	7	154232976	rs11975187	NARAC	non-risk	G	A	G	413	10	14	235	522	338	252	200	42.4[21.5-83.3]	2.68[1.14-6.30]	56.1[28.9-108.]	Negative	-0.3[-0.7282--0.0004]	0.0497189	1
14	96061039	rs8019640	EIRA	non-risk	C	T	C	271	80	89	252	504	315	443	214	7.06[5.23-9.52]	1.17[0.83-1.67]	5.48[4.11-7.31]	Positive	0.19[0.01828-0.37813]	0.0308358	1	14	96061039	rs8019640	NARAC	risk	C	T	C	364	13	11	284	370	279	404	259	37.9[20.8-69.1]	1.11[0.48-2.60]	29.9[16.4-54.4]	Positive	0.20[0.00588-0.41046]	0.0436907	1
15	90376800	rs12197	EIRA	risk	A	G	G	120	29	137	396	195	135	763	389	8.30[5.42-12.7]	1.43[0.91-2.26]	6.06[3.81-9.63]	Positive	0.21[0.01998-0.41372]	0.0308523	1	15	90376800	rs12197	NARAC	risk	A	G	A	479	18	6	169	541	422	233	116	45.1[26.0-78.1]	1.07[0.40-2.80]	29.0[17.4-48.3]	Positive	0.35[0.16387-0.54562]	0.000269763	0.508256
14	39928462	rs12050477	EIRA	non-risk	G	C	G	326	96	71	201	577	352	393	187	7.24[5.43-9.66]	1.17[0.82-1.68]	5.60[4.30-7.30]	Positive	0.20[0.01858-0.38480]	0.0308566	1	14	39928462	rs12050477	NARAC	non-risk	G	C	G	368	10	14	280	426	329	348	209	52.2[26.6-102.]	1.90[0.81-4.47]	39.4[20.2-76.8]	Positive	0.22[0.02553-0.42847]	0.0272121	1
5	57057436	rs2160056	EIRA	risk	T	C	C	399	123	41	120	702	415	251	113	7.27[5.37-9.84]	1.07[0.70-1.61]	5.55[4.38-7.05]	Positive	0.22[0.02073-0.43120]	0.0309244	1	5	57057436	rs2160056	NARAC	risk	T	C	C	509	16	8	139	570	431	204	107	49.3[27.5-88.1]	2.11[0.86-5.17]	36.5[21.4-62.4]	Positive	0.23[0.00181-0.46951]	0.0482403	1
5	57057288	rs35043723	EIRA	risk	A	G	G	399	123	41	120	702	415	251	113	7.27[5.37-9.84]	1.07[0.70-1.61]	5.55[4.38-7.05]	Positive	0.22[0.02073-0.43120]	0.0309244	1	5	57057288	rs35043723	NARAC	risk	A	G	G	509	16	8	139	570	431	204	107	49.3[27.5-88.1]	2.11[0.86-5.17]	36.5[21.4-62.4]	Positive	0.23[0.00181-0.46951]	0.0482403	1
1	210862198	rs28513183	EIRA	non-risk	G	C	C	110	33	136	419	184	127	787	410	6.39[4.25-9.61]	1.06[0.68-1.64]	4.86[3.10-7.63]	Positive	0.22[0.02083-0.43618]	0.0310344	1	1	210862198	rs28513183	NARAC	non-risk	G	C	G	153	6	18	495	185	157	589	381	35.9[15.2-84.5]	1.03[0.39-2.73]	25.9[10.7-62.2]	Positive	0.27[0.06781-0.48710]	0.00948514	1
2	196001440	rs1511274	EIRA	non-risk	C	A	C	374	118	50	144	672	405	285	132	7.00[5.21-9.40]	1.11[0.75-1.63]	5.36[4.20-6.84]	Positive	0.21[0.01984-0.41592]	0.0310545	1	2	196001440	rs1511274	NARAC	non-risk	C	A	C	462	16	8	186	554	401	220	137	42.8[24.1-76.0]	1.21[0.49-2.98]	31.5[18.4-53.8]	Positive	0.25[0.03861-0.47869]	0.0212242	1
2	196006976	rs67603684	EIRA	non-risk	G	C	G	401	128	39	107	724	437	217	98	7.11[5.19-9.73]	1.14[0.75-1.74]	5.28[4.18-6.67]	Positive	0.23[0.02151-0.45137]	0.0310686	1	2	196006976	rs67603684	NARAC	non-risk	G	C	G	505	17	7	143	599	427	175	111	45.8[25.7-81.4]	1.44[0.57-3.66]	33.0[19.6-55.5]	Positive	0.26[0.03527-0.50234]	0.0240691	1
18	49216909	rs1504505	EIRA	non-risk	A	T	T	110	35	136	422	193	131	782	410	6.06[4.06-9.05]	1.00[0.65-1.54]	4.66[2.99-7.26]	Positive	0.22[0.02082-0.43758]	0.0310966	1	18	49216909	rs1504505	NARAC	non-risk	A	T	A	175	6	18	473	226	174	548	364	42.8[18.2-100.]	1.30[0.49-3.42]	31.5[13.2-75.0]	Positive	0.25[0.04896-0.46280]	0.0153591	1
9	16911638	rs4366169	EIRA	non-risk	C	A	C	294	83	86	230	548	272	403	250	5.81[4.34-7.78]	1.32[0.93-1.87]	7.33[5.51-9.76]	Negative	-0.3[-0.6059--0.0287]	0.0311375	1	9	16911638	rs4366169	NARAC	non-risk	C	A	C	369	13	11	279	432	260	342	278	28.0[15.4-51.0]	1.07[0.46-2.50]	38.6[21.2-70.2]	Negative	-0.3[-0.7385--0.0207]	0.0381637	1
9	16911757	rs4445329	EIRA	non-risk	A	G	A	294	83	86	230	548	272	403	250	5.81[4.34-7.78]	1.32[0.93-1.87]	7.33[5.51-9.76]	Negative	-0.3[-0.6059--0.0287]	0.0311375	1	9	16911757	rs4445329	NARAC	non-risk	A	G	A	369	13	11	279	432	260	342	278	28.0[15.4-51.0]	1.07[0.46-2.50]	38.6[21.2-70.2]	Negative	-0.3[-0.7385--0.0207]	0.0381637	1
19	19453560	rs2301669	EIRA	non-risk	C	A	C	216	68	100	291	349	221	591	297	6.41[4.71-8.72]	1.07[0.75-1.53]	5.04[3.65-6.96]	Positive	0.20[0.01827-0.38609]	0.0311773	1	19	19453560	rs2301669	NARAC	risk	C	A	C	286	11	13	362	319	244	455	294	38.0[19.9-72.3]	1.11[0.47-2.57]	29.2[15.2-55.8]	Positive	0.22[0.02669-0.43014]	0.0264621	1
19	19453521	rs2965191	EIRA	non-risk	T	G	T	216	68	100	291	349	221	591	297	6.41[4.71-8.72]	1.07[0.75-1.53]	5.04[3.65-6.96]	Positive	0.20[0.01827-0.38609]	0.0311773	1	19	19453521	rs2965191	NARAC	risk	T	G	T	290	11	13	358	321	247	453	291	38.5[20.2-73.3]	1.12[0.48-2.61]	29.2[15.3-55.9]	Positive	0.23[0.03782-0.43645]	0.0197031	1
5	57057490	rs2110370	EIRA	risk	G	A	A	400	123	41	120	702	415	251	113	7.29[5.38-9.86]	1.07[0.71-1.62]	5.57[4.39-7.06]	Positive	0.22[0.02036-0.43092]	0.0312024	1	5	57057490	rs2110370	NARAC	risk	G	A	A	509	16	8	139	570	431	204	107	49.3[27.5-88.1]	2.11[0.86-5.17]	36.5[21.4-62.4]	Positive	0.23[0.00181-0.46951]	0.0482403	1
1	238969768	rs11590041	EIRA	non-risk	G	A	G	124	36	133	402	241	106	726	432	5.89[3.97-8.74]	1.14[0.75-1.75]	8.14[5.24-12.6]	Negative	-0.4[-0.7751--0.0363]	0.0313481	1	1	238969768	rs11590041	NARAC	non-risk	G	A	G	168	6	18	480	197	114	577	424	31.5[13.4-73.7]	1.09[0.41-2.88]	45.8[19.0-110.]	Negative	-0.4[-0.9043--0.0076]	0.0461993	1
12	10175667	rs11053554	EIRA	non-risk	A	G	G	23	7	160	498	35	31	909	488	6.15[2.61-14.4]	1.04[0.43-2.48]	3.81[1.43-10.1]	Positive	0.37[0.03321-0.71239]	0.0314186	1	12	10175667	rs11053554	NARAC	risk	A	G	A	421	15	9	227	423	346	351	192	41.9[23.7-74.0]	1.00[0.41-2.38]	26.7[15.3-46.6]	Positive	0.36[0.19014-0.53329]	3.59445e-05	0.111179
3	68609673	rs9866302	EIRA	risk	A	G	G	54	15	151	469	80	61	877	470	6.71[3.74-12.0]	1.13[0.62-2.08]	4.65[2.39-9.04]	Positive	0.28[0.02553-0.54933]	0.0314695	1	3	68609673	rs9866302	NARAC	risk	A	G	A	328	8	16	320	343	255	431	283	54.2[25.9-113.]	1.99[0.82-4.83]	41.8[19.9-87.8]	Positive	0.21[0.00686-0.41334]	0.0427402	1
1	181300000	rs58021963	EIRA	risk	A	G	A	431	137	32	99	750	442	223	100	7.11[5.23-9.67]	1.02[0.65-1.59]	5.43[4.33-6.82]	Positive	0.23[0.02066-0.44510]	0.0314896	1	1	181300000	rs58021963	NARAC	non-risk	A	G	A	540	18	6	108	648	473	126	65	48.0[26.5-86.8]	1.42[0.53-3.80]	32.7[19.7-54.1]	Positive	0.30[0.05354-0.56623]	0.0178187	1
9	123474050	rs10760113	EIRA	risk	T	C	T	262	83	86	259	442	272	527	262	6.45[4.82-8.62]	1.03[0.73-1.47]	5.14[3.84-6.88]	Positive	0.19[0.01733-0.37640]	0.0316174	1	9	123474050	rs10760113	NARAC	non-risk	T	C	T	321	9	15	327	359	278	415	260	53.7[26.6-108.]	1.98[0.83-4.70]	40.1[19.8-81.1]	Positive	0.23[0.03965-0.43134]	0.0184303	1
10	58552182	rs1914596	EIRA	non-risk	T	C	T	345	107	59	183	610	366	363	170	6.97[5.24-9.26]	1.04[0.72-1.50]	5.49[4.26-7.08]	Positive	0.20[0.01804-0.39229]	0.0316302	1	10	58552182	rs1914596	NARAC	risk	T	C	T	407	14	10	241	448	339	326	199	40.0[22.2-71.8]	1.19[0.50-2.79]	31.0[17.4-54.9]	Positive	0.22[0.01286-0.42791]	0.0373869	1
2	218641122	rs34064769	EIRA	risk	C	A	C	172	54	112	334	303	196	653	331	6.33[4.53-8.84]	1.04[0.72-1.52]	4.97[3.48-7.11]	Positive	0.20[0.01807-0.39352]	0.031653	1	2	218641122	rs34064769	NARAC	non-risk	C	A	C	179	6	18	469	196	178	578	360	42.1[18.0-98.6]	1.22[0.46-3.22]	27.5[11.5-65.7]	Positive	0.33[0.15225-0.52749]	0.000384332	0.604353
1	218247423	rs6693051	EIRA	non-risk	G	C	G	352	101	63	153	663	340	269	173	5.48[4.08-7.36]	1.46[1.01-2.11]	6.96[5.37-9.01]	Negative	-0.3[-0.6767--0.0310]	0.0316609	1	1	218247423	rs6693051	NARAC	non-risk	G	C	C	527	18	6	121	650	422	124	116	24.4[13.9-42.7]	1.43[0.53-3.82]	37.9[22.8-62.9]	Negative	-0.5[-1.0742--0.0653]	0.0268369	1
8	143813581	rs10103654	EIRA	risk	C	T	C	328	89	75	184	558	349	364	168	8.24[6.10-11.1]	1.52[1.06-2.18]	6.03[4.59-7.92]	Positive	0.20[0.01788-0.39024]	0.0316928	1	8	143813581	rs10103654	NARAC	non-risk	C	T	C	376	13	11	272	439	317	335	221	37.7[20.6-69.0]	1.05[0.45-2.45]	29.7[16.4-53.8]	Positive	0.21[0.00041-0.42063]	0.0495436	1
2	34214050	rs6543794	EIRA	non-risk	A	G	A	293	93	78	238	480	297	491	243	6.44[4.86-8.54]	1.02[0.72-1.44]	5.16[3.91-6.80]	Positive	0.19[0.01717-0.37513]	0.0317073	1	2	34214050	rs6543794	NARAC	risk	A	G	A	372	10	14	276	393	304	381	234	47.4[24.2-92.7]	1.63[0.69-3.83]	36.7[18.9-71.5]	Positive	0.21[0.00703-0.41579]	0.0426132	1
1	175199243	rs12075930	EIRA	non-risk	T	A	A	450	136	31	68	825	440	128	96	4.55[3.28-6.33]	1.52[0.95-2.43]	6.30[5.03-7.90]	Negative	-0.4[-0.9549--0.0435]	0.0317694	1	1	175199243	rs12075930	NARAC	non-risk	T	A	T	406	11	13	242	486	318	288	220	34.6[18.1-66.1]	1.72[0.74-4.00]	46.6[24.6-88.1]	Negative	-0.3[-0.7266--0.0091]	0.0444174	1
1	238965621	rs1474324	EIRA	non-risk	G	A	G	124	36	132	401	241	106	725	432	5.89[3.97-8.73]	1.14[0.74-1.74]	8.13[5.23-12.6]	Negative	-0.4[-0.7736--0.0352]	0.0318032	1	1	238965621	rs1474324	NARAC	non-risk	G	A	G	168	6	18	480	197	114	577	424	31.5[13.4-73.7]	1.09[0.41-2.88]	45.8[19.0-110.]	Negative	-0.4[-0.9043--0.0076]	0.0461993	1
9	16914895	rs7032221	EIRA	non-risk	G	A	G	298	84	87	231	568	284	408	254	5.79[4.33-7.75]	1.33[0.94-1.89]	7.26[5.47-9.63]	Negative	-0.3[-0.5933--0.0269]	0.0318323	1	9	16914895	rs7032221	NARAC	non-risk	G	A	G	368	13	11	280	432	260	342	278	28.0[15.4-51.0]	1.07[0.46-2.50]	38.6[21.2-70.2]	Negative	-0.3[-0.7385--0.0206]	0.0381764	1
9	123481206	rs10984997	EIRA	risk	T	A	T	250	80	82	252	425	261	516	257	6.36[4.73-8.54]	1.00[0.70-1.43]	5.08[3.78-6.84]	Positive	0.19[0.01733-0.38185]	0.0318416	1	9	123481206	rs10984997	NARAC	non-risk	T	A	T	319	9	15	329	357	277	417	261	54.0[26.6-109.]	1.96[0.82-4.67]	39.7[19.6-80.3]	Positive	0.24[0.05317-0.43946]	0.0124332	1
19	19433105	rs7246748	EIRA	non-risk	C	T	C	217	68	100	291	349	221	589	296	6.44[4.73-8.77]	1.07[0.75-1.53]	5.07[3.67-6.99]	Positive	0.20[0.01729-0.38535]	0.0320163	1	19	19433105	rs7246748	NARAC	risk	C	T	C	291	11	13	357	320	247	454	291	38.7[20.3-73.8]	1.13[0.49-2.64]	29.3[15.3-56.0]	Positive	0.24[0.04257-0.43906]	0.0172695	1
8	69905460	rs4327872	EIRA	non-risk	C	T	C	361	115	55	163	668	394	305	141	6.88[5.14-9.21]	1.03[0.71-1.50]	5.38[4.21-6.87]	Positive	0.21[0.01828-0.40850]	0.0320573	1	8	69905460	rs4327872	NARAC	risk	C	T	C	483	15	9	165	514	388	260	150	48.2[27.0-86.1]	1.66[0.69-3.99]	33.8[19.5-58.8]	Positive	0.28[0.08249-0.48621]	0.00576266	1
19	19442434	rs12985655	EIRA	non-risk	G	A	G	216	68	100	291	349	221	589	296	6.41[4.71-8.72]	1.07[0.75-1.53]	5.04[3.65-6.96]	Positive	0.20[0.01708-0.38551]	0.0322141	1	19	19442434	rs12985655	NARAC	risk	G	A	G	290	11	13	358	321	247	453	291	38.5[20.2-73.3]	1.12[0.48-2.61]	29.2[15.3-55.9]	Positive	0.23[0.03782-0.43645]	0.0197031	1
19	19449686	rs2074090	EIRA	non-risk	G	T	G	216	68	100	291	349	221	589	296	6.41[4.71-8.72]	1.07[0.75-1.53]	5.04[3.65-6.96]	Positive	0.20[0.01708-0.38551]	0.0322141	1	19	19449686	rs2074090	NARAC	risk	G	T	G	290	11	13	358	321	247	453	291	38.5[20.2-73.3]	1.12[0.48-2.61]	29.2[15.3-55.9]	Positive	0.23[0.03782-0.43645]	0.0197031	1
18	49218496	rs1394353	EIRA	non-risk	C	G	G	110	35	136	423	193	131	786	413	6.05[4.05-9.03]	1.00[0.65-1.54]	4.67[3.00-7.27]	Positive	0.22[0.01921-0.43654]	0.0323119	1	18	49218496	rs1394353	NARAC	non-risk	C	G	C	175	6	18	473	226	174	548	364	42.8[18.2-100.]	1.30[0.49-3.42]	31.5[13.2-75.0]	Positive	0.25[0.04896-0.46280]	0.0153591	1
18	49218685	rs1394355	EIRA	non-risk	C	T	T	110	35	136	423	193	131	786	413	6.05[4.05-9.03]	1.00[0.65-1.54]	4.67[3.00-7.27]	Positive	0.22[0.01921-0.43654]	0.0323119	1	18	49218685	rs1394355	NARAC	non-risk	C	T	C	175	6	18	473	226	174	548	364	42.8[18.2-100.]	1.30[0.49-3.42]	31.5[13.2-75.0]	Positive	0.25[0.04896-0.46280]	0.0153591	1
18	49217473	rs1630956	EIRA	non-risk	G	A	A	110	35	136	423	193	131	786	413	6.05[4.05-9.03]	1.00[0.65-1.54]	4.67[3.00-7.27]	Positive	0.22[0.01921-0.43654]	0.0323119	1	18	49217473	rs1630956	NARAC	non-risk	G	A	G	175	6	18	473	226	174	548	364	42.8[18.2-100.]	1.30[0.49-3.42]	31.5[13.2-75.0]	Positive	0.25[0.04896-0.46280]	0.0153591	1
22	30289819	rs1807513	EIRA	non-risk	C	A	C	193	57	107	319	352	222	594	299	6.83[4.92-9.48]	1.11[0.77-1.61]	5.34[3.80-7.52]	Positive	0.19[0.01683-0.38262]	0.0323259	1	22	30289819	rs1807513	NARAC	non-risk	C	A	C	225	6	18	423	251	199	523	339	49.0[20.9-114.]	1.59[0.60-4.19]	37.6[15.8-88.9]	Positive	0.22[0.01065-0.43085]	0.0394559	1
9	16910677	rs10738467	EIRA	non-risk	T	C	T	293	83	86	230	547	272	403	250	5.79[4.32-7.76]	1.32[0.93-1.87]	7.29[5.48-9.71]	Negative	-0.3[-0.6026--0.0264]	0.0323715	1	9	16910677	rs10738467	NARAC	non-risk	T	C	T	369	13	11	279	432	260	342	278	28.0[15.4-51.0]	1.07[0.46-2.50]	38.6[21.2-70.2]	Negative	-0.3[-0.7385--0.0207]	0.0381637	1
9	16910763	rs10738468	EIRA	non-risk	G	A	G	293	83	86	230	547	272	403	250	5.79[4.32-7.76]	1.32[0.93-1.87]	7.29[5.48-9.71]	Negative	-0.3[-0.6026--0.0264]	0.0323715	1	9	16910763	rs10738468	NARAC	non-risk	G	A	G	369	13	11	279	432	260	342	278	28.0[15.4-51.0]	1.07[0.46-2.50]	38.6[21.2-70.2]	Negative	-0.3[-0.7385--0.0207]	0.0381637	1
10	30614274	rs10763778	EIRA	non-risk	T	C	T	150	40	125	361	235	159	719	365	7.46[5.13-10.8]	1.28[0.85-1.92]	5.61[3.74-8.42]	Positive	0.20[0.01754-0.40154]	0.0324295	1	10	30614274	rs10763778	NARAC	non-risk	T	C	T	196	6	18	452	214	175	560	363	43.3[18.5-101.]	1.34[0.51-3.53]	32.3[13.5-77.0]	Positive	0.24[0.03446-0.45727]	0.0226329	1
15	42367596	rs810325	EIRA	risk	A	G	A	422	133	35	108	750	444	217	98	7.13[5.22-9.73]	1.02[0.66-1.57]	5.44[4.32-6.84]	Positive	0.23[0.01957-0.44835]	0.0324394	1	15	42367596	rs810325	NARAC	non-risk	A	G	A	525	17	7	123	637	458	137	80	52.3[28.9-94.6]	2.16[0.84-5.52]	35.9[21.4-60.3]	Positive	0.29[0.04432-0.53755]	0.0207612	1
7	40876114	rs12538933	EIRA	risk	T	C	T	309	93	74	205	547	340	401	193	7.08[5.29-9.47]	1.21[0.85-1.73]	5.45[4.16-7.14]	Positive	0.19[0.01662-0.38207]	0.0324917	1	7	40876114	rs12538933	NARAC	non-risk	T	C	T	378	14	10	270	435	334	339	204	41.9[23.2-75.5]	1.12[0.48-2.63]	28.9[16.2-51.5]	Positive	0.30[0.12252-0.49025]	0.00109005	1
7	40876080	rs12538949	EIRA	risk	A	G	A	309	93	74	205	547	340	401	193	7.08[5.29-9.47]	1.21[0.85-1.73]	5.45[4.16-7.14]	Positive	0.19[0.01662-0.38207]	0.0324917	1	7	40876080	rs12538949	NARAC	non-risk	A	G	A	378	14	10	270	435	334	339	204	41.9[23.2-75.5]	1.12[0.48-2.63]	28.9[16.2-51.5]	Positive	0.30[0.12252-0.49025]	0.00109005	1
7	40876155	rs12538965	EIRA	risk	A	G	A	309	93	74	205	547	340	401	193	7.08[5.29-9.47]	1.21[0.85-1.73]	5.45[4.16-7.14]	Positive	0.19[0.01662-0.38207]	0.0324917	1	7	40876155	rs12538965	NARAC	non-risk	A	G	A	378	14	10	270	435	334	339	204	41.9[23.2-75.5]	1.12[0.48-2.63]	28.9[16.2-51.5]	Positive	0.30[0.12252-0.49025]	0.00109005	1
19	57252559	rs62133235	EIRA	non-risk	G	A	A	62	15	154	465	99	76	865	455	7.95[4.46-14.1]	1.36[0.75-2.47]	5.51[2.90-10.4]	Positive	0.26[0.02163-0.49868]	0.0325325	1	19	57252559	rs62133235	NARAC	non-risk	G	A	G	357	13	11	291	428	314	346	224	37.8[20.6-69.3]	1.03[0.44-2.40]	29.2[16.1-53.0]	Positive	0.22[0.02339-0.43105]	0.0288922	1
7	40885663	rs6970936	EIRA	risk	A	G	A	314	93	75	215	550	343	409	198	7.09[5.31-9.46]	1.17[0.82-1.67]	5.50[4.20-7.21]	Positive	0.19[0.01642-0.37962]	0.0325739	1	7	40885663	rs6970936	NARAC	risk	A	G	A	379	14	10	269	435	334	339	204	41.8[23.2-75.4]	1.12[0.48-2.63]	28.9[16.2-51.5]	Positive	0.30[0.12065-0.48916]	0.00118083	1
9	123473416	rs10984992	EIRA	risk	G	A	G	263	83	86	260	441	272	527	263	6.46[4.83-8.63]	1.03[0.73-1.47]	5.15[3.85-6.90]	Positive	0.19[0.01605-0.37542]	0.032749	1	9	123473416	rs10984992	NARAC	non-risk	G	A	G	321	9	15	327	359	278	415	260	53.7[26.6-108.]	1.98[0.83-4.70]	40.1[19.8-81.1]	Positive	0.23[0.03965-0.43134]	0.0184303	1
9	123480378	rs3904197	EIRA	risk	C	T	C	257	83	85	255	436	268	520	259	6.32[4.72-8.46]	1.02[0.71-1.45]	5.05[3.77-6.77]	Positive	0.19[0.01616-0.37839]	0.032771	1	9	123480378	rs3904197	NARAC	non-risk	C	T	C	319	9	15	329	357	277	417	261	54.0[26.6-109.]	1.96[0.82-4.67]	39.7[19.6-80.3]	Positive	0.24[0.05317-0.43946]	0.0124332	1
9	123483559	rs4837792	EIRA	risk	G	A	G	257	83	84	254	435	267	520	259	6.32[4.72-8.45]	1.01[0.71-1.44]	5.05[3.77-6.77]	Positive	0.19[0.01615-0.37876]	0.0327887	1	9	123483559	rs4837792	NARAC	non-risk	G	A	G	319	9	15	329	357	277	417	261	54.0[26.6-109.]	1.96[0.82-4.67]	39.7[19.6-80.3]	Positive	0.24[0.05317-0.43946]	0.0124332	1
14	38150841	rs1957588	EIRA	risk	T	C	C	98	29	141	432	159	113	818	429	6.55[4.25-10.1]	1.10[0.69-1.74]	4.91[3.03-7.95]	Positive	0.23[0.01914-0.44956]	0.0328146	1	14	38150841	rs1957588	NARAC	non-risk	T	C	T	214	6	18	434	219	193	555	345	52.7[22.4-123.]	1.77[0.67-4.66]	39.1[16.4-93.0]	Positive	0.24[0.03500-0.45121]	0.0220394	1
15	89247039	rs73460935	EIRA	risk	C	T	C	406	126	42	121	726	429	249	111	7.37[5.45-9.97]	1.14[0.76-1.71]	5.57[4.40-7.05]	Positive	0.22[0.01830-0.43000]	0.032822	1	15	89247039	rs73460935	NARAC	risk	C	T	C	510	18	6	138	570	436	204	102	49.2[28.1-86.2]	1.01[0.38-2.65]	28.4[17.0-47.2]	Positive	0.42[0.23889-0.60760]	6.80087e-06	0.0384016
14	39950178	rs17109296	EIRA	non-risk	A	T	A	326	96	72	203	577	352	402	192	7.20[5.40-9.59]	1.18[0.82-1.68]	5.59[4.29-7.28]	Positive	0.19[0.01617-0.38075]	0.0328503	1	14	39950178	rs17109296	NARAC	non-risk	A	T	A	371	10	14	277	427	329	347	209	52.3[26.6-102.]	1.92[0.82-4.51]	39.7[20.4-77.2]	Positive	0.22[0.02125-0.42616]	0.0303302	1
14	39946771	rs35708308	EIRA	non-risk	A	G	A	326	96	72	203	577	352	402	192	7.20[5.40-9.59]	1.18[0.82-1.68]	5.59[4.29-7.28]	Positive	0.19[0.01617-0.38075]	0.0328503	1	14	39946771	rs35708308	NARAC	non-risk	A	G	A	371	10	14	277	427	329	347	209	52.3[26.6-102.]	1.92[0.82-4.51]	39.7[20.4-77.2]	Positive	0.22[0.02125-0.42616]	0.0303302	1
19	19439631	rs7247309	EIRA	non-risk	A	T	A	217	68	100	291	349	221	589	296	6.44[4.73-8.76]	1.07[0.75-1.53]	5.07[3.67-7.00]	Positive	0.20[0.01633-0.38467]	0.0328598	1	19	19439631	rs7247309	NARAC	risk	A	T	A	290	11	13	358	320	247	454	291	38.6[20.2-73.4]	1.12[0.48-2.61]	29.1[15.2-55.7]	Positive	0.24[0.04275-0.43938]	0.0171942	1
22	30359410	rs5763646	EIRA	non-risk	C	T	C	191	55	108	309	341	217	597	298	7.00[5.02-9.76]	1.19[0.82-1.73]	5.41[3.83-7.66]	Positive	0.19[0.01619-0.38220]	0.0328868	1	22	30359410	rs5763646	NARAC	non-risk	C	T	C	226	6	18	422	251	198	523	340	49.2[21.0-115.]	1.60[0.60-4.20]	37.3[15.8-88.4]	Positive	0.22[0.02124-0.43708]	0.0307548	1
9	123483668	rs4836830	EIRA	risk	A	G	A	257	83	84	254	435	267	520	259	6.30[4.71-8.44]	1.01[0.71-1.43]	5.05[3.77-6.76]	Positive	0.19[0.01600-0.37871]	0.0329303	1	9	123483668	rs4836830	NARAC	non-risk	A	G	A	319	9	15	329	357	277	417	261	54.0[26.6-109.]	1.96[0.82-4.67]	39.7[19.6-80.3]	Positive	0.24[0.05317-0.43946]	0.0124332	1
20	8678446	rs2295179	EIRA	non-risk	G	A	G	274	83	88	259	539	268	440	276	5.29[3.96-7.07]	1.12[0.79-1.58]	6.81[5.11-9.09]	Negative	-0.3[-0.5946--0.0251]	0.0329359	1	20	8678446	rs2295179	NARAC	non-risk	G	A	G	357	9	15	291	437	265	337	273	42.3[21.0-85.5]	2.27[0.95-5.40]	56.8[28.2-114.]	Negative	-0.3[-0.7239--0.0178]	0.0394596	1
4	39616548	rs12512211	EIRA	risk	G	A	G	183	56	115	350	313	204	666	340	6.52[4.69-9.07]	1.08[0.74-1.56]	5.13[3.62-7.28]	Positive	0.20[0.01620-0.38535]	0.0329985	1	4	39616548	rs12512211	NARAC	non-risk	G	A	G	238	8	16	410	269	205	505	333	37.4[17.8-78.6]	1.09[0.45-2.66]	28.9[13.6-61.3]	Positive	0.22[0.01813-0.43217]	0.0330312	1
20	8672107	rs6077408	EIRA	non-risk	G	A	G	273	80	88	256	530	264	431	269	5.50[4.10-7.37]	1.17[0.82-1.66]	7.04[5.25-9.43]	Negative	-0.3[-0.5984--0.0248]	0.0331835	1	20	8672107	rs6077408	NARAC	non-risk	G	A	G	355	9	15	293	433	264	341	274	42.6[21.1-85.9]	2.27[0.95-5.39]	56.6[28.1-114.]	Negative	-0.3[-0.7102--0.0099]	0.0438536	1
9	109803058	rs7357755	EIRA	non-risk	T	C	T	292	94	74	221	525	259	415	269	4.86[3.67-6.43]	1.03[0.72-1.46]	6.38[4.83-8.42]	Negative	-0.3[-0.6127--0.0253]	0.0332286	1	9	109803058	rs7357755	NARAC	non-risk	T	C	T	321	8	16	327	413	253	361	285	40.7[19.4-85.3]	1.94[0.80-4.72]	55.0[26.2-115.]	Negative	-0.3[-0.7276--0.0184]	0.0392211	1
12	126644686	rs11058559	EIRA	non-risk	C	G	G	34	8	163	499	34	29	943	513	7.70[3.53-16.7]	1.34[0.60-2.96]	4.62[1.83-11.6]	Positive	0.35[0.02813-0.68360]	0.0333131	1	12	126644686	rs11058559	NARAC	non-risk	C	G	C	425	14	10	223	493	368	281	170	41.2[22.8-74.5]	1.18[0.50-2.77]	31.1[17.6-55.0]	Positive	0.24[0.03040-0.45017]	0.0248396	1
1	218122560	rs10495088	EIRA	non-risk	T	C	C	506	155	16	27	926	498	53	46	3.67[2.37-5.68]	1.88[0.98-3.61]	6.17[4.99-7.63]	Negative	-0.9[-1.7681--0.0727]	0.0333209	1	1	218122560	rs10495088	NARAC	non-risk	T	C	T	281	10	14	367	356	193	418	345	28.4[14.5-55.5]	1.07[0.45-2.51]	42.0[21.3-82.9]	Negative	-0.4[-0.8713--0.0858]	0.0169273	1
2	33841916	rs7604454	EIRA	non-risk	C	T	C	237	67	100	287	481	238	481	301	5.79[4.25-7.89]	1.25[0.87-1.79]	7.32[5.34-10.0]	Negative	-0.3[-0.5909--0.0241]	0.0334177	1	2	33841916	rs7604454	NARAC	non-risk	C	T	C	326	7	17	322	362	228	412	310	49.3[22.4-108.]	2.52[1.00-6.32]	67.0[30.3-148.]	Negative	-0.3[-0.7541--0.0261]	0.0356512	1
1	50564416	rs12743369	EIRA	non-risk	A	G	G	414	127	38	82	759	396	175	121	4.81[3.53-6.54]	1.50[0.97-2.32]	6.34[5.01-8.02]	Negative	-0.4[-0.8168--0.0333]	0.0334377	1	1	50564416	rs12743369	NARAC	non-risk	A	G	A	435	11	13	213	529	349	245	189	38.4[20.0-73.6]	2.40[1.03-5.61]	51.9[27.5-97.8]	Negative	-0.3[-0.7657--0.0113]	0.0435025	1
1	186698784	rs11580799	EIRA	non-risk	A	G	A	416	133	37	112	734	433	238	108	6.97[5.15-9.42]	1.01[0.66-1.55]	5.37[4.27-6.76]	Positive	0.22[0.01769-0.43563]	0.0335021	1	1	186698784	rs11580799	NARAC	non-risk	A	G	A	473	18	6	175	565	410	209	128	40.4[23.3-70.0]	1.06[0.40-2.80]	30.2[18.2-50.3]	Positive	0.24[0.02480-0.47345]	0.0294975	1
18	43248509	rs10451385	EIRA	risk	T	C	T	395	124	47	138	686	409	292	135	7.02[5.26-9.37]	1.08[0.73-1.60]	5.42[4.28-6.88]	Positive	0.21[0.01674-0.41209]	0.0335047	1	18	43248509	rs10451385	NARAC	risk	T	C	T	452	14	10	196	526	396	248	142	48.3[26.6-87.7]	1.79[0.75-4.22]	36.1[20.4-63.6]	Positive	0.23[0.01863-0.45468]	0.0333749	1
18	43248578	rs9304319	EIRA	risk	C	A	C	395	124	47	138	686	409	292	135	7.02[5.26-9.37]	1.08[0.73-1.60]	5.42[4.28-6.88]	Positive	0.21[0.01674-0.41209]	0.0335047	1	18	43248578	rs9304319	NARAC	risk	C	A	C	452	14	10	196	526	396	248	142	48.3[26.6-87.7]	1.79[0.75-4.22]	36.1[20.4-63.6]	Positive	0.23[0.01863-0.45468]	0.0333749	1
7	40877716	rs12019351	EIRA	risk	C	A	C	309	93	74	205	548	340	403	194	7.08[5.29-9.46]	1.21[0.85-1.73]	5.46[4.16-7.15]	Positive	0.19[0.01546-0.38083]	0.0335078	1	7	40877716	rs12019351	NARAC	non-risk	C	A	C	378	14	10	270	435	334	339	204	41.9[23.2-75.5]	1.12[0.48-2.63]	28.9[16.2-51.5]	Positive	0.30[0.12252-0.49025]	0.00109005	1
2	196054559	rs1511263	EIRA	non-risk	T	C	T	332	99	58	174	592	364	339	163	7.09[5.28-9.51]	1.12[0.77-1.62]	5.50[4.23-7.15]	Positive	0.20[0.01612-0.39713]	0.0335153	1	2	196054559	rs1511263	NARAC	non-risk	T	C	T	415	13	11	233	503	373	271	165	48.3[26.1-89.3]	1.49[0.64-3.47]	33.7[18.7-60.8]	Positive	0.29[0.09472-0.48864]	0.00370081	1
2	129184166	rs2124432	EIRA	non-risk	A	G	A	261	79	92	272	430	269	549	275	6.80[5.07-9.12]	1.13[0.79-1.60]	5.36[3.98-7.21]	Positive	0.19[0.01491-0.36989]	0.0336077	1	2	129184166	rs2124432	NARAC	non-risk	A	G	A	319	11	13	329	365	266	409	272	43.0[22.6-82.0]	1.36[0.58-3.16]	32.5[17.0-61.8]	Positive	0.23[0.03825-0.43495]	0.019386	1
1	218131059	rs12407472	EIRA	non-risk	C	A	A	504	155	16	27	923	497	53	46	3.66[2.36-5.66]	1.87[0.97-3.60]	6.14[4.97-7.60]	Negative	-0.9[-1.7655--0.0711]	0.0336107	1	1	218131059	rs12407472	NARAC	risk	C	A	C	279	10	14	369	356	191	418	347	27.9[14.3-54.6]	1.06[0.45-2.48]	42.6[21.6-84.1]	Negative	-0.5[-0.9320--0.1193]	0.0112263	1
2	34216803	rs11124354	EIRA	non-risk	C	G	C	294	93	78	238	481	296	493	243	6.49[4.89-8.60]	1.02[0.72-1.45]	5.20[3.94-6.86]	Positive	0.19[0.01501-0.37342]	0.0336561	1	2	34216803	rs11124354	NARAC	risk	C	G	C	372	10	14	276	393	304	381	234	47.4[24.2-92.7]	1.63[0.69-3.83]	36.7[18.9-71.5]	Positive	0.21[0.00703-0.41579]	0.0426132	1
1	218143041	rs11577733	EIRA	non-risk	T	C	C	407	122	45	112	757	394	205	140	4.96[3.68-6.67]	1.34[0.89-2.00]	6.53[5.15-8.29]	Negative	-0.3[-0.7414--0.0296]	0.0337418	1	1	218143041	rs11577733	NARAC	risk	T	C	T	472	17	7	176	583	364	191	174	25.0[14.4-43.4]	1.16[0.45-2.93]	37.5[22.2-63.3]	Negative	-0.5[-0.9349--0.0786]	0.0203507	1
10	30624741	rs2246584	EIRA	risk	T	C	T	253	66	101	270	435	279	529	257	7.98[5.84-10.8]	1.42[0.99-2.03]	6.04[4.42-8.25]	Positive	0.19[0.01459-0.36550]	0.0337492	1	10	30624741	rs2246584	NARAC	non-risk	T	C	T	285	10	14	363	320	259	454	279	40.3[20.6-79.1]	1.19[0.51-2.80]	30.1[15.2-59.3]	Positive	0.24[0.05404-0.44455]	0.0123322	1
10	30637995	rs10826783	EIRA	non-risk	C	G	C	150	40	127	365	240	162	719	366	7.42[5.10-10.7]	1.28[0.85-1.92]	5.60[3.73-8.39]	Positive	0.20[0.01584-0.39843]	0.0338057	1	10	30637995	rs10826783	NARAC	non-risk	C	G	C	195	6	18	453	213	175	561	363	43.2[18.4-101.]	1.33[0.50-3.51]	32.1[13.5-76.5]	Positive	0.24[0.03884-0.45994]	0.0202518	1
1	218129460	rs6660671	EIRA	non-risk	A	G	G	504	155	16	27	922	497	53	46	3.66[2.36-5.66]	1.87[0.97-3.60]	6.14[4.96-7.59]	Negative	-0.9[-1.7630--0.0700]	0.0338228	1	1	218129460	rs6660671	NARAC	non-risk	A	G	A	279	10	14	369	356	194	418	344	28.3[14.5-55.3]	1.06[0.45-2.48]	41.7[21.1-82.3]	Negative	-0.4[-0.8655--0.0823]	0.0176935	1
1	218130313	rs12045840	EIRA	non-risk	T	C	C	504	155	16	27	922	497	53	46	3.66[2.36-5.66]	1.87[0.97-3.60]	6.14[4.96-7.59]	Negative	-0.9[-1.7630--0.0700]	0.0338231	1	1	218130313	rs12045840	NARAC	non-risk	T	C	T	277	10	14	371	355	193	419	345	28.1[14.4-54.9]	1.05[0.45-2.46]	41.7[21.1-82.4]	Negative	-0.4[-0.8800--0.0900]	0.0160898	1
19	19449603	rs2074089	EIRA	risk	G	A	G	217	68	100	289	349	221	589	296	6.44[4.73-8.76]	1.08[0.76-1.55]	5.07[3.67-6.99]	Positive	0.19[0.01517-0.38376]	0.03389	1	19	19449603	rs2074089	NARAC	risk	G	A	G	290	11	13	358	321	247	453	291	38.5[20.2-73.3]	1.12[0.48-2.61]	29.2[15.3-55.9]	Positive	0.23[0.03782-0.43645]	0.0197031	1
1	218125274	rs10863360	EIRA	non-risk	C	A	A	504	154	16	27	920	497	53	46	3.68[2.38-5.70]	1.89[0.98-3.63]	6.17[4.98-7.63]	Negative	-0.9[-1.7618--0.0693]	0.0339509	1	1	218125274	rs10863360	NARAC	non-risk	C	A	C	280	10	14	368	356	194	418	344	28.4[14.5-55.5]	1.06[0.45-2.50]	41.8[21.2-82.5]	Negative	-0.4[-0.8657--0.0825]	0.0176298	1
1	218124557	rs1890607	EIRA	non-risk	A	C	C	504	154	16	27	920	497	53	46	3.68[2.38-5.70]	1.89[0.98-3.63]	6.17[4.98-7.63]	Negative	-0.9[-1.7618--0.0693]	0.0339509	1	1	218124557	rs1890607	NARAC	non-risk	A	C	A	280	10	14	368	356	194	418	344	28.4[14.5-55.5]	1.06[0.45-2.50]	41.8[21.2-82.5]	Negative	-0.4[-0.8657--0.0825]	0.0176298	1
1	218123345	rs6677565	EIRA	non-risk	T	A	A	504	154	16	27	920	497	53	46	3.68[2.38-5.70]	1.89[0.98-3.63]	6.17[4.98-7.63]	Negative	-0.9[-1.7618--0.0693]	0.0339509	1	1	218123345	rs6677565	NARAC	non-risk	T	A	T	280	10	14	368	356	194	418	344	28.4[14.5-55.5]	1.06[0.45-2.50]	41.8[21.2-82.5]	Negative	-0.4[-0.8657--0.0825]	0.0176298	1
10	30640315	rs10826785	EIRA	non-risk	A	C	A	147	40	127	369	239	162	721	370	7.21[4.96-10.4]	1.24[0.82-1.86]	5.47[3.64-8.20]	Positive	0.20[0.01572-0.39976]	0.0339587	1	10	30640315	rs10826785	NARAC	non-risk	A	C	A	195	6	18	453	214	175	560	363	43.0[18.3-100.]	1.33[0.50-3.51]	32.5[13.6-77.5]	Positive	0.23[0.02043-0.44959]	0.0318173	1
12	126643040	rs10847098	EIRA	non-risk	A	T	T	34	8	163	499	34	29	943	514	7.68[3.52-16.7]	1.34[0.60-2.96]	4.61[1.83-11.6]	Positive	0.35[0.02650-0.68303]	0.0341543	1	12	126643040	rs10847098	NARAC	non-risk	A	T	A	425	14	10	223	493	368	281	170	41.2[22.8-74.5]	1.18[0.50-2.77]	31.1[17.6-55.0]	Positive	0.24[0.03040-0.45017]	0.0248396	1
12	126640544	rs11058556	EIRA	non-risk	C	T	T	34	8	163	499	34	29	943	514	7.68[3.52-16.7]	1.34[0.60-2.96]	4.61[1.83-11.6]	Positive	0.35[0.02650-0.68303]	0.0341543	1	12	126640544	rs11058556	NARAC	non-risk	C	T	C	425	14	10	223	493	368	281	170	41.2[22.8-74.5]	1.18[0.50-2.77]	31.1[17.6-55.0]	Positive	0.24[0.03040-0.45017]	0.0248396	1
20	8670104	rs6056016	EIRA	non-risk	T	C	T	273	81	87	251	533	267	430	270	5.40[4.03-7.24]	1.16[0.82-1.65]	6.91[5.16-9.24]	Negative	-0.3[-0.5950--0.0230]	0.0342043	1	20	8670104	rs6056016	NARAC	non-risk	T	C	T	355	9	15	293	433	264	341	274	42.6[21.1-85.9]	2.27[0.95-5.39]	56.6[28.1-114.]	Negative	-0.3[-0.7102--0.0099]	0.0438536	1
15	94499930	rs56296708	EIRA	non-risk	G	A	G	206	62	106	320	343	221	617	313	6.59[4.80-9.05]	1.08[0.75-1.55]	5.20[3.73-7.25]	Positive	0.19[0.01470-0.38040]	0.0342096	1	15	94499930	rs56296708	NARAC	risk	G	A	G	279	9	15	369	311	243	463	295	39.2[19.4-79.1]	1.16[0.49-2.77]	30.4[15.0-61.7]	Positive	0.21[0.01572-0.42360]	0.0347618	1
1	6147341	rs11584419	EIRA	risk	C	A	C	424	130	36	100	749	447	208	92	7.44[5.42-10.2]	1.14[0.74-1.75]	5.54[4.40-6.98]	Positive	0.23[0.01751-0.45472]	0.0342535	1	1	6147341	rs11584419	NARAC	non-risk	C	A	C	495	18	6	153	580	423	194	115	41.0[23.5-71.3]	1.09[0.41-2.88]	30.5[18.4-50.7]	Positive	0.25[0.02235-0.48218]	0.0315076	1
2	3285823	rs879470	EIRA	risk	G	A	G	319	102	66	190	515	316	426	205	6.61[4.99-8.75]	1.09[0.76-1.56]	5.20[3.99-6.78]	Positive	0.19[0.01469-0.38286]	0.0343076	1	2	3285823	rs879470	NARAC	non-risk	G	A	G	350	12	12	298	396	302	378	236	39.3[21.0-73.3]	1.12[0.48-2.61]	30.0[16.2-55.7]	Positive	0.23[0.03100-0.43346]	0.0236983	1
1	111228243	rs35463305	EIRA	non-risk	T	C	C	504	160	7	22	934	523	40	13	9.88[5.13-19.0]	1.04[0.43-2.50]	5.73[4.65-7.06]	Positive	0.41[0.03065-0.80011]	0.0343297	1	1	111228243	rs35463305	NARAC	non-risk	T	C	T	432	16	8	216	507	380	267	158	39.8[22.6-70.0]	1.11[0.46-2.72]	30.5[17.8-52.4]	Positive	0.22[0.01417-0.44317]	0.0366599	1
1	111228193	rs35686630	EIRA	non-risk	T	C	C	504	160	7	22	934	523	40	13	9.88[5.13-19.0]	1.04[0.43-2.50]	5.73[4.65-7.06]	Positive	0.41[0.03065-0.80011]	0.0343297	1	1	111228193	rs35686630	NARAC	non-risk	T	C	T	432	16	8	216	507	380	267	158	39.8[22.6-70.0]	1.11[0.46-2.72]	30.5[17.8-52.4]	Positive	0.22[0.01417-0.44317]	0.0366599	1
18	49222701	rs1618025	EIRA	non-risk	G	T	T	110	35	136	419	192	131	780	412	6.01[4.03-8.97]	1.01[0.66-1.55]	4.64[2.98-7.22]	Positive	0.22[0.01666-0.43518]	0.0343389	1	18	49222701	rs1618025	NARAC	non-risk	G	T	G	175	6	18	473	226	174	548	364	42.8[18.2-100.]	1.30[0.49-3.42]	31.5[13.2-75.0]	Positive	0.25[0.04896-0.46280]	0.0153591	1
19	19440864	rs67720221	EIRA	risk	C	T	C	218	68	100	289	349	221	589	296	6.47[4.75-8.80]	1.09[0.76-1.55]	5.09[3.69-7.02]	Positive	0.19[0.01458-0.38315]	0.0344166	1	19	19440864	rs67720221	NARAC	risk	C	T	C	291	11	13	357	320	248	454	290	38.7[20.3-73.6]	1.12[0.48-2.62]	29.1[15.2-55.7]	Positive	0.24[0.04598-0.44137]	0.0156967	1
3	68621280	rs9864780	EIRA	risk	T	C	C	53	15	152	473	81	61	882	471	6.63[3.68-11.9]	1.11[0.60-2.04]	4.63[2.38-9.01]	Positive	0.28[0.02070-0.54801]	0.0345224	1	3	68621280	rs9864780	NARAC	risk	T	C	T	329	8	16	319	343	255	431	283	54.3[25.9-113.]	2.00[0.82-4.85]	41.9[20.0-87.9]	Positive	0.21[0.00675-0.41327]	0.0428549	1
9	123483621	rs4837793	EIRA	risk	G	A	G	257	83	84	254	435	267	519	259	6.29[4.70-8.42]	1.01[0.71-1.43]	5.05[3.76-6.76]	Positive	0.19[0.01425-0.37764]	0.034534	1	9	123483621	rs4837793	NARAC	non-risk	G	A	G	319	9	15	329	357	277	417	261	54.0[26.6-109.]	1.96[0.82-4.67]	39.7[19.6-80.3]	Positive	0.24[0.05317-0.43946]	0.0124332	1
18	75363151	rs11661736	EIRA	risk	A	C	C	65	13	147	435	84	67	850	454	9.38[5.10-17.2]	1.65[0.88-3.10]	6.26[3.17-12.3]	Positive	0.26[0.01903-0.50449]	0.0345369	1	18	75363151	rs11661736	NARAC	risk	A	C	A	280	9	15	368	316	255	458	283	44.0[21.6-89.4]	1.33[0.56-3.17]	32.0[15.7-65.2]	Positive	0.26[0.07350-0.45547]	0.0066407	1
13	83262375	rs1333572	EIRA	non-risk	C	G	G	416	127	42	105	794	415	165	118	4.66[3.41-6.36]	1.29[0.85-1.95]	6.34[5.02-8.00]	Negative	-0.4[-0.8150--0.0307]	0.03455	1	13	83262375	rs1333572	NARAC	non-risk	G	C	C	500	18	6	148	611	403	163	135	24.2[14.0-42.0]	1.02[0.38-2.72]	35.2[21.2-58.6]	Negative	-0.4[-0.8949--0.0127]	0.0437402	1
5	142718290	rs2398631	EIRA	non-risk	C	G	G	500	155	12	27	908	522	53	18	9.85[5.59-17.3]	1.41[0.69-2.86]	5.69[4.60-7.03]	Positive	0.37[0.02750-0.73226]	0.034603	1	5	142718290	rs2398631	NARAC	non-risk	C	G	C	409	15	9	239	470	359	304	179	37.5[21.1-66.6]	1.01[0.42-2.40]	29.4[16.8-51.4]	Positive	0.21[0.00128-0.42734]	0.0486344	1
1	218134880	rs11117988	EIRA	non-risk	A	C	C	504	155	16	28	923	497	53	46	3.66[2.36-5.66]	1.81[0.94-3.47]	6.14[4.97-7.60]	Negative	-0.9[-1.7388--0.0653]	0.0346043	1	1	218134880	rs11117988	NARAC	risk	A	C	A	279	10	14	369	356	191	418	347	27.9[14.3-54.6]	1.06[0.45-2.48]	42.6[21.6-84.1]	Negative	-0.5[-0.9320--0.1193]	0.0112263	1
1	218135105	rs11117989	EIRA	non-risk	C	T	T	504	155	16	28	923	497	53	46	3.66[2.36-5.66]	1.81[0.94-3.47]	6.14[4.97-7.60]	Negative	-0.9[-1.7388--0.0653]	0.0346043	1	1	218135105	rs11117989	NARAC	risk	C	T	C	279	10	14	369	356	191	418	347	27.9[14.3-54.6]	1.06[0.45-2.48]	42.6[21.6-84.1]	Negative	-0.5[-0.9320--0.1193]	0.0112263	1
1	218132810	rs11804970	EIRA	non-risk	A	G	G	504	155	16	28	923	497	53	46	3.66[2.36-5.66]	1.81[0.94-3.47]	6.14[4.97-7.60]	Negative	-0.9[-1.7388--0.0653]	0.0346043	1	1	218132810	rs11804970	NARAC	risk	A	G	A	279	10	14	369	356	191	418	347	27.9[14.3-54.6]	1.06[0.45-2.48]	42.6[21.6-84.1]	Negative	-0.5[-0.9320--0.1193]	0.0112263	1
1	218132837	rs11804972	EIRA	non-risk	A	G	G	504	155	16	28	923	497	53	46	3.66[2.36-5.66]	1.81[0.94-3.47]	6.14[4.97-7.60]	Negative	-0.9[-1.7388--0.0653]	0.0346043	1	1	218132837	rs11804972	NARAC	risk	A	G	A	279	10	14	369	356	191	418	347	27.9[14.3-54.6]	1.06[0.45-2.48]	42.6[21.6-84.1]	Negative	-0.5[-0.9320--0.1193]	0.0112263	1
1	218136146	rs12036258	EIRA	non-risk	C	T	T	504	155	16	28	923	497	53	46	3.66[2.36-5.66]	1.81[0.94-3.47]	6.14[4.97-7.60]	Negative	-0.9[-1.7388--0.0653]	0.0346043	1	1	218136146	rs12036258	NARAC	risk	C	T	C	279	10	14	369	356	191	418	347	27.9[14.3-54.6]	1.06[0.45-2.48]	42.6[21.6-84.1]	Negative	-0.5[-0.9320--0.1193]	0.0112263	1
1	218136946	rs17742222	EIRA	non-risk	A	T	T	504	155	16	28	923	497	53	46	3.66[2.36-5.66]	1.81[0.94-3.47]	6.14[4.97-7.60]	Negative	-0.9[-1.7388--0.0653]	0.0346043	1	1	218136946	rs17742222	NARAC	risk	A	T	A	279	10	14	369	356	191	418	347	27.9[14.3-54.6]	1.06[0.45-2.48]	42.6[21.6-84.1]	Negative	-0.5[-0.9320--0.1193]	0.0112263	1
18	49219883	rs1676130	EIRA	non-risk	T	C	C	110	35	136	421	193	131	783	412	6.03[4.04-9.00]	1.00[0.65-1.54]	4.66[2.99-7.26]	Positive	0.22[0.01632-0.43477]	0.0346092	1	18	49219883	rs1676130	NARAC	non-risk	T	C	T	175	6	18	473	226	174	548	364	42.8[18.2-100.]	1.30[0.49-3.42]	31.5[13.2-75.0]	Positive	0.25[0.04896-0.46280]	0.0153591	1
18	49220158	rs1699902	EIRA	non-risk	T	A	A	110	35	136	421	193	131	783	412	6.03[4.04-9.00]	1.00[0.65-1.54]	4.66[2.99-7.26]	Positive	0.22[0.01632-0.43477]	0.0346092	1	18	49220158	rs1699902	NARAC	non-risk	T	A	T	175	6	18	473	226	174	548	364	42.8[18.2-100.]	1.30[0.49-3.42]	31.5[13.2-75.0]	Positive	0.25[0.04896-0.46280]	0.0153591	1
18	49221034	rs1699904	EIRA	non-risk	T	C	C	110	35	136	421	193	131	783	412	6.03[4.04-9.00]	1.00[0.65-1.54]	4.66[2.99-7.26]	Positive	0.22[0.01632-0.43477]	0.0346092	1	18	49221034	rs1699904	NARAC	non-risk	T	C	T	175	6	18	473	226	174	548	364	42.8[18.2-100.]	1.30[0.49-3.42]	31.5[13.2-75.0]	Positive	0.25[0.04896-0.46280]	0.0153591	1
18	49221729	rs1699905	EIRA	non-risk	C	T	T	110	35	136	421	193	131	783	412	6.03[4.04-9.00]	1.00[0.65-1.54]	4.66[2.99-7.26]	Positive	0.22[0.01632-0.43477]	0.0346092	1	18	49221729	rs1699905	NARAC	non-risk	C	T	C	175	6	18	473	226	174	548	364	42.8[18.2-100.]	1.30[0.49-3.42]	31.5[13.2-75.0]	Positive	0.25[0.04896-0.46280]	0.0153591	1
3	851289	rs4686166	EIRA	non-risk	T	C	C	57	17	146	451	78	58	859	456	6.41[3.67-11.1]	1.07[0.60-1.91]	4.48[2.35-8.52]	Positive	0.28[0.02091-0.55780]	0.0346233	1	3	851289	rs4686166	NARAC	risk	T	C	T	344	10	14	304	354	274	420	264	48.2[24.7-94.2]	1.73[0.74-4.06]	37.3[19.1-72.9]	Positive	0.21[0.00670-0.41532]	0.0429418	1
9	123460769	rs7849566	EIRA	risk	A	C	A	263	83	87	266	445	276	531	268	6.39[4.78-8.54]	1.02[0.72-1.45]	5.13[3.83-6.86]	Positive	0.19[0.01393-0.37251]	0.0346586	1	9	123460769	rs7849566	NARAC	non-risk	A	C	A	317	8	16	331	358	278	416	260	59.7[28.4-125.]	2.30[0.95-5.60]	44.5[21.2-93.4]	Positive	0.23[0.03661-0.42965]	0.0200622	1
10	30616874	rs959629	EIRA	non-risk	T	C	T	151	40	125	362	235	159	717	365	7.48[5.15-10.8]	1.28[0.85-1.92]	5.64[3.76-8.46]	Positive	0.20[0.01489-0.39969]	0.0347079	1	10	30616874	rs959629	NARAC	non-risk	T	C	T	196	6	18	452	214	175	560	363	43.3[18.5-101.]	1.34[0.51-3.53]	32.3[13.5-77.0]	Positive	0.24[0.03446-0.45727]	0.0226329	1
14	38155167	rs12433850	EIRA	risk	G	A	A	97	29	141	431	157	111	819	429	6.48[4.20-10.0]	1.09[0.69-1.73]	4.87[3.00-7.90]	Positive	0.23[0.01678-0.45069]	0.0347199	1	14	38155167	rs12433850	NARAC	risk	G	A	G	218	6	18	430	221	195	553	343	52.9[22.5-124.]	1.78[0.67-4.68]	39.2[16.4-93.2]	Positive	0.24[0.03665-0.45126]	0.021081	1
4	14267184	rs7684710	EIRA	non-risk	G	A	A	29	6	164	502	33	29	943	510	8.92[3.67-21.6]	1.54[0.62-3.79]	5.27[1.91-14.5]	Positive	0.34[0.02493-0.67010]	0.0347289	1	4	14267184	rs7684710	NARAC	non-risk	G	A	G	228	8	16	420	294	227	480	311	41.9[19.8-88.4]	1.29[0.53-3.14]	32.4[15.3-68.9]	Positive	0.21[0.01198-0.42355]	0.0380693	1
9	123482747	rs4836829	EIRA	risk	C	T	C	257	83	85	254	436	267	521	259	6.32[4.72-8.46]	1.02[0.72-1.45]	5.06[3.77-6.78]	Positive	0.19[0.01399-0.37701]	0.0347619	1	9	123482747	rs4836829	NARAC	non-risk	C	T	C	319	9	15	329	357	277	417	261	54.0[26.6-109.]	1.96[0.82-4.67]	39.7[19.6-80.3]	Positive	0.24[0.05317-0.43946]	0.0124332	1
1	218138910	rs4447048	EIRA	non-risk	A	C	C	504	155	16	28	920	496	53	46	3.66[2.36-5.65]	1.81[0.94-3.46]	6.14[4.96-7.59]	Negative	-0.9[-1.7368--0.0643]	0.0347836	1	1	218138910	rs4447048	NARAC	risk	A	C	A	279	10	14	369	356	191	418	347	27.9[14.3-54.6]	1.06[0.45-2.48]	42.6[21.6-84.1]	Negative	-0.5[-0.9320--0.1193]	0.0112263	1
1	218129197	rs6700531	EIRA	non-risk	C	T	T	501	154	16	27	918	497	53	46	3.66[2.36-5.66]	1.88[0.97-3.61]	6.10[4.93-7.55]	Negative	-0.9[-1.7518--0.0647]	0.0348176	1	1	218129197	rs6700531	NARAC	non-risk	C	T	C	281	10	14	367	359	195	415	343	28.5[14.6-55.6]	1.07[0.46-2.52]	42.0[21.3-82.9]	Negative	-0.4[-0.8698--0.0853]	0.0169975	1
1	218138393	rs4411187	EIRA	non-risk	A	C	C	504	155	16	28	922	497	53	46	3.66[2.36-5.66]	1.81[0.94-3.47]	6.14[4.96-7.59]	Negative	-0.9[-1.7362--0.0641]	0.0348286	1	1	218138393	rs4411187	NARAC	risk	A	C	A	279	10	14	369	356	191	418	347	27.9[14.3-54.6]	1.06[0.45-2.48]	42.6[21.6-84.1]	Negative	-0.5[-0.9320--0.1193]	0.0112263	1
4	37710190	rs13111859	EIRA	non-risk	C	T	C	153	43	126	371	264	120	701	417	6.14[4.27-8.83]	1.23[0.82-1.83]	8.18[5.45-12.2]	Negative	-0.3[-0.7120--0.0262]	0.0348722	1	4	37710190	rs13111859	NARAC	non-risk	C	T	C	206	6	18	442	263	145	511	393	33.2[14.2-77.2]	1.21[0.46-3.17]	47.1[19.8-111.]	Negative	-0.4[-0.8299--0.0217]	0.0388564	1
1	218151671	rs56250003	EIRA	non-risk	C	T	T	504	155	16	28	921	497	53	46	3.66[2.36-5.66]	1.81[0.95-3.47]	6.13[4.96-7.58]	Negative	-0.8[-1.7341--0.0631]	0.0350134	1	1	218151671	rs56250003	NARAC	risk	C	T	C	281	10	14	367	356	192	418	346	28.1[14.4-54.8]	1.06[0.45-2.49]	42.4[21.5-83.8]	Negative	-0.5[-0.9147--0.1097]	0.0126192	1
1	218150904	rs73109668	EIRA	non-risk	A	C	C	504	155	16	28	921	497	53	46	3.66[2.36-5.66]	1.81[0.95-3.47]	6.13[4.96-7.58]	Negative	-0.8[-1.7341--0.0631]	0.0350134	1	1	218150904	rs73109668	NARAC	risk	A	C	A	281	10	14	367	356	192	418	346	28.1[14.4-54.8]	1.06[0.45-2.49]	42.4[21.5-83.8]	Negative	-0.5[-0.9147--0.1097]	0.0126192	1
9	123450155	rs10491783	EIRA	risk	C	G	C	264	84	87	268	447	276	532	268	6.34[4.75-8.46]	1.00[0.71-1.42]	5.11[3.82-6.83]	Positive	0.19[0.01356-0.37244]	0.0350179	1	9	123450155	rs10491783	NARAC	non-risk	C	G	C	322	9	15	326	364	281	410	257	53.3[26.3-107.]	1.95[0.82-4.64]	40.0[19.8-80.9]	Positive	0.23[0.03312-0.42805]	0.0220946	1
9	123443776	rs1886337	EIRA	risk	G	C	G	264	84	87	268	447	276	532	268	6.34[4.75-8.46]	1.00[0.71-1.42]	5.11[3.82-6.83]	Positive	0.19[0.01356-0.37244]	0.0350179	1	9	123443776	rs1886337	NARAC	non-risk	G	C	G	322	9	15	326	364	281	410	257	53.3[26.3-107.]	1.95[0.82-4.64]	40.0[19.8-80.9]	Positive	0.23[0.03312-0.42805]	0.0220946	1
9	123446325	rs4837790	EIRA	risk	C	T	C	264	84	87	268	447	276	532	268	6.34[4.75-8.46]	1.00[0.71-1.42]	5.11[3.82-6.83]	Positive	0.19[0.01356-0.37244]	0.0350179	1	9	123446325	rs4837790	NARAC	non-risk	C	T	C	322	9	15	326	364	281	410	257	53.3[26.3-107.]	1.95[0.82-4.64]	40.0[19.8-80.9]	Positive	0.23[0.03312-0.42805]	0.0220946	1
9	123453312	rs966397	EIRA	risk	G	A	G	264	84	87	268	447	276	532	268	6.34[4.75-8.46]	1.00[0.71-1.42]	5.11[3.82-6.83]	Positive	0.19[0.01356-0.37244]	0.0350179	1	9	123453312	rs966397	NARAC	non-risk	G	A	G	322	9	15	326	364	281	410	257	53.3[26.3-107.]	1.95[0.82-4.64]	40.0[19.8-80.9]	Positive	0.23[0.03312-0.42805]	0.0220946	1
1	175193108	rs2861165	EIRA	non-risk	A	G	G	447	137	29	64	827	436	122	91	4.54[3.25-6.35]	1.49[0.92-2.42]	6.32[5.04-7.93]	Negative	-0.5[-0.9688--0.0352]	0.0350467	1	1	175193108	rs2861165	NARAC	non-risk	A	G	A	395	11	13	253	486	313	288	225	31.8[16.6-60.8]	1.51[0.64-3.51]	45.0[23.8-85.2]	Negative	-0.4[-0.8031--0.0554]	0.0243924	1
3	68621118	rs9860873	EIRA	non-risk	A	C	C	53	15	152	471	81	61	882	471	6.63[3.68-11.9]	1.12[0.61-2.05]	4.63[2.38-9.01]	Positive	0.28[0.01986-0.54728]	0.0350608	1	3	68621118	rs9860873	NARAC	risk	A	C	A	328	8	16	320	343	255	431	283	54.2[25.9-113.]	1.99[0.82-4.83]	41.8[19.9-87.8]	Positive	0.21[0.00686-0.41334]	0.0427402	1
18	44736336	rs2635047	EIRA	non-risk	T	C	T	156	50	118	367	268	175	696	361	6.16[4.36-8.70]	1.01[0.69-1.48]	4.87[3.34-7.08]	Positive	0.20[0.01456-0.40161]	0.035075	1	18	44736336	rs2635047	NARAC	non-risk	T	C	T	164	6	18	484	209	171	565	367	42.3[17.9-99.8]	1.29[0.49-3.43]	31.6[13.1-75.8]	Positive	0.24[0.03359-0.45853]	0.0232156	1
13	83285405	rs9546224	EIRA	non-risk	T	A	A	425	129	40	107	798	417	170	122	4.66[3.43-6.33]	1.20[0.79-1.82]	6.38[5.06-8.04]	Negative	-0.4[-0.7990--0.0288]	0.0351462	1	13	83285405	rs9546224	NARAC	non-risk	A	T	T	500	18	6	148	609	398	165	140	23.8[13.7-41.1]	1.02[0.38-2.72]	35.6[21.4-59.2]	Negative	-0.4[-0.9491--0.0478]	0.0301399	1
22	30352032	rs5763638	EIRA	non-risk	T	C	T	192	56	112	326	340	216	618	311	6.88[4.95-9.56]	1.15[0.80-1.67]	5.37[3.80-7.57]	Positive	0.19[0.01365-0.37938]	0.0351763	1	22	30352032	rs5763638	NARAC	non-risk	T	C	T	225	6	18	423	251	198	523	340	48.5[20.7-113.]	1.56[0.59-4.10]	36.8[15.5-87.1]	Positive	0.22[0.02196-0.43742]	0.0302128	1
1	218119536	rs2001585	EIRA	non-risk	A	G	G	504	154	16	28	919	497	53	46	3.68[2.38-5.70]	1.82[0.95-3.49]	6.16[4.98-7.62]	Negative	-0.8[-1.7323--0.0623]	0.0351816	1	1	218119536	rs2001585	NARAC	non-risk	A	G	A	281	10	14	367	356	193	418	345	28.4[14.5-55.5]	1.07[0.45-2.51]	42.0[21.3-82.9]	Negative	-0.4[-0.8713--0.0858]	0.0169273	1
13	83288779	rs4885837	EIRA	non-risk	G	C	C	425	128	40	107	799	418	170	122	4.70[3.45-6.39]	1.21[0.80-1.84]	6.42[5.09-8.10]	Negative	-0.4[-0.7981--0.0285]	0.0352353	1	13	83288779	rs4885837	NARAC	non-risk	C	G	G	500	18	6	148	609	398	165	140	23.8[13.7-41.1]	1.02[0.38-2.72]	35.6[21.4-59.2]	Negative	-0.4[-0.9491--0.0478]	0.0301399	1
5	142707734	rs62375502	EIRA	non-risk	T	C	C	504	156	12	27	909	522	53	18	9.84[5.59-17.3]	1.41[0.70-2.87]	5.69[4.61-7.03]	Positive	0.37[0.02616-0.73183]	0.035262	1	5	142707734	rs62375502	NARAC	non-risk	T	C	T	409	15	9	239	470	359	304	179	37.5[21.1-66.6]	1.01[0.42-2.40]	29.4[16.8-51.4]	Positive	0.21[0.00128-0.42734]	0.0486344	1
1	218117996	rs11117985	EIRA	non-risk	T	C	C	484	148	16	27	888	480	48	43	3.59[2.28-5.64]	1.89[0.98-3.64]	6.16[4.95-7.65]	Negative	-0.9[-1.8621--0.0664]	0.0352821	1	1	218117996	rs11117985	NARAC	non-risk	T	C	T	281	10	14	367	356	193	418	345	28.4[14.5-55.5]	1.07[0.45-2.51]	42.0[21.3-82.9]	Negative	-0.4[-0.8713--0.0858]	0.0169273	1
1	218118956	rs907058	EIRA	non-risk	C	T	T	504	154	16	28	918	497	53	46	3.68[2.38-5.70]	1.82[0.95-3.49]	6.15[4.98-7.61]	Negative	-0.8[-1.7297--0.0611]	0.0354095	1	1	218118956	rs907058	NARAC	non-risk	C	T	C	281	10	14	367	356	193	418	345	28.4[14.5-55.5]	1.07[0.45-2.51]	42.0[21.3-82.9]	Negative	-0.4[-0.8713--0.0858]	0.0169273	1
9	123409864	rs10984972	EIRA	risk	T	C	T	265	84	87	268	446	276	531	268	6.35[4.76-8.48]	1.01[0.71-1.43]	5.12[3.83-6.84]	Positive	0.19[0.01300-0.37207]	0.0355536	1	9	123409864	rs10984972	NARAC	non-risk	T	C	T	318	9	15	330	361	278	413	260	53.0[26.2-107.]	1.93[0.81-4.59]	39.8[19.6-80.4]	Positive	0.23[0.03432-0.42880]	0.0213853	1
2	34223732	rs11893699	EIRA	non-risk	A	G	A	294	93	78	238	481	297	492	244	6.45[4.87-8.55]	1.02[0.72-1.45]	5.18[3.93-6.84]	Positive	0.19[0.01296-0.37203]	0.0355903	1	2	34223732	rs11893699	NARAC	risk	A	G	A	372	10	14	276	393	304	381	234	47.4[24.2-92.7]	1.63[0.69-3.83]	36.7[18.9-71.5]	Positive	0.21[0.00703-0.41579]	0.0426132	1
10	30608057	rs639299	EIRA	risk	A	G	A	245	65	97	257	418	272	513	252	7.81[5.70-10.7]	1.42[0.98-2.04]	5.90[4.30-8.09]	Positive	0.19[0.01284-0.36900]	0.0356101	1	10	30608057	rs639299	NARAC	non-risk	A	G	A	285	10	14	363	320	259	454	279	40.3[20.6-79.1]	1.19[0.51-2.80]	30.1[15.2-59.3]	Positive	0.24[0.05404-0.44455]	0.0123322	1
2	5983970	rs73134561	EIRA	non-risk	A	G	G	53	17	151	468	87	65	874	470	5.95[3.40-10.4]	1.01[0.56-1.81]	4.26[2.25-8.04]	Positive	0.28[0.01897-0.54529]	0.0356107	1	2	5983970	rs73134561	NARAC	non-risk	A	G	A	295	8	16	353	339	271	435	267	47.6[22.8-99.4]	1.57[0.64-3.81]	36.6[17.5-76.6]	Positive	0.21[0.01676-0.42031]	0.0337663	1
14	38177019	rs12431417	EIRA	risk	G	A	A	98	29	141	432	157	111	819	429	6.54[4.24-10.0]	1.10[0.69-1.74]	4.92[3.03-7.97]	Positive	0.23[0.01560-0.44919]	0.0356307	1	14	38177019	rs12431417	NARAC	risk	G	A	G	218	6	18	430	222	197	552	341	53.1[22.6-124.]	1.78[0.67-4.68]	38.8[16.3-92.4]	Positive	0.25[0.05009-0.45815]	0.0146388	1
18	49223317	rs1115636	EIRA	non-risk	C	T	T	110	35	136	421	193	131	782	412	6.02[4.03-8.99]	1.00[0.65-1.54]	4.66[2.99-7.26]	Positive	0.22[0.01508-0.43408]	0.0356336	1	18	49223317	rs1115636	NARAC	non-risk	C	T	C	176	6	18	472	226	174	548	364	42.8[18.2-100.]	1.30[0.49-3.42]	31.6[13.2-75.1]	Positive	0.25[0.04891-0.46277]	0.0153786	1
18	49222621	rs1618811	EIRA	non-risk	A	G	G	110	35	136	421	193	131	782	412	6.02[4.03-8.99]	1.00[0.65-1.54]	4.66[2.99-7.26]	Positive	0.22[0.01508-0.43408]	0.0356336	1	18	49222621	rs1618811	NARAC	non-risk	A	G	A	175	6	18	473	226	174	548	364	42.8[18.2-100.]	1.30[0.49-3.42]	31.5[13.2-75.0]	Positive	0.25[0.04896-0.46280]	0.0153591	1
18	49222946	rs1676100	EIRA	non-risk	C	T	T	110	35	136	421	193	131	782	412	6.02[4.03-8.99]	1.00[0.65-1.54]	4.66[2.99-7.26]	Positive	0.22[0.01508-0.43408]	0.0356336	1	18	49222946	rs1676100	NARAC	non-risk	C	T	C	175	6	18	473	226	174	548	364	42.8[18.2-100.]	1.30[0.49-3.42]	31.5[13.2-75.0]	Positive	0.25[0.04896-0.46280]	0.0153591	1
13	83284272	rs1333577	EIRA	non-risk	C	A	A	425	129	40	107	799	418	170	122	4.66[3.43-6.33]	1.20[0.79-1.82]	6.37[5.05-8.03]	Negative	-0.4[-0.7965--0.0274]	0.0357287	1	13	83284272	rs1333577	NARAC	non-risk	A	C	C	500	18	6	148	609	398	165	140	23.8[13.7-41.1]	1.02[0.38-2.72]	35.6[21.4-59.2]	Negative	-0.4[-0.9491--0.0478]	0.0301399	1
6	7027560	rs4612209	EIRA	non-risk	C	T	C	361	111	54	156	665	338	281	186	4.93[3.70-6.55]	1.11[0.76-1.62]	6.48[5.04-8.33]	Negative	-0.3[-0.6505--0.0222]	0.0358385	1	6	7027560	rs4612209	NARAC	non-risk	C	T	T	497	15	9	151	627	404	147	134	30.1[16.6-54.5]	2.33[0.97-5.60]	44.7[25.8-77.5]	Negative	-0.5[-0.9991--0.0580]	0.0276675	1
5	142716357	rs11745958	EIRA	non-risk	T	C	C	504	156	12	27	910	522	53	18	9.84[5.59-17.3]	1.41[0.70-2.87]	5.70[4.62-7.04]	Positive	0.37[0.02496-0.73145]	0.0358582	1	5	142716357	rs11745958	NARAC	non-risk	T	C	T	409	15	9	239	470	359	304	179	37.5[21.1-66.6]	1.01[0.42-2.40]	29.4[16.8-51.4]	Positive	0.21[0.00128-0.42734]	0.0486344	1
5	142722660	rs9324916	EIRA	non-risk	C	G	G	504	156	12	27	910	522	53	18	9.84[5.59-17.3]	1.41[0.70-2.87]	5.70[4.62-7.04]	Positive	0.37[0.02496-0.73145]	0.0358582	1	5	142722660	rs9324916	NARAC	non-risk	C	G	C	410	15	9	238	470	359	304	179	37.5[21.1-66.7]	1.01[0.42-2.40]	29.4[16.8-51.4]	Positive	0.21[0.00125-0.42730]	0.0486628	1
7	40874376	rs7809981	EIRA	risk	T	G	T	307	91	72	199	539	338	386	187	7.14[5.32-9.59]	1.23[0.86-1.77]	5.49[4.18-7.21]	Positive	0.19[0.01301-0.38331]	0.0359229	1	7	40874376	rs7809981	NARAC	risk	T	G	T	374	14	10	274	427	331	347	207	40.9[22.7-73.8]	1.05[0.45-2.47]	27.9[15.7-49.8]	Positive	0.31[0.13472-0.49728]	0.000633901	0.96604
5	142673942	rs33944801	EIRA	non-risk	G	C	C	502	157	9	27	910	520	50	18	9.21[5.21-16.2]	1.05[0.48-2.30]	5.67[4.59-7.00]	Positive	0.37[0.02482-0.73164]	0.0359349	1	5	142673942	rs33944801	NARAC	non-risk	G	C	G	409	15	9	239	471	362	303	176	38.2[21.5-68.0]	1.01[0.42-2.40]	29.1[16.7-50.9]	Positive	0.23[0.03017-0.44492]	0.0247557	1
1	218167107	rs10127946	EIRA	non-risk	C	T	T	498	156	14	30	916	491	49	45	3.41[2.19-5.33]	1.44[0.74-2.82]	6.06[4.90-7.49]	Negative	-0.9[-1.7500--0.0593]	0.0359361	1	1	218167107	rs10127946	NARAC	non-risk	C	T	C	268	10	14	380	343	192	431	346	28.2[14.4-55.1]	1.00[0.42-2.35]	39.1[19.8-77.4]	Negative	-0.3[-0.7599--0.0174]	0.0401561	1
19	21126463	rs7254973	EIRA	non-risk	G	C	G	354	116	55	168	637	377	330	159	6.60[4.96-8.80]	1.02[0.70-1.48]	5.23[4.09-6.70]	Positive	0.20[0.01339-0.39510]	0.0359475	1	19	21126463	rs7254973	NARAC	non-risk	G	C	G	439	11	13	209	529	385	245	153	63.0[32.6-121.]	3.05[1.30-7.15]	46.0[24.5-86.4]	Positive	0.23[0.02365-0.45027]	0.0294512	1
19	21128292	rs8113412	EIRA	non-risk	C	T	C	354	116	55	168	637	377	330	159	6.60[4.96-8.80]	1.02[0.70-1.48]	5.23[4.09-6.70]	Positive	0.20[0.01339-0.39510]	0.0359475	1	19	21128292	rs8113412	NARAC	non-risk	C	T	C	439	11	13	209	529	384	245	154	62.9[32.6-121.]	3.05[1.30-7.15]	46.0[24.5-86.5]	Positive	0.23[0.02168-0.44911]	0.030862	1
18	43247001	rs2156609	EIRA	risk	C	G	C	395	124	46	137	687	409	291	135	6.99[5.24-9.34]	1.07[0.72-1.58]	5.44[4.28-6.90]	Positive	0.21[0.01388-0.41068]	0.0359768	1	18	43247001	rs2156609	NARAC	risk	C	G	C	452	14	10	196	526	396	248	142	48.3[26.6-87.7]	1.79[0.75-4.22]	36.1[20.4-63.6]	Positive	0.23[0.01863-0.45468]	0.0333749	1
2	196001319	rs938065	EIRA	risk	A	G	A	330	101	70	200	585	358	390	186	7.00[5.26-9.31]	1.16[0.81-1.65]	5.46[4.20-7.09]	Positive	0.19[0.01281-0.38114]	0.0360445	1	2	196001319	rs938065	NARAC	non-risk	A	G	A	409	13	11	239	471	346	303	192	45.1[24.5-82.9]	1.34[0.57-3.13]	32.2[17.8-58.1]	Positive	0.27[0.08294-0.47391]	0.00524504	1
2	196001454	rs938066	EIRA	risk	T	C	T	330	101	70	200	585	358	390	186	7.00[5.26-9.31]	1.16[0.81-1.65]	5.46[4.20-7.09]	Positive	0.19[0.01281-0.38114]	0.0360445	1	2	196001454	rs938066	NARAC	non-risk	T	C	T	409	13	11	239	471	346	303	192	45.1[24.5-82.9]	1.34[0.57-3.13]	32.2[17.8-58.1]	Positive	0.27[0.08294-0.47391]	0.00524504	1
13	83280335	rs9565801	EIRA	non-risk	A	C	C	424	128	42	106	801	420	173	123	4.74[3.49-6.44]	1.29[0.85-1.94]	6.39[5.07-8.05]	Negative	-0.4[-0.7886--0.0264]	0.0360808	1	13	83280335	rs9565801	NARAC	non-risk	C	A	A	500	18	6	148	609	398	165	140	23.8[13.7-41.1]	1.02[0.38-2.72]	35.6[21.4-59.2]	Negative	-0.4[-0.9491--0.0478]	0.0301399	1
20	8671219	rs6056023	EIRA	non-risk	A	G	A	274	81	88	259	534	266	441	275	5.46[4.08-7.31]	1.14[0.81-1.62]	6.96[5.21-9.31]	Negative	-0.3[-0.5861--0.0196]	0.0361006	1	20	8671219	rs6056023	NARAC	non-risk	A	G	A	355	9	15	293	433	264	341	274	42.6[21.1-85.9]	2.27[0.95-5.39]	56.6[28.1-114.]	Negative	-0.3[-0.7102--0.0099]	0.0438536	1
9	614923	rs11792645	EIRA	non-risk	T	C	C	131	35	132	384	260	117	699	418	6.36[4.29-9.43]	1.29[0.84-1.97]	8.41[5.44-12.9]	Negative	-0.3[-0.7102--0.0237]	0.0361219	1	9	614923	rs11792645	NARAC	non-risk	C	T	T	488	14	10	160	606	401	168	137	30.2[16.5-55.1]	1.92[0.81-4.54]	43.8[24.9-77.2]	Negative	-0.4[-0.9262--0.0383]	0.0332415	1
5	142709723	rs17339455	EIRA	non-risk	C	T	T	504	156	12	27	909	521	53	18	9.85[5.59-17.3]	1.41[0.70-2.87]	5.71[4.62-7.05]	Positive	0.37[0.02435-0.73127]	0.0361653	1	5	142709723	rs17339455	NARAC	non-risk	C	T	C	409	15	9	239	470	359	304	179	37.5[21.1-66.6]	1.01[0.42-2.40]	29.4[16.8-51.4]	Positive	0.21[0.00128-0.42734]	0.0486344	1
20	13652982	rs1040756	EIRA	non-risk	C	A	C	157	52	117	367	260	169	705	366	6.09[4.32-8.57]	1.00[0.68-1.46]	4.82[3.33-7.00]	Positive	0.20[0.01328-0.40128]	0.0362384	1	20	13652982	rs1040756	NARAC	non-risk	C	A	C	209	6	18	439	228	195	546	343	46.1[19.8-107.]	1.48[0.56-3.88]	35.5[15.0-84.1]	Positive	0.21[0.00348-0.43327]	0.0463911	1
20	8670262	rs6056017	EIRA	non-risk	T	C	T	274	81	87	256	534	265	436	271	5.50[4.10-7.36]	1.14[0.81-1.62]	7.02[5.25-9.40]	Negative	-0.3[-0.5901--0.0195]	0.0362422	1	20	8670262	rs6056017	NARAC	non-risk	T	C	T	355	9	15	293	433	264	341	274	42.6[21.1-85.9]	2.27[0.95-5.39]	56.6[28.1-114.]	Negative	-0.3[-0.7102--0.0099]	0.0438536	1
6	70873331	rs2296010	EIRA	risk	A	G	G	74	19	147	452	108	82	846	450	7.58[4.48-12.8]	1.29[0.74-2.22]	5.39[3.00-9.70]	Positive	0.24[0.01598-0.48321]	0.0362503	1	6	70873331	rs2296010	NARAC	non-risk	A	G	A	247	9	15	401	269	203	505	335	38.3[18.9-77.6]	1.10[0.46-2.62]	27.7[13.5-56.8]	Positive	0.27[0.07809-0.46917]	0.00609267	1
2	60494510	rs4672377	EIRA	non-risk	G	C	C	127	37	131	402	184	125	773	401	6.62[4.50-9.75]	1.09[0.72-1.66]	5.04[3.27-7.78]	Positive	0.22[0.01428-0.43227]	0.0362618	1	2	60494510	rs4672377	NARAC	non-risk	G	C	C	474	16	8	174	574	429	200	109	45.1[25.2-80.8]	1.18[0.48-2.88]	31.0[18.2-53.0]	Positive	0.30[0.09219-0.52472]	0.00518027	1
19	46927335	rs4803946	EIRA	non-risk	T	C	T	168	36	130	346	304	145	648	376	8.10[5.51-11.8]	1.74[1.15-2.64]	10.0[6.62-15.1]	Negative	-0.3[-0.6369--0.0210]	0.0362779	1	19	46927335	rs4803946	NARAC	non-risk	T	C	T	478	11	13	170	572	350	202	188	39.5[20.5-75.8]	3.86[1.64-9.05]	61.8[32.8-116.]	Negative	-0.6[-1.0940--0.1822]	0.00607914	1
19	21123994	rs7250207	EIRA	non-risk	G	A	G	355	116	55	168	637	377	330	159	6.62[4.97-8.82]	1.02[0.70-1.48]	5.25[4.10-6.72]	Positive	0.20[0.01296-0.39476]	0.0363404	1	19	21123994	rs7250207	NARAC	non-risk	G	A	G	439	11	13	209	529	385	245	153	63.0[32.6-121.]	3.05[1.30-7.15]	46.0[24.5-86.4]	Positive	0.23[0.02365-0.45027]	0.0294512	1
6	70909779	rs3806065	EIRA	non-risk	C	T	T	98	27	144	435	164	117	815	427	7.08[4.53-11.0]	1.21[0.75-1.94]	5.28[3.22-8.63]	Positive	0.22[0.01427-0.43578]	0.0363716	1	6	70909779	rs3806065	NARAC	non-risk	C	T	C	199	7	17	449	232	171	542	367	35.5[16.0-78.5]	1.03[0.41-2.61]	27.7[12.3-62.2]	Positive	0.21[0.00120-0.43599]	0.0487364	1
2	52006583	rs12713154	EIRA	non-risk	T	C	C	68	18	153	465	106	80	873	464	7.30[4.28-12.4]	1.25[0.72-2.18]	5.19[2.85-9.43]	Positive	0.25[0.01596-0.49120]	0.0364669	1	2	52006583	rs12713154	NARAC	risk	T	C	T	312	10	14	336	321	268	453	270	38.7[19.8-75.5]	1.15[0.49-2.70]	30.3[15.5-59.3]	Positive	0.21[0.00856-0.41761]	0.0411448	1
18	49219879	rs1699901	EIRA	non-risk	C	T	T	110	35	136	421	193	131	783	413	6.02[4.03-8.99]	1.00[0.65-1.54]	4.66[2.99-7.26]	Positive	0.22[0.01405-0.43343]	0.0364974	1	18	49219879	rs1699901	NARAC	non-risk	C	T	C	175	6	18	473	226	174	548	364	42.8[18.2-100.]	1.30[0.49-3.42]	31.5[13.2-75.0]	Positive	0.25[0.04896-0.46280]	0.0153591	1
18	43246779	rs2170973	EIRA	risk	C	T	C	396	124	47	137	687	409	292	135	7.04[5.27-9.40]	1.09[0.74-1.62]	5.45[4.30-6.91]	Positive	0.21[0.01322-0.40989]	0.0365563	1	18	43246779	rs2170973	NARAC	risk	C	T	C	452	14	10	196	526	396	248	142	48.3[26.6-87.7]	1.79[0.75-4.22]	36.1[20.4-63.6]	Positive	0.23[0.01863-0.45468]	0.0333749	1
18	43247531	rs9953176	EIRA	risk	T	G	T	396	124	47	137	687	409	292	135	7.04[5.27-9.40]	1.09[0.74-1.62]	5.45[4.30-6.91]	Positive	0.21[0.01322-0.40989]	0.0365563	1	18	43247531	rs9953176	NARAC	risk	T	G	T	452	14	10	196	526	396	248	142	48.3[26.6-87.7]	1.79[0.75-4.22]	36.1[20.4-63.6]	Positive	0.23[0.01863-0.45468]	0.0333749	1
3	68618894	rs13314272	EIRA	risk	A	G	G	54	15	152	471	81	61	882	471	6.76[3.76-12.1]	1.14[0.62-2.08]	4.72[2.42-9.17]	Positive	0.28[0.01754-0.54395]	0.0365582	1	3	68618894	rs13314272	NARAC	risk	A	G	A	328	8	16	320	343	255	431	283	54.2[25.9-113.]	1.99[0.82-4.83]	41.8[19.9-87.8]	Positive	0.21[0.00686-0.41334]	0.0427402	1
9	123404610	rs1324473	EIRA	risk	T	C	T	266	84	87	267	447	276	532	268	6.39[4.79-8.52]	1.01[0.71-1.44]	5.14[3.85-6.87]	Positive	0.19[0.01188-0.37093]	0.0366429	1	9	123404610	rs1324473	NARAC	non-risk	T	C	T	318	9	15	330	361	278	413	260	53.0[26.2-107.]	1.93[0.81-4.59]	39.8[19.6-80.4]	Positive	0.23[0.03432-0.42880]	0.0213853	1
13	83288678	rs9531384	EIRA	non-risk	T	C	C	423	128	40	107	797	418	170	122	4.68[3.44-6.36]	1.21[0.79-1.83]	6.38[5.06-8.05]	Negative	-0.4[-0.7930--0.0253]	0.0366514	1	13	83288678	rs9531384	NARAC	non-risk	C	T	T	500	18	6	148	609	398	165	140	23.8[13.7-41.1]	1.02[0.38-2.72]	35.6[21.4-59.2]	Negative	-0.4[-0.9491--0.0478]	0.0301399	1
3	171180685	rs12634193	EIRA	risk	T	C	T	310	94	77	223	527	326	452	218	6.93[5.22-9.20]	1.14[0.80-1.62]	5.45[4.16-7.15]	Positive	0.19[0.01190-0.37213]	0.0366598	1	3	171180685	rs12634193	NARAC	risk	T	C	T	372	13	11	276	402	306	372	232	39.6[21.7-72.3]	1.12[0.48-2.61]	29.6[16.3-53.6]	Positive	0.25[0.05397-0.44694]	0.0124754	1
9	123484115	rs10985000	EIRA	risk	A	G	A	252	83	84	252	435	265	519	258	6.21[4.64-8.31]	1.00[0.70-1.42]	5.00[3.72-6.70]	Positive	0.19[0.01202-0.37730]	0.0367	1	9	123484115	rs10985000	NARAC	non-risk	A	G	A	319	9	15	329	357	277	417	261	54.0[26.6-109.]	1.96[0.82-4.67]	39.7[19.6-80.3]	Positive	0.24[0.05317-0.43946]	0.0124332	1
6	19801078	rs34388787	EIRA	non-risk	C	A	C	203	59	101	309	374	180	554	342	5.55[4.02-7.65]	1.10[0.76-1.59]	7.24[5.14-10.1]	Negative	-0.3[-0.6259--0.0199]	0.0367062	1	6	19801078	rs34388787	NARAC	non-risk	C	A	C	257	9	15	391	336	214	438	324	33.6[16.6-68.0]	1.33[0.56-3.17]	45.8[22.4-93.8]	Negative	-0.3[-0.7387--0.0088]	0.0447065	1
10	85750023	rs10887195	EIRA	risk	C	T	C	327	95	76	206	530	329	449	215	7.25[5.46-9.61]	1.25[0.88-1.77]	5.61[4.29-7.34]	Positive	0.19[0.01179-0.37089]	0.0367301	1	10	85750023	rs10887195	NARAC	risk	C	T	C	407	14	10	241	473	364	301	174	39.7[22.0-71.6]	1.07[0.45-2.52]	29.7[16.8-52.7]	Positive	0.24[0.04414-0.45311]	0.0171643	1
9	123453281	rs966396	EIRA	risk	T	C	T	266	84	87	267	447	276	532	268	6.39[4.79-8.52]	1.01[0.72-1.44]	5.14[3.85-6.87]	Positive	0.19[0.01178-0.37092]	0.0367429	1	9	123453281	rs966396	NARAC	non-risk	T	C	T	322	9	15	326	364	281	410	257	53.3[26.3-107.]	1.95[0.82-4.64]	40.0[19.8-80.9]	Positive	0.23[0.03312-0.42805]	0.0220946	1
1	238932382	rs71644945	EIRA	non-risk	G	T	G	122	36	132	402	242	107	719	426	5.85[3.94-8.68]	1.12[0.73-1.71]	8.00[5.15-12.4]	Negative	-0.3[-0.7556--0.0239]	0.0367923	1	1	238932382	rs71644945	NARAC	non-risk	G	T	G	169	6	18	479	200	113	574	425	31.5[13.4-73.7]	1.09[0.41-2.88]	45.6[18.9-109.]	Negative	-0.4[-0.8966--0.0064]	0.046745	1
18	49216636	rs1504504	EIRA	non-risk	C	T	T	110	35	136	422	193	130	782	410	6.06[4.06-9.05]	1.00[0.65-1.54]	4.70[3.01-7.32]	Positive	0.22[0.01360-0.43366]	0.0368901	1	18	49216636	rs1504504	NARAC	non-risk	C	T	C	175	6	18	473	226	174	548	364	42.8[18.2-100.]	1.30[0.49-3.42]	31.5[13.2-75.0]	Positive	0.25[0.04896-0.46280]	0.0153591	1
15	90384066	rs2882752	EIRA	risk	A	G	G	120	29	134	393	196	134	756	385	8.32[5.43-12.7]	1.41[0.90-2.23]	6.14[3.86-9.76]	Positive	0.21[0.01287-0.41084]	0.0369072	1	15	90384066	rs2882752	NARAC	risk	A	G	A	481	18	6	167	544	424	230	114	45.3[26.1-78.6]	1.07[0.40-2.81]	29.1[17.4-48.4]	Positive	0.35[0.16507-0.54773]	0.000261152	0.508256
2	196053643	rs12996952	EIRA	non-risk	C	T	C	332	99	59	174	592	364	339	163	7.09[5.28-9.51]	1.14[0.78-1.65]	5.50[4.23-7.15]	Positive	0.20[0.01233-0.39453]	0.0369336	1	2	196053643	rs12996952	NARAC	non-risk	C	T	C	415	13	11	233	503	373	271	165	48.3[26.1-89.3]	1.49[0.64-3.47]	33.7[18.7-60.8]	Positive	0.29[0.09472-0.48864]	0.00370081	1
2	196054688	rs1511261	EIRA	non-risk	A	C	A	332	99	59	174	592	364	339	163	7.09[5.28-9.51]	1.14[0.78-1.65]	5.50[4.23-7.15]	Positive	0.20[0.01233-0.39453]	0.0369336	1	2	196054688	rs1511261	NARAC	non-risk	A	C	A	415	13	11	233	503	373	271	165	48.3[26.1-89.3]	1.49[0.64-3.47]	33.7[18.7-60.8]	Positive	0.29[0.09472-0.48864]	0.00370081	1
2	196054636	rs1511262	EIRA	non-risk	A	T	A	332	99	59	174	592	364	339	163	7.09[5.28-9.51]	1.14[0.78-1.65]	5.50[4.23-7.15]	Positive	0.20[0.01233-0.39453]	0.0369336	1	2	196054636	rs1511262	NARAC	non-risk	A	T	A	415	13	11	233	503	373	271	165	48.3[26.1-89.3]	1.49[0.64-3.47]	33.7[18.7-60.8]	Positive	0.29[0.09472-0.48864]	0.00370081	1
2	196053880	rs1511265	EIRA	non-risk	T	G	T	332	99	59	174	592	364	339	163	7.09[5.28-9.51]	1.14[0.78-1.65]	5.50[4.23-7.15]	Positive	0.20[0.01233-0.39453]	0.0369336	1	2	196053880	rs1511265	NARAC	non-risk	T	G	T	415	13	11	233	503	373	271	165	48.3[26.1-89.3]	1.49[0.64-3.47]	33.7[18.7-60.8]	Positive	0.29[0.09472-0.48864]	0.00370081	1
2	196053824	rs1511266	EIRA	non-risk	G	T	G	332	99	59	174	592	364	339	163	7.09[5.28-9.51]	1.14[0.78-1.65]	5.50[4.23-7.15]	Positive	0.20[0.01233-0.39453]	0.0369336	1	2	196053824	rs1511266	NARAC	non-risk	G	T	G	415	13	11	233	503	373	271	165	48.3[26.1-89.3]	1.49[0.64-3.47]	33.7[18.7-60.8]	Positive	0.29[0.09472-0.48864]	0.00370081	1
2	34215812	rs1818421	EIRA	non-risk	A	G	A	294	93	78	238	481	296	491	243	6.46[4.87-8.56]	1.02[0.72-1.45]	5.20[3.94-6.85]	Positive	0.19[0.01158-0.37135]	0.0369588	1	2	34215812	rs1818421	NARAC	risk	A	G	A	372	10	14	276	393	304	381	234	47.4[24.2-92.7]	1.63[0.69-3.83]	36.7[18.9-71.5]	Positive	0.21[0.00703-0.41579]	0.0426132	1
17	70378956	rs8066483	EIRA	risk	G	A	A	29	6	162	483	31	28	920	505	9.28[3.81-22.6]	1.67[0.68-4.12]	5.41[1.94-15.0]	Positive	0.34[0.02078-0.66793]	0.0369885	1	17	70378956	rs8066483	NARAC	non-risk	G	A	G	401	14	10	247	471	346	303	192	44.5[24.6-80.4]	1.51[0.64-3.56]	33.9[19.1-60.2]	Positive	0.22[0.02099-0.43235]	0.0307659	1
16	52227939	rs12925859	EIRA	non-risk	C	G	G	36	10	156	473	65	51	877	474	6.93[3.40-14.1]	1.21[0.58-2.51]	4.64[2.09-10.2]	Positive	0.29[0.01798-0.58007]	0.0370295	1	16	52227939	rs12925859	NARAC	risk	C	G	C	387	12	12	261	407	311	367	227	43.3[23.2-80.7]	1.36[0.58-3.15]	32.5[17.6-60.2]	Positive	0.23[0.03989-0.43883]	0.0186726	1
7	40877397	rs10246441	EIRA	risk	G	A	G	307	93	74	205	546	338	402	194	7.01[5.24-9.38]	1.20[0.84-1.72]	5.44[4.14-7.13]	Positive	0.19[0.01173-0.37902]	0.0370493	1	7	40877397	rs10246441	NARAC	risk	G	A	G	377	14	10	271	435	334	339	204	41.8[23.2-75.4]	1.12[0.47-2.62]	28.9[16.2-51.4]	Positive	0.30[0.12266-0.49030]	0.00108345	1
15	94500434	rs34880672	EIRA	non-risk	G	A	G	206	62	108	320	343	221	619	314	6.59[4.80-9.04]	1.10[0.77-1.58]	5.20[3.73-7.25]	Positive	0.19[0.01159-0.37769]	0.0371482	1	15	94500434	rs34880672	NARAC	risk	G	A	G	279	9	15	369	311	243	463	295	39.2[19.4-79.1]	1.16[0.49-2.77]	30.4[15.0-61.7]	Positive	0.21[0.01572-0.42360]	0.0347618	1
3	68620436	rs9820828	EIRA	non-risk	A	G	G	53	15	152	469	81	61	880	471	6.61[3.68-11.9]	1.12[0.61-2.05]	4.63[2.38-9.01]	Positive	0.28[0.01672-0.54556]	0.0371644	1	3	68620436	rs9820828	NARAC	risk	A	G	A	328	8	16	320	343	255	431	283	54.2[25.9-113.]	1.99[0.82-4.83]	41.8[19.9-87.8]	Positive	0.21[0.00686-0.41334]	0.0427402	1
3	68620449	rs9820953	EIRA	non-risk	A	G	G	53	15	152	469	81	61	880	471	6.61[3.68-11.9]	1.12[0.61-2.05]	4.63[2.38-9.01]	Positive	0.28[0.01672-0.54556]	0.0371644	1	3	68620449	rs9820953	NARAC	risk	A	G	A	328	8	16	320	343	255	431	283	54.2[25.9-113.]	1.99[0.82-4.83]	41.8[19.9-87.8]	Positive	0.21[0.00686-0.41334]	0.0427402	1
6	6266553	rs3024360	EIRA	risk	T	C	T	371	113	57	159	665	399	304	141	7.26[5.42-9.73]	1.18[0.82-1.72]	5.57[4.35-7.13]	Positive	0.20[0.01214-0.40179]	0.0373248	1	6	6266553	rs3024360	NARAC	risk	T	C	T	487	16	8	161	526	405	248	133	45.6[25.8-80.4]	1.45[0.59-3.58]	32.5[19.0-55.4]	Positive	0.27[0.06883-0.48539]	0.00911444	1
15	40104233	rs1166777	EIRA	non-risk	G	T	G	152	45	119	358	244	165	696	364	6.56[4.58-9.39]	1.12[0.75-1.66]	5.08[3.44-7.50]	Positive	0.20[0.01208-0.40096]	0.0373628	1	15	40104233	rs1166777	NARAC	non-risk	T	G	T	470	13	11	178	566	423	208	115	56.1[30.0-104.]	2.55[1.09-5.96]	41.6[23.1-74.7]	Positive	0.23[0.00128-0.46157]	0.0487306	1
1	238933426	rs12743249	EIRA	non-risk	G	A	G	122	36	132	402	243	107	717	423	5.87[3.95-8.71]	1.12[0.73-1.71]	8.02[5.16-12.4]	Negative	-0.3[-0.7534--0.0226]	0.0373822	1	1	238933426	rs12743249	NARAC	non-risk	G	A	G	169	6	18	479	200	113	574	425	31.5[13.4-73.7]	1.09[0.41-2.88]	45.6[18.9-109.]	Negative	-0.4[-0.8966--0.0064]	0.046745	1
1	218176017	rs7520162	EIRA	non-risk	A	G	G	487	149	13	27	886	474	45	42	3.43[2.16-5.44]	1.53[0.76-3.08]	6.20[4.99-7.69]	Negative	-0.9[-1.8680--0.0561]	0.0373975	1	1	218176017	rs7520162	NARAC	non-risk	A	G	A	268	10	14	380	342	191	432	347	28.2[14.4-55.2]	1.00[0.42-2.35]	39.0[19.7-77.2]	Negative	-0.3[-0.7516--0.0122]	0.042877	1
1	110967354	rs2132989	EIRA	non-risk	A	T	T	34	9	159	487	38	33	922	500	6.95[3.29-14.6]	1.21[0.56-2.58]	4.36[1.82-10.4]	Positive	0.34[0.01986-0.66426]	0.0374493	1	1	110967354	rs2132989	NARAC	risk	A	T	A	407	13	11	241	445	332	329	206	42.8[23.4-78.2]	1.36[0.58-3.16]	32.6[18.1-59.0]	Positive	0.22[0.02299-0.43330]	0.0292824	1
7	40887745	rs10266350	EIRA	risk	G	A	G	338	101	66	188	572	351	386	185	7.16[5.38-9.53]	1.18[0.82-1.70]	5.57[4.29-7.23]	Positive	0.19[0.01128-0.38048]	0.037544	1	7	40887745	rs10266350	NARAC	non-risk	G	A	G	407	15	9	241	474	351	300	187	40.5[22.8-71.9]	1.15[0.48-2.75]	30.4[17.4-53.1]	Positive	0.24[0.03933-0.44810]	0.0194272	1
7	40888598	rs3801239	EIRA	risk	A	G	A	338	101	66	188	572	351	386	185	7.16[5.38-9.53]	1.18[0.82-1.70]	5.57[4.29-7.23]	Positive	0.19[0.01128-0.38048]	0.037544	1	7	40888598	rs3801239	NARAC	non-risk	A	G	A	407	15	9	241	474	351	300	187	40.5[22.8-71.9]	1.15[0.48-2.75]	30.4[17.4-53.1]	Positive	0.24[0.03933-0.44810]	0.0194272	1
7	40891126	rs4085300	EIRA	risk	A	G	A	338	101	66	188	572	351	386	185	7.16[5.38-9.53]	1.18[0.82-1.70]	5.57[4.29-7.23]	Positive	0.19[0.01128-0.38048]	0.037544	1	7	40891126	rs4085300	NARAC	non-risk	A	G	A	407	15	9	241	474	350	300	188	40.4[22.7-71.7]	1.15[0.48-2.75]	30.5[17.4-53.2]	Positive	0.24[0.03623-0.44624]	0.0210835	1
2	67830279	rs2902023	EIRA	non-risk	A	G	A	347	111	60	186	645	386	334	158	6.67[5.00-8.89]	1.00[0.69-1.44]	5.31[4.13-6.82]	Positive	0.20[0.01160-0.39392]	0.0376213	1	2	67830279	rs2902023	NARAC	risk	A	G	A	425	9	15	223	465	353	309	185	69.2[34.1-140.]	3.18[1.33-7.59]	49.7[24.8-99.5]	Positive	0.24[0.05018-0.44969]	0.0141916	1
7	40876060	rs12538907	EIRA	risk	T	C	T	307	93	74	205	546	338	400	193	7.01[5.24-9.38]	1.20[0.84-1.72]	5.43[4.14-7.12]	Positive	0.19[0.01116-0.37900]	0.0376223	1	7	40876060	rs12538907	NARAC	non-risk	T	C	T	378	14	10	270	435	334	339	204	41.9[23.2-75.5]	1.12[0.48-2.63]	28.9[16.2-51.5]	Positive	0.30[0.12252-0.49025]	0.00109005	1
9	614380	rs5008774	EIRA	non-risk	A	C	C	134	35	134	390	262	118	703	419	6.56[4.43-9.71]	1.32[0.86-2.01]	8.60[5.58-13.2]	Negative	-0.3[-0.6991--0.0205]	0.0376633	1	9	614380	rs5008774	NARAC	non-risk	C	A	A	488	14	10	160	606	401	168	137	30.2[16.5-55.1]	1.92[0.81-4.54]	43.8[24.9-77.2]	Negative	-0.4[-0.9262--0.0383]	0.0332415	1
9	123478769	rs10984994	EIRA	risk	T	A	T	246	77	84	252	426	261	518	257	6.56[4.86-8.85]	1.05[0.73-1.51]	5.23[3.87-7.07]	Positive	0.19[0.01094-0.37625]	0.0377592	1	9	123478769	rs10984994	NARAC	non-risk	T	A	T	319	9	15	329	357	277	417	261	54.0[26.6-109.]	1.96[0.82-4.67]	39.7[19.6-80.3]	Positive	0.24[0.05317-0.43946]	0.0124332	1
2	165675693	rs441414	EIRA	non-risk	G	A	G	395	124	44	129	735	433	224	101	7.23[5.29-9.87]	1.08[0.73-1.62]	5.50[4.34-6.96]	Positive	0.22[0.01280-0.44037]	0.0377663	1	2	165675693	rs441414	NARAC	risk	G	A	G	505	17	7	143	583	439	191	99	48.4[27.4-85.7]	1.51[0.59-3.84]	32.5[19.4-54.7]	Positive	0.31[0.10172-0.53319]	0.00392466	1
2	196183832	rs55766017	EIRA	risk	T	C	T	336	97	65	179	606	365	336	156	7.58[5.63-10.2]	1.24[0.86-1.79]	5.79[4.45-7.53]	Positive	0.20[0.01145-0.39504]	0.0377981	1	2	196183832	rs55766017	NARAC	non-risk	T	C	T	416	15	9	232	494	359	280	179	40.5[22.7-72.3]	1.14[0.47-2.70]	30.5[17.5-53.3]	Positive	0.24[0.03564-0.45035]	0.0216255	1
7	40872428	rs6949092	EIRA	non-risk	C	T	C	340	101	63	185	602	365	355	168	7.30[5.46-9.77]	1.16[0.80-1.67]	5.68[4.38-7.37]	Positive	0.19[0.01123-0.38775]	0.0378017	1	7	40872428	rs6949092	NARAC	non-risk	C	T	C	432	13	11	216	496	369	278	169	47.6[25.9-87.6]	1.71[0.73-3.99]	36.1[20.0-65.1]	Positive	0.22[0.01286-0.44103]	0.0377299	1
9	117490814	rs6478104	EIRA	non-risk	A	C	A	392	125	43	135	688	405	277	128	6.88[5.14-9.21]	1.00[0.67-1.50]	5.40[4.26-6.85]	Positive	0.21[0.01199-0.41396]	0.037806	1	9	117490814	rs6478104	NARAC	risk	A	C	A	500	17	7	148	529	402	245	136	42.0[24.1-73.0]	1.33[0.52-3.36]	31.9[18.9-53.8]	Positive	0.23[0.01008-0.45253]	0.0404251	1
18	43246329	rs2170972	EIRA	risk	G	T	G	395	124	47	138	687	409	291	135	6.99[5.24-9.34]	1.08[0.73-1.60]	5.43[4.28-6.89]	Positive	0.21[0.01175-0.40919]	0.037895	1	18	43246329	rs2170972	NARAC	risk	G	T	G	452	14	10	196	526	396	248	142	48.3[26.6-87.7]	1.79[0.75-4.22]	36.1[20.4-63.6]	Positive	0.23[0.01863-0.45468]	0.0333749	1
18	43245986	rs7234198	EIRA	risk	T	G	T	395	124	47	138	687	409	291	135	6.99[5.24-9.34]	1.08[0.73-1.60]	5.43[4.28-6.89]	Positive	0.21[0.01175-0.40919]	0.037895	1	18	43245986	rs7234198	NARAC	risk	T	G	T	452	14	10	196	527	396	247	142	48.2[26.5-87.5]	1.79[0.75-4.22]	36.1[20.5-63.7]	Positive	0.23[0.01477-0.45272]	0.0364172	1
2	60490927	rs10174891	EIRA	non-risk	T	C	C	126	37	131	402	182	124	770	402	6.53[4.43-9.63]	1.09[0.71-1.65]	4.99[3.23-7.70]	Positive	0.22[0.01241-0.43287]	0.0379218	1	2	60490927	rs10174891	NARAC	non-risk	T	C	C	474	16	8	174	576	431	198	107	45.6[25.5-81.7]	1.18[0.48-2.88]	31.0[18.1-52.9]	Positive	0.31[0.10189-0.53197]	0.00386801	1
3	71790072	rs7626678	EIRA	risk	C	G	C	199	58	108	303	337	223	589	305	6.86[4.95-9.51]	1.24[0.86-1.80]	5.29[3.76-7.44]	Positive	0.19[0.01062-0.37516]	0.0380529	1	3	71790072	rs7626678	NARAC	non-risk	C	G	C	217	6	18	431	254	207	520	331	49.2[21.2-114.]	1.58[0.60-4.13]	36.2[15.4-85.0]	Positive	0.25[0.05348-0.45326]	0.012974	1
6	147675071	rs2047286	EIRA	non-risk	G	A	A	83	25	145	438	150	106	808	430	6.54[4.11-10.4]	1.13[0.69-1.84]	4.88[2.91-8.16]	Positive	0.23[0.01282-0.45442]	0.0380952	1	6	147675071	rs2047286	NARAC	non-risk	G	A	G	237	8	16	411	277	226	497	312	43.4[20.6-91.2]	1.33[0.54-3.23]	31.6[14.9-67.0]	Positive	0.26[0.06945-0.45810]	0.00780226	1
11	122641086	rs4936742	EIRA	non-risk	T	C	C	450	144	27	83	836	437	143	107	4.27[3.11-5.86]	1.05[0.65-1.68]	6.10[4.88-7.62]	Negative	-0.4[-0.8558--0.0240]	0.0381469	1	11	122641086	rs4936742	NARAC	non-risk	T	C	T	446	14	10	202	536	331	238	207	30.6[16.9-55.1]	1.71[0.72-4.02]	44.0[24.8-78.1]	Negative	-0.4[-0.8580--0.0688]	0.0213338	1
3	171181519	rs7637296	EIRA	risk	G	T	G	314	89	70	196	528	329	403	192	7.50[5.59-10.0]	1.26[0.88-1.81]	5.77[4.39-7.60]	Positive	0.19[0.01041-0.37955]	0.038401	1	3	171181519	rs7637296	NARAC	risk	G	T	G	379	13	11	269	419	318	355	220	41.2[22.5-75.2]	1.18[0.51-2.76]	30.2[16.7-54.8]	Positive	0.26[0.06537-0.45486]	0.00884455	1
9	577343	rs2804273	EIRA	non-risk	T	C	C	132	35	134	391	261	118	694	416	6.39[4.31-9.48]	1.29[0.84-1.97]	8.40[5.45-12.9]	Negative	-0.3[-0.7012--0.0191]	0.0384297	1	9	577343	rs2804273	NARAC	non-risk	C	T	T	491	15	9	157	606	401	168	137	28.5[15.8-51.2]	1.69[0.70-4.07]	41.6[24.0-72.0]	Negative	-0.4[-0.9278--0.0388]	0.0330817	1
[truncated: 290 more rows]

## Sheet: Table S4
Table S4. Distribution across the human genome of the selected SNPs in interaction with the HLA-DRB1 SE alleles
[truncated: 25 more rows]

## Sheet: Table S5
Table S5. SE-eQTLs observed in ACPA-positive RA patients. The 1492 SNPs in consistent interaction with the HLA-DRB1 SE alleles in both EIRA and NARAC were tested. Genes located in a 2Mb window of each SNP where included in the analysis.
[truncated: 1,506 more rows]

[truncated: 3 more sheets: Table S6, Table S7, Table S8]
